# Supplementary material
Source: publisher figshare collection journal article supplement (https://acs.figshare.com/ndownloader/files/3803062)
Supplement: Supplementary file 1 [file 3803062]

data_Benperidol_II
_audit_creation_date              2014-12-02
_audit_creation_method
;
Olex2 1.2
(compiled 2014.11.28 svn.r3106 for OlexSys, GUI svn.r4959)
;
_shelxl_version_number            2013-2

_publ_contact_author_email        'agris.berzins@lu.lv'
_publ_contact_author_name         'Agris Berzins'
_publ_contact_author_phone        +37167372576

_publ_requested_journal           'Cryst.Growth Des.'
_publ_section_title
;
Structural characterization and rationalization of formation,
 stability, and transformations of benperidol solvates
;
_publ_contact_author_address
;
Faculty of Chemistry
University of Latvia
Kr.Valdemara 48 
Riga
LV-1013
Latvia
;

_publ_contact_letter
;
The CIF file contains data for the structure benperidol acetonitrile solvate 
from the paper 

"Structural characterization and rationalization of formation,
stability, and transformations of benperidol solvates"

by Agris Berzins, Edgards Skarbulis, and Andris Actins 

The paper will be submitted to Cryst.Growth Des. 
;
loop_
_publ_author_name
_publ_author_address
'Berzins, Agris'
;
Faculty of Chemistry
University of Latvia
Kr.Valdemara 48 
Riga
LV-1013
Latvia
;
'Skarbulis, Edgars'
;
Faculty of Chemistry
University of Latvia
Kr.Valdemara 48 
Riga
LV-1013
Latvia
;
'Actins, Andris'
;
Faculty of Chemistry
University of Latvia
Kr.Valdemara 48 
Riga
LV-1013
Latvia
;
_publ_section_references
;
Dolomanov, O.V., Bourhis, L.J., Gildea, R.J, Howard, J.A.K. & Puschmann, H.
 (2009), J. Appl. Cryst. 42, 339-341.

Sheldrick, G.M. (2008). Acta Cryst. A64, 112-122.
;
_chemical_name_common         'benperidol polymorph II'
_chemical_name_systematic     
;
1-{1-[4-(4-fluorophenyl)-4-oxobutyl]piperidin-4-yl}
-1,3-dihydro-2H-benzimidazol-2-one polymorph II
;
_chemical_formula_moiety          'C22 H24 F N3 O2'
_chemical_formula_sum             'C22 H24 F N3 O2'
_chemical_formula_weight          381.44
_chemical_melting_point           ?
loop_
  _atom_type_symbol
  _atom_type_description
  _atom_type_scat_dispersion_real
  _atom_type_scat_dispersion_imag
  _atom_type_scat_source
 'C' 'C' 0.0033 0.0016 'International Tables Vol C Tables 4.2.6.8 and 6.1.1.4'
 'H' 'H' 0.0000 0.0000 'International Tables Vol C Tables 4.2.6.8 and 6.1.1.4'
 'F' 'F' 0.0171 0.0103 'International Tables Vol C Tables 4.2.6.8 and 6.1.1.4'
 'N' 'N' 0.0061 0.0033 'International Tables Vol C Tables 4.2.6.8 and 6.1.1.4'
 'O' 'O' 0.0106 0.0060 'International Tables Vol C Tables 4.2.6.8 and 6.1.1.4'

_shelx_space_group_comment
;
The symmetry employed for this shelxl refinement is uniquely defined
by the following loop, which should always be used as a source of
symmetry information in preference to the above space-group names.
They are only intended as comments.
;
_space_group_crystal_system       'triclinic'
_space_group_IT_number            2
_space_group_name_H-M_alt         'P -1'
_space_group_name_Hall            '-P 1'
loop_
  _space_group_symop_operation_xyz
 'x, y, z'
 '-x, -y, -z'

_cell_length_a                    10.8417(3)
_cell_length_b                    16.2903(4)
_cell_length_c                    17.9497(5)
_cell_angle_alpha                 66.7233(11)
_cell_angle_beta                  87.0069(10)
_cell_angle_gamma                 85.0074(16)
_cell_volume                      2900.55(13)
_cell_formula_units_Z             6
_cell_measurement_reflns_used     ?
_cell_measurement_temperature     173(2)
_cell_measurement_theta_max       ?
_cell_measurement_theta_min       ?
_shelx_estimated_absorpt_T_max    ?
_shelx_estimated_absorpt_T_min    ?
_exptl_absorpt_coefficient_mu     0.092
_exptl_absorpt_correction_T_max   ?
_exptl_absorpt_correction_T_min   ?
_exptl_absorpt_correction_type    none
_exptl_absorpt_process_details    ?
_exptl_crystal_colour             'colorless'
_exptl_crystal_density_diffrn     1.310
_exptl_crystal_density_method     'not measured'
_exptl_crystal_F_000              1212
_exptl_crystal_description        'prism'
_exptl_crystal_size_max           0.3
_exptl_crystal_size_mid           0.25
_exptl_crystal_size_min           0.2
_exptl_special_details
;
 ?
;
_exptl_transmission_factor_max    ?
_exptl_transmission_factor_min    ?
_diffrn_reflns_av_R_equivalents   0.0527
_diffrn_reflns_av_unetI/netI      0.1359
_diffrn_reflns_Laue_measured_fraction_full 0.991
_diffrn_reflns_Laue_measured_fraction_max 0.986
_diffrn_reflns_limit_h_max        14
_diffrn_reflns_limit_h_min        -14
_diffrn_reflns_limit_k_max        20
_diffrn_reflns_limit_k_min        -21
_diffrn_reflns_limit_l_max        19
_diffrn_reflns_limit_l_min        -23
_diffrn_reflns_number             19024
_diffrn_reflns_point_group_measured_fraction_full 0.991
_diffrn_reflns_point_group_measured_fraction_max 0.986
_diffrn_reflns_theta_full         25.240
_diffrn_reflns_theta_max          27.501
_diffrn_reflns_theta_min          2.234
_diffrn_ambient_temperature       173(2)
_diffrn_detector_area_resol_mean  9
_diffrn_measured_fraction_theta_full 0.991
_diffrn_measured_fraction_theta_max 0.986
_diffrn_measurement_device_type   'Bruker-Nonius KappaCCD'
_diffrn_measurement_method        '\f and \w scan'
_diffrn_radiation_type            MoK\a
_diffrn_radiation_wavelength      0.71069
_diffrn_radiation_source          'fine-focus sealed tube'
_diffrn_radiation_monochromator   graphite
_diffrn_source                    ?
_reflns_Friedel_coverage          0.000
_reflns_Friedel_fraction_full     .
_reflns_Friedel_fraction_max      .
_reflns_number_gt                 6787
_reflns_number_total              13138
_reflns_special_details
;
 Reflections were merged by SHELXL according to the crystal
 class for the calculation of statistics and refinement.
 
 _reflns_Friedel_fraction is defined as the number of unique
 Friedel pairs measured divided by the number that would be
 possible theoretically, ignoring centric projections and
 systematic absences.
;
_reflns_threshold_expression      'I > 2\s(I)'
_computing_cell_refinement        'HKL Scalepack (Otwinowski & Minor 1997)'
_computing_data_collection        'Collect (Bruker AXS BV, 1997-2004)' 
_computing_data_reduction 'HKL Denzo and Scalepack (Otwinowski & Minor 1997)'
_computing_molecular_graphics     'Olex2 (Dolomanov et al., 2009)'
_computing_publication_material   'Olex2 (Dolomanov et al., 2009)'
_computing_structure_refinement   'ShelXL (Sheldrick, 2008)'
_computing_structure_solution     'ShelXS (Sheldrick, 2008)'
_refine_diff_density_max          0.244
_refine_diff_density_min          -0.285
_refine_diff_density_rms          0.064
_refine_ls_extinction_coef        .
_refine_ls_extinction_method      none
_refine_ls_goodness_of_fit_ref    1.013
_refine_ls_hydrogen_treatment     constr
_refine_ls_matrix_type            full
_refine_ls_number_parameters      757
_refine_ls_number_reflns          13138
_refine_ls_number_restraints      0
_refine_ls_R_factor_all           0.1701
_refine_ls_R_factor_gt            0.0765
_refine_ls_restrained_S_all       1.013
_refine_ls_shift/su_max           0.000
_refine_ls_shift/su_mean          0.000
_refine_ls_structure_factor_coef  Fsqd
_refine_ls_weighting_details
;
 w=1/[\s^2^(Fo^2^)+(0.0401P)^2^+1.6964P]
 where P=(Fo^2^+2Fc^2^)/3
;
_refine_ls_weighting_scheme       calc
_refine_ls_wR_factor_gt           0.1283
_refine_ls_wR_factor_ref          0.1616
_refine_special_details
;
 ?
;
_olex2_refinement_description
;
1. Fixed Uiso
 At 1.2 times of:
  All C(H) groups, All C(H,H) groups, All N(H) groups
2.a Ternary CH refined with riding coordinates:
 C8A(H8A), C8B(H8B), C8C(H8C)
2.b Secondary CH2 refined with riding coordinates:
 C9A(H9AA,H9AB), C10A(H10A,H10B), C11A(H11A,H11B), C12A(H12A,H12B), C13A(H13A,
 H13B), C14A(H14A,H14B), C15A(H15A,H15B), C9B(H9BA,H9BB), C10B(H10C,H10D),
 C11B(H11C,H11D), C12B(H12C,H12D), C13B(H13C,H13D), C14B(H14C,H14D), C15B(H15C,
 H15D), C9C(H9CA,H9CB), C10C(H10E,H10F), C11C(H11E,H11F), C12C(H12E,H12F),
 C13C(H13E,H13F), C14C(H14E,H14F), C15C(H15E,H15F)
2.c Aromatic/amide H refined with riding coordinates:
 C2A(H2A), C3A(H3A), C4A(H4A), C5A(H5A), C18A(H18A), C19A(H19A), C21A(H21A),
 C22A(H22A), N2A(H2AA), C2B(H2B), C3B(H3B), C4B(H4B), C5B(H5B), C18B(H18B),
 C19B(H19B), C21B(H21B), C22B(H22B), N2B(H2BA), C2C(H2C), C3C(H3C), C4C(H4C),
 C5C(H5C), C18C(H18C), C19C(H19C), C21C(H21C), C22C(H22C), N2C(H2CA)
;
_atom_sites_solution_hydrogens    geom
_atom_sites_solution_primary      direct
_atom_sites_solution_secondary    ?
loop_
  _atom_site_label
  _atom_site_type_symbol
  _atom_site_fract_x
  _atom_site_fract_y
  _atom_site_fract_z
  _atom_site_U_iso_or_equiv
  _atom_site_adp_type
  _atom_site_occupancy
  _atom_site_site_symmetry_order
  _atom_site_calc_flag
  _atom_site_refinement_flags_posn
  _atom_site_refinement_flags_adp
  _atom_site_refinement_flags_occupancy
  _atom_site_disorder_assembly
  _atom_site_disorder_group
 C1A C 0.1366(3) 0.06094(18) 0.52249(18) 0.0270(7) Uani 1 1 d . . . . .
 C2A C 0.4100(2) -0.01563(18) 0.64559(18) 0.0253(7) Uani 1 1 d . . . . .
 H2A H 0.4639 0.0290 0.6359 0.030 Uiso 1 1 calc R . . . .
 C3A C 0.4370(3) -0.10343(19) 0.70077(18) 0.0286(7) Uani 1 1 d . . . . .
 H3A H 0.5111 -0.1176 0.7285 0.034 Uiso 1 1 calc R . . . .
 C4A C 0.3563(3) -0.17030(19) 0.71546(18) 0.0297(7) Uani 1 1 d . . . . .
 H4A H 0.3772 -0.2279 0.7529 0.036 Uiso 1 1 calc R . . . .
 C5A C 0.2450(3) -0.15222(19) 0.67503(18) 0.0287(7) Uani 1 1 d . . . . .
 H5A H 0.1904 -0.1965 0.6849 0.034 Uiso 1 1 calc R . . . .
 C6A C 0.2983(2) 0.00137(17) 0.60606(17) 0.0229(6) Uani 1 1 d . . . . .
 C7A C 0.2188(2) -0.06613(18) 0.61973(18) 0.0250(7) Uani 1 1 d . . . . .
 C8A C 0.3040(2) 0.16575(17) 0.51072(17) 0.0226(6) Uani 1 1 d . . . . .
 H8A H 0.3700 0.1629 0.5472 0.027 Uiso 1 1 calc R . . . .
 C9A C 0.2161(2) 0.24551(17) 0.50384(18) 0.0248(6) Uani 1 1 d . . . . .
 H9AA H 0.1832 0.2386 0.5571 0.030 Uiso 1 1 calc R . . . .
 H9AB H 0.1473 0.2493 0.4699 0.030 Uiso 1 1 calc R . . . .
 C10A C 0.2844(3) 0.33068(18) 0.46709(17) 0.0264(7) Uani 1 1 d . . . . .
 H10A H 0.2277 0.3818 0.4625 0.032 Uiso 1 1 calc R . . . .
 H10B H 0.3506 0.3278 0.5026 0.032 Uiso 1 1 calc R . . . .
 C11A C 0.4258(3) 0.26723(18) 0.39368(19) 0.0283(7) Uani 1 1 d . . . . .
 H11A H 0.4932 0.2653 0.4279 0.034 Uiso 1 1 calc R . . . .
 H11B H 0.4601 0.2761 0.3403 0.034 Uiso 1 1 calc R . . . .
 C12A C 0.3647(3) 0.17862(18) 0.42918(18) 0.0270(7) Uani 1 1 d . . . . .
 H12A H 0.3028 0.1781 0.3923 0.032 Uiso 1 1 calc R . . . .
 H12B H 0.4265 0.1296 0.4357 0.032 Uiso 1 1 calc R . . . .
 C13A C 0.3924(3) 0.42846(18) 0.34743(18) 0.0278(7) Uani 1 1 d . . . . .
 H13A H 0.4497 0.4252 0.3052 0.033 Uiso 1 1 calc R . . . .
 H13B H 0.4392 0.4395 0.3868 0.033 Uiso 1 1 calc R . . . .
 C14A C 0.2958(3) 0.50594(18) 0.31046(19) 0.0316(7) Uani 1 1 d . . . . .
 H14A H 0.2447 0.4926 0.2745 0.038 Uiso 1 1 calc R . . . .
 H14B H 0.2426 0.5121 0.3534 0.038 Uiso 1 1 calc R . . . .
 C15A C 0.3533(3) 0.59391(18) 0.26335(19) 0.0314(7) Uani 1 1 d . . . . .
 H15A H 0.4136 0.6027 0.2971 0.038 Uiso 1 1 calc R . . . .
 H15B H 0.3972 0.5902 0.2161 0.038 Uiso 1 1 calc R . . . .
 C16A C 0.2604(3) 0.67428(19) 0.23577(18) 0.0275(7) Uani 1 1 d . . . . .
 C17A C 0.3051(3) 0.76515(19) 0.18956(18) 0.0282(7) Uani 1 1 d . . . . .
 C18A C 0.2317(3) 0.83897(19) 0.1919(2) 0.0338(8) Uani 1 1 d . . . . .
 H18A H 0.1575 0.8301 0.2215 0.041 Uiso 1 1 calc R . . . .
 C19A C 0.2678(3) 0.9248(2) 0.1510(2) 0.0421(9) Uani 1 1 d . . . . .
 H19A H 0.2184 0.9740 0.1520 0.050 Uiso 1 1 calc R . . . .
 C20A C 0.3771(3) 0.9356(2) 0.1091(2) 0.0481(9) Uani 1 1 d . . . . .
 C21A C 0.4518(3) 0.8656(2) 0.1033(2) 0.0520(10) Uani 1 1 d . . . . .
 H21A H 0.5246 0.8757 0.0722 0.062 Uiso 1 1 calc R . . . .
 C22A C 0.4151(3) 0.7792(2) 0.1453(2) 0.0416(9) Uani 1 1 d . . . . .
 H22A H 0.4649 0.7305 0.1436 0.050 Uiso 1 1 calc R . . . .
 F1A F 0.4142(2) 1.02059(13) 0.06994(16) 0.0818(8) Uani 1 1 d . . . . .
 N1A N 0.2449(2) 0.08011(14) 0.54668(14) 0.0246(6) Uani 1 1 d . . . . .
 N2A N 0.1199(2) -0.02720(15) 0.56801(15) 0.0284(6) Uani 1 1 d . . . . .
 H2AA H 0.0572 -0.0547 0.5651 0.034 Uiso 1 1 calc R . . . .
 N3A N 0.3361(2) 0.34250(14) 0.38742(14) 0.0242(5) Uani 1 1 d . . . . .
 O1A O 0.06589(18) 0.11321(12) 0.46926(13) 0.0332(5) Uani 1 1 d . . . . .
 O2A O 0.15066(19) 0.66601(14) 0.25309(15) 0.0428(6) Uani 1 1 d . . . . .
 C1B C 0.6904(2) 0.58832(18) 0.14200(18) 0.0234(6) Uani 1 1 d . . . . .
 C2B C 0.9594(3) 0.50586(18) 0.26874(18) 0.0278(7) Uani 1 1 d . . . . .
 H2B H 1.0192 0.5471 0.2564 0.033 Uiso 1 1 calc R . . . .
 C3B C 0.9770(3) 0.42030(19) 0.32902(18) 0.0311(7) Uani 1 1 d . . . . .
 H3B H 1.0507 0.4040 0.3572 0.037 Uiso 1 1 calc R . . . .
 C4B C 0.8884(3) 0.35899(19) 0.34818(19) 0.0309(7) Uani 1 1 d . . . . .
 H4B H 0.9038 0.3023 0.3887 0.037 Uiso 1 1 calc R . . . .
 C5B C 0.7764(3) 0.38023(19) 0.30806(18) 0.0275(7) Uani 1 1 d . . . . .
 H5B H 0.7157 0.3395 0.3213 0.033 Uiso 1 1 calc R . . . .
 C6B C 0.8489(2) 0.52682(17) 0.22788(17) 0.0213(6) Uani 1 1 d . . . . .
 C7B C 0.7598(2) 0.46488(18) 0.24753(17) 0.0228(6) Uani 1 1 d . . . . .
 C8B C 0.8768(2) 0.68280(17) 0.12450(17) 0.0225(6) Uani 1 1 d . . . . .
 H8B H 0.9236 0.6883 0.1673 0.027 Uiso 1 1 calc R . . . .
 C9B C 0.8018(3) 0.77202(18) 0.08368(18) 0.0270(7) Uani 1 1 d . . . . .
 H9BA H 0.7457 0.7833 0.1230 0.032 Uiso 1 1 calc R . . . .
 H9BB H 0.7529 0.7698 0.0409 0.032 Uiso 1 1 calc R . . . .
 C10B C 0.8893(3) 0.84720(18) 0.04825(19) 0.0295(7) Uani 1 1 d . . . . .
 H10C H 0.8413 0.9037 0.0217 0.035 Uiso 1 1 calc R . . . .
 H10D H 0.9343 0.8513 0.0918 0.035 Uiso 1 1 calc R . . . .
 C11B C 1.0526(3) 0.74792(18) 0.03096(19) 0.0290(7) Uani 1 1 d . . . . .
 H11C H 1.0965 0.7519 0.0750 0.035 Uiso 1 1 calc R . . . .
 H11D H 1.1134 0.7385 -0.0070 0.035 Uiso 1 1 calc R . . . .
 C12B C 0.9718(3) 0.66959(18) 0.06422(19) 0.0286(7) Uani 1 1 d . . . . .
 H12C H 1.0230 0.6146 0.0908 0.034 Uiso 1 1 calc R . . . .
 H12D H 0.9298 0.6644 0.0201 0.034 Uiso 1 1 calc R . . . .
 C13B C 1.0549(3) 0.90777(18) -0.04868(19) 0.0290(7) Uani 1 1 d . . . . .
 H13C H 1.1109 0.9094 -0.0089 0.035 Uiso 1 1 calc R . . . .
 H13D H 1.0025 0.9632 -0.0669 0.035 Uiso 1 1 calc R . . . .
 C14B C 1.1299(3) 0.90162(19) -0.12058(19) 0.0325(7) Uani 1 1 d . . . . .
 H14C H 1.0737 0.8965 -0.1586 0.039 Uiso 1 1 calc R . . . .
 H14D H 1.1848 0.8475 -0.1015 0.039 Uiso 1 1 calc R . . . .
 C15B C 1.2071(3) 0.98152(19) -0.1652(2) 0.0342(8) Uani 1 1 d . . . . .
 H15C H 1.2515 0.9933 -0.1254 0.041 Uiso 1 1 calc R . . . .
 H15D H 1.2682 0.9651 -0.1993 0.041 Uiso 1 1 calc R . . . .
 C16B C 1.1356(3) 1.06673(19) -0.21731(18) 0.0283(7) Uani 1 1 d . . . . .
 C17B C 1.2030(3) 1.15037(18) -0.25478(17) 0.0249(6) Uani 1 1 d . . . . .
 C18B C 1.1346(3) 1.23300(19) -0.28257(18) 0.0300(7) Uani 1 1 d . . . . .
 H18B H 1.0487 1.2346 -0.2778 0.036 Uiso 1 1 calc R . . . .
 C19B C 1.1915(3) 1.3122(2) -0.31689(19) 0.0337(8) Uani 1 1 d . . . . .
 H19B H 1.1455 1.3671 -0.3349 0.040 Uiso 1 1 calc R . . . .
 C20B C 1.3180(3) 1.3072(2) -0.32364(19) 0.0355(8) Uani 1 1 d . . . . .
 C21B C 1.3900(3) 1.2280(2) -0.2986(2) 0.0385(8) Uani 1 1 d . . . . .
 H21B H 1.4758 1.2273 -0.3050 0.046 Uiso 1 1 calc R . . . .
 C22B C 1.3309(3) 1.1487(2) -0.26321(19) 0.0318(7) Uani 1 1 d . . . . .
 H22B H 1.3777 1.0941 -0.2451 0.038 Uiso 1 1 calc R . . . .
 F1B F 1.37660(19) 1.38527(12) -0.35776(13) 0.0543(6) Uani 1 1 d . . . . .
 N1B N 0.8032(2) 0.60480(14) 0.16417(14) 0.0233(5) Uani 1 1 d . . . . .
 N2B N 0.6628(2) 0.50493(15) 0.19495(15) 0.0263(6) Uani 1 1 d . . . . .
 H2BA H 0.5951 0.4807 0.1956 0.032 Uiso 1 1 calc R . . . .
 N3B N 0.9774(2) 0.83190(14) -0.01021(15) 0.0259(6) Uani 1 1 d . . . . .
 O1B O 0.62422(17) 0.63991(13) 0.08515(13) 0.0313(5) Uani 1 1 d . . . . .
 O2B O 1.02558(19) 1.06834(14) -0.22845(14) 0.0399(6) Uani 1 1 d . . . . .
 C1C C 0.5922(3) 0.53630(18) -0.10898(18) 0.0249(7) Uani 1 1 d . . . . .
 C2C C 0.8414(3) 0.48147(18) 0.03288(17) 0.0253(7) Uani 1 1 d . . . . .
 H2C H 0.8920 0.5284 0.0215 0.030 Uiso 1 1 calc R . . . .
 C3C C 0.8637(3) 0.40053(18) 0.09788(18) 0.0276(7) Uani 1 1 d . . . . .
 H3C H 0.9313 0.3927 0.1305 0.033 Uiso 1 1 calc R . . . .
 C4C C 0.7878(3) 0.33098(18) 0.11545(18) 0.0283(7) Uani 1 1 d . . . . .
 H4C H 0.8046 0.2777 0.1600 0.034 Uiso 1 1 calc R . . . .
 C5C C 0.6865(3) 0.33920(18) 0.06755(17) 0.0266(7) Uani 1 1 d . . . . .
 H5C H 0.6356 0.2924 0.0790 0.032 Uiso 1 1 calc R . . . .
 C6C C 0.7409(2) 0.48975(17) -0.01443(17) 0.0215(6) Uani 1 1 d . . . . .
 C7C C 0.6651(2) 0.41957(18) 0.00251(17) 0.0224(6) Uani 1 1 d . . . . .
 C8C C 0.7499(2) 0.64807(17) -0.12296(17) 0.0230(6) Uani 1 1 d . . . . .
 H8C H 0.8194 0.6466 -0.0896 0.028 Uiso 1 1 calc R . . . .
 C9C C 0.6626(3) 0.72771(18) -0.12694(18) 0.0283(7) Uani 1 1 d . . . . .
 H9CA H 0.5911 0.7316 -0.1588 0.034 Uiso 1 1 calc R . . . .
 H9CB H 0.6339 0.7203 -0.0727 0.034 Uiso 1 1 calc R . . . .
 C10C C 0.7304(3) 0.81271(18) -0.16547(17) 0.0271(7) Uani 1 1 d . . . . .
 H10E H 0.6744 0.8639 -0.1690 0.033 Uiso 1 1 calc R . . . .
 H10F H 0.7988 0.8099 -0.1317 0.033 Uiso 1 1 calc R . . . .
 C11C C 0.8643(3) 0.74918(18) -0.24233(19) 0.0286(7) Uani 1 1 d . . . . .
 H11E H 0.9340 0.7467 -0.2096 0.034 Uiso 1 1 calc R . . . .
 H11F H 0.8954 0.7582 -0.2964 0.034 Uiso 1 1 calc R . . . .
 C12C C 0.8034(3) 0.66128(18) -0.20591(18) 0.0265(7) Uani 1 1 d . . . . .
 H12E H 0.7380 0.6615 -0.2409 0.032 Uiso 1 1 calc R . . . .
 H12F H 0.8640 0.6122 -0.2016 0.032 Uiso 1 1 calc R . . . .
 C13C C 0.8356(3) 0.90974(18) -0.28731(19) 0.0298(7) Uani 1 1 d . . . . .
 H13E H 0.8915 0.9055 -0.3298 0.036 Uiso 1 1 calc R . . . .
 H13F H 0.8842 0.9200 -0.2484 0.036 Uiso 1 1 calc R . . . .
 C14C C 0.7416(3) 0.98885(17) -0.32402(19) 0.0298(7) Uani 1 1 d . . . . .
 H14E H 0.6839 0.9919 -0.2819 0.036 Uiso 1 1 calc R . . . .
 H14F H 0.6950 0.9797 -0.3644 0.036 Uiso 1 1 calc R . . . .
 C15C C 0.8021(3) 1.07713(18) -0.36336(19) 0.0284(7) Uani 1 1 d . . . . .
 H15E H 0.8546 1.0836 -0.3241 0.034 Uiso 1 1 calc R . . . .
 H15F H 0.8546 1.0757 -0.4083 0.034 Uiso 1 1 calc R . . . .
 C16C C 0.7107(3) 1.15700(19) -0.39389(19) 0.0307(7) Uani 1 1 d . . . . .
 C17C C 0.7552(3) 1.24877(18) -0.42581(18) 0.0258(7) Uani 1 1 d . . . . .
 C18C C 0.6693(3) 1.32233(19) -0.4566(2) 0.0356(8) Uani 1 1 d . . . . .
 H18C H 0.5858 1.3128 -0.4560 0.043 Uiso 1 1 calc R . . . .
 C19C C 0.7053(3) 1.40868(19) -0.4878(2) 0.0376(8) Uani 1 1 d . . . . .
 H19C H 0.6479 1.4575 -0.5092 0.045 Uiso 1 1 calc R . . . .
 C20C C 0.8286(3) 1.42031(18) -0.48622(19) 0.0311(7) Uani 1 1 d . . . . .
 C21C C 0.9166(3) 1.35104(19) -0.4556(2) 0.0335(7) Uani 1 1 d . . . . .
 H21C H 0.9994 1.3616 -0.4552 0.040 Uiso 1 1 calc R . . . .
 C22C C 0.8791(3) 1.26459(18) -0.42518(19) 0.0290(7) Uani 1 1 d . . . . .
 H22C H 0.9376 1.2164 -0.4040 0.035 Uiso 1 1 calc R . . . .
 F1C F 0.86552(17) 1.50529(11) -0.51776(12) 0.0460(5) Uani 1 1 d . . . . .
 N1C N 0.6940(2) 0.56136(14) -0.08258(14) 0.0244(5) Uani 1 1 d . . . . .
 N2C N 0.5747(2) 0.44974(15) -0.05667(14) 0.0268(6) Uani 1 1 d . . . . .
 H2CA H 0.5166 0.4187 -0.0600 0.032 Uiso 1 1 calc R . . . .
 N3C N 0.7774(2) 0.82433(14) -0.24655(14) 0.0243(5) Uani 1 1 d . . . . .
 O1C O 0.52888(17) 0.58246(13) -0.16857(12) 0.0294(5) Uani 1 1 d . . . . .
 O2C O 0.60010(19) 1.14830(14) -0.39342(16) 0.0498(7) Uani 1 1 d . . . . .

loop_
  _atom_site_aniso_label
  _atom_site_aniso_U_11
  _atom_site_aniso_U_22
  _atom_site_aniso_U_33
  _atom_site_aniso_U_23
  _atom_site_aniso_U_13
  _atom_site_aniso_U_12
 C1A 0.0245(15) 0.0222(15) 0.0321(18) -0.0072(14) -0.0061(13) -0.0033(13)
 C2A 0.0209(14) 0.0235(15) 0.0307(18) -0.0090(13) -0.0013(13) -0.0050(12)
 C3A 0.0229(15) 0.0296(16) 0.0300(18) -0.0081(14) -0.0053(13) 0.0014(13)
 C4A 0.0312(17) 0.0235(15) 0.0289(18) -0.0050(13) -0.0010(14) 0.0007(14)
 C5A 0.0275(16) 0.0215(15) 0.0320(18) -0.0040(13) 0.0017(13) -0.0084(13)
 C6A 0.0241(15) 0.0178(14) 0.0243(17) -0.0057(12) 0.0008(12) -0.0026(12)
 C7A 0.0227(15) 0.0222(15) 0.0288(17) -0.0080(13) -0.0009(13) -0.0048(12)
 C8A 0.0238(15) 0.0209(14) 0.0221(16) -0.0059(12) -0.0044(12) -0.0073(12)
 C9A 0.0268(15) 0.0231(15) 0.0241(17) -0.0086(13) 0.0024(13) -0.0047(13)
 C10A 0.0312(16) 0.0203(14) 0.0263(17) -0.0075(13) -0.0001(13) -0.0030(13)
 C11A 0.0277(16) 0.0254(16) 0.0301(18) -0.0094(14) 0.0039(13) -0.0030(13)
 C12A 0.0269(15) 0.0214(15) 0.0314(18) -0.0096(13) 0.0010(13) 0.0007(13)
 C13A 0.0264(15) 0.0235(15) 0.0288(18) -0.0045(13) 0.0013(13) -0.0067(13)
 C14A 0.0317(17) 0.0242(15) 0.0354(19) -0.0073(14) -0.0026(14) -0.0045(13)
 C15A 0.0293(16) 0.0221(15) 0.037(2) -0.0051(14) -0.0016(14) -0.0024(13)
 C16A 0.0272(16) 0.0243(15) 0.0299(18) -0.0087(14) -0.0007(13) -0.0059(13)
 C17A 0.0284(16) 0.0266(16) 0.0262(18) -0.0068(13) -0.0031(13) -0.0007(13)
 C18A 0.0341(17) 0.0280(17) 0.039(2) -0.0125(15) 0.0003(15) -0.0046(14)
 C19A 0.047(2) 0.0262(17) 0.048(2) -0.0105(16) 0.0034(17) -0.0019(16)
 C20A 0.061(2) 0.0189(17) 0.052(2) 0.0005(16) 0.0087(19) -0.0129(17)
 C21A 0.049(2) 0.0320(19) 0.054(3) 0.0030(17) 0.0170(18) -0.0043(17)
 C22A 0.043(2) 0.0263(17) 0.044(2) -0.0030(16) 0.0071(16) 0.0009(15)
 F1A 0.0937(18) 0.0309(12) 0.097(2) -0.0016(12) 0.0350(15) -0.0178(12)
 N1A 0.0233(13) 0.0187(12) 0.0284(15) -0.0047(11) -0.0047(11) -0.0036(10)
 N2A 0.0248(13) 0.0243(13) 0.0320(15) -0.0045(11) -0.0074(11) -0.0090(11)
 N3A 0.0250(12) 0.0190(12) 0.0269(14) -0.0073(11) 0.0023(10) -0.0031(10)
 O1A 0.0313(11) 0.0250(11) 0.0379(14) -0.0044(10) -0.0145(10) -0.0046(9)
 O2A 0.0275(12) 0.0273(12) 0.0676(18) -0.0120(11) 0.0026(11) -0.0050(10)
 C1B 0.0224(15) 0.0222(15) 0.0255(17) -0.0092(13) 0.0022(13) -0.0036(13)
 C2B 0.0254(15) 0.0230(15) 0.0338(19) -0.0083(14) -0.0019(13) -0.0082(13)
 C3B 0.0299(16) 0.0306(17) 0.0299(18) -0.0083(14) -0.0087(14) -0.0003(14)
 C4B 0.0352(17) 0.0243(16) 0.0287(18) -0.0051(14) -0.0034(14) -0.0037(14)
 C5B 0.0308(16) 0.0249(15) 0.0259(17) -0.0081(13) 0.0024(13) -0.0087(13)
 C6B 0.0237(15) 0.0195(14) 0.0210(16) -0.0082(12) -0.0010(12) -0.0014(12)
 C7B 0.0227(14) 0.0230(15) 0.0230(16) -0.0089(13) -0.0011(12) -0.0036(12)
 C8B 0.0242(15) 0.0178(14) 0.0265(17) -0.0082(13) 0.0004(12) -0.0093(12)
 C9B 0.0276(15) 0.0235(15) 0.0287(18) -0.0088(13) 0.0020(13) -0.0045(13)
 C10B 0.0336(17) 0.0206(15) 0.0338(19) -0.0104(14) 0.0024(14) -0.0028(13)
 C11B 0.0302(16) 0.0233(15) 0.0306(18) -0.0082(13) 0.0044(13) -0.0027(13)
 C12B 0.0347(17) 0.0185(14) 0.0326(18) -0.0102(13) 0.0035(14) -0.0039(13)
 C13B 0.0318(16) 0.0229(15) 0.0316(18) -0.0091(14) 0.0038(13) -0.0085(13)
 C14B 0.0371(17) 0.0242(15) 0.0322(19) -0.0070(14) 0.0061(14) -0.0053(14)
 C15B 0.0312(17) 0.0295(17) 0.037(2) -0.0088(15) 0.0051(14) -0.0016(14)
 C16B 0.0336(18) 0.0285(16) 0.0232(17) -0.0110(14) 0.0046(13) -0.0029(14)
 C17B 0.0300(16) 0.0249(15) 0.0225(17) -0.0122(13) 0.0025(13) -0.0042(13)
 C18B 0.0349(17) 0.0310(17) 0.0247(18) -0.0117(14) -0.0015(14) -0.0011(14)
 C19B 0.049(2) 0.0255(16) 0.0278(19) -0.0116(14) -0.0020(15) -0.0011(15)
 C20B 0.049(2) 0.0284(17) 0.0290(19) -0.0089(15) 0.0030(15) -0.0174(16)
 C21B 0.0352(18) 0.0390(19) 0.040(2) -0.0137(16) 0.0076(15) -0.0105(16)
 C22B 0.0378(18) 0.0249(16) 0.0299(19) -0.0078(14) 0.0010(14) -0.0030(14)
 F1B 0.0665(14) 0.0337(11) 0.0556(14) -0.0059(10) -0.0010(11) -0.0236(10)
 N1B 0.0222(12) 0.0204(12) 0.0254(14) -0.0061(11) -0.0013(10) -0.0054(10)
 N2B 0.0191(12) 0.0272(13) 0.0303(15) -0.0075(11) -0.0011(11) -0.0080(10)
 N3B 0.0289(13) 0.0184(12) 0.0282(15) -0.0065(11) 0.0052(11) -0.0053(11)
 O1B 0.0283(11) 0.0268(11) 0.0345(13) -0.0059(10) -0.0090(10) -0.0046(9)
 O2B 0.0318(12) 0.0343(12) 0.0491(15) -0.0105(11) -0.0035(11) -0.0060(10)
 C1C 0.0253(15) 0.0209(15) 0.0270(17) -0.0069(13) -0.0029(13) -0.0045(13)
 C2C 0.0277(15) 0.0209(14) 0.0293(17) -0.0113(13) -0.0034(13) -0.0036(12)
 C3C 0.0268(15) 0.0261(15) 0.0294(18) -0.0109(14) -0.0052(13) 0.0035(13)
 C4C 0.0316(17) 0.0194(15) 0.0269(18) -0.0028(13) 0.0002(13) 0.0030(13)
 C5C 0.0291(16) 0.0186(14) 0.0279(17) -0.0048(13) 0.0029(13) -0.0043(12)
 C6C 0.0239(15) 0.0189(14) 0.0195(16) -0.0050(12) -0.0004(12) -0.0016(12)
 C7C 0.0210(14) 0.0211(14) 0.0239(17) -0.0076(13) -0.0012(12) -0.0003(12)
 C8C 0.0256(15) 0.0165(14) 0.0225(16) -0.0009(12) -0.0065(12) -0.0078(12)
 C9C 0.0311(16) 0.0251(15) 0.0271(18) -0.0085(14) 0.0005(13) -0.0023(13)
 C10C 0.0354(17) 0.0192(14) 0.0248(17) -0.0063(13) -0.0023(13) -0.0024(13)
 C11C 0.0233(15) 0.0235(15) 0.0325(19) -0.0045(14) 0.0002(13) -0.0009(13)
 C12C 0.0266(15) 0.0193(14) 0.0296(18) -0.0054(13) -0.0011(13) -0.0013(12)
 C13C 0.0266(16) 0.0205(15) 0.0360(19) -0.0034(14) -0.0057(14) -0.0034(13)
 C14C 0.0309(16) 0.0178(14) 0.0368(19) -0.0056(14) -0.0036(14) -0.0055(13)
 C15C 0.0283(16) 0.0219(15) 0.0309(18) -0.0051(13) -0.0009(13) -0.0053(13)
 C16C 0.0262(17) 0.0262(16) 0.038(2) -0.0103(15) -0.0011(14) -0.0039(14)
 C17C 0.0255(16) 0.0178(14) 0.0311(18) -0.0060(13) -0.0013(13) -0.0029(12)
 C18C 0.0285(17) 0.0262(16) 0.047(2) -0.0082(15) -0.0045(15) -0.0030(14)
 C19C 0.0396(19) 0.0180(15) 0.048(2) -0.0059(15) -0.0049(16) 0.0030(14)
 C20C 0.0396(18) 0.0155(14) 0.036(2) -0.0072(14) 0.0021(15) -0.0088(14)
 C21C 0.0300(17) 0.0269(16) 0.042(2) -0.0106(15) 0.0001(14) -0.0081(14)
 C22C 0.0292(16) 0.0187(15) 0.0349(19) -0.0059(13) -0.0041(14) -0.0013(13)
 F1C 0.0486(11) 0.0198(9) 0.0641(14) -0.0096(9) 0.0025(10) -0.0095(8)
 N1C 0.0265(13) 0.0186(12) 0.0248(14) -0.0037(11) -0.0060(10) -0.0052(10)
 N2C 0.0258(13) 0.0222(13) 0.0296(15) -0.0062(11) -0.0031(11) -0.0062(11)
 N3C 0.0254(13) 0.0160(12) 0.0273(15) -0.0035(10) 0.0000(10) -0.0043(10)
 O1C 0.0279(11) 0.0281(11) 0.0288(12) -0.0053(9) -0.0077(9) -0.0078(9)
 O2C 0.0250(12) 0.0227(12) 0.089(2) -0.0072(12) -0.0067(12) -0.0043(10)

_geom_special_details
;
 All esds (except the esd in the dihedral angle between two l.s. planes)
 are estimated using the full covariance matrix.  The cell esds are taken
 into account individually in the estimation of esds in distances, angles
 and torsion angles; correlations between esds in cell parameters are only
 used when they are defined by crystal symmetry.  An approximate (isotropic)
 treatment of cell esds is used for estimating esds involving l.s. planes.
;
loop_
  _geom_bond_atom_site_label_1
  _geom_bond_atom_site_label_2
  _geom_bond_distance
  _geom_bond_site_symmetry_2
  _geom_bond_publ_flag
 C1A N1A 1.374(3) . ?
 C1A N2A 1.365(4) . ?
 C1A O1A 1.243(3) . ?
 C2A C3A 1.397(4) . ?
 C2A C6A 1.386(4) . ?
 C3A C4A 1.392(4) . ?
 C4A C5A 1.389(4) . ?
 C5A C7A 1.376(4) . ?
 C6A C7A 1.393(4) . ?
 C6A N1A 1.404(3) . ?
 C7A N2A 1.391(3) . ?
 C8A C9A 1.511(4) . ?
 C8A C12A 1.516(4) . ?
 C8A N1A 1.475(3) . ?
 C9A C10A 1.521(4) . ?
 C10A N3A 1.454(4) . ?
 C11A C12A 1.524(4) . ?
 C11A N3A 1.468(3) . ?
 C13A C14A 1.520(4) . ?
 C13A N3A 1.469(4) . ?
 C14A C15A 1.517(4) . ?
 C15A C16A 1.511(4) . ?
 C16A C17A 1.492(4) . ?
 C16A O2A 1.219(3) . ?
 C17A C18A 1.397(4) . ?
 C17A C22A 1.382(4) . ?
 C18A C19A 1.379(4) . ?
 C19A C20A 1.357(5) . ?
 C20A C21A 1.376(5) . ?
 C20A F1A 1.368(4) . ?
 C21A C22A 1.391(5) . ?
 C1B N1B 1.385(3) . ?
 C1B N2B 1.364(4) . ?
 C1B O1B 1.248(3) . ?
 C2B C3B 1.390(4) . ?
 C2B C6B 1.383(4) . ?
 C3B C4B 1.378(4) . ?
 C4B C5B 1.391(4) . ?
 C5B C7B 1.381(4) . ?
 C6B C7B 1.389(4) . ?
 C6B N1B 1.403(3) . ?
 C7B N2B 1.385(3) . ?
 C8B C9B 1.525(4) . ?
 C8B C12B 1.519(4) . ?
 C8B N1B 1.470(3) . ?
 C9B C10B 1.525(4) . ?
 C10B N3B 1.462(4) . ?
 C11B C12B 1.513(4) . ?
 C11B N3B 1.467(3) . ?
 C13B C14B 1.521(4) . ?
 C13B N3B 1.469(4) . ?
 C14B C15B 1.527(4) . ?
 C15B C16B 1.504(4) . ?
 C16B C17B 1.496(4) . ?
 C16B O2B 1.216(3) . ?
 C17B C18B 1.394(4) . ?
 C17B C22B 1.387(4) . ?
 C18B C19B 1.376(4) . ?
 C19B C20B 1.369(4) . ?
 C20B C21B 1.371(4) . ?
 C20B F1B 1.371(4) . ?
 C21B C22B 1.392(4) . ?
 C1C N1C 1.377(3) . ?
 C1C N2C 1.374(3) . ?
 C1C O1C 1.237(3) . ?
 C2C C3C 1.384(4) . ?
 C2C C6C 1.381(4) . ?
 C3C C4C 1.383(4) . ?
 C4C C5C 1.394(4) . ?
 C5C C7C 1.378(4) . ?
 C6C C7C 1.392(4) . ?
 C6C N1C 1.396(3) . ?
 C7C N2C 1.394(3) . ?
 C8C C9C 1.518(4) . ?
 C8C C12C 1.509(4) . ?
 C8C N1C 1.477(3) . ?
 C9C C10C 1.517(4) . ?
 C10C N3C 1.461(4) . ?
 C11C C12C 1.514(4) . ?
 C11C N3C 1.458(3) . ?
 C13C C14C 1.517(4) . ?
 C13C N3C 1.473(4) . ?
 C14C C15C 1.520(4) . ?
 C15C C16C 1.498(4) . ?
 C16C C17C 1.489(4) . ?
 C16C O2C 1.219(3) . ?
 C17C C18C 1.395(4) . ?
 C17C C22C 1.391(4) . ?
 C18C C19C 1.377(4) . ?
 C19C C20C 1.370(4) . ?
 C20C C21C 1.364(4) . ?
 C20C F1C 1.360(3) . ?
 C21C C22C 1.384(4) . ?

loop_
  _geom_angle_atom_site_label_1
  _geom_angle_atom_site_label_2
  _geom_angle_atom_site_label_3
  _geom_angle
  _geom_angle_site_symmetry_1
  _geom_angle_site_symmetry_3
  _geom_angle_publ_flag
 N2A C1A N1A 107.3(2) . . ?
 O1A C1A N1A 127.1(3) . . ?
 O1A C1A N2A 125.6(3) . . ?
 C6A C2A C3A 116.4(3) . . ?
 C4A C3A C2A 121.9(3) . . ?
 C5A C4A C3A 121.0(3) . . ?
 C7A C5A C4A 117.3(3) . . ?
 C2A C6A C7A 121.6(2) . . ?
 C2A C6A N1A 131.0(3) . . ?
 C7A C6A N1A 107.4(2) . . ?
 C5A C7A C6A 121.8(2) . . ?
 C5A C7A N2A 131.8(3) . . ?
 N2A C7A C6A 106.4(2) . . ?
 C9A C8A C12A 110.7(2) . . ?
 N1A C8A C9A 112.9(2) . . ?
 N1A C8A C12A 111.5(2) . . ?
 C8A C9A C10A 109.5(2) . . ?
 N3A C10A C9A 111.1(2) . . ?
 N3A C11A C12A 111.0(2) . . ?
 C8A C12A C11A 110.4(2) . . ?
 N3A C13A C14A 112.0(2) . . ?
 C15A C14A C13A 112.5(2) . . ?
 C16A C15A C14A 113.7(2) . . ?
 C17A C16A C15A 119.2(3) . . ?
 O2A C16A C15A 120.9(3) . . ?
 O2A C16A C17A 119.9(3) . . ?
 C18A C17A C16A 117.9(3) . . ?
 C22A C17A C16A 123.1(3) . . ?
 C22A C17A C18A 119.0(3) . . ?
 C19A C18A C17A 120.9(3) . . ?
 C20A C19A C18A 118.2(3) . . ?
 C19A C20A C21A 123.4(3) . . ?
 C19A C20A F1A 118.2(3) . . ?
 F1A C20A C21A 118.4(3) . . ?
 C20A C21A C22A 117.9(3) . . ?
 C17A C22A C21A 120.6(3) . . ?
 C1A N1A C6A 108.7(2) . . ?
 C1A N1A C8A 126.4(2) . . ?
 C6A N1A C8A 124.6(2) . . ?
 C1A N2A C7A 110.2(2) . . ?
 C10A N3A C11A 110.2(2) . . ?
 C10A N3A C13A 112.1(2) . . ?
 C11A N3A C13A 111.0(2) . . ?
 N2B C1B N1B 107.3(2) . . ?
 O1B C1B N1B 127.1(3) . . ?
 O1B C1B N2B 125.6(3) . . ?
 C6B C2B C3B 117.0(3) . . ?
 C4B C3B C2B 121.9(3) . . ?
 C3B C4B C5B 121.3(3) . . ?
 C7B C5B C4B 116.6(3) . . ?
 C2B C6B C7B 120.9(2) . . ?
 C2B C6B N1B 131.5(3) . . ?
 C7B C6B N1B 107.6(2) . . ?
 C5B C7B C6B 122.3(2) . . ?
 C5B C7B N2B 130.9(3) . . ?
 N2B C7B C6B 106.8(2) . . ?
 C12B C8B C9B 109.3(2) . . ?
 N1B C8B C9B 115.2(2) . . ?
 N1B C8B C12B 112.4(2) . . ?
 C8B C9B C10B 109.6(2) . . ?
 N3B C10B C9B 111.6(2) . . ?
 N3B C11B C12B 110.6(2) . . ?
 C11B C12B C8B 110.2(2) . . ?
 N3B C13B C14B 112.1(2) . . ?
 C13B C14B C15B 114.0(2) . . ?
 C16B C15B C14B 115.6(3) . . ?
 C17B C16B C15B 118.4(3) . . ?
 O2B C16B C15B 121.2(3) . . ?
 O2B C16B C17B 120.4(3) . . ?
 C18B C17B C16B 118.9(3) . . ?
 C22B C17B C16B 122.4(2) . . ?
 C22B C17B C18B 118.8(3) . . ?
 C19B C18B C17B 121.5(3) . . ?
 C20B C19B C18B 117.7(3) . . ?
 C19B C20B C21B 123.5(3) . . ?
 C19B C20B F1B 118.7(3) . . ?
 C21B C20B F1B 117.8(3) . . ?
 C20B C21B C22B 118.0(3) . . ?
 C17B C22B C21B 120.6(3) . . ?
 C1B N1B C6B 108.0(2) . . ?
 C1B N1B C8B 129.1(2) . . ?
 C6B N1B C8B 122.4(2) . . ?
 C1B N2B C7B 110.0(2) . . ?
 C10B N3B C11B 109.0(2) . . ?
 C10B N3B C13B 111.3(2) . . ?
 C11B N3B C13B 111.5(2) . . ?
 N2C C1C N1C 106.7(2) . . ?
 O1C C1C N1C 126.8(3) . . ?
 O1C C1C N2C 126.5(3) . . ?
 C6C C2C C3C 117.3(3) . . ?
 C4C C3C C2C 121.5(3) . . ?
 C3C C4C C5C 121.2(3) . . ?
 C7C C5C C4C 117.2(3) . . ?
 C2C C6C C7C 121.4(2) . . ?
 C2C C6C N1C 131.1(3) . . ?
 C7C C6C N1C 107.5(2) . . ?
 C5C C7C C6C 121.4(2) . . ?
 C5C C7C N2C 132.0(3) . . ?
 C6C C7C N2C 106.5(2) . . ?
 C12C C8C C9C 110.8(2) . . ?
 N1C C8C C9C 113.3(2) . . ?
 N1C C8C C12C 112.6(2) . . ?
 C10C C9C C8C 109.2(2) . . ?
 N3C C10C C9C 111.0(2) . . ?
 N3C C11C C12C 111.4(2) . . ?
 C8C C12C C11C 110.0(2) . . ?
 N3C C13C C14C 112.7(2) . . ?
 C13C C14C C15C 112.4(2) . . ?
 C16C C15C C14C 113.3(2) . . ?
 C17C C16C C15C 119.6(2) . . ?
 O2C C16C C15C 121.2(3) . . ?
 O2C C16C C17C 119.2(3) . . ?
 C18C C17C C16C 118.9(3) . . ?
 C22C C17C C16C 122.8(2) . . ?
 C22C C17C C18C 118.3(3) . . ?
 C19C C18C C17C 121.4(3) . . ?
 C20C C19C C18C 117.8(3) . . ?
 C21C C20C C19C 123.4(3) . . ?
 F1C C20C C19C 118.3(2) . . ?
 F1C C20C C21C 118.3(3) . . ?
 C20C C21C C22C 118.2(3) . . ?
 C21C C22C C17C 120.9(3) . . ?
 C1C N1C C6C 109.2(2) . . ?
 C1C N1C C8C 125.5(2) . . ?
 C6C N1C C8C 125.2(2) . . ?
 C1C N2C C7C 110.1(2) . . ?
 C10C N3C C13C 111.8(2) . . ?
 C11C N3C C10C 110.3(2) . . ?
 C11C N3C C13C 110.6(2) . . ?

_shelx_res_file
;
TITL benpII
CELL 0.71069 10.8417 16.2903 17.9497 66.7233 87.0069 85.0074
ZERR 4 0.00029 0.0004 0.0005 0.0011 0.001 0.0016
LATT 1
SFAC C H F N O
UNIT 132 144 6 18 12

L.S. 100
PLAN  20
BOND
fmap 2
acta
OMIT 1 1 0
OMIT 0 1 4
OMIT 0 0 1
OMIT 1 1 1
OMIT 2 2 1
OMIT -1 1 2
OMIT 0 2 1
OMIT 2 1 2
OMIT 0 -1 1
OMIT -1 2 1
OMIT 2 0 0
OMIT 2 0 1
OMIT -1 1 0
OMIT 0 2 2
OMIT -1 0 2
OMIT 0 0 2
OMIT -1 1 1
OMIT 0 2 0
OMIT -1 -1 1
OMIT 2 1 0
OMIT 2 0 2
OMIT 1 1 2
OMIT 2 1 1
OMIT -2 0 1
OMIT 2 -1 1
OMIT 2 1 3
OMIT 1 -1 3
OMIT 0 3 1
OMIT 2 2 3
OMIT -1 3 2
OMIT -2 2 1
OMIT -1 3 1
OMIT 1 2 4
OMIT 1 -2 2
OMIT 1 -1 1
OMIT 1 0 4
OMIT 0 2 3
REM <olex2.extras>
REM <HklSrc "%.\\bnpII.hkl">
REM </olex2.extras>

WGHT    0.040100    1.696400
FVAR       0.33235
C1A   1    0.136555    0.060937    0.522489    11.00000    0.02448    0.02221 =
         0.03207   -0.00719   -0.00612   -0.00326
C2A   1    0.409969   -0.015630    0.645589    11.00000    0.02094    0.02349 =
         0.03073   -0.00900   -0.00130   -0.00503
AFIX  43
H2A   2    0.463946    0.029008    0.635886    11.00000   -1.20000
AFIX   0
C3A   1    0.437000   -0.103430    0.700775    11.00000    0.02288    0.02960 =
         0.02995   -0.00806   -0.00531    0.00142
AFIX  43
H3A   2    0.511084   -0.117622    0.728510    11.00000   -1.20000
AFIX   0
C4A   1    0.356284   -0.170302    0.715465    11.00000    0.03118    0.02353 =
         0.02890   -0.00500   -0.00103    0.00073
AFIX  43
H4A   2    0.377151   -0.227949    0.752912    11.00000   -1.20000
AFIX   0
C5A   1    0.245025   -0.152225    0.675029    11.00000    0.02751    0.02146 =
         0.03196   -0.00397    0.00170   -0.00843
AFIX  43
H5A   2    0.190432   -0.196535    0.684937    11.00000   -1.20000
AFIX   0
C6A   1    0.298304    0.001369    0.606060    11.00000    0.02413    0.01784 =
         0.02427   -0.00568    0.00078   -0.00264
C7A   1    0.218833   -0.066128    0.619728    11.00000    0.02275    0.02220 =
         0.02879   -0.00802   -0.00088   -0.00481
C8A   1    0.304042    0.165753    0.510718    11.00000    0.02377    0.02093 =
         0.02209   -0.00587   -0.00443   -0.00729
AFIX  13
H8A   2    0.369968    0.162922    0.547171    11.00000   -1.20000
AFIX   0
C9A   1    0.216052    0.245512    0.503843    11.00000    0.02684    0.02313 =
         0.02410   -0.00861    0.00238   -0.00468
AFIX  23
H9AA  2    0.183156    0.238582    0.557132    11.00000   -1.20000
H9AB  2    0.147307    0.249285    0.469875    11.00000   -1.20000
AFIX   0
C10A  1    0.284415    0.330679    0.467091    11.00000    0.03119    0.02031 =
         0.02633   -0.00749   -0.00008   -0.00303
AFIX  23
H10A  2    0.227716    0.381847    0.462453    11.00000   -1.20000
H10B  2    0.350562    0.327756    0.502612    11.00000   -1.20000
AFIX   0
C11A  1    0.425770    0.267230    0.393676    11.00000    0.02774    0.02544 =
         0.03008   -0.00936    0.00386   -0.00304
AFIX  23
H11A  2    0.493193    0.265276    0.427935    11.00000   -1.20000
H11B  2    0.460101    0.276090    0.340275    11.00000   -1.20000
AFIX   0
C12A  1    0.364676    0.178616    0.429178    11.00000    0.02691    0.02143 =
         0.03139   -0.00957    0.00100    0.00074
AFIX  23
H12A  2    0.302802    0.178098    0.392265    11.00000   -1.20000
H12B  2    0.426460    0.129617    0.435686    11.00000   -1.20000
AFIX   0
C13A  1    0.392440    0.428456    0.347435    11.00000    0.02641    0.02350 =
         0.02878   -0.00454    0.00125   -0.00672
AFIX  23
H13A  2    0.449654    0.425163    0.305152    11.00000   -1.20000
H13B  2    0.439234    0.439462    0.386755    11.00000   -1.20000
AFIX   0
C14A  1    0.295829    0.505942    0.310463    11.00000    0.03170    0.02423 =
         0.03541   -0.00727   -0.00258   -0.00452
AFIX  23
H14A  2    0.244741    0.492584    0.274473    11.00000   -1.20000
H14B  2    0.242607    0.512067    0.353388    11.00000   -1.20000
AFIX   0
C15A  1    0.353333    0.593908    0.263349    11.00000    0.02926    0.02208 =
         0.03685   -0.00506   -0.00160   -0.00236
AFIX  23
H15A  2    0.413590    0.602651    0.297143    11.00000   -1.20000
H15B  2    0.397157    0.590218    0.216132    11.00000   -1.20000
AFIX   0
C16A  1    0.260416    0.674283    0.235766    11.00000    0.02722    0.02429 =
         0.02987   -0.00866   -0.00067   -0.00585
C17A  1    0.305100    0.765153    0.189556    11.00000    0.02841    0.02660 =
         0.02616   -0.00681   -0.00313   -0.00075
C18A  1    0.231731    0.838966    0.191905    11.00000    0.03412    0.02796 =
         0.03895   -0.01247    0.00032   -0.00464
AFIX  43
H18A  2    0.157539    0.830097    0.221491    11.00000   -1.20000
AFIX   0
C19A  1    0.267773    0.924801    0.150968    11.00000    0.04708    0.02617 =
         0.04843   -0.01054    0.00342   -0.00187
AFIX  43
H19A  2    0.218440    0.973990    0.152027    11.00000   -1.20000
AFIX   0
C20A  1    0.377142    0.935570    0.109102    11.00000    0.06074    0.01886 =
         0.05188    0.00053    0.00869   -0.01294
C21A  1    0.451842    0.865566    0.103258    11.00000    0.04943    0.03198 =
         0.05399    0.00298    0.01703   -0.00427
AFIX  43
H21A  2    0.524626    0.875666    0.072189    11.00000   -1.20000
AFIX   0
C22A  1    0.415089    0.779213    0.145278    11.00000    0.04273    0.02634 =
         0.04412   -0.00302    0.00710    0.00093
AFIX  43
H22A  2    0.464925    0.730521    0.143573    11.00000   -1.20000
AFIX   0
F1A   3    0.414243    1.020587    0.069943    11.00000    0.09368    0.03086 =
         0.09713   -0.00158    0.03497   -0.01777
N1A   4    0.244863    0.080107    0.546679    11.00000    0.02332    0.01865 =
         0.02838   -0.00471   -0.00474   -0.00358
N2A   4    0.119874   -0.027203    0.568010    11.00000    0.02480    0.02432 =
         0.03204   -0.00453   -0.00735   -0.00895
AFIX  43
H2AA  2    0.057219   -0.054693    0.565124    11.00000   -1.20000
AFIX   0
N3A   4    0.336130    0.342497    0.387418    11.00000    0.02501    0.01901 =
         0.02692   -0.00733    0.00231   -0.00307
O1A   5    0.065891    0.113212    0.469261    11.00000    0.03135    0.02503 =
         0.03795   -0.00445   -0.01455   -0.00460
O2A   5    0.150661    0.666008    0.253092    11.00000    0.02753    0.02730 =
         0.06757   -0.01203    0.00263   -0.00501

C1B   1    0.690421    0.588323    0.142001    11.00000    0.02243    0.02221 =
         0.02553   -0.00920    0.00219   -0.00363
C2B   1    0.959365    0.505860    0.268739    11.00000    0.02539    0.02301 =
         0.03376   -0.00834   -0.00187   -0.00824
AFIX  43
H2B   2    1.019177    0.547130    0.256449    11.00000   -1.20000
AFIX   0
C3B   1    0.977019    0.420305    0.329021    11.00000    0.02989    0.03061 =
         0.02989   -0.00826   -0.00875   -0.00031
AFIX  43
H3B   2    1.050746    0.403979    0.357232    11.00000   -1.20000
AFIX   0
C4B   1    0.888418    0.358990    0.348179    11.00000    0.03516    0.02426 =
         0.02872   -0.00507   -0.00339   -0.00369
AFIX  43
H4B   2    0.903847    0.302307    0.388718    11.00000   -1.20000
AFIX   0
C5B   1    0.776357    0.380231    0.308064    11.00000    0.03085    0.02493 =
         0.02591   -0.00806    0.00242   -0.00869
AFIX  43
H5B   2    0.715673    0.339482    0.321342    11.00000   -1.20000
AFIX   0
C6B   1    0.848857    0.526823    0.227877    11.00000    0.02367    0.01954 =
         0.02103   -0.00823   -0.00098   -0.00135
C7B   1    0.759764    0.464880    0.247526    11.00000    0.02265    0.02297 =
         0.02299   -0.00887   -0.00113   -0.00358
C8B   1    0.876848    0.682798    0.124501    11.00000    0.02417    0.01783 =
         0.02648   -0.00821    0.00038   -0.00931
AFIX  13
H8B   2    0.923632    0.688338    0.167346    11.00000   -1.20000
AFIX   0
C9B   1    0.801833    0.772017    0.083684    11.00000    0.02760    0.02345 =
         0.02868   -0.00879    0.00201   -0.00453
AFIX  23
H9BA  2    0.745703    0.783282    0.123030    11.00000   -1.20000
H9BB  2    0.752929    0.769839    0.040851    11.00000   -1.20000
AFIX   0
C10B  1    0.889266    0.847204    0.048250    11.00000    0.03358    0.02065 =
         0.03383   -0.01036    0.00242   -0.00283
AFIX  23
H10C  2    0.841262    0.903702    0.021708    11.00000   -1.20000
H10D  2    0.934268    0.851335    0.091805    11.00000   -1.20000
AFIX   0
C11B  1    1.052611    0.747916    0.030965    11.00000    0.03024    0.02334 =
         0.03062   -0.00820    0.00440   -0.00275
AFIX  23
H11C  2    1.096545    0.751897    0.074995    11.00000   -1.20000
H11D  2    1.113445    0.738459   -0.006977    11.00000   -1.20000
AFIX   0
C12B  1    0.971838    0.669592    0.064224    11.00000    0.03467    0.01846 =
         0.03262   -0.01020    0.00351   -0.00394
AFIX  23
H12C  2    1.022986    0.614598    0.090772    11.00000   -1.20000
H12D  2    0.929806    0.664402    0.020051    11.00000   -1.20000
AFIX   0
C13B  1    1.054915    0.907769   -0.048683    11.00000    0.03182    0.02286 =
         0.03163   -0.00913    0.00382   -0.00846
AFIX  23
H13C  2    1.110946    0.909355   -0.008949    11.00000   -1.20000
H13D  2    1.002492    0.963151   -0.066875    11.00000   -1.20000
AFIX   0
C14B  1    1.129880    0.901616   -0.120583    11.00000    0.03706    0.02417 =
         0.03218   -0.00700    0.00610   -0.00527
AFIX  23
H14C  2    1.073657    0.896489   -0.158576    11.00000   -1.20000
H14D  2    1.184766    0.847454   -0.101543    11.00000   -1.20000
AFIX   0
C15B  1    1.207064    0.981520   -0.165230    11.00000    0.03124    0.02950 =
         0.03717   -0.00875    0.00512   -0.00163
AFIX  23
H15C  2    1.251479    0.993340   -0.125403    11.00000   -1.20000
H15D  2    1.268216    0.965055   -0.199262    11.00000   -1.20000
AFIX   0
C16B  1    1.135635    1.066732   -0.217314    11.00000    0.03364    0.02845 =
         0.02317   -0.01104    0.00463   -0.00288
C17B  1    1.202952    1.150372   -0.254784    11.00000    0.03000    0.02495 =
         0.02248   -0.01216    0.00254   -0.00422
C18B  1    1.134608    1.232995   -0.282573    11.00000    0.03488    0.03104 =
         0.02474   -0.01166   -0.00154   -0.00113
AFIX  43
H18B  2    1.048688    1.234637   -0.277813    11.00000   -1.20000
AFIX   0
C19B  1    1.191462    1.312177   -0.316889    11.00000    0.04853    0.02552 =
         0.02781   -0.01156   -0.00203   -0.00111
AFIX  43
H19B  2    1.145519    1.367148   -0.334869    11.00000   -1.20000
AFIX   0
C20B  1    1.318029    1.307216   -0.323641    11.00000    0.04927    0.02841 =
         0.02902   -0.00888    0.00296   -0.01744
C21B  1    1.390043    1.228030   -0.298566    11.00000    0.03518    0.03898 =
         0.04028   -0.01374    0.00765   -0.01054
AFIX  43
H21B  2    1.475753    1.227338   -0.304980    11.00000   -1.20000
AFIX   0
C22B  1    1.330949    1.148690   -0.263210    11.00000    0.03785    0.02493 =
         0.02992   -0.00783    0.00098   -0.00302
AFIX  43
H22B  2    1.377704    1.094051   -0.245070    11.00000   -1.20000
AFIX   0
F1B   3    1.376601    1.385266   -0.357759    11.00000    0.06649    0.03373 =
         0.05563   -0.00588   -0.00098   -0.02360
N1B   4    0.803238    0.604795    0.164166    11.00000    0.02218    0.02042 =
         0.02545   -0.00608   -0.00134   -0.00538
N2B   4    0.662784    0.504929    0.194953    11.00000    0.01910    0.02716 =
         0.03028   -0.00746   -0.00106   -0.00797
AFIX  43
H2BA  2    0.595095    0.480745    0.195617    11.00000   -1.20000
AFIX   0
N3B   4    0.977374    0.831902   -0.010215    11.00000    0.02889    0.01836 =
         0.02815   -0.00655    0.00520   -0.00533
O1B   5    0.624223    0.639909    0.085151    11.00000    0.02827    0.02684 =
         0.03449   -0.00592   -0.00904   -0.00455
O2B   5    1.025580    1.068342   -0.228453    11.00000    0.03178    0.03430 =
         0.04910   -0.01048   -0.00350   -0.00605
C1C   1    0.592158    0.536299   -0.108980    11.00000    0.02534    0.02094 =
         0.02699   -0.00691   -0.00287   -0.00445
C2C   1    0.841375    0.481468    0.032880    11.00000    0.02774    0.02086 =
         0.02933   -0.01130   -0.00338   -0.00364
AFIX  43
H2C   2    0.892018    0.528363    0.021532    11.00000   -1.20000
AFIX   0
C3C   1    0.863687    0.400533    0.097880    11.00000    0.02679    0.02606 =
         0.02941   -0.01091   -0.00516    0.00350
AFIX  43
H3C   2    0.931251    0.392746    0.130475    11.00000   -1.20000
AFIX   0
C4C   1    0.787775    0.330978    0.115452    11.00000    0.03159    0.01939 =
         0.02692   -0.00284    0.00019    0.00298
AFIX  43
H4C   2    0.804579    0.277747    0.160040    11.00000   -1.20000
AFIX   0
C5C   1    0.686532    0.339201    0.067553    11.00000    0.02908    0.01863 =
         0.02795   -0.00476    0.00292   -0.00433
AFIX  43
H5C   2    0.635626    0.292429    0.079016    11.00000   -1.20000
AFIX   0
C6C   1    0.740886    0.489753   -0.014425    11.00000    0.02393    0.01889 =
         0.01945   -0.00499   -0.00037   -0.00159
C7C   1    0.665111    0.419570    0.002513    11.00000    0.02101    0.02109 =
         0.02392   -0.00762   -0.00117   -0.00025
C8C   1    0.749883    0.648067   -0.122964    11.00000    0.02556    0.01646 =
         0.02247   -0.00088   -0.00654   -0.00782
AFIX  13
H8C   2    0.819437    0.646646   -0.089626    11.00000   -1.20000
AFIX   0
C9C   1    0.662620    0.727706   -0.126943    11.00000    0.03107    0.02506 =
         0.02715   -0.00851    0.00046   -0.00226
AFIX  23
H9CA  2    0.591141    0.731594   -0.158811    11.00000   -1.20000
H9CB  2    0.633881    0.720335   -0.072731    11.00000   -1.20000
AFIX   0
C10C  1    0.730354    0.812708   -0.165471    11.00000    0.03545    0.01923 =
         0.02477   -0.00626   -0.00227   -0.00241
AFIX  23
H10E  2    0.674405    0.863876   -0.169015    11.00000   -1.20000
H10F  2    0.798828    0.809906   -0.131654    11.00000   -1.20000
AFIX   0
C11C  1    0.864266    0.749178   -0.242333    11.00000    0.02334    0.02352 =
         0.03249   -0.00451    0.00022   -0.00086
AFIX  23
H11E  2    0.934025    0.746710   -0.209617    11.00000   -1.20000
H11F  2    0.895450    0.758208   -0.296449    11.00000   -1.20000
AFIX   0
C12C  1    0.803369    0.661278   -0.205907    11.00000    0.02656    0.01932 =
         0.02961   -0.00544   -0.00113   -0.00131
AFIX  23
H12E  2    0.738035    0.661460   -0.240900    11.00000   -1.20000
H12F  2    0.863974    0.612230   -0.201557    11.00000   -1.20000
AFIX   0
C13C  1    0.835553    0.909739   -0.287309    11.00000    0.02661    0.02046 =
         0.03603   -0.00343   -0.00570   -0.00337
AFIX  23
H13E  2    0.891483    0.905498   -0.329824    11.00000   -1.20000
H13F  2    0.884202    0.920024   -0.248381    11.00000   -1.20000
AFIX   0
C14C  1    0.741644    0.988854   -0.324024    11.00000    0.03091    0.01779 =
         0.03683   -0.00557   -0.00355   -0.00547
AFIX  23
H14E  2    0.683921    0.991930   -0.281902    11.00000   -1.20000
H14F  2    0.694995    0.979675   -0.364415    11.00000   -1.20000
AFIX   0
C15C  1    0.802123    1.077134   -0.363364    11.00000    0.02829    0.02188 =
         0.03092   -0.00513   -0.00086   -0.00531
AFIX  23
H15E  2    0.854566    1.083581   -0.324131    11.00000   -1.20000
H15F  2    0.854611    1.075658   -0.408332    11.00000   -1.20000
AFIX   0
C16C  1    0.710679    1.157004   -0.393891    11.00000    0.02620    0.02617 =
         0.03812   -0.01031   -0.00109   -0.00385
C17C  1    0.755245    1.248770   -0.425811    11.00000    0.02552    0.01777 =
         0.03106   -0.00597   -0.00126   -0.00286
C18C  1    0.669277    1.322331   -0.456607    11.00000    0.02853    0.02621 =
         0.04687   -0.00822   -0.00446   -0.00295
AFIX  43
H18C  2    0.585821    1.312832   -0.456048    11.00000   -1.20000
AFIX   0
C19C  1    0.705316    1.408683   -0.487808    11.00000    0.03964    0.01804 =
         0.04789   -0.00589   -0.00490    0.00297
AFIX  43
H19C  2    0.647875    1.457481   -0.509241    11.00000   -1.20000
AFIX   0
C20C  1    0.828613    1.420305   -0.486220    11.00000    0.03961    0.01547 =
         0.03638   -0.00720    0.00209   -0.00876
C21C  1    0.916553    1.351036   -0.455592    11.00000    0.02999    0.02692 =
         0.04197   -0.01064    0.00010   -0.00813
AFIX  43
H21C  2    0.999376    1.361632   -0.455168    11.00000   -1.20000
AFIX   0
C22C  1    0.879114    1.264591   -0.425181    11.00000    0.02919    0.01872 =
         0.03494   -0.00587   -0.00406   -0.00130
AFIX  43
H22C  2    0.937578    1.216413   -0.404032    11.00000   -1.20000
AFIX   0
F1C   3    0.865523    1.505288   -0.517760    11.00000    0.04859    0.01980 =
         0.06413   -0.00961    0.00249   -0.00949
N1C   4    0.694036    0.561356   -0.082580    11.00000    0.02655    0.01859 =
         0.02484   -0.00367   -0.00603   -0.00520
N2C   4    0.574726    0.449744   -0.056668    11.00000    0.02578    0.02225 =
         0.02960   -0.00616   -0.00306   -0.00620
AFIX  43
H2CA  2    0.516556    0.418717   -0.059954    11.00000   -1.20000
AFIX   0
N3C   4    0.777403    0.824327   -0.246554    11.00000    0.02545    0.01599 =
         0.02733   -0.00353   -0.00002   -0.00427
O1C   5    0.528881    0.582456   -0.168572    11.00000    0.02785    0.02809 =
         0.02875   -0.00532   -0.00772   -0.00779
O2C   5    0.600104    1.148304   -0.393422    11.00000    0.02496    0.02271 =
         0.08906   -0.00719   -0.00667   -0.00429
HKLF 4

REM  benpII
REM R1 =  0.0765 for    6787 Fo > 4sig(Fo)  and  0.1701 for all   13138 data
REM    757 parameters refined using      0 restraints

END

WGHT      0.0404      1.6566

REM Highest difference peak  0.244,  deepest hole -0.285,  1-sigma level  0.064
Q1    1   0.5738  0.7194 -0.2149  11.00000  0.05    0.24
Q2    1   0.0416  0.0555  0.4557  11.00000  0.05    0.24
Q3    1   0.8087  0.8897 -0.0105  11.00000  0.05    0.24
Q4    1   1.1633  1.1136 -0.2699  11.00000  0.05    0.24
Q5    1   0.8452  0.7778 -0.1165  11.00000  0.05    0.24
Q6    1   0.8812  1.3918 -0.5061  11.00000  0.05    0.24
Q7    1   0.7743  1.0267 -0.3518  11.00000  0.05    0.24
Q8    1   0.8896  0.4835  0.2194  11.00000  0.05    0.24
Q9    1   0.7047  0.5333 -0.0390  11.00000  0.05    0.23
Q10   1   0.9337  0.3693  0.2123  11.00000  0.05    0.23
Q11   1   0.6022  0.7601 -0.2466  11.00000  0.05    0.23
Q12   1   0.3800  0.3938  0.2700  11.00000  0.05    0.23
Q13   1   0.4313  0.5965  0.2520  11.00000  0.05    0.23
Q14   1   0.9809  0.6840  0.1883  11.00000  0.05    0.23
Q15   1   0.2243  0.6543  0.3590  11.00000  0.05    0.22
Q16   1   0.7300  0.8107 -0.0454  11.00000  0.05    0.22
Q17   1   1.5714  1.1980 -0.3027  11.00000  0.05    0.22
Q18   1   0.9353  0.9266 -0.1061  11.00000  0.05    0.22
Q19   1   1.1491  1.3795 -0.2543  11.00000  0.05    0.22
Q20   1   0.8534  0.6717 -0.0420  11.00000  0.05    0.22
;
_shelx_res_checksum               95432
_shelx_hkl_file
;
   0   0   1   -0.30    0.10
   0   0   2    0.00    0.40
   0   0  -2   -0.20    0.80
   0   0  -4   26.50    4.00
   0   0   5  653.80   24.50
   0   0  -5  645.20   26.00
   0   0   6    6.20    1.90
   0   0  -6   10.00    2.50
   0   0   7   33.50    4.20
   0   0  -7   40.90    4.50
   0   0   8   66.90    4.30
   0   0  -8   76.30    5.00
   0   0   9    0.40    2.40
   0   0  -9   -3.20    2.50
   0   0  10    3.20    3.20
   0   0 -10    2.40    3.90
   0   0  11   -0.50    2.50
   0   0 -11    2.30    2.90
   0   0  12   23.70    4.60
   0   0 -12   24.20    4.40
   0   0  13   15.90    5.10
   0   0 -13   18.20    4.80
   0   0  14   10.60    3.70
   0   0 -14   18.90    4.30
   0   0  15    5.80    4.40
   0   0 -15    0.20    3.20
   0   0 -16   24.90    5.80
   0   0 -17   12.90    4.30
   0   0 -18    0.70    3.70
   0   0 -19    5.40    7.70
   0   0 -20    0.90    5.10
   0   0 -21   -3.20    4.70
   0   1 -20    5.10    5.90
   0   1 -19    7.30    4.70
   0   1 -18   42.40    7.50
   0   1 -17    8.90    5.50
   0   1 -16    8.50    5.60
   0   1 -15   25.20    4.80
   0   1 -14   10.50    4.30
   0  -1  14   -0.20    3.60
   0   1 -13   13.70    5.70
   0  -1  13   -0.80    3.60
   0   1 -12   48.50    5.10
   0  -1  12   47.30    5.90
   0   1 -11    2.10    4.00
   0  -1  11    2.70    3.60
   0   1 -10    5.20    2.60
   0  -1  10    5.30    2.80
   0   1  -9   20.30    2.90
   0  -1   9   16.30    2.50
   0   1  -8   11.60    3.60
   0  -1   8   12.10    2.80
   0   1  -7   45.00    3.70
   0  -1   7   40.10    3.50
   0   1  -6  166.10    7.70
   0  -1   6  175.00    7.80
   0   1  -5   14.20    2.60
   0  -1   5   18.10    2.80
   0   1  -4   46.60   10.30
   0  -1   4   41.00    2.80
   0   1  -2    6.60    1.80
   0  -1   2    0.30    0.50
   0   1  -1   -0.90    0.40
   0  -1   1   -0.40    0.30
   0   1   2    0.20    0.60
   0  -1  -2   -1.00    0.70
   0   1   3    1.20    0.70
   0  -1  -3    7.40    2.10
   0   1   4   -4.90    2.40
   0   1   5 1226.70   49.80
   0  -1  -5 1226.90   53.30
   0   1   6  191.40   14.80
   0  -1  -6  177.20   10.20
   0   1   7  191.70   11.10
   0  -1  -7  190.50    8.40
   0   1   8   12.70    2.80
   0  -1  -8   10.10    2.60
   0   1   9    7.80    3.10
   0  -1  -9   13.20    2.90
   0   1  10   33.80    4.50
   0  -1 -10   26.30    4.00
   0   1  11   34.90    4.20
   0  -1 -11   37.30    5.30
   0   1  12   43.50    6.00
   0  -1 -12   52.90    6.10
   0   1  13    3.20    3.10
   0  -1 -13   -0.60    3.30
   0   1  14    3.90    4.30
   0  -1 -14    1.50    3.60
   0   1  15    1.00    3.20
   0  -1 -15   -1.10    3.20
   0  -1 -16   -4.90    5.10
   0  -1 -17   13.20    6.40
   0  -1 -18    5.20    4.10
   0  -1 -19    5.80    4.60
   0  -1 -20    5.20    8.10
   0  -1 -21   -5.30    8.10
   0   2 -20   10.10    8.30
   0   2 -19   23.70    6.50
   0   2 -18   -7.90    4.80
   0   2 -17    3.70    3.80
   0   2 -16   19.10    5.20
   0   2 -15    0.70    3.30
   0   2 -14    8.00    4.10
   0  -2  14    5.50    3.60
   0   2 -13   -0.30    3.00
   0  -2  13   -3.30    3.70
   0   2 -12    0.00    4.40
   0  -2  12    1.90    2.70
   0   2 -11    5.70    2.90
   0  -2  11    8.20    3.50
   0   2 -10    3.80    2.50
   0  -2  10   12.30    2.90
   0   2  -9   31.00    4.40
   0  -2   9   33.30    4.00
   0   2  -8   71.40    5.90
   0  -2   8   67.00    5.20
   0   2  -7    1.90    3.30
   0  -2   7    2.70    3.20
   0   2  -6    0.20    2.10
   0  -2   6   -0.20    2.40
   0   2  -5  181.30    8.90
   0  -2   5  179.50    8.90
   0   2  -4   84.70   11.50
   0  -2   4   86.10    4.30
   0  -2   3   20.20    2.10
   0   2  -1   -0.10    0.90
   0  -2   1    0.40    0.50
   0  -2   0    0.30    0.60
   0   2   1   -0.80    0.40
   0  -2  -1   -0.60    0.50
   0   2   2    0.30    0.20
   0  -2  -2   -0.40    0.40
   0  -2  -3  149.50   12.60
   0   2   5  183.60    8.00
   0  -2  -5  168.60    7.60
   0   2   6  879.90   47.10
   0  -2  -6  858.10   33.50
   0   2   7 1233.90   45.40
   0  -2  -7 1161.80   42.20
   0   2   8   41.90    3.40
   0  -2  -8   50.70    5.10
   0   2   9   28.60    4.20
   0  -2  -9   25.80    3.50
   0   2  10    3.20    2.50
   0  -2 -10   -2.50    2.90
   0   2  11  205.10   10.00
   0  -2 -11  212.20   11.00
   0   2  12    3.40    2.70
   0  -2 -12    2.20    2.70
   0   2  13   33.70    4.90
   0  -2 -13   27.70    4.00
   0   2  14    8.80    3.70
   0  -2 -14    6.00    3.20
   0   2  15    2.00    3.10
   0  -2 -15   11.00    4.60
   0  -2 -16    7.90    3.80
   0  -2 -17    8.50    6.80
   0  -2 -18    1.60    6.00
   0  -2 -19    5.30    5.10
   0  -2 -20    7.60    5.40
   0  -2 -21    4.70    5.60
   0  -2 -22    6.70    5.80
   0   3 -19   -4.70    6.80
   0   3 -18   19.90    4.80
   0   3 -17   23.10    7.80
   0   3 -16    2.20    3.90
   0   3 -15    6.10    4.10
   0   3 -14    3.80    3.80
   0   3 -13   46.40    6.30
   0  -3  13   33.50    5.20
   0   3 -12    6.50    3.50
   0  -3  12    6.80    3.50
   0   3 -11   14.70    4.70
   0  -3  11    3.50    3.10
   0   3 -10   30.10    5.00
   0  -3  10   22.20    3.40
   0   3  -9   32.70    4.40
   0  -3   9   25.60    4.40
   0   3  -8   -4.70    3.60
   0  -3   8    2.10    2.50
   0   3  -7    2.80    2.60
   0  -3   7   -3.40    3.00
   0   3  -6  175.60    9.80
   0  -3   6  161.10    7.30
   0   3  -5  116.30    7.50
   0  -3   5  113.30    6.10
   0   3  -4  196.00    9.00
   0  -3   4  179.40    7.70
   0   3  -3   45.80    4.20
   0  -3   3   59.30    4.00
   0   3  -2    2.60    1.80
   0  -3   2    2.10    1.10
   0  -3   1   -0.10    0.70
   0   3   0    3.70    1.60
   0   3   1   57.00    9.30
   0   3   5   -1.60    2.00
   0  -3  -5    1.80    2.40
   0   3   6   59.10    3.80
   0  -3  -6   45.10    4.40
   0   3   7  882.40   52.50
   0  -3  -7  888.30   52.10
   0   3   8  251.90   10.10
   0  -3  -8  246.70   10.30
   0   3   9 1103.20   42.30
   0  -3  -9 1100.60   39.70
   0   3  10  182.20   11.50
   0  -3 -10  176.80    8.80
   0   3  11    6.10    2.50
   0  -3 -11    5.10    3.00
   0   3  12  152.50    9.70
   0  -3 -12  151.50   11.30
   0   3  13   40.10    5.10
   0  -3 -13   43.90    4.50
   0   3  14    1.60    3.90
   0  -3 -14    1.00    2.90
   0   3  15    5.90    3.70
   0  -3 -15    5.60    3.40
   0  -3 -16    3.60    3.30
   0  -3 -17   -5.40    3.50
   0  -3 -18    0.90    4.10
   0  -3 -19   -4.20    4.70
   0  -3 -20    4.60    6.40
   0  -3 -21    4.90    8.40
   0  -3 -22   -8.40    9.30
   0   4 -19   13.90    6.30
   0   4 -18    3.10    5.40
   0   4 -17    4.70    6.40
   0   4 -16    9.70    4.80
   0   4 -15    4.30    4.70
   0   4 -14   43.50    6.20
   0   4 -13  132.20   10.60
   0  -4  13   91.90    8.10
   0   4 -12    1.00    3.00
   0  -4  12    0.50    3.90
   0   4 -11    7.40    3.60
   0  -4  11   -1.30    3.00
   0   4 -10   33.80    3.60
   0  -4  10   35.10    4.10
   0   4  -9    8.60    2.80
   0  -4   9    6.40    2.40
   0   4  -8   17.20    4.20
   0  -4   8   25.80    3.20
   0   4  -7    5.70    2.40
   0  -4   7    1.70    2.20
   0   4  -6   39.80    3.40
   0  -4   6   32.70    3.50
   0   4  -5  112.50    5.90
   0  -4   5  110.80    6.00
   0   4  -4   94.60    4.60
   0  -4   4   92.80    6.00
   0   4  -3  108.70    7.40
   0  -4   3  124.50    7.60
   0  -4   2    8.20    1.20
   0  -4   1   18.20    1.40
   0   4   0  242.70   10.10
   0  -4  -2    8.50    2.00
   0   4   3  168.00    6.30
   0  -4  -3  164.00    5.80
   0   4   4   79.40    3.70
   0  -4  -4   83.10    3.00
   0   4   5  268.80   11.40
   0  -4  -5  249.40    7.20
   0   4   6   97.00    5.60
   0  -4  -6   89.70    3.60
   0   4   7  122.20    5.80
   0  -4  -7  111.60    3.60
   0   4   8  556.00   21.00
   0  -4  -8  530.60   24.20
   0   4   9    3.20    2.40
   0  -4  -9    0.50    2.50
   0   4  10  433.10   26.70
   0  -4 -10  415.20   17.40
   0   4  11  451.30   17.40
   0  -4 -11  477.40   19.90
   0   4  12   51.40    5.30
   0  -4 -12   49.60    5.10
   0   4  13    3.60    3.20
   0  -4 -13   16.20    3.80
   0   4  14  224.90   15.10
   0  -4 -14  234.60   14.30
   0   4  15    8.70    4.20
   0  -4 -15   12.40    3.60
   0  -4 -16   -1.20    3.10
   0  -4 -17   16.30    4.40
   0  -4 -18   -1.50    5.30
   0  -4 -19   11.10    4.40
   0  -4 -20    1.80    5.40
   0  -4 -21    1.30    5.50
   0  -4 -22    6.50    5.50
   0   5 -18    0.30    6.90
   0   5 -17    6.80    4.70
   0   5 -16   -4.80    5.00
   0   5 -15   82.50    9.20
   0   5 -14   64.00    7.80
   0   5 -13   24.30    4.80
   0   5 -12  253.30   15.80
   0  -5  12  206.10   17.10
   0   5 -11    3.10    3.20
   0  -5  11   12.40    3.60
   0   5 -10   59.20    5.10
   0  -5  10   49.20    5.20
   0   5  -9   62.40    6.70
   0  -5   9   62.10    5.30
   0   5  -8    9.50    2.90
   0  -5   8   13.20    3.90
   0   5  -7  105.30    8.60
   0  -5   7  117.40    7.00
   0   5  -6  208.20    9.50
   0  -5   6  211.20   11.20
   0   5  -5    7.10    2.30
   0  -5   5   14.30    3.40
   0   5  -4  105.60    6.50
   0  -5   4   95.80    7.90
   0  -5   3   91.20    4.20
   0  -5   2   24.00    1.80
   0  -5   1   22.00    2.00
   0   5   0    8.70    2.30
   0  -5   0   10.90    1.90
   0   5   1   -3.80    1.80
   0  -5  -1   -0.60    2.50
   0   5   2   11.80    4.80
   0  -5  -2   16.50    1.90
   0   5   3    6.50    1.40
   0  -5  -3    0.30    2.10
   0   5   4  901.10   21.20
   0  -5  -4  879.30   41.70
   0   5   5   25.10    1.50
   0  -5  -5   21.00    1.80
   0   5   6    5.80    2.00
   0  -5  -6    6.70    1.00
   0   5   7  310.50   11.30
   0  -5  -7  275.90   13.30
   0   5   8   15.60    2.80
   0  -5  -8   11.60    0.80
   0   5   9  163.90    8.40
   0  -5  -9  178.20    5.60
   0   5  10   56.80    4.50
   0  -5 -10   58.80    5.80
   0   5  11  409.10   26.40
   0  -5 -11  394.50   17.90
   0   5  12  235.00   10.80
   0  -5 -12  246.40   12.40
   0   5  13   76.00    5.60
   0  -5 -13   77.30    6.60
   0   5  14   48.60    5.40
   0  -5 -14   42.50    5.50
   0   5  15   14.40    4.70
   0  -5 -15   25.20    5.60
   0  -5 -16   28.10    5.60
   0  -5 -17    9.20    4.40
   0  -5 -18   10.50    5.20
   0  -5 -19    6.70    4.20
   0  -5 -20   19.10    5.70
   0  -5 -21   -2.90    5.70
   0  -5 -22    9.10    7.80
   0   6 -17   -2.00    4.70
   0   6 -16   13.90    5.00
   0   6 -15    7.70    5.80
   0   6 -14   60.70    7.90
   0   6 -13    4.00    4.00
   0   6 -12    8.30    3.70
   0  -6  12   -2.70    3.20
   0   6 -11   13.20    4.70
   0  -6  11   18.10    6.30
   0   6 -10   22.40    3.90
   0  -6  10   45.20    5.20
   0   6  -9   -1.20    2.90
   0  -6   9    1.60    4.40
   0   6  -8   13.80    4.00
   0  -6   8    6.50    2.80
   0   6  -7   19.20    4.20
   0  -6   7    8.00    3.00
   0   6  -6    2.00    3.20
   0  -6   6    2.80    2.00
   0   6  -5   34.80    3.30
   0  -6   5   30.80    3.90
   0  -6   4   49.80    2.90
   0  -6   3   61.60    2.90
   0  -6   2   89.10    3.70
   0  -6   1    5.30    1.80
   0   6   0  169.40    8.20
   0  -6   0  169.40    8.10
   0  -6  -1    3.00    2.60
   0   6   2   45.10    3.10
   0  -6  -2   44.60    2.20
   0   6   3  104.70    5.80
   0  -6  -3  110.50    5.40
   0   6   4   44.50    1.70
   0  -6  -4   46.30    3.00
   0   6   5    1.00    0.80
   0  -6  -5   -2.60    2.10
   0   6   6  468.90   11.70
   0  -6  -6  470.30   14.20
   0   6   7   47.40    2.50
   0  -6  -7   44.30    2.20
   0   6   8   43.70    5.00
   0  -6  -8   39.40    1.90
   0   6   9   52.60    4.20
   0  -6  -9   50.70    4.30
   0   6  10   37.40    3.80
   0  -6 -10   39.90    4.80
   0   6  11   37.50    4.10
   0  -6 -11   35.70    1.60
   0   6  12    8.00    4.60
   0  -6 -12    4.90    1.00
   0   6  13   -4.30    2.80
   0  -6 -13    2.40    3.00
   0   6  14   70.20    7.30
   0  -6 -14   61.70    7.30
   0   6  15  273.40   20.40
   0  -6 -15  244.70   17.90
   0  -6 -16   34.40    5.30
   0  -6 -17    2.90    4.60
   0  -6 -18    3.50    4.00
   0  -6 -19   20.40    7.10
   0  -6 -20    0.70    7.30
   0  -6 -21   11.30    7.10
   0  -6 -22   20.30    9.00
   0  -6 -23    8.60    8.60
   0   7 -17   -4.30    5.00
   0   7 -16    2.20    4.80
   0   7 -15   67.60    7.90
   0   7 -14    3.50    5.20
   0   7 -13   10.60    5.50
   0   7 -12  390.40   18.40
   0   7 -11   73.80    7.30
   0  -7  11   63.90    6.90
   0   7 -10    7.90    3.00
   0  -7  10    5.60    5.20
   0   7  -9   34.20    5.50
   0  -7   9   26.20    4.00
   0   7  -8   12.30    3.10
   0  -7   8   16.00    3.50
   0   7  -7    6.60    3.00
   0  -7   7    3.50    2.40
   0   7  -6   18.70    2.70
   0  -7   6   11.20    2.10
   0  -7   5   -1.70    2.10
   0  -7   4  127.20    5.30
   0  -7   3  396.20   13.60
   0  -7   2   31.90    2.30
   0  -7   1   16.00    1.70
   0   7   0   73.70    4.30
   0  -7   0   73.80    4.20
   0   7   1   28.60    2.80
   0  -7  -1   27.40    3.10
   0   7   2   32.60    3.40
   0  -7  -2   24.10    2.20
   0   7   3   20.90    3.00
   0  -7  -3   21.00    2.20
   0   7   4   61.70    3.40
   0  -7  -4   68.10    3.50
   0   7   5   60.70    2.60
   0  -7  -5   68.10    4.10
   0   7   6    0.40    0.80
   0  -7  -6    5.20    2.70
   0   7   7   44.10    1.70
   0  -7  -7   40.00    3.70
   0   7   8   70.10    3.20
   0  -7  -8   71.90    2.90
   0   7   9   25.20    3.20
   0  -7  -9   22.50    1.60
   0   7  10    5.80    3.80
   0  -7 -10    4.60    1.30
   0   7  11    7.10    3.90
   0  -7 -11   18.40    3.80
   0   7  12   -1.00    3.70
   0  -7 -12    6.50    2.90
   0   7  13   11.00    3.40
   0  -7 -13   10.60    4.60
   0   7  14   63.70    7.60
   0  -7 -14   60.20    2.30
   0   7  15    9.80    3.80
   0  -7 -15   10.60    1.20
   0  -7 -16   13.40    1.80
   0  -7 -17   12.40    1.30
   0  -7 -18   46.90    3.00
   0  -7 -19   -1.30    4.40
   0  -7 -20   10.70    6.50
   0  -7 -21    3.50    6.00
   0  -7 -22    0.40    5.80
   0  -7 -23   42.60   10.10
   0   8 -16   -1.80    6.60
   0   8 -15   -1.20    6.90
   0   8 -14   58.90    7.30
   0   8 -13   26.50    6.60
   0   8 -12   -0.10    4.60
   0   8 -11   49.80    6.10
   0  -8  11   22.90    6.90
   0   8 -10   45.70    4.30
   0  -8  10   43.00    5.60
   0   8  -9   90.70    7.30
   0  -8   9   97.40    8.60
   0   8  -8   23.20    3.50
   0  -8   8   24.50    3.60
   0  -8   7   56.20    3.80
   0  -8   6    8.10    2.80
   0  -8   5   -0.90    1.60
   0  -8   4    1.50    2.20
   0  -8   3   22.70    2.50
   0  -8   2   15.20    2.10
   0  -8   1   -0.30    2.70
   0   8   0   30.00    3.70
   0  -8   0   46.90    3.20
   0   8   1  137.20    7.10
   0  -8  -1  111.60    6.20
   0   8   2    0.30    1.50
   0  -8  -2    0.70    1.50
   0   8   3   58.20    4.20
   0  -8  -3   65.50    3.20
   0   8   4   22.50    1.90
   0  -8  -4   18.60    1.80
   0   8   5   15.40    1.60
   0  -8  -5   19.00    1.80
   0   8   6   21.50    1.50
   0  -8  -6   19.10    3.60
   0   8   7   26.40    2.10
   0  -8  -7   30.70    3.00
   0   8   8    1.20    0.80
   0  -8  -8    8.90    3.10
   0   8   9   -0.60    1.60
   0  -8  -9    0.80    1.10
   0   8  10   12.20    1.80
   0  -8 -10   11.60    1.50
   0   8  11  254.80   14.50
   0  -8 -11  247.30    8.20
   0   8  12   -0.20    3.00
   0  -8 -12    5.40    1.10
   0   8  13   40.20    5.00
   0  -8 -13   44.30    4.30
   0   8  14  148.30   13.40
   0  -8 -14  155.90   10.80
   0   8  15   36.70    5.90
   0  -8 -15   55.60    6.50
   0  -8 -16   24.70    5.40
   0  -8 -17   -1.00    5.60
   0  -8 -18  104.90   12.00
   0  -8 -19   15.20    4.70
   0  -8 -20   -1.50    5.10
   0  -8 -21    5.50    5.60
   0  -8 -22    7.70    6.00
   0  -8 -23   14.60    6.90
   0   9 -15    6.90    5.10
   0  -9  15   -3.90    6.70
   0   9 -14   -1.20    4.90
   0  -9  14   -3.90    5.90
   0  -9  13    2.50    6.00
   0  -9  12   58.90    8.20
   0  -9  11   -2.70    3.10
   0  -9  10    1.50    2.40
   0  -9   9   39.50    3.60
   0  -9   8  157.60    7.60
   0  -9   7   13.90    3.10
   0  -9   6   93.20    5.50
   0  -9   5  214.60    6.90
   0  -9   4   50.90    3.40
   0  -9   3    1.60    2.20
   0  -9   2    3.80    1.70
   0  -9   1   87.20    3.80
   0   9   0   12.20    2.60
   0  -9   0   14.50    3.00
   0   9   1   41.00    3.40
   0  -9  -1   41.00    4.20
   0   9   2   14.40    2.40
   0  -9  -2   11.20    1.70
   0   9   3   10.50    3.00
   0  -9  -3    3.90    2.40
   0   9   4   10.50    3.10
   0  -9  -4    9.60    1.80
   0   9   5   58.80    2.80
   0  -9  -5   66.50    3.80
   0   9   6   21.30    1.70
   0  -9  -6   20.00    2.10
   0   9   7   37.80    1.90
   0  -9  -7   36.80    3.50
   0   9   8    0.20    0.90
   0  -9  -8    3.50    6.00
   0   9   9   72.10    2.70
   0  -9  -9   68.20    4.90
   0   9  10  162.90    7.10
   0  -9 -10  142.50    9.00
   0   9  11    2.20    1.70
   0  -9 -11    2.20    1.20
   0   9  12    8.90    1.80
   0  -9 -12    8.50    1.50
   0   9  13   39.70    5.60
   0  -9 -13   51.10    2.80
   0   9  14   -8.30    4.50
   0  -9 -14    0.60    1.30
   0   9  15   57.60    5.90
   0  -9 -15   60.30    3.90
   0  -9 -16    1.20    3.50
   0  -9 -17   15.30    4.20
   0  -9 -18    4.10    5.20
   0  -9 -19   19.50    7.20
   0  -9 -20    4.30    4.90
   0  -9 -21   -3.20    5.20
   0  -9 -22   -0.30    4.80
   0  -9 -23    7.20    7.30
   0 -10  14    7.60    4.60
   0 -10  13   -1.70    6.30
   0 -10  12   -0.10    5.50
   0 -10  11   -3.50    3.60
   0 -10  10   13.90    4.70
   0 -10   9    3.20    2.50
   0 -10   8  135.10    8.00
   0 -10   7  145.30    7.60
   0 -10   6  400.30   15.70
   0 -10   5   47.40    3.30
   0 -10   4   36.00    3.40
   0 -10   3   45.30    3.10
   0 -10   2   47.20    3.10
   0 -10   1    2.90    1.90
   0  10   0   45.50    4.00
   0 -10   0   36.40    2.70
   0  10   1    5.90    2.90
   0 -10  -1    2.80    2.30
   0  10   2    4.50    3.00
   0 -10  -2    6.30    1.70
   0  10   3   88.40    6.00
   0 -10  -3   77.80    4.00
   0  10   4   40.30    3.50
   0 -10  -4   50.30    3.20
   0  10   5   12.70    1.90
   0 -10  -5   12.00    2.10
   0  10   6  238.40    9.00
   0 -10  -6  242.60    9.30
   0  10   7    1.90    1.50
   0 -10  -7    0.40    3.40
   0  10   8  142.90    6.60
   0 -10  -8  136.90    7.70
   0  10   9   -1.40    0.90
   0 -10  -9    4.70    3.90
   0  10  10   11.90    1.10
   0 -10 -10   17.90    4.60
   0  10  11   20.20    2.50
   0 -10 -11   20.50    4.90
   0  10  12    0.90    1.90
   0 -10 -12    6.10    4.50
   0  10  13    6.60    2.10
   0 -10 -13    9.00    1.30
   0  10  14    4.50    2.40
   0 -10 -14    2.70    1.20
   0  10  15   60.80    4.60
   0 -10 -15   65.00    3.90
   0 -10 -16    1.10    1.50
   0 -10 -17   21.30    2.30
   0 -10 -18    2.90    1.50
   0 -10 -19    2.10    1.80
   0 -10 -20   28.60    6.40
   0 -10 -21   -0.90    5.60
   0 -10 -22    3.00    5.50
   0 -10 -23   -8.90    6.80
   0 -11  13   -7.90    4.00
   0 -11  12   -0.50    6.20
   0 -11  11    0.00    3.70
   0 -11  10   14.90    4.20
   0 -11   9    0.80    3.20
   0 -11   8    3.10    2.60
   0 -11   7   11.80    3.50
   0 -11   6   69.00    4.80
   0 -11   5  229.60    9.50
   0 -11   4  119.70    5.50
   0 -11   3  107.20    4.50
   0 -11   2   20.20    2.60
   0 -11   1   25.50    3.00
   0 -11   0   51.20    3.10
   0  11   1   13.00    3.30
   0 -11  -1   13.70    2.50
   0  11   2    0.30    2.20
   0 -11  -2   -1.20    2.30
   0  11   3    3.40    3.00
   0 -11  -3    3.20    3.40
   0  11   4   19.80    3.30
   0 -11  -4   16.90    2.70
   0  11   5  107.70    4.70
   0 -11  -5  103.90    4.30
   0  11   6   31.30    2.50
   0 -11  -6   26.00    2.50
   0  11   7    9.00    1.70
   0 -11  -7   11.00    3.60
   0  11   8    6.00    1.50
   0 -11  -8    1.90    2.80
   0  11   9    0.10    1.00
   0 -11  -9    1.00    3.80
   0  11  10   13.50    1.30
   0 -11 -10   19.80    4.40
   0  11  11    0.30    1.30
   0 -11 -11   -2.40    4.60
   0  11  12    7.50    2.00
   0 -11 -12    7.80    3.70
   0  11  13   -0.70    2.40
   0 -11 -13    3.60    3.50
   0  11  14   23.80    2.70
   0 -11 -14   24.80    5.30
   0  11  15    5.60    2.50
   0 -11 -15    8.80    4.00
   0  11  16   23.90    3.20
   0 -11 -16   26.10    2.60
   0  11  17    7.40    2.50
   0 -11 -17   13.20    1.50
   0  11  18   22.20    4.00
   0 -11 -18   30.20    2.20
   0 -11 -19   -2.50    1.60
   0 -11 -20    9.10    5.60
   0 -11 -21    5.40    6.10
   0 -11 -22    5.70    6.00
   0 -11 -23    7.60    7.00
   0 -12  12    0.20    5.90
   0 -12  11   -2.70    5.40
   0 -12  10   -3.30    3.90
   0 -12   9    0.90    4.70
   0 -12   8   14.60    5.30
   0 -12   7    5.40    3.20
   0 -12   6    1.30    2.90
   0 -12   5   -2.00    3.00
   0 -12   4   74.00    4.00
   0 -12   3    2.50    2.60
   0 -12   2    5.90    2.30
   0 -12   1  522.80   16.30
   0 -12   0 1221.10   43.30
   0  12   1 1088.70   64.80
   0 -12  -1 1165.40   39.40
   0  12   2   -2.40    3.40
   0 -12  -2    2.90    1.80
   0  12   3   49.80    4.40
   0 -12  -3   45.00    3.50
   0  12   4  163.80   10.00
   0 -12  -4  184.80    6.40
   0  12   5   26.60    2.50
   0 -12  -5   32.80    2.60
   0  12   6   50.40    3.20
   0 -12  -6   50.00    3.50
   0  12   7    1.60    1.70
   0 -12  -7    0.30    1.80
   0  12   8   43.00    3.30
   0 -12  -8   47.70    4.00
   0  12   9   93.50    9.40
   0 -12  -9   96.80    8.30
   0  12  10   17.90    1.90
   0 -12 -10   26.60    4.90
   0  12  11    2.10    1.20
   0 -12 -11   -0.50    5.50
   0  12  12   35.10    3.00
   0 -12 -12   44.60    5.00
   0  12  13   -1.60    2.10
   0 -12 -13   -0.30    3.70
   0  12  14    3.30    2.10
   0 -12 -14    9.10    5.00
   0  12  15    8.00    3.50
   0 -12 -15    8.40    3.90
   0  12  16   18.50    3.80
   0 -12 -16   33.50    6.90
   0  12  17   11.30    3.70
   0 -12 -17    3.60    4.20
   0  12  18    3.70    3.40
   0 -12 -18   -1.40    3.80
   0 -12 -19   33.40    7.10
   0 -12 -20    0.10    4.20
   0 -12 -21    6.80    5.60
   0 -12 -22    3.10    5.60
   0 -13  11    2.80    5.60
   0 -13   9    7.10    5.70
   0 -13   8    9.30    5.10
   0 -13   7   11.30    4.10
   0 -13   6   10.60    2.70
   0 -13   5    3.30    3.20
   0 -13   4    2.30    3.30
   0 -13   3   77.00    4.50
   0 -13   2    9.80    2.60
   0 -13   1   28.50    2.60
   0 -13   0   16.30    1.90
   0  13   1   20.60    3.50
   0 -13  -1   21.40    2.10
   0  13   2  159.80   12.50
   0 -13  -2  194.80    8.20
   0  13   3   10.40    3.40
   0 -13  -3   10.30    2.20
   0  13   4   57.50    4.90
   0 -13  -4   47.40    3.50
   0  13   5   10.10    2.00
   0 -13  -5   17.60    2.70
   0  13   6    5.00    1.90
   0 -13  -6    3.60    2.10
   0  13   7    1.40    1.70
   0 -13  -7    0.50    2.00
   0  13   8   -2.10    1.40
   0 -13  -8    4.00    4.10
   0  13   9   -1.10    1.90
   0 -13  -9    6.90    3.30
   0  13  10   -0.40    1.70
   0 -13 -10    0.90    2.70
   0  13  11   12.30    1.60
   0 -13 -11   18.40    5.50
   0  13  12   19.30    4.40
   0 -13 -12   23.80    5.90
   0  13  13    4.10    1.80
   0 -13 -13   10.40    4.30
   0  13  14   28.80    3.00
   0 -13 -14   33.90    5.20
   0  13  15    2.10    3.30
   0 -13 -15   11.60    5.20
   0  13  16   10.20    4.20
   0 -13 -16   18.30    6.70
   0  13  17    6.40    3.70
   0 -13 -17    3.50    4.60
   0  13  18    2.70    3.80
   0 -13 -18    1.20    6.00
   0 -13 -19   18.80    5.20
   0 -13 -20    5.40    5.10
   0 -13 -21    6.00    5.60
   0 -13 -22    3.90    5.40
   0 -14   9   -3.20    5.50
   0 -14   8    0.50    3.10
   0 -14   7   14.80    5.00
   0 -14   6    1.20    3.20
   0 -14   5   18.80    3.10
   0 -14   4    6.40    2.60
   0 -14   3    3.20    2.30
   0 -14   2   -2.70    2.90
   0 -14   1    3.80    1.80
   0 -14   0    1.30    1.60
   0 -14  -1    1.00    1.80
   0  14   2    2.50    3.50
   0 -14  -2    4.30    2.40
   0  14   3   83.00    7.40
   0 -14  -3   78.80    4.70
   0  14   4   72.20    7.20
   0 -14  -4  100.80    5.40
   0  14   5   24.10    2.80
   0 -14  -5   20.60    2.40
   0  14   6   79.10    4.80
   0 -14  -6   90.40    5.40
   0  14   7   23.10    3.00
   0 -14  -7   32.20    3.10
   0  14   8   19.00    2.40
   0 -14  -8   14.30    3.70
   0  14   9   15.20    2.10
   0 -14  -9   13.50    3.30
   0  14  10   -1.40    1.80
   0 -14 -10    0.70    3.10
   0  14  11   46.20    3.60
   0 -14 -11   56.70    6.60
   0  14  12    2.40    1.50
   0 -14 -12    5.30    4.20
   0  14  13    2.10    4.00
   0 -14 -13   10.90    5.20
   0 -14 -14    5.10    4.10
   0  14  15    4.50    4.30
   0 -14 -15   14.10    6.00
   0  14  16   -1.90    2.80
   0 -14 -16   -1.50    3.30
   0  14  17   62.20    5.80
   0 -14 -17   62.50    8.10
   0 -14 -18   -0.60    6.20
   0 -14 -19    1.20    5.40
   0 -14 -20   -0.30    4.60
   0 -14 -21    5.20    5.50
   0 -14 -22   -5.20    8.10
   0 -15   8   23.60    5.60
   0 -15   7    4.60    5.30
   0 -15   6    3.30    5.10
   0 -15   5    0.10    4.70
   0 -15   4   -1.20    3.00
   0 -15   3    9.10    5.10
   0 -15   2   -1.80    2.30
   0 -15   1    6.20    2.40
   0 -15   0   -0.90    1.80
   0 -15  -1   -1.30    2.10
   0  15   2    6.80    3.00
   0 -15  -2    1.10    1.80
   0  15   3  117.90    7.30
   0 -15  -3  117.60    5.10
   0  15   4  162.70    6.80
   0 -15  -4  156.10    6.60
   0  15   5  187.20    8.50
   0 -15  -5  190.90    7.90
   0  15   6  183.40    8.20
   0 -15  -6  190.80    7.60
   0  15   7   70.90    4.20
   0 -15  -7   77.20    5.00
   0  15   8   88.20    6.30
   0 -15  -8   98.60   10.90
   0  15   9   27.00    2.60
   0 -15  -9   20.00    3.90
   0  15  10  137.80   10.70
   0 -15 -10  137.00   10.10
   0  15  11    1.10    1.40
   0 -15 -11    7.20    7.20
   0  15  12   21.50    2.50
   0 -15 -12   28.30    4.60
   0 -15 -13   39.00    6.10
   0 -15 -14   13.70    6.30
   0 -15 -15   -1.90    4.00
   0 -15 -16    3.30    4.20
   0 -15 -17   14.50    7.00
   0 -15 -18    9.20    5.80
   0 -15 -19    0.20    5.20
   0 -15 -20   19.80    7.50
   0 -15 -21    7.50    7.90
   0 -16   6    3.90    4.80
   0 -16   5   -4.90    4.80
   0 -16   4    0.10    3.40
   0 -16   3    3.00    3.00
   0 -16   2    5.30    2.40
   0 -16   1   42.10    3.40
   0 -16   0    7.90    2.50
   0 -16  -1   10.20    2.10
   0 -16  -2    4.10    2.10
   0  16   3    6.90    4.30
   0 -16  -3    0.00    3.20
   0  16   4    0.90    2.50
   0 -16  -4    0.10    3.20
   0  16   5    4.30    2.60
   0 -16  -5   -1.80    2.30
   0  16   6   48.80    3.60
   0 -16  -6   51.90    3.80
   0  16   7   12.20    2.50
   0 -16  -7   18.60    3.50
   0  16   8   -1.10    3.00
   0 -16  -8   -2.60    2.70
   0  16   9  101.60    5.10
   0 -16  -9  101.40    9.30
   0  16  10   23.10    3.10
   0 -16 -10   31.00    6.30
   0  16  11   53.10    3.70
   0 -16 -11   77.10    7.50
   0  16  12   21.80    2.90
   0 -16 -12   14.50    4.50
   0  16  13    1.70    1.70
   0 -16 -13   12.50    5.80
   0 -16 -14    2.40    3.80
   0 -16 -15   18.30    4.90
   0 -16 -16   18.20    7.50
   0 -16 -17    5.20    4.40
   0 -16 -18    5.60    7.00
   0 -16 -19   -1.40    7.50
   0 -16 -20    2.30    5.10
   0 -17   5    3.40    3.10
   0 -17   4    5.40    3.20
   0 -17   3   37.40    4.50
   0 -17   2    5.90    3.80
   0 -17   1    2.70    3.20
   0 -17   0   -2.40    3.10
   0 -17  -1    1.50    2.20
   0 -17  -2    5.30    2.60
   0  17   3    6.80    4.00
   0 -17  -3    1.10    2.30
   0  17   4   -2.90    3.30
   0 -17  -4    1.90    2.70
   0  17   5    9.30    3.80
   0 -17  -5   10.30    3.60
   0  17   6    8.60    2.60
   0 -17  -6    8.40    3.00
   0  17   7    3.70    3.00
   0 -17  -7    5.70    3.10
   0  17   8   -3.50    3.30
   0 -17  -8   -4.80    3.30
   0  17   9    2.40    2.80
   0 -17  -9   -2.10    4.90
   0  17  10   65.90    5.10
   0 -17 -10   82.40    6.40
   0  17  11  109.60    7.60
   0 -17 -11  122.00   10.60
   0  17  12    5.70    2.20
   0 -17 -12    6.70    5.90
   0 -17 -13   -4.40    4.00
   0 -17 -14    7.60    6.50
   0 -17 -15    1.60    4.40
   0 -17 -16    8.20    5.00
   0 -17 -17    8.60    8.30
   0 -17 -18    7.50    5.90
   0 -17 -19    6.90    6.10
   0 -18   3   -1.10    3.80
   0 -18   2    9.20    4.70
   0 -18   1    6.40    3.20
   0 -18   0    7.50    3.70
   0 -18  -1    1.20    3.00
   0 -18  -2    5.00    3.60
   0 -18  -3    9.30    3.70
   0 -18  -4    7.40    4.00
   0  18   5    5.20    4.00
   0 -18  -5    5.60    2.70
   0  18   6   13.20    3.80
   0 -18  -6   17.10    3.20
   0  18   7   -1.90    5.30
   0 -18  -7   10.70    3.50
   0  18   8    2.00    5.30
   0 -18  -8    1.40    3.80
   0  18   9   16.40    3.80
   0 -18  -9   22.50    6.00
   0 -18 -10   29.70    5.70
   0  18  11    9.30    3.90
   0 -18 -11   12.60    5.20
   0  18  12   33.00    4.10
   0 -18 -12   23.70    7.30
   0 -18 -13   -1.50    4.90
   0 -18 -14   -4.00    4.60
   0 -18 -15  107.50    9.90
   0 -18 -16    0.80    4.10
   0 -18 -17    7.20    5.60
   0 -18 -18    0.40    8.10
   0 -19   1    7.70    3.70
   0 -19   0    6.60    4.00
   0 -19  -1    2.10    3.00
   0 -19  -2   21.80    4.10
   0 -19  -3    0.20    3.40
   0 -19  -4    1.60    2.70
   0 -19  -5    0.50    3.80
   0 -19  -6    7.20    3.00
   0 -19  -7    4.40    2.70
   0 -19  -8    3.00    5.00
   0 -19  -9    8.80    3.70
   0 -19 -10    8.80    6.00
   0 -19 -11   32.40    6.50
   0 -19 -12    2.30    4.80
   0 -19 -13    0.30    6.40
   0 -19 -14   13.50    6.00
   0 -19 -16   13.30    6.00
   0 -19 -17    0.40    5.50
   0 -20  -2   13.60    4.30
   0 -20  -3   15.30    4.10
   0 -20  -4   -3.60    2.90
   0 -20  -5    4.40    3.70
   0 -20  -6    7.20    3.20
   0 -20  -7   -1.70    3.00
   0 -20  -8    2.30    5.90
   0 -20  -9   39.90    7.30
   0 -20 -10   33.70    8.10
   0 -20 -11   -6.30    4.30
   0 -20 -12   20.70    7.50
   0 -20 -13   18.10    7.30
   0 -20 -14   37.20    7.70
   0 -20 -15    6.50    5.20
   0 -21  -8    7.80    4.30
   0 -21  -9   -9.20    6.60
   0 -21 -10   -4.00    4.40
   0 -21 -11    3.60    4.40
   1 -20 -14    3.50    5.00
   1 -20 -13   31.70    5.80
   1 -20 -12   -8.80    7.30
   1 -20 -11    3.90    6.40
   1 -20 -10   13.40    4.50
   1 -20  -9    2.30    5.40
   1 -20  -8   10.10    4.30
   1 -20  -7    0.50    5.30
   1 -20  -6    6.10    4.10
   1 -20  -5    9.40    3.20
   1 -20  -4    2.60    5.50
   1 -20  -3    1.90    4.30
   1 -19 -17    1.80    5.80
   1 -19 -16    3.40    5.70
   1 -19 -15   49.00    8.80
   1 -19 -14    9.70    5.40
   1 -19 -13   23.20    5.80
   1 -19 -12    1.00    5.80
   1 -19 -11   24.30    5.90
   1 -19 -10   29.30    5.80
  -1  19  10   27.80    4.20
   1 -19  -9    3.60    5.50
   1 -19  -8   47.10    5.70
   1 -19  -7   57.20    8.20
   1 -19  -6   -3.00    3.50
   1 -19  -5    8.50    3.20
   1 -19  -4   -4.40    3.20
   1 -19  -3    0.30    2.60
   1 -19  -2    9.80    3.50
   1 -19  -1    1.90    5.10
   1 -19   0   -2.00    5.00
   1 -18 -18   -2.30    7.50
   1 -18 -17    5.60    4.40
   1 -18 -16   23.90    6.10
   1 -18 -15    4.00    4.70
   1 -18 -14    3.50    6.50
   1 -18 -13    6.30    4.40
   1 -18 -12    2.50    5.40
  -1  18  12    2.30    3.20
   1 -18 -11    2.70    3.70
  -1  18  11    1.20    2.70
   1 -18 -10  112.20    8.20
  -1  18  10   97.40    6.90
   1 -18  -9   16.90    4.10
  -1  18   9   10.70    3.50
   1 -18  -8   16.00    5.70
  -1  18   8    8.40    5.30
   1 -18  -7   17.80    3.20
  -1  18   7   18.10    4.30
   1 -18  -6    6.30    3.70
  -1  18   6   12.60    3.90
   1 -18  -5   19.20    4.00
   1 -18  -4    0.80    2.40
   1 -18  -3   19.10    3.90
   1 -18  -2    4.60    3.20
   1 -18  -1   13.40    3.40
   1 -18   0    5.30    3.80
   1 -18   1    4.30    2.70
   1 -18   2   16.80    6.50
   1 -17 -19   14.50    5.70
   1 -17 -18    9.60    6.30
   1 -17 -17   -0.70    7.00
   1 -17 -16    8.10    6.90
   1 -17 -15   -5.30    5.00
   1 -17 -14   94.10    8.00
   1 -17 -13   12.50    5.60
  -1  17  13   19.00    3.30
   1 -17 -12   44.60    5.30
  -1  17  12   22.00    3.60
   1 -17 -11    6.70    5.20
  -1  17  11    2.60    1.90
   1 -17 -10    5.00    3.60
  -1  17  10    4.80    2.50
   1 -17  -9   73.80    6.80
  -1  17   9   64.30    4.20
   1 -17  -8    6.70    4.60
  -1  17   8    4.30    3.70
   1 -17  -7    3.50    2.50
  -1  17   7    6.60    3.40
   1 -17  -6    9.70    2.90
  -1  17   6   17.10    3.60
   1 -17  -5   12.30    2.70
  -1  17   5   11.10    2.80
   1 -17  -4    1.00    2.90
  -1  17   4    3.60    4.40
   1 -17  -3    0.50    2.20
   1 -17  -2    2.50    2.10
   1 -17  -1    1.20    2.70
   1 -17   0    4.90    2.90
   1 -17   1    7.80    3.10
   1 -17   2   21.10    3.90
   1 -17   3    1.00    3.10
   1 -17   4    8.80    7.40
   1 -16 -20   -2.80    5.10
   1 -16 -19    9.20    7.20
   1 -16 -18    1.60    5.00
   1 -16 -17    9.80    4.60
   1 -16 -16    8.20    4.70
   1 -16 -15   61.30    8.00
   1 -16 -14    1.30    3.40
   1 -16 -13   15.90    4.20
  -1  16  13   11.40    3.00
   1 -16 -12    5.70    3.00
  -1  16  12    9.00    2.30
   1 -16 -11  141.50    9.20
  -1  16  11  119.20    6.10
   1 -16 -10   76.50    6.70
  -1  16  10   85.40    4.80
   1 -16  -9    2.30    4.00
  -1  16   9    1.40    2.30
   1 -16  -8   14.20    4.30
  -1  16   8    4.10    2.40
   1 -16  -7   13.30    3.10
  -1  16   7   11.10    3.50
   1 -16  -6   46.60    3.70
  -1  16   6   50.50    4.10
   1 -16  -5   30.40    3.20
  -1  16   5   24.20    3.00
   1 -16  -4   92.60    5.70
  -1  16   4   78.30    5.10
   1 -16  -3   11.70    2.60
  -1  16   3    9.70    3.50
   1 -16  -2   28.80    2.90
   1 -16  -1   -0.20    1.90
   1 -16   0    0.30    1.80
   1 -16   1   11.30    2.70
   1 -16   2   29.10    3.90
   1 -16   3   15.40    3.40
   1 -16   4    0.50    2.30
   1 -16   5    2.00    3.20
   1 -16   6   16.50    3.60
   1 -15 -21    4.50    7.10
   1 -15 -20    4.80    4.80
   1 -15 -19    4.90    5.10
   1 -15 -18   13.90    5.80
   1 -15 -17   -2.20    4.00
  -1  15  17    5.70    4.80
   1 -15 -16   14.00    6.30
  -1  15  16   -5.40    3.50
   1 -15 -15    1.50    4.30
  -1  15  15   -1.90    3.30
   1 -15 -14   -5.10    4.80
  -1  15  14   -1.40    3.70
   1 -15 -13   -0.90    3.20
  -1  15  13   -0.50    1.30
   1 -15 -12   21.50    5.40
  -1  15  12   18.90    2.70
   1 -15 -11    4.20    3.50
  -1  15  11    9.70    2.60
   1 -15 -10   15.60    4.80
  -1  15  10   21.50    2.90
   1 -15  -9   23.10    4.50
  -1  15   9   26.70    2.40
   1 -15  -8  158.60   10.70
  -1  15   8  159.50    7.70
   1 -15  -7    7.60    3.40
  -1  15   7    6.60    2.80
   1 -15  -6  192.70    8.20
  -1  15   6  165.20    8.10
   1 -15  -5    6.80    2.70
  -1  15   5    8.70    2.50
   1 -15  -4    5.10    2.50
  -1  15   4    2.90    1.90
   1 -15  -3    1.40    2.60
  -1  15   3    0.40    1.90
   1 -15  -2   76.50    3.70
  -1  15   2   65.00    6.30
   1 -15  -1   14.60    2.20
   1 -15   0   14.10    2.30
   1 -15   1    0.50    2.10
   1 -15   2   14.80    2.30
   1 -15   3   -3.80    2.30
   1 -15   4    0.50    2.30
   1 -15   5    8.80    2.70
   1 -15   6   10.30    3.50
   1 -15   7   20.20    5.30
   1 -15   8    2.70    3.90
   1 -14 -21    9.60    6.10
   1 -14 -20   -3.00    5.50
   1 -14 -19   -0.30    4.70
   1 -14 -18   -1.10    6.00
  -1  14  18   -1.60    3.50
   1 -14 -17    2.80    4.10
  -1  14  17   13.60    3.80
   1 -14 -16    8.50    4.00
  -1  14  16   -3.30    3.00
   1 -14 -15    4.30    4.20
  -1  14  15   -2.50    2.20
   1 -14 -14   14.00    4.80
  -1  14  14    7.10    3.20
   1 -14 -13   16.40    4.00
  -1  14  13   12.30    2.40
   1 -14 -12   41.10    5.20
  -1  14  12   46.40    3.20
   1 -14 -11   33.30    5.90
  -1  14  11   25.10    2.50
   1 -14 -10    7.00    3.10
  -1  14  10    7.60    2.20
   1 -14  -9   -0.70    2.50
  -1  14   9   -0.60    1.40
   1 -14  -8    0.70    2.80
  -1  14   8   -0.40    1.80
   1 -14  -7   15.20    3.00
  -1  14   7   13.20    2.10
   1 -14  -6   73.10    4.20
  -1  14   6   72.50    4.10
   1 -14  -5  636.90   20.00
  -1  14   5  607.70   24.70
   1 -14  -4  462.60   16.20
  -1  14   4  460.00   15.80
   1 -14  -3   73.90    4.30
  -1  14   3   71.10    4.20
   1 -14  -2   66.70    4.00
  -1  14   2   66.80    5.30
   1 -14  -1   71.30    3.60
   1 -14   0    0.90    1.80
   1 -14   1    5.40    1.90
   1 -14   2    5.80    1.80
   1 -14   3   29.50    2.80
   1 -14   4    0.40    1.90
   1 -14   5   -3.10    2.20
   1 -14   6    6.90    3.60
   1 -14   7    1.20    3.30
   1 -14   8    3.90    2.90
   1 -14   9   -0.70    3.70
   1 -13 -22   30.80    7.70
   1 -13 -21   -5.20    5.60
   1 -13 -20   -0.60    4.40
   1 -13 -19   -0.20    6.50
   1 -13 -18   34.40    5.90
  -1  13  18   34.20    5.70
   1 -13 -17   -1.60    3.90
  -1  13  17   -0.20    4.40
   1 -13 -16   -4.50    3.30
  -1  13  16   -3.30    2.90
   1 -13 -15    0.80    5.00
  -1  13  15    3.50    3.80
   1 -13 -14    0.40    3.00
  -1  13  14    5.40    3.30
   1 -13 -13    2.10    4.80
  -1  13  13    0.90    3.10
   1 -13 -12    7.80    3.40
  -1  13  12    5.00    1.20
   1 -13 -11   46.40    5.90
  -1  13  11   47.50    2.90
   1 -13 -10   18.30    5.00
  -1  13  10   15.40    2.40
   1 -13  -9  138.60    9.40
  -1  13   9  116.10    6.10
   1 -13  -8   19.50    4.20
  -1  13   8   10.40    2.20
   1 -13  -7    5.20    3.30
  -1  13   7    3.00    2.30
   1 -13  -6   82.50    4.40
  -1  13   6   83.30    4.30
   1 -13  -5    3.90    2.10
  -1  13   5   -2.50    1.70
   1 -13  -4   -1.00    1.90
  -1  13   4    0.40    2.50
   1 -13  -3   20.10    3.30
  -1  13   3   22.20    2.80
   1 -13  -2    3.80    1.80
  -1  13   2    0.50    2.10
   1 -13  -1   20.30    2.50
   1 -13   0    7.40    1.80
   1 -13   1   71.20    3.70
   1 -13   2   89.90    4.40
   1 -13   3   19.20    2.30
   1 -13   4    5.90    2.30
   1 -13   5   51.80    3.60
   1 -13   6   -2.00    2.10
   1 -13   7   -1.50    2.10
   1 -13   8    2.10    2.90
   1 -13   9    6.00    3.60
   1 -13  10    7.50    4.50
   1 -13  11   -0.60    3.60
   1 -12 -22    6.60    9.10
   1 -12 -21   22.20    8.60
   1 -12 -20   -5.50    7.00
   1 -12 -19   39.90    6.90
  -1  12  19   35.10    5.20
   1 -12 -18    0.70    2.00
  -1  12  18    5.80    4.20
   1 -12 -17    7.60    1.90
  -1  12  17    4.70    4.20
   1 -12 -16   12.30    1.90
  -1  12  16   13.80    4.40
   1 -12 -15    0.10    4.60
  -1  12  15    2.80    4.00
   1 -12 -14    2.00    3.90
  -1  12  14   -3.40    2.40
   1 -12 -13   13.30    4.70
  -1  12  13    7.30    2.20
   1 -12 -12    3.80    3.00
  -1  12  12    2.10    2.70
   1 -12 -11   14.10    3.30
  -1  12  11   12.80    1.50
   1 -12 -10   28.20    4.80
  -1  12  10   22.00    1.90
   1 -12  -9    4.50    4.30
  -1  12   9    1.20    1.30
   1 -12  -8   85.60    6.70
  -1  12   8   85.60    3.50
   1 -12  -7   57.30    7.00
  -1  12   7   71.90    4.70
   1 -12  -6   11.70    2.70
  -1  12   6   12.60    2.20
   1 -12  -5   11.90    2.20
  -1  12   5   19.30    2.30
   1 -12  -4   26.70    2.90
  -1  12   4   23.60    2.20
   1 -12  -3   18.40    2.60
  -1  12   3   19.20    2.60
   1 -12  -2  106.30    5.30
  -1  12   2   94.80    6.40
   1 -12  -1  424.90   11.20
  -1  12   1  405.90   26.30
   1 -12   0  111.20    4.40
   1 -12   1    5.30    1.70
   1 -12   2  228.50    6.90
   1 -12   3   23.90    2.90
   1 -12   4    1.90    2.30
   1 -12   5   -0.60    2.40
   1 -12   6   36.90    3.60
   1 -12   7    0.40    2.60
   1 -12   8    1.70    2.80
   1 -12   9   10.20    3.60
   1 -12  10   -1.80    4.20
   1 -12  11   -1.50    3.20
   1 -12  12   11.90    5.70
   1 -11 -22   15.50    8.90
   1 -11 -21   -0.50    7.20
   1 -11 -20   -2.00    7.00
   1 -11 -19   17.10    2.50
   1 -11 -18    2.40    1.50
   1 -11 -17   25.40    2.70
   1 -11 -16    2.50    1.80
  -1  11  16    1.80    3.60
   1 -11 -15   -0.50    1.70
  -1  11  15    2.60    3.20
   1 -11 -14   11.80    1.50
  -1  11  14    8.80    2.50
   1 -11 -13    2.50    1.40
  -1  11  13    3.00    1.80
   1 -11 -12    3.20    3.30
  -1  11  12    2.90    2.20
   1 -11 -11   -3.60    2.70
  -1  11  11    0.30    2.00
   1 -11 -10    2.80    3.60
  -1  11  10    1.40    1.40
   1 -11  -9   14.10    4.10
  -1  11   9    7.10    1.60
   1 -11  -8   -0.60    3.40
  -1  11   8    2.40    1.60
   1 -11  -7    0.20    2.20
  -1  11   7    1.70    1.60
   1 -11  -6   14.80    2.10
  -1  11   6   10.20    1.90
   1 -11  -5    6.10    2.00
  -1  11   5    7.70    1.50
   1 -11  -4    5.60    2.40
  -1  11   4    0.00    1.90
   1 -11  -3   11.60    2.20
  -1  11   3    9.60    2.40
   1 -11  -2   13.40    2.50
  -1  11   2    8.30    2.80
   1 -11  -1    5.60    1.80
  -1  11   1    7.90    2.50
   1 -11   0   -0.90    1.40
   1 -11   1    8.90    1.60
   1 -11   2  124.10    5.30
   1 -11   3    1.90    2.20
   1 -11   4  128.80    5.70
   1 -11   5  188.50    7.70
   1 -11   6   89.40    4.80
   1 -11   7   40.30    3.40
   1 -11   8   20.10    3.30
   1 -11   9   24.90    3.40
   1 -11  10   18.90    5.40
   1 -11  11    3.40    4.10
   1 -11  12    0.20    5.30
   1 -11  13   -2.40    4.80
   1 -10 -22    5.60    9.00
   1 -10 -21    0.30    6.80
   1 -10 -20    5.80    7.10
   1 -10 -19    4.10    1.80
   1 -10 -18    3.60    1.50
   1 -10 -17   -0.10    1.60
   1 -10 -16    4.40    2.10
   1 -10 -15   73.50    4.00
  -1  10  15   69.10    7.90
   1 -10 -14   13.10    1.70
  -1  10  14    8.30    4.00
   1 -10 -13   10.00    1.70
  -1  10  13   12.60    2.20
   1 -10 -12    6.10    1.50
  -1  10  12    5.80    2.00
   1 -10 -11  102.90    4.80
  -1  10  11   92.90    5.20
   1 -10 -10   -2.10    3.50
  -1  10  10    1.00    1.10
   1 -10  -9    9.00    3.80
  -1  10   9   10.20    1.40
   1 -10  -8   13.00    4.00
  -1  10   8    7.90    1.30
   1 -10  -7   22.70    2.70
  -1  10   7   23.40    1.90
   1 -10  -6    0.40    3.00
  -1  10   6    3.80    1.90
   1 -10  -5   53.30    3.40
  -1  10   5   52.60    2.70
   1 -10  -4   26.60    2.30
  -1  10   4   30.20    2.20
   1 -10  -3    5.80    2.20
  -1  10   3    4.40    2.00
   1 -10  -2   18.90    2.40
  -1  10   2   24.10    4.10
   1 -10  -1   14.20    2.20
  -1  10   1   10.10    2.80
   1 -10   0    5.10    1.40
   1 -10   1   94.40    4.20
   1 -10   2   11.50    1.60
   1 -10   3  250.90    9.70
   1 -10   4  824.00   27.50
   1 -10   5  115.80    5.60
   1 -10   6   10.00    2.40
   1 -10   7   19.00    2.90
   1 -10   8    6.90    3.00
   1 -10   9   48.70    4.00
   1 -10  10  123.60    7.90
   1 -10  11   30.20    6.40
   1 -10  12   13.10    5.30
   1 -10  13   -2.10    3.80
   1 -10  14    5.90    4.10
   1  -9 -23   -6.30    9.60
   1  -9 -22   35.70    9.80
   1  -9 -21   13.10    7.40
   1  -9 -20    3.20    6.50
   1  -9 -19    4.50    5.90
   1  -9 -18   -0.50    3.50
   1  -9 -17   33.30    6.50
   1  -9 -16   13.60    5.20
   1  -9 -15   12.10    1.90
  -1   9  15    9.60    4.30
   1  -9 -14   15.50    2.40
  -1   9  14   15.90    3.70
   1  -9 -13   22.00    2.10
  -1   9  13   28.70    5.80
   1  -9 -12   37.90    2.10
  -1   9  12   33.30    4.10
   1  -9 -11   33.80    2.40
  -1   9  11   34.40    3.10
   1  -9 -10    1.20    1.50
  -1   9  10    0.50    1.90
   1  -9  -9   17.30    1.70
  -1   9   9   19.10    1.60
   1  -9  -8   53.40    4.40
  -1   9   8   43.40    2.10
   1  -9  -7    7.60    3.30
  -1   9   7    6.70    1.10
   1  -9  -6   84.70    4.60
  -1   9   6   82.40    3.10
   1  -9  -5    2.00    2.20
  -1   9   5    3.10    1.50
   1  -9  -4    7.00    1.80
  -1   9   4    5.70    1.60
   1  -9  -3   46.30    2.80
  -1   9   3   48.10    2.40
   1  -9  -2   -0.80    2.10
  -1   9   2    4.60    1.80
   1  -9  -1    7.90    1.70
  -1   9   1    6.00    1.80
   1  -9   0   32.30    1.80
   1  -9   1   16.30    1.90
   1  -9   2    4.20    1.90
   1  -9   3    6.60    1.60
   1  -9   4   -1.30    1.20
   1  -9   5  233.50    9.30
   1  -9   6    8.60    2.10
   1  -9   7  139.40    6.40
   1  -9   8  267.30   11.50
   1  -9   9   69.00    5.00
   1  -9  10   45.70    4.00
   1  -9  11    6.80    4.80
   1  -9  12   -1.80    3.00
  -1   9 -12    5.00    4.20
   1  -9  13    8.00    4.00
  -1   9 -13    1.40    4.10
   1  -9  14    2.40    4.40
  -1   9 -14    8.40    4.40
   1  -9  15    5.10    5.20
  -1   9 -15    3.70    4.80
   1  -8 -23   19.50   11.00
   1  -8 -22    2.40    8.40
   1  -8 -21    9.10    8.50
   1  -8 -20    1.80    7.20
   1  -8 -19   10.00    5.80
   1  -8 -18    3.30    1.10
   1  -8 -17    4.00    1.10
   1  -8 -16    6.00    0.90
   1  -8 -15   39.20    2.10
  -1   8  15   34.70    5.80
   1  -8 -14   52.50    5.60
  -1   8  14   67.00    5.90
   1  -8 -13  115.70    8.90
  -1   8  13  109.70    8.80
   1  -8 -12    9.40    1.90
  -1   8  12   -1.40    3.10
   1  -8 -11    1.90    1.20
  -1   8  11    2.90    3.30
   1  -8 -10  173.50    6.20
  -1   8  10  199.10   10.40
   1  -8  -9  114.50    4.50
  -1   8   9  107.30    4.40
   1  -8  -8   59.40    2.90
  -1   8   8   63.50    2.70
   1  -8  -7  379.00   12.10
  -1   8   7  368.90    9.80
   1  -8  -6    0.70    2.80
  -1   8   6    8.00    1.00
   1  -8  -5   75.60    4.30
  -1   8   5   77.10    2.80
   1  -8  -4   93.70    4.50
  -1   8   4   98.90    3.60
   1  -8  -3    6.50    2.10
  -1   8   3    6.80    1.40
   1  -8  -2   66.80    3.10
  -1   8   2   68.30    5.00
   1  -8  -1    5.60    1.50
  -1   8   1    6.80    1.80
   1  -8   0    5.40    1.80
  -1   8   0    7.60    2.20
   1  -8   1  238.40    8.10
   1  -8   2    1.30    1.70
   1  -8   3   16.70    1.90
   1  -8   4    4.70    1.90
   1  -8   5   -0.10    1.60
   1  -8   6   21.10    2.60
   1  -8   7    9.70    2.30
   1  -8   8    2.50    2.10
  -1   8  -8    5.20    2.50
   1  -8   9   -3.90    3.50
  -1   8  -9   -0.80    2.10
   1  -8  10  446.30   25.00
  -1   8 -10  454.20   23.70
   1  -8  11   16.10    3.90
  -1   8 -11   11.00    4.00
  -1   8 -12   31.40    5.50
  -1   8 -13    2.30    3.90
  -1   8 -14    5.00    4.50
  -1   8 -15    0.80    3.60
  -1   8 -16    3.90    4.70
   1  -7 -23    9.50   10.90
   1  -7 -22    2.00    8.10
   1  -7 -21    7.40    6.60
   1  -7 -20   10.30    4.60
   1  -7 -19   35.70    6.50
   1  -7 -18    6.80    1.50
   1  -7 -17   11.20    1.70
   1  -7 -16    7.90    1.40
   1  -7 -15    6.20    1.70
  -1   7  15    7.00    5.50
   1  -7 -14   70.20    3.10
  -1   7  14   80.90    6.90
   1  -7 -13   26.30    1.70
  -1   7  13   31.90    4.10
   1  -7 -12   -0.70    1.00
  -1   7  12    2.00    3.60
   1  -7 -11   14.40    3.20
  -1   7  11   11.10    2.70
   1  -7 -10    1.80    3.60
  -1   7  10    1.90    2.40
   1  -7  -9   59.80    2.70
  -1   7   9   54.00    3.60
   1  -7  -8 1131.10   33.20
  -1   7   8 1126.30   29.40
   1  -7  -7    1.80    1.20
  -1   7   7    2.60    1.10
   1  -7  -6   66.50    2.70
  -1   7   6   63.00    2.20
   1  -7  -5  103.80    5.80
  -1   7   5   94.50    3.10
   1  -7  -4   26.50    2.20
  -1   7   4   25.40    1.50
   1  -7  -3   79.70    3.70
  -1   7   3   85.90    4.10
   1  -7  -2  124.70    5.10
  -1   7   2  112.90    5.80
   1  -7  -1  257.20    8.20
  -1   7   1  272.70   12.30
   1  -7   0  517.60   18.20
  -1   7   0  529.10   24.60
   1  -7   1   46.50    2.30
   1  -7   2    0.10    1.20
   1  -7   3  122.90    4.60
   1  -7   4   94.60    3.70
   1  -7   5  153.60    6.20
   1  -7   6    7.60    2.40
  -1   7  -6   17.30    3.60
   1  -7   7   19.50    2.90
  -1   7  -7   28.50    2.90
   1  -7   8  107.60    6.70
  -1   7  -8  111.10    7.10
   1  -7   9   49.90    6.60
  -1   7  -9   36.20    4.10
   1  -7  10  191.10   14.80
  -1   7 -10  206.80   11.70
   1  -7  11   27.40    4.60
  -1   7 -11   32.20    5.20
   1  -7  12   39.30    6.30
  -1   7 -12   31.10    5.10
  -1   7 -13   -3.80    3.60
  -1   7 -14    7.40    4.80
  -1   7 -15    6.40    4.90
  -1   7 -16   25.70    6.50
  -1   7 -17   15.10    8.00
   1  -6 -23  -14.70    8.80
   1  -6 -22    4.90    6.00
   1  -6 -21    3.40    5.50
   1  -6 -20   26.50    7.10
   1  -6 -19   -3.70    4.20
   1  -6 -18   12.40    4.80
   1  -6 -17    8.60    3.90
   1  -6 -16   43.50    5.20
   1  -6 -15   11.60    1.60
  -1   6  15    3.20    5.60
   1  -6 -14  111.80    4.60
  -1   6  14  104.30    8.20
   1  -6 -13    0.00    1.20
  -1   6  13    0.60    2.90
   1  -6 -12   11.10    1.50
  -1   6  12   15.60    3.30
   1  -6 -11   74.30    3.00
  -1   6  11   74.40    7.10
   1  -6 -10   31.60    1.70
  -1   6  10   27.30    3.30
   1  -6  -9    2.70    1.10
  -1   6   9   -3.40    2.40
   1  -6  -8    3.10    1.20
  -1   6   8   10.20    3.60
   1  -6  -7   92.00    3.70
  -1   6   7   99.50    4.00
   1  -6  -6  159.70    5.40
  -1   6   6  154.20    4.20
   1  -6  -5  374.20   12.30
  -1   6   5  376.20    9.40
   1  -6  -4  109.50    5.60
  -1   6   4  117.00    3.30
   1  -6  -3    9.60    1.40
  -1   6   3    9.70    1.10
   1  -6  -2   -1.00    1.40
  -1   6   2   -0.40    1.50
   1  -6  -1   37.30    2.50
  -1   6   1   32.90    2.10
   1  -6   0    0.90    1.60
  -1   6   0    1.10    1.90
   1  -6   1  435.00   12.70
   1  -6   2   16.70    1.90
   1  -6   3    3.80    1.30
   1  -6   4  165.80    5.70
  -1   6  -4  159.50    7.10
   1  -6   5   29.50    3.40
  -1   6  -5   28.40    3.10
   1  -6   6   -1.70    2.00
  -1   6  -6   -3.60    2.80
   1  -6   7    7.50    2.50
  -1   6  -7   -0.60    3.30
   1  -6   8   16.80    4.00
  -1   6  -8   13.60    3.40
   1  -6   9   27.90    3.80
  -1   6  -9   18.90    3.00
   1  -6  10    3.60    4.10
  -1   6 -10    8.90    3.30
   1  -6  11    1.90    3.50
  -1   6 -11    0.30    4.50
   1  -6  12   47.00    6.40
  -1   6 -12   72.10    7.20
  -1   6 -13    0.80    5.80
  -1   6 -14   27.00    4.90
  -1   6 -15   15.40    4.90
  -1   6 -16   -4.20    3.40
  -1   6 -17   39.80    7.90
   1  -5 -22    7.70    6.00
   1  -5 -21   -6.00    5.90
   1  -5 -20   -7.30    4.60
   1  -5 -19    9.70    6.40
   1  -5 -18   11.70    6.50
   1  -5 -17   -1.00    4.90
   1  -5 -16    9.20    5.50
   1  -5 -15   17.20    5.90
  -1   5  15   11.40    4.10
   1  -5 -14   65.70    6.60
  -1   5  14   62.70    6.80
   1  -5 -13  242.50   14.20
  -1   5  13  244.80   14.10
   1  -5 -12   -0.10    3.20
  -1   5  12    1.00    2.40
   1  -5 -11   24.90    4.00
  -1   5  11   23.20    3.80
   1  -5 -10  331.70   11.10
  -1   5  10  352.80   18.90
   1  -5  -9  200.70    7.00
  -1   5   9  213.90    8.90
   1  -5  -8  864.00   25.10
  -1   5   8  853.50   32.60
   1  -5  -7   21.70    1.60
  -1   5   7   23.20    3.50
   1  -5  -6   33.20    2.00
  -1   5   6   28.50    1.80
   1  -5  -5   99.00    3.70
  -1   5   5  104.00    3.60
   1  -5  -4  172.90    5.60
  -1   5   4  171.80    3.90
   1  -5  -3   37.50    2.30
  -1   5   3   33.40    1.80
   1  -5  -2   34.00    1.80
  -1   5   2   34.90    1.70
   1  -5  -1   15.80    1.60
  -1   5   1   13.00    1.60
   1  -5   0  854.50   25.90
  -1   5   0  857.20   35.60
   1  -5   1   79.70    3.20
   1  -5   2  141.80    5.10
   1  -5   3   22.30    2.00
  -1   5  -3   24.70    2.80
   1  -5   4   -1.10    2.00
  -1   5  -4    1.00    1.70
   1  -5   5  242.80   10.40
  -1   5  -5  248.20   11.10
   1  -5   6  108.50    6.80
  -1   5  -6  101.20    5.80
   1  -5   7    2.40    2.20
  -1   5  -7    0.40    2.90
   1  -5   8   19.50    3.90
  -1   5  -8   12.50    3.00
   1  -5   9   32.70    3.50
  -1   5  -9   43.20    4.80
   1  -5  10   72.50    7.80
  -1   5 -10   73.10    5.10
   1  -5  11   16.70    4.60
  -1   5 -11   21.40    3.80
   1  -5  12   -0.70    3.40
  -1   5 -12    1.10    3.40
   1  -5  13    1.70    4.10
  -1   5 -13    1.00    3.80
  -1   5 -14    8.80    5.50
  -1   5 -15   -1.60    3.30
  -1   5 -16    6.80    4.70
  -1   5 -17    7.40    6.30
  -1   5 -18   16.00    5.80
   1  -4 -22   15.40    6.10
   1  -4 -21   11.60    8.60
   1  -4 -20   13.90    8.50
   1  -4 -19   -0.90    3.90
   1  -4 -18   -1.60    3.90
   1  -4 -17   -0.20    3.90
   1  -4 -16    0.50    4.00
   1  -4 -15   -4.00    3.00
  -1   4  15   -1.60    3.10
   1  -4 -14   -4.80    3.30
  -1   4  14    5.40    5.00
   1  -4 -13    6.50    4.70
  -1   4  13    2.30    2.80
   1  -4 -12   60.70    5.80
  -1   4  12   60.70    5.70
   1  -4 -11  102.70    7.00
  -1   4  11  118.10    7.70
   1  -4 -10  960.40   37.80
  -1   4  10  966.70   36.60
   1  -4  -9    7.20    2.70
  -1   4   9    9.10    2.90
   1  -4  -8    6.30    1.40
  -1   4   8    3.90    3.20
   1  -4  -7   36.90    2.10
  -1   4   7   36.20    4.10
   1  -4  -6   18.40    1.40
  -1   4   6   17.20    2.80
   1  -4  -5   29.50    1.60
  -1   4   5   30.80    1.70
   1  -4  -4 3333.90  107.70
  -1   4   4 3324.30  145.10
   1  -4  -3  274.50    8.60
  -1   4   3  268.90    6.10
   1  -4  -2   41.80    4.30
  -1   4   2   44.30    2.10
   1  -4  -1   77.40    6.00
  -1   4   1   73.60    2.20
   1  -4   0   31.90    1.70
  -1   4   0   37.30    2.30
   1  -4   1  770.10   26.70
   1  -4   2    1.70    0.90
  -1   4  -2    3.00    1.40
   1  -4   3    5.90    1.80
  -1   4  -3    8.50    2.20
   1  -4   4   46.30    3.50
  -1   4  -4   48.80    3.40
   1  -4   5    7.80    1.80
  -1   4  -5    9.00    1.90
   1  -4   6   -1.70    1.80
  -1   4  -6   -3.50    1.90
   1  -4   7    3.90    3.00
  -1   4  -7    0.70    2.20
   1  -4   8    0.80    2.10
  -1   4  -8   -1.40    2.00
   1  -4   9    5.50    2.30
  -1   4  -9    6.00    3.20
   1  -4  10    6.80    3.60
  -1   4 -10   10.20    3.80
   1  -4  11    7.50    4.20
  -1   4 -11   16.10    4.70
   1  -4  12    5.20    4.40
  -1   4 -12   10.90    3.10
   1  -4  13   -1.30    4.30
  -1   4 -13    1.90    3.40
  -1   4 -14    4.80    4.20
  -1   4 -15   30.20    4.70
  -1   4 -16   22.40    5.60
  -1   4 -17   82.00    9.80
  -1   4 -18    2.30    4.40
  -1   4 -19    8.60    7.70
   1  -3 -22   -1.50    8.50
   1  -3 -21   10.30    7.20
   1  -3 -20   14.90    5.50
   1  -3 -19    4.70    4.10
   1  -3 -18   -0.70    5.70
   1  -3 -17    6.00    5.60
   1  -3 -16   25.00    5.00
   1  -3 -15    0.40    3.30
  -1   3  15    0.70    3.20
   1  -3 -14    8.60    3.70
  -1   3  14   19.90    5.80
   1  -3 -13    3.20    3.10
  -1   3  13    4.60    2.90
   1  -3 -12   84.30    6.30
  -1   3  12   78.10    6.00
   1  -3 -11   26.10    4.90
  -1   3  11   36.70    4.90
   1  -3 -10  101.00    8.30
  -1   3  10   90.50    6.40
   1  -3  -9  441.30   21.70
  -1   3   9  443.10   16.40
   1  -3  -8 1008.60   36.50
  -1   3   8 1023.90   34.90
   1  -3  -7  132.20    6.20
  -1   3   7  141.90    7.70
   1  -3  -6  223.60   15.20
  -1   3   6  228.50    9.20
   1  -3  -5 1552.40   67.30
  -1   3   5 1591.10   63.30
   1  -3  -4  729.50   30.50
  -1   3   4  753.60   34.60
  -1   3   2   13.40    3.40
  -1   3   1    8.10    1.80
   1  -3   2  262.00   12.00
  -1   3  -2  254.60   11.30
   1  -3   3  596.80   34.00
  -1   3  -3  582.00   27.50
   1  -3   4   17.90    2.00
  -1   3  -4   19.00    4.60
   1  -3   5   22.50    2.70
  -1   3  -5   23.40    3.20
   1  -3   6   25.10    2.10
  -1   3  -6   24.10    2.80
   1  -3   7   11.30    2.60
  -1   3  -7    5.10    2.90
   1  -3   8   74.70    5.90
  -1   3  -8   74.00    5.70
   1  -3   9    8.90    3.40
  -1   3  -9    9.60    3.30
   1  -3  10   -1.10    3.20
  -1   3 -10    0.00    2.70
   1  -3  11   -1.30    3.30
  -1   3 -11    2.10    3.00
   1  -3  12    6.20    4.60
  -1   3 -12    6.30    3.50
   1  -3  13   -3.70    5.00
  -1   3 -13    8.70    4.90
   1  -3  14    3.20    3.90
  -1   3 -14    9.50    3.80
  -1   3 -15    3.40    5.90
  -1   3 -16    8.00    4.20
  -1   3 -17    6.00    6.00
  -1   3 -18    7.30    5.40
  -1   3 -19    1.50    5.00
   1  -2 -22    6.20    6.80
   1  -2 -21    1.70    6.40
   1  -2 -20   -2.90    7.10
   1  -2 -19    0.00    4.50
   1  -2 -18    4.20    4.10
   1  -2 -17    4.20    4.70
   1  -2 -16   -9.20    5.40
   1  -2 -15   33.70    6.20
  -1   2  15   28.70    6.00
   1  -2 -14    2.00    3.70
  -1   2  14   -0.80    3.20
   1  -2 -13   16.90    3.90
  -1   2  13   22.30    3.60
   1  -2 -12   36.40    5.90
  -1   2  12   27.70    4.30
   1  -2 -11   66.00    5.00
  -1   2  11   62.70    5.40
   1  -2 -10   46.60    4.60
  -1   2  10   34.90    3.90
   1  -2  -9  221.00    9.60
  -1   2   9  228.50   18.60
   1  -2  -8   21.10    3.40
  -1   2   8   14.90    3.30
   1  -2  -7  226.10   10.60
  -1   2   7  236.80   11.00
   1  -2  -6  410.40   19.00
  -1   2   6  400.50   17.00
   1  -2  -5  656.20   29.00
  -1   2   5  656.80   25.60
  -1   2   2    4.70    1.10
   1  -2  -1    0.20    0.40
  -1   2   1   -1.10    0.70
   1  -2   0    1.00    0.30
  -1   2   0    0.60    0.40
   1  -2   2   27.00    4.70
   1  -2   3    4.30    1.30
  -1   2  -3    3.00    2.50
   1  -2   4   68.40    3.90
  -1   2  -4   65.00    4.50
   1  -2   5   -0.30    2.00
  -1   2  -5    0.60    1.50
   1  -2   6   20.40    3.30
  -1   2  -6   19.90    2.80
   1  -2   7   -2.10    2.60
  -1   2  -7    0.90    2.20
   1  -2   8  255.90   13.20
  -1   2  -8  244.10   11.40
   1  -2   9  187.80   10.30
  -1   2  -9  201.60   10.10
   1  -2  10   43.10    4.70
  -1   2 -10   33.60    3.50
   1  -2  11   -2.10    2.60
  -1   2 -11    2.60    3.60
   1  -2  12    6.70    2.80
  -1   2 -12    8.90    3.40
   1  -2  13   33.70    5.50
  -1   2 -13   30.00    5.50
   1  -2  14    8.10    3.60
  -1   2 -14    3.90    3.70
  -1   2 -15   64.00    7.00
  -1   2 -16   -2.60    3.80
  -1   2 -17   -3.80    5.50
  -1   2 -18   10.30    5.10
  -1   2 -19    1.50    4.90
  -1   2 -20    9.70    7.80
   1  -1 -21    9.20    9.20
   1  -1 -20   -2.10    5.70
   1  -1 -19    1.80    5.00
   1  -1 -18    7.10    6.10
   1  -1 -17    0.50    4.10
   1  -1 -16   12.40    4.00
   1  -1 -15   24.80    6.00
   1  -1 -14    9.00    4.00
  -1   1  14    6.80    4.50
   1  -1 -13   19.80    4.70
  -1   1  13   18.30    3.80
   1  -1 -12    8.70    4.40
  -1   1  12   -0.40    2.80
   1  -1 -11   44.60    4.50
  -1   1  11   52.80    5.30
   1  -1 -10    8.30    3.70
  -1   1  10   10.70    2.80
   1  -1  -9   56.70    4.70
  -1   1   9   68.80    4.90
   1  -1  -8  154.60    8.10
  -1   1   8  141.10   10.30
   1  -1  -7   13.50    2.90
  -1   1   7    7.60    2.10
   1  -1  -6  217.40    9.80
  -1   1   6  223.50    8.70
   1  -1  -5   98.60    5.00
  -1   1   5  108.30    6.30
   1  -1  -2   -0.50    0.60
   1  -1  -1    0.70    0.40
   1  -1   0    0.30    0.40
  -1   1   0    0.00    0.30
   1  -1   1    0.40    0.70
  -1   1  -1    3.40    0.90
   1  -1   3   14.40    4.80
   1  -1   4   42.10    2.60
  -1   1  -4   38.00    3.10
   1  -1   5   22.40    2.30
  -1   1  -5   22.60    2.90
   1  -1   6    0.80    2.50
  -1   1  -6    9.10    2.60
   1  -1   7   79.80    4.80
  -1   1  -7   69.70    5.00
   1  -1   8   54.60    5.70
  -1   1  -8   46.40    4.70
   1  -1   9   19.30    3.60
  -1   1  -9   26.60    2.90
   1  -1  10   33.90    4.00
  -1   1 -10   33.60    3.30
   1  -1  11   38.40    4.70
  -1   1 -11   37.30    4.90
   1  -1  12    1.50    3.00
  -1   1 -12   -0.50    2.80
   1  -1  13   36.90    5.70
  -1   1 -13   44.60    5.40
   1  -1  14    7.80    3.80
  -1   1 -14    3.90    4.60
  -1   1 -15    5.20    5.30
  -1   1 -16   10.60    3.80
  -1   1 -17    2.90    3.80
  -1   1 -18    3.50    6.20
  -1   1 -19    4.40    5.00
  -1   1 -20    7.90    5.90
   1   0 -21    1.00    5.00
   1   0 -20   29.90    8.70
   1   0 -19    7.90    5.80
   1   0 -18   14.70    5.10
   1   0 -17   -2.60    5.90
   1   0 -16    3.20    3.60
   1   0 -15   -1.40    5.40
   1   0 -14    6.50    3.60
  -1   0  14    8.60    3.30
   1   0 -13    0.60    3.10
  -1   0  13    0.20    4.30
   1   0 -12   -2.20    2.70
  -1   0  12    7.30    4.20
   1   0 -11   33.90    5.10
  -1   0  11   39.60    4.50
   1   0 -10   49.20    4.50
  -1   0  10   47.50    5.00
   1   0  -9  141.70    9.50
  -1   0   9  162.70    8.80
   1   0  -8   66.90    4.60
  -1   0   8   60.40    4.00
   1   0  -7   82.10    8.60
  -1   0   7  101.10   10.20
   1   0  -6   34.00    2.70
  -1   0   6   33.20    2.90
   1   0  -5  111.00    5.70
  -1   0   5   98.00    5.30
   1   0  -4  279.70   12.80
   1   0  -3    3.40    1.80
  -1   0   2   -0.60    0.60
   1   0  -1    0.20    0.40
  -1   0   1   -1.10    0.50
   1   0   1    0.30    0.20
  -1   0  -1   -0.20    0.20
   1   0   4 2198.10  207.40
   1   0   5   13.80    2.40
  -1   0  -5    6.00    2.20
   1   0   6   25.40    2.70
   1   0   7   82.20    5.00
  -1   0  -7   84.30    4.90
   1   0   8    2.00    2.00
  -1   0  -8   -2.40    2.20
   1   0   9  103.20    5.60
  -1   0  -9  103.20    6.80
   1   0  10   70.70    6.40
  -1   0 -10   64.50    5.00
   1   0  11   46.80    3.70
  -1   0 -11   44.40    4.10
   1   0  12   14.50    4.00
  -1   0 -12   15.20    3.40
   1   0  13   21.60    3.80
  -1   0 -13   23.30    5.40
   1   0  14    5.30    4.60
  -1   0 -14   -2.20    4.30
   1   0  15    6.50    3.70
  -1   0 -15   -3.80    3.20
  -1   0 -16   -0.80    3.30
  -1   0 -17    8.00    4.60
  -1   0 -18    9.20    6.00
  -1   0 -19    5.30    6.70
  -1   0 -20   27.20    5.50
  -1   0 -21   -2.20    5.50
   1   1 -20    1.60    4.50
   1   1 -19   11.00    6.60
   1   1 -18    2.20    4.90
   1   1 -17   39.00    7.10
   1   1 -16   -0.80    4.50
   1   1 -15    0.60    3.60
   1   1 -14    5.00    3.80
  -1  -1  14    6.70    3.80
   1   1 -13    4.40    3.70
  -1  -1  13    6.50    3.90
   1   1 -12   10.50    3.30
  -1  -1  12    0.70    2.90
   1   1 -11   -2.50    3.60
  -1  -1  11    2.00    2.70
   1   1 -10   18.40    4.20
  -1  -1  10    8.30    2.60
   1   1  -9   22.10    3.40
  -1  -1   9   19.30    2.80
   1   1  -8  211.00    9.30
  -1  -1   8  205.00    8.80
   1   1  -7   11.50    3.00
  -1  -1   7   15.30    3.80
   1   1  -6   10.70    3.00
  -1  -1   6    5.00    2.80
   1   1  -5   -0.60    2.20
  -1  -1   5   -1.80    1.80
   1   1  -4   58.70    4.10
  -1  -1   4   68.90    4.20
  -1  -1   3   -0.90    1.10
  -1  -1   1    0.90    0.60
   1   1   0   -0.60    0.40
  -1  -1   0   -1.50    0.70
   1   1   1   -0.20    0.20
   1   1   2    1.00    0.50
  -1  -1  -2    0.50    0.40
  -1  -1  -5 3295.40  170.80
   1   1   6    1.20    1.70
  -1  -1  -6   -1.40    2.30
   1   1   7   -0.10    1.70
  -1  -1  -7    1.90    1.90
   1   1   8    4.20    2.10
  -1  -1  -8    5.50    3.30
   1   1   9   26.50    4.30
  -1  -1  -9   22.70    3.50
   1   1  10    0.20    3.10
  -1  -1 -10    3.50    2.80
   1   1  11   16.50    3.00
  -1  -1 -11   21.10    3.70
   1   1  12   10.70    3.00
  -1  -1 -12   15.00    4.40
   1   1  13    4.40    3.80
  -1  -1 -13    9.00    5.10
   1   1  14    5.10    3.70
  -1  -1 -14    1.20    3.20
   1   1  15   -0.20    3.40
  -1  -1 -15    3.10    3.50
  -1  -1 -16    8.40    3.50
  -1  -1 -17    6.20    3.70
  -1  -1 -18    9.80    4.90
  -1  -1 -19   57.40    8.30
  -1  -1 -20   -6.50    6.60
  -1  -1 -21   -0.30    8.00
   1   2 -20   -5.10    7.80
   1   2 -19   10.00    6.30
   1   2 -18    5.90    7.70
   1   2 -17   21.70    5.30
   1   2 -16    8.60    5.90
   1   2 -15    3.80    4.40
   1   2 -14   -1.70    3.90
   1   2 -13   52.10    6.00
  -1  -2  13   52.00    5.50
   1   2 -12   79.60    6.20
  -1  -2  12   67.40    7.00
   1   2 -11    3.10    3.20
  -1  -2  11    4.10    2.50
   1   2 -10    0.10    2.50
  -1  -2  10    3.10    2.60
   1   2  -9   30.00    3.70
  -1  -2   9   22.10    4.00
   1   2  -8   16.60    2.90
  -1  -2   8   13.40    3.20
   1   2  -7   28.90    3.70
  -1  -2   7   27.00    4.30
   1   2  -6   56.80    4.70
  -1  -2   6   56.10    4.90
   1   2  -5    0.60    2.10
  -1  -2   5   -2.30    3.00
   1   2  -4   25.40    2.90
  -1  -2   4   19.20    2.40
   1   2  -3   25.40    4.40
  -1  -2   3   39.90    3.80
  -1  -2   1  667.20   35.00
   1   2   0   -0.20    0.60
   1   2   1    0.40    0.50
   1   2   4 2062.50  362.70
   1   2   5  607.90   25.20
  -1  -2  -5  580.00   23.20
   1   2   6 1450.10   61.90
  -1  -2  -6 1424.00   60.50
   1   2   7    7.50    3.60
  -1  -2  -7   11.70    2.50
   1   2   8   22.20    4.20
  -1  -2  -8   12.90    3.00
   1   2   9    8.50    2.60
  -1  -2  -9   14.60    3.00
   1   2  10  274.20   13.00
  -1  -2 -10  284.00   12.90
   1   2  11  115.70    7.70
  -1  -2 -11   97.40    5.90
   1   2  12   33.70    4.20
  -1  -2 -12   41.90    4.30
   1   2  13    2.70    2.90
  -1  -2 -13   -2.70    3.10
   1   2  14    0.60    3.10
  -1  -2 -14    6.40    3.50
   1   2  15    8.00    5.20
  -1  -2 -15   -1.20    3.00
  -1  -2 -16   72.50    7.40
  -1  -2 -17   35.50    5.70
  -1  -2 -18   -2.50    3.90
  -1  -2 -19   35.80    6.90
  -1  -2 -20   87.80    9.10
  -1  -2 -21   11.40    6.30
  -1  -2 -22   -2.70    5.20
   1   3 -19  -15.10    8.10
   1   3 -18    1.50    5.00
   1   3 -17    9.90    4.80
   1   3 -16  110.20   10.30
   1   3 -15   37.10    6.00
   1   3 -14  118.10   11.20
   1   3 -13   25.40    5.40
  -1  -3  13   20.40    5.00
   1   3 -12    5.20    3.90
  -1  -3  12   11.20    4.00
   1   3 -11    2.20    2.70
  -1  -3  11    5.10    3.70
   1   3 -10   63.10    5.00
  -1  -3  10   53.60    5.80
   1   3  -9   99.90   10.20
  -1  -3   9   93.40    5.70
   1   3  -8    0.00    4.20
  -1  -3   8   -2.90    3.70
   1   3  -7    8.90    2.90
  -1  -3   7    8.00    2.60
   1   3  -6   42.60    3.60
  -1  -3   6   42.00    3.80
   1   3  -5  280.40   13.40
  -1  -3   5  301.80   20.80
   1   3  -4    7.00    3.10
  -1  -3   4    9.20    3.00
   1   3  -3    2.50    2.30
  -1  -3   3    2.50    2.40
   1   3  -2  131.20    8.80
  -1  -3   2  149.10    6.70
  -1  -3   1   -1.30    1.50
  -1  -3  -4  455.90   26.30
   1   3   5 2442.00   95.50
   1   3   6   96.90    5.30
  -1  -3  -6   87.30    5.70
   1   3   7  270.80   11.60
  -1  -3  -7  248.00   12.70
   1   3   8   75.90    5.90
  -1  -3  -8   73.70    5.50
   1   3   9  283.80   11.40
  -1  -3  -9  281.10   12.70
   1   3  10  114.70    6.30
  -1  -3 -10  120.90    7.40
   1   3  11  205.90   10.30
  -1  -3 -11  186.40   10.40
   1   3  12    3.60    3.70
  -1  -3 -12    9.90    4.20
   1   3  13   -4.50    4.00
  -1  -3 -13    0.30    2.60
   1   3  14  129.60    9.00
  -1  -3 -14  114.70   10.30
   1   3  15    1.40    3.90
  -1  -3 -15    3.80    3.50
  -1  -3 -16   14.30    5.80
  -1  -3 -17    5.00    5.90
  -1  -3 -18   51.00    7.80
  -1  -3 -19    6.00    5.70
  -1  -3 -20   55.10    8.80
  -1  -3 -21    7.90    5.80
  -1  -3 -22   20.80    7.00
   1   4 -19   -0.70    5.60
   1   4 -18   -2.50    4.70
   1   4 -17    6.50    7.40
   1   4 -16   19.50    4.90
   1   4 -15  164.30   12.80
   1   4 -14   58.20    7.20
   1   4 -13   -0.10    3.60
   1   4 -12  275.30   16.10
  -1  -4  12  248.40   18.80
   1   4 -11    9.50    3.00
  -1  -4  11   -0.40    3.40
   1   4 -10   10.00    4.50
  -1  -4  10   17.60    4.80
   1   4  -9  162.00    9.50
  -1  -4   9  144.80    9.70
   1   4  -8  107.80    6.60
  -1  -4   8  103.30    7.00
   1   4  -7  125.70    7.40
  -1  -4   7  129.90    9.70
   1   4  -6  642.10   27.50
  -1  -4   6  631.20   26.30
   1   4  -5   67.20    3.80
  -1  -4   5   76.30    4.80
   1   4  -4  112.90    6.10
  -1  -4   4  129.40    6.80
   1   4  -3    9.20    2.20
  -1  -4   3    8.00    2.20
  -1  -4   2    3.50    1.50
  -1  -4   1   22.10    2.20
   1   4   0   14.50    2.40
  -1  -4   0   14.20    2.50
  -1  -4  -1   31.70    3.80
  -1  -4  -2  289.60   11.80
  -1  -4  -3  279.70    9.20
   1   4   4  577.60   13.40
  -1  -4  -4  580.10   30.10
   1   4   5  484.40   15.40
  -1  -4  -5  489.50   21.40
   1   4   6   31.90    3.80
  -1  -4  -6   40.70    3.60
   1   4   7   -2.00    2.20
  -1  -4  -7    2.70    0.60
   1   4   8   81.90    5.50
  -1  -4  -8   63.50   12.60
   1   4   9    1.30    3.40
  -1  -4  -9    6.90    3.20
   1   4  10  368.00   23.90
  -1  -4 -10  390.70   17.00
   1   4  11  378.40   15.60
  -1  -4 -11  382.10   17.10
   1   4  12   -0.50    3.80
  -1  -4 -12    2.80    2.60
   1   4  13   13.50    4.70
  -1  -4 -13   13.10    3.20
   1   4  14   16.40    3.20
  -1  -4 -14   13.00    4.00
   1   4  15  173.50   13.40
  -1  -4 -15  201.30   16.80
  -1  -4 -16    7.40    8.10
  -1  -4 -17   -0.70    4.10
  -1  -4 -18   -4.00    4.50
  -1  -4 -19   -3.30    4.10
  -1  -4 -20   20.60    6.20
  -1  -4 -21   -1.20    6.80
  -1  -4 -22    2.40    5.70
   1   5 -18   10.90    7.80
   1   5 -17   -5.90    4.90
   1   5 -16   25.90    5.30
   1   5 -15  174.90   14.90
   1   5 -14  111.40    9.90
   1   5 -13   35.30    4.80
   1   5 -12    0.40    3.20
  -1  -5  12   11.40    5.50
   1   5 -11   22.00    5.10
  -1  -5  11   10.20    3.90
   1   5 -10   24.00    5.50
  -1  -5  10   20.90    5.40
   1   5  -9    3.60    2.90
  -1  -5   9    0.90    2.70
   1   5  -8    9.80    4.00
  -1  -5   8    5.80    2.60
   1   5  -7  320.00   14.30
  -1  -5   7  303.20   15.80
   1   5  -6    0.00    2.30
  -1  -5   6    1.90    2.10
   1   5  -5  546.00   27.60
  -1  -5   5  554.70   21.50
   1   5  -4   40.60    4.00
  -1  -5   4   40.30    3.90
  -1  -5   3  172.80    6.30
  -1  -5   2  288.50    9.50
   1   5  -1   44.70    2.80
  -1  -5   1   44.10    2.30
   1   5   0  374.20   17.00
  -1  -5   0  367.50   15.10
   1   5   1  170.30    6.80
  -1  -5  -1  163.30    7.30
   1   5   2   -2.30    1.90
  -1  -5  -2   -6.60    2.90
   1   5   3   95.80    7.50
  -1  -5  -3   96.10    4.00
  -1  -5  -4   56.10    2.60
   1   5   5    0.70    1.10
   1   5   6   74.10   19.30
  -1  -5  -6  109.50   13.90
   1   5   7    1.90    3.10
  -1  -5  -7    1.30    1.10
   1   5   8   15.00    2.50
  -1  -5  -8   14.50    3.00
   1   5   9   28.30    3.70
  -1  -5  -9   34.20    1.40
   1   5  10    4.00    3.00
  -1  -5 -10    2.50    3.60
   1   5  11   61.30    4.80
  -1  -5 -11   67.00    6.90
   1   5  12  119.20    8.50
  -1  -5 -12  115.90    7.70
   1   5  13   -0.20    2.40
  -1  -5 -13    6.20    3.20
   1   5  14   21.40    3.70
  -1  -5 -14   24.10    4.70
   1   5  15  149.90   10.80
  -1  -5 -15  151.30   13.20
  -1  -5 -16   21.50    4.50
  -1  -5 -17   74.80    7.60
  -1  -5 -18    2.80    3.50
  -1  -5 -19    4.50    4.70
  -1  -5 -20   -2.90    7.10
  -1  -5 -21    9.40    7.70
  -1  -5 -22   32.20    9.80
   1   6 -17   -3.60    4.60
   1   6 -16   21.80    7.10
   1   6 -15    0.40    5.80
   1   6 -14   67.50    8.40
   1   6 -13    5.10    4.30
   1   6 -12    2.30    3.40
   1   6 -11   22.90    5.30
  -1  -6  11   25.30    6.00
   1   6 -10    2.40    3.30
  -1  -6  10    0.30    3.40
   1   6  -9    1.30    3.20
  -1  -6   9    0.40    3.20
   1   6  -8    3.70    3.10
  -1  -6   8    0.90    4.30
   1   6  -7   14.90    4.10
  -1  -6   7   17.40    4.50
   1   6  -6   44.90    4.60
  -1  -6   6   52.90    5.80
   1   6  -5  108.70    7.30
  -1  -6   5  103.50    4.40
  -1  -6   4   17.20    2.10
  -1  -6   3   34.10    2.30
  -1  -6   2   83.80    4.20
  -1  -6   1  116.00    4.50
   1   6   0   51.30    3.30
  -1  -6   0   51.70    3.80
   1   6   1    1.70    2.00
  -1  -6  -1    4.00    2.40
   1   6   2   30.80    3.50
  -1  -6  -2   29.50    3.00
  -1  -6  -3   -4.50    2.30
   1   6   4   53.40    4.30
  -1  -6  -4   53.50    2.70
   1   6   5   22.70    1.30
  -1  -6  -5   21.10    1.60
   1   6   6  212.30    7.90
  -1  -6  -6  213.40   12.10
   1   6   7  434.10   14.00
  -1  -6  -7  426.70   15.50
   1   6   8    7.10    1.40
  -1  -6  -8    4.20    0.60
   1   6   9    7.00    2.90
  -1  -6  -9   10.00    3.10
   1   6  10  114.90   10.80
  -1  -6 -10  117.00    7.50
   1   6  11    1.10    3.60
  -1  -6 -11    0.10    3.60
   1   6  12   -1.50    3.10
  -1  -6 -12    0.60    0.50
   1   6  13   -0.50    2.80
  -1  -6 -13   -1.60    3.20
   1   6  14  153.20   11.00
  -1  -6 -14  157.80    9.80
   1   6  15   47.80    6.20
  -1  -6 -15   42.70    6.00
  -1  -6 -16    0.00    3.40
  -1  -6 -17   19.00    6.20
  -1  -6 -18    7.60    4.40
  -1  -6 -19   23.50    6.50
  -1  -6 -20    2.60    4.60
  -1  -6 -21   16.50    6.30
  -1  -6 -22   -6.40    6.20
  -1  -6 -23    6.70    6.80
   1   7 -17    1.00    7.50
   1   7 -16   -1.00    5.50
   1   7 -15    2.10    4.70
   1   7 -14    3.60    4.50
   1   7 -13    7.90    4.00
   1   7 -12    0.80    3.70
   1   7 -11   18.00    6.20
  -1  -7  11   16.00    4.60
   1   7 -10    9.00    3.60
  -1  -7  10   18.40    5.50
   1   7  -9   53.40    5.50
  -1  -7   9   49.80    5.50
   1   7  -8    7.50    3.20
  -1  -7   8   12.20    3.60
   1   7  -7  105.20    7.10
  -1  -7   7  114.60    5.20
  -1  -7   6   79.20    3.80
  -1  -7   5   81.60    4.10
  -1  -7   4   52.00    3.30
  -1  -7   3   70.60    3.60
  -1  -7   2   52.50    3.20
  -1  -7   1   49.30    2.80
   1   7   0  617.50   25.10
  -1  -7   0  631.50   25.80
   1   7   1  301.00   12.60
  -1  -7  -1  323.40   18.40
   1   7   2    4.00    2.90
  -1  -7  -2    8.70    3.50
   1   7   3  115.50    5.20
  -1  -7  -3  110.30    5.50
   1   7   4    0.30    2.00
  -1  -7  -4    2.30    1.50
   1   7   5   67.10    2.60
  -1  -7  -5   73.70    3.40
   1   7   6   25.50    1.50
  -1  -7  -6   29.80    4.70
   1   7   7    1.30    1.30
  -1  -7  -7   -3.10    3.70
   1   7   8   11.50    1.70
  -1  -7  -8    9.40    3.80
   1   7   9  120.40    4.20
  -1  -7  -9  118.20    7.00
   1   7  10   -1.40    2.40
  -1  -7 -10   -1.00    0.60
   1   7  11    7.00    2.80
  -1  -7 -11    0.30    0.70
   1   7  12   -0.90    2.80
  -1  -7 -12    5.20    4.40
   1   7  13   -3.30    3.20
  -1  -7 -13    1.40    3.10
   1   7  14   15.70    5.70
  -1  -7 -14   12.30    4.20
   1   7  15   52.90    5.50
  -1  -7 -15   55.60    6.90
  -1  -7 -16    1.00    0.40
  -1  -7 -17    2.60    0.90
  -1  -7 -18   11.00    1.20
  -1  -7 -19   39.90    2.40
  -1  -7 -20   60.00   10.70
  -1  -7 -21    5.70    5.00
  -1  -7 -22    2.20    6.30
  -1  -7 -23    3.90    6.00
   1   8 -16    5.30    5.20
   1   8 -15   12.20    5.20
   1   8 -14   -2.60    4.30
   1   8 -13   -2.20    3.80
   1   8 -12    5.90    3.70
   1   8 -11   81.70    8.90
   1   8 -10  240.30   13.60
  -1  -8  10  244.60   11.40
   1   8  -9    9.10    3.40
  -1  -8   9   10.40    3.30
  -1  -8   8   40.70    3.70
  -1  -8   7    2.80    2.40
  -1  -8   6   16.40    2.60
  -1  -8   5   -1.80    1.50
  -1  -8   4   27.50    2.70
  -1  -8   3  109.40    6.40
  -1  -8   2    1.10    1.70
  -1  -8   1  408.80   11.30
   1   8   0    7.30    3.60
  -1  -8   0   10.50    3.80
   1   8   1   60.00    5.10
  -1  -8  -1   54.30    4.40
   1   8   2 1020.20   57.90
  -1  -8  -2  997.90   38.30
   1   8   3   18.20    3.90
  -1  -8  -3   32.00    4.20
   1   8   4   85.60    6.40
  -1  -8  -4   73.80    3.50
   1   8   5  116.30    6.10
  -1  -8  -5  128.70    4.70
   1   8   6   66.90    3.00
  -1  -8  -6   57.40    2.80
   1   8   7  185.20    6.10
  -1  -8  -7  193.10    9.90
   1   8   8   49.10    1.60
  -1  -8  -8   46.70    4.60
   1   8   9    2.10    1.10
  -1  -8  -9    1.30    3.40
   1   8  10    3.90    1.40
  -1  -8 -10    7.40    3.00
   1   8  11    3.10    1.60
  -1  -8 -11    5.90    2.90
   1   8  12    2.00    3.20
  -1  -8 -12   -0.10    0.70
   1   8  13    6.80    3.50
  -1  -8 -13    3.70    0.80
   1   8  14   -4.60    4.80
  -1  -8 -14    0.20    3.00
   1   8  15    9.80    3.60
  -1  -8 -15   17.20    4.80
  -1  -8 -16  243.20   17.90
  -1  -8 -17    7.40    5.60
  -1  -8 -18   12.50    4.50
  -1  -8 -19   43.00    6.30
  -1  -8 -20   19.30    8.20
  -1  -8 -21    9.20    7.80
  -1  -8 -22    5.00    5.50
  -1  -8 -23   13.60    6.80
  -1  -9  15    6.80    4.10
  -1  -9  14    0.80    3.90
  -1  -9  13   -5.70    4.40
  -1  -9  12    2.60    4.30
  -1  -9  11    1.60    3.70
  -1  -9  10   65.00    7.90
  -1  -9   9   11.50    3.00
  -1  -9   8  284.80   11.70
  -1  -9   7  238.60   10.50
  -1  -9   6   13.50    2.70
  -1  -9   5   36.60    2.80
  -1  -9   4  257.00    9.00
  -1  -9   3   25.20    2.60
  -1  -9   2   67.70    3.80
  -1  -9   1   -1.80    1.50
   1   9   0   15.00    3.60
  -1  -9   0   23.10    3.80
   1   9   1  280.80   12.20
  -1  -9  -1  299.40   14.20
   1   9   2    6.90    2.50
  -1  -9  -2   14.70    3.30
   1   9   3   54.70    4.50
  -1  -9  -3   53.90    3.90
   1   9   4    4.80    3.10
  -1  -9  -4    1.50    2.10
   1   9   5   69.40    4.50
  -1  -9  -5   71.20    3.20
   1   9   6    0.80    1.30
  -1  -9  -6    1.80    1.30
   1   9   7   11.80    1.50
  -1  -9  -7    7.60    4.00
   1   9   8    8.80    2.60
  -1  -9  -8    7.30    3.70
   1   9   9    4.40    0.50
  -1  -9  -9    0.20    2.70
   1   9  10    4.10    1.50
  -1  -9 -10    6.70    2.70
   1   9  11    0.40    1.50
  -1  -9 -11   -0.40    4.20
   1   9  12    5.60    1.50
  -1  -9 -12    1.10    3.10
   1   9  13   29.00    2.50
  -1  -9 -13   18.50    3.90
   1   9  14   34.40    2.50
  -1  -9 -14   27.70    1.70
   1   9  15    5.10    4.30
  -1  -9 -15    6.70    0.90
  -1  -9 -16    4.40    1.30
  -1  -9 -17    3.70    4.30
  -1  -9 -18    6.30    4.80
  -1  -9 -19   -4.80    3.80
  -1  -9 -20    2.60    4.60
  -1  -9 -21    3.20    7.20
  -1  -9 -22    4.60    8.50
  -1  -9 -23  -11.00    6.80
  -1 -10  14   11.20    6.80
  -1 -10  13    6.10    6.50
  -1 -10  12   -3.80    4.30
  -1 -10  11    3.60    4.10
  -1 -10  10   16.00    5.70
  -1 -10   9    2.60    3.50
  -1 -10   8   23.30    3.30
  -1 -10   7    1.60    3.10
  -1 -10   6  157.40    7.30
  -1 -10   5   18.80    2.60
  -1 -10   4    0.00    2.20
  -1 -10   3  674.70   21.40
  -1 -10   2    1.60    2.00
  -1 -10   1   69.40    4.30
   1  10   0   14.70    3.30
  -1 -10   0   19.20    4.10
   1  10   1   13.50    3.20
  -1 -10  -1   13.30    3.20
   1  10   2  225.00   12.20
  -1 -10  -2  231.30   10.60
   1  10   3    8.90    2.60
  -1 -10  -3   15.80    2.00
   1  10   4    0.90    2.10
  -1 -10  -4    3.70    2.00
   1  10   5  198.70   11.70
  -1 -10  -5  183.80    7.00
   1  10   6    8.10    1.70
  -1 -10  -6    8.00    1.70
   1  10   7   18.40    1.70
  -1 -10  -7   15.50    2.50
   1  10   8  167.80    7.10
  -1 -10  -8  170.90    9.10
   1  10   9    1.80    2.60
  -1 -10  -9    5.70    3.30
   1  10  10   14.20    2.20
  -1 -10 -10   13.10    3.80
   1  10  11   12.10    2.00
  -1 -10 -11   11.50    3.60
   1  10  12   45.90    3.10
  -1 -10 -12   38.60    4.40
   1  10  13    6.90    1.60
  -1 -10 -13   13.40    3.80
   1  10  14    6.10    1.70
  -1 -10 -14    3.50    5.40
   1  10  15   10.20    2.50
  -1 -10 -15    5.70    3.40
   1  10  16    5.60    1.90
  -1 -10 -16    5.30    4.20
  -1 -10 -17   21.00    1.60
  -1 -10 -18  148.30    7.40
  -1 -10 -19   15.10    4.90
  -1 -10 -20   -8.80    5.50
  -1 -10 -21    7.20    5.30
  -1 -10 -22    7.40    9.00
  -1 -10 -23   16.40   10.30
  -1 -11  13    1.40    7.00
  -1 -11  12    5.00    5.80
  -1 -11  11    2.30    4.50
  -1 -11  10   -3.20    4.90
  -1 -11   9    5.50    3.80
  -1 -11   8   27.80    5.70
  -1 -11   7   37.00    4.20
  -1 -11   6   -0.20    3.00
  -1 -11   5    6.40    3.30
  -1 -11   4   69.90    4.20
  -1 -11   3    3.60    2.70
  -1 -11   2    7.10    2.30
  -1 -11   1  112.60    5.00
   1  11   0    9.30    2.50
  -1 -11   0   10.90    2.10
   1  11   1   72.20    5.50
  -1 -11  -1   82.30    5.70
   1  11   2   30.00    3.60
  -1 -11  -2   31.10    4.30
   1  11   3   99.30    6.50
  -1 -11  -3  109.20    5.20
   1  11   4  146.70    9.30
  -1 -11  -4  135.70    5.20
   1  11   5    8.60    3.90
  -1 -11  -5   15.50    2.30
   1  11   6   54.50    3.40
  -1 -11  -6   47.00    3.60
   1  11   7    3.40    1.40
  -1 -11  -7   -1.20    1.70
   1  11   8    0.40    1.40
  -1 -11  -8    1.60    4.10
   1  11   9    4.50    3.80
  -1 -11  -9    2.00    2.80
   1  11  10   19.90    1.50
  -1 -11 -10   19.10    3.60
   1  11  11   13.30    3.80
  -1 -11 -11    9.00    3.10
   1  11  12    2.80    2.00
  -1 -11 -12    3.00    3.30
   1  11  13   18.90    2.20
  -1 -11 -13   12.70    4.20
   1  11  14    4.10    1.60
  -1 -11 -14    3.30    4.60
   1  11  15    6.30    2.60
  -1 -11 -15   16.00    4.60
   1  11  16   -2.10    1.50
  -1 -11 -16    2.20    5.60
   1  11  17    2.20    2.70
  -1 -11 -17    3.70    4.10
   1  11  18   -3.80    2.80
  -1 -11 -18    0.30    6.20
  -1 -11 -19   13.80    5.10
  -1 -11 -20   25.00    5.90
  -1 -11 -21   16.80    5.80
  -1 -11 -22    2.00    8.20
  -1 -11 -23   38.30   11.20
  -1 -12  12    9.40    7.10
  -1 -12  11   23.20    7.00
  -1 -12  10    0.10    3.90
  -1 -12   9   11.60    6.10
  -1 -12   8    9.60    5.00
  -1 -12   7    1.80    3.10
  -1 -12   6    7.20    2.80
  -1 -12   5    1.20    2.70
  -1 -12   4   21.80    3.50
  -1 -12   3   71.70    4.00
  -1 -12   2    6.80    3.00
  -1 -12   1   93.90    5.20
  -1 -12   0   12.20    2.70
   1  12   1    8.80    4.20
  -1 -12  -1    0.30    2.50
   1  12   2   13.80    3.80
  -1 -12  -2    7.00    2.90
   1  12   3  226.40   12.30
  -1 -12  -3  208.10    8.00
   1  12   4  247.30   15.50
  -1 -12  -4  232.60    7.40
   1  12   5  234.80   12.90
  -1 -12  -5  245.50    9.40
   1  12   6   10.10    1.90
  -1 -12  -6    8.70    1.80
   1  12   7   14.30    2.30
  -1 -12  -7    8.90    2.70
   1  12   8   11.00    1.90
  -1 -12  -8   14.00    3.60
   1  12   9    1.50    1.50
  -1 -12  -9    6.70    3.40
   1  12  10  105.60    8.70
  -1 -12 -10  120.30    9.10
   1  12  11    2.00    0.70
  -1 -12 -11    3.30    3.20
   1  12  12   -6.00    4.20
  -1 -12 -12    2.70    3.70
   1  12  13   79.80    5.90
  -1 -12 -13   84.60    7.50
   1  12  14    3.00    2.00
  -1 -12 -14   10.70    5.00
   1  12  15    6.50    2.10
  -1 -12 -15    9.50    4.70
   1  12  16   11.10    3.50
  -1 -12 -16   21.00    6.80
   1  12  17    4.10    3.40
  -1 -12 -17   -0.70    4.50
   1  12  18   10.70    2.60
  -1 -12 -18   15.60    6.60
  -1 -12 -19   25.10    5.70
  -1 -12 -20    2.50    5.60
  -1 -12 -21   -7.20    6.60
  -1 -12 -22   -4.50    9.50
  -1 -13  11    4.40    6.10
  -1 -13  10    4.50    4.40
  -1 -13   9   -0.60    5.10
  -1 -13   8    4.20    3.50
  -1 -13   7   10.50    4.40
  -1 -13   6    2.50    3.40
  -1 -13   5   -1.30    2.50
  -1 -13   4   30.70    3.40
  -1 -13   3    2.90    3.30
  -1 -13   2    2.40    2.60
  -1 -13   1   -2.70    2.20
  -1 -13   0    4.30    2.50
   1  13   1  646.50   33.70
  -1 -13  -1  646.30   30.00
   1  13   2   38.50    5.50
  -1 -13  -2   35.20    2.90
   1  13   3   33.60    4.20
  -1 -13  -3   33.70    3.30
   1  13   4   63.10    5.90
  -1 -13  -4   62.50    4.00
   1  13   5   38.00    4.80
  -1 -13  -5   37.00    3.30
   1  13   6   87.70    4.40
  -1 -13  -6   95.60    4.90
   1  13   7    2.90    2.10
  -1 -13  -7    0.40    1.80
   1  13   8   -2.00    1.80
  -1 -13  -8    3.10    2.00
   1  13   9   11.30    1.70
  -1 -13  -9   20.30    4.70
   1  13  10    3.80    3.40
  -1 -13 -10   -3.50    5.00
   1  13  11   -0.30    3.50
  -1 -13 -11   -3.50    4.60
   1  13  12    3.80    5.90
  -1 -13 -12    3.20    3.90
   1  13  13   -1.50    3.80
  -1 -13 -13    9.80    4.10
  -1 -13 -14   21.20    6.20
   1  13  15   18.20    3.00
  -1 -13 -15   19.20    5.50
   1  13  16   -1.70    2.60
  -1 -13 -16   -2.40    3.70
   1  13  17    6.00    3.30
  -1 -13 -17    5.10    4.40
  -1 -13 -18    8.00    6.30
  -1 -13 -19   -2.00    4.00
  -1 -13 -20    7.00    6.10
  -1 -13 -21   -6.10    7.80
  -1 -13 -22   18.80    7.50
  -1 -14   9   -1.30    3.80
  -1 -14   8    9.50    4.30
  -1 -14   7    2.90    5.10
  -1 -14   6   17.70    6.60
  -1 -14   5    1.30    5.20
  -1 -14   4    0.80    4.90
  -1 -14   3   10.00    2.70
  -1 -14   2   14.40    3.50
  -1 -14   1   24.70    3.40
  -1 -14   0   51.60    4.30
  -1 -14  -1  120.60    6.00
   1  14   2   43.30    4.80
  -1 -14  -2   53.90    4.10
   1  14   3  134.30    9.50
  -1 -14  -3  134.30    6.40
   1  14   4   23.70    4.10
  -1 -14  -4   32.60    3.60
   1  14   5  268.80   18.00
  -1 -14  -5  305.00   11.10
   1  14   6   50.30    3.50
  -1 -14  -6   46.60    3.70
   1  14   7   14.60    2.80
  -1 -14  -7   10.50    2.30
   1  14   8   79.30    4.20
  -1 -14  -8   83.00    4.30
   1  14   9    7.30    2.10
  -1 -14  -9    6.20    3.60
   1  14  10   21.50    5.40
  -1 -14 -10   15.80    3.70
   1  14  11   16.10    1.70
  -1 -14 -11   16.00    4.30
   1  14  12   11.40    1.40
  -1 -14 -12   13.60    5.20
  -1 -14 -13    2.10    4.40
  -1 -14 -14    3.00    4.70
  -1 -14 -15    9.30    5.90
  -1 -14 -16    9.90    4.60
  -1 -14 -17   10.60    7.00
  -1 -14 -18    5.10    4.70
  -1 -14 -19   15.50    6.00
  -1 -14 -20    8.50    7.20
  -1 -14 -21    4.70    5.80
  -1 -14 -22   -7.40    5.80
  -1 -15   8   10.70    6.60
  -1 -15   7   11.30    5.00
  -1 -15   6   -1.40    4.30
  -1 -15   5    5.70    4.10
  -1 -15   4    3.00    3.90
  -1 -15   3    7.00    4.80
  -1 -15   2    5.50    3.30
  -1 -15   1    4.00    2.80
  -1 -15   0   10.50    3.40
  -1 -15  -1    4.60    2.60
   1  15   2    5.70    4.80
  -1 -15  -2    3.40    2.70
   1  15   3   -0.30    3.00
  -1 -15  -3   -3.00    2.10
   1  15   4   -1.20    5.00
  -1 -15  -4    3.10    2.30
   1  15   5   19.80    4.10
  -1 -15  -5   28.10    3.40
   1  15   6  229.50    9.40
  -1 -15  -6  238.10    9.70
   1  15   7   38.00    3.20
  -1 -15  -7   32.00    3.20
   1  15   8   35.40    2.80
  -1 -15  -8   32.80    3.10
   1  15   9    3.40    2.30
  -1 -15  -9   -2.50    4.60
   1  15  10   17.90    2.20
  -1 -15 -10   15.40    5.90
   1  15  11   16.20    4.80
  -1 -15 -11   21.20    4.60
   1  15  12   19.70    2.00
  -1 -15 -12   19.30    5.10
  -1 -15 -13    3.80    5.30
  -1 -15 -14   42.50    6.30
  -1 -15 -15   49.70    6.90
  -1 -15 -16   -3.30    6.40
  -1 -15 -17   -1.90    4.50
  -1 -15 -18   21.70    6.40
  -1 -15 -19   10.20    7.30
  -1 -15 -20    6.80    5.10
  -1 -15 -21    1.00    5.70
  -1 -16   7   -6.10    4.80
  -1 -16   6   33.80    7.20
  -1 -16   5    8.30    5.80
  -1 -16   4    4.90    5.60
  -1 -16   3   41.80    6.30
  -1 -16   2    2.90    3.60
  -1 -16   1    9.50    3.50
  -1 -16   0   13.30    3.40
  -1 -16  -1    7.00    2.30
  -1 -16  -2   39.00    3.40
   1  16   3    0.30    3.30
  -1 -16  -3   10.20    3.90
   1  16   4    1.70    3.40
  -1 -16  -4   -1.70    2.50
   1  16   5   71.70    7.00
  -1 -16  -5   65.50    4.20
   1  16   6    0.60    2.10
  -1 -16  -6    0.10    2.40
   1  16   7   -0.50    2.70
  -1 -16  -7   -1.80    2.20
   1  16   8    9.80    2.20
  -1 -16  -8   15.30    3.10
   1  16   9    5.60    2.10
  -1 -16  -9    7.20    5.70
   1  16  10   -3.10    1.90
  -1 -16 -10    1.00    3.90
  -1 -16 -11   41.80    5.80
   1  16  12    0.50    2.20
  -1 -16 -12    6.60    6.00
   1  16  13    7.80    1.30
  -1 -16 -13   10.40    4.20
  -1 -16 -14   10.80    5.10
  -1 -16 -15   16.90    6.90
  -1 -16 -16   40.90    8.20
  -1 -16 -17    6.60    4.90
  -1 -16 -18   11.00    7.90
  -1 -16 -19    8.10    6.40
  -1 -16 -20   12.20    5.80
  -1 -17   5    9.80    4.80
  -1 -17   4   -3.80    3.80
  -1 -17   3    1.30    3.80
  -1 -17   2   28.00    4.10
  -1 -17   1    8.70    4.20
  -1 -17   0   -3.30    3.10
  -1 -17  -1    0.70    2.80
  -1 -17  -2   14.10    3.30
  -1 -17  -3   10.40    3.40
   1  17   4   -3.20    5.10
  -1 -17  -4   -3.50    2.50
   1  17   5   54.30    4.30
  -1 -17  -5   62.80    5.50
   1  17   6   68.80    5.20
  -1 -17  -6   74.30    5.50
   1  17   7    7.70    3.50
  -1 -17  -7   10.00    2.70
   1  17   8   19.50    3.40
  -1 -17  -8   21.80    3.10
   1  17   9    8.00    3.10
  -1 -17  -9   10.70    5.70
   1  17  10    2.80    2.60
  -1 -17 -10   14.70    4.40
  -1 -17 -11   30.20    5.90
   1  17  12   51.60    3.70
  -1 -17 -12   58.10    8.60
  -1 -17 -13    0.80    4.10
  -1 -17 -14   28.40    8.10
  -1 -17 -15   89.30    7.80
  -1 -17 -16   36.50    7.60
  -1 -17 -17    1.10    4.90
  -1 -17 -18    9.70    5.60
  -1 -17 -19   -1.90    8.80
  -1 -17 -20   17.30    6.40
  -1 -18   3    9.60    5.10
  -1 -18   2    0.80    3.40
  -1 -18   1   10.90    4.50
  -1 -18   0    7.00    3.00
  -1 -18  -1    2.30    2.60
  -1 -18  -2    0.70    3.20
  -1 -18  -3    4.60    2.60
  -1 -18  -4   -1.20    3.30
   1  18   5   11.60    4.30
  -1 -18  -5   23.20    3.30
   1  18   6   -1.00    3.60
  -1 -18  -6    1.40    3.10
   1  18   7    7.70    2.90
  -1 -18  -7    7.70    3.20
   1  18   8   15.90    5.10
  -1 -18  -8   25.50    3.70
  -1 -18  -9   17.10    6.00
  -1 -18 -10   56.10    5.60
  -1 -18 -11  118.20   11.30
  -1 -18 -12   20.70    5.70
  -1 -18 -13   17.20    5.20
  -1 -18 -14    2.10    5.40
  -1 -18 -15   52.40    8.70
  -1 -18 -16   15.70    6.30
  -1 -18 -17    9.00    7.80
  -1 -18 -18    9.90    6.60
  -1 -18 -19   51.20    8.70
  -1 -19   1   -3.00    3.50
  -1 -19   0    4.80    3.00
  -1 -19  -1  156.80   11.00
  -1 -19  -2    3.80    4.20
  -1 -19  -3    0.50    3.00
  -1 -19  -4   13.20    4.50
  -1 -19  -5    4.70    2.60
  -1 -19  -6   12.60    3.40
  -1 -19  -7    8.30    3.40
  -1 -19  -8   -4.70    3.10
  -1 -19  -9    0.60    3.90
  -1 -19 -10   10.90    6.90
  -1 -19 -11   42.70    6.50
  -1 -19 -12   41.70    6.40
  -1 -19 -13    9.60    7.00
  -1 -19 -14   13.50    5.90
  -1 -19 -15   -1.50    8.20
  -1 -19 -16   13.90    6.00
  -1 -19 -17   -0.10    6.00
  -1 -20  -2    2.50    4.20
  -1 -20  -3   10.30    3.30
  -1 -20  -4   -0.70    3.10
  -1 -20  -5    0.80    3.50
  -1 -20  -6   12.10    3.90
  -1 -20  -7    7.50    3.30
  -1 -20  -8    0.90    4.50
  -1 -20  -9    0.90    4.00
  -1 -20 -10   -1.90    7.30
  -1 -20 -11   26.60    5.70
  -1 -20 -12    3.20    7.20
  -1 -20 -13    0.10    7.70
  -1 -20 -14    0.20    5.70
  -1 -20 -15   12.40    8.60
  -1 -21  -7    3.90    3.90
  -1 -21  -8    5.80    3.60
  -1 -21  -9   10.70    6.20
  -1 -21 -10    3.10    5.10
  -1 -21 -11    8.40    5.40
   2 -20 -13    2.60    5.80
   2 -20 -12    0.50    5.60
   2 -20 -11   -2.60    3.70
   2 -20 -10    1.80    4.10
   2 -20  -9   -5.70    5.70
  -2  20   9    0.20    4.10
  -2  20   8    8.40    4.10
   2 -20  -5   21.40    6.80
   2 -20  -4   -8.30    6.10
   2 -19 -16   16.70    5.70
   2 -19 -15   -7.40    4.70
   2 -19 -14    3.70    4.20
   2 -19 -13    1.00    5.70
   2 -19 -12   18.00    6.20
   2 -19 -11    2.50    4.20
   2 -19 -10   30.50    6.20
  -2  19  10   24.80    4.60
   2 -19  -9    9.80    5.00
  -2  19   9    3.60    3.70
   2 -19  -8    0.70    3.10
  -2  19   8    5.20    3.90
   2 -19  -7   11.00    4.70
   2 -19  -6    0.60    3.00
   2 -19  -5    5.00    3.60
   2 -19  -4    9.40    7.30
   2 -19  -3    0.60    4.80
   2 -19  -2    3.90    6.90
   2 -19  -1   28.80    8.70
   2 -18 -17   -0.40    6.10
   2 -18 -16   -4.40    6.10
   2 -18 -15   14.80    5.60
   2 -18 -14   40.90    5.80
   2 -18 -13   12.10    4.80
   2 -18 -12   17.50    6.70
  -2  18  12   -0.50    2.50
   2 -18 -11    6.70    4.10
  -2  18  11    0.70    2.90
   2 -18 -10    2.20    5.00
  -2  18  10   -0.50    3.50
   2 -18  -9   10.20    4.90
  -2  18   9    6.80    3.20
   2 -18  -8    5.90    4.60
  -2  18   8    2.20    4.10
   2 -18  -7   -2.50    3.00
   2 -18  -6   66.40    6.60
   2 -18  -5    0.00    2.20
   2 -18  -4    8.50    2.80
   2 -18  -3   34.60    4.30
   2 -18  -2    8.50    3.10
   2 -18  -1    9.20    5.70
   2 -18   0   -6.40    5.50
   2 -18   1   11.80    8.10
   2 -18   2    8.70    6.50
   2 -17 -19    4.70    5.00
   2 -17 -18    2.20    5.60
   2 -17 -17    9.80    4.60
   2 -17 -16    4.90    4.90
   2 -17 -15   11.50    7.00
   2 -17 -14    6.60    5.20
   2 -17 -13   31.50    4.80
   2 -17 -12   38.00    6.50
  -2  17  12   29.20    3.90
   2 -17 -11   29.70    5.90
  -2  17  11   20.00    3.80
   2 -17 -10    0.10    3.30
  -2  17  10   -1.20    3.10
   2 -17  -9  153.20    9.40
  -2  17   9  127.30    5.10
   2 -17  -8   72.80    7.30
  -2  17   8   60.40    3.70
   2 -17  -7    9.90    3.20
  -2  17   7   15.50    3.70
   2 -17  -6    0.10    3.90
  -2  17   6   -1.00    3.00
   2 -17  -5    4.20    3.00
  -2  17   5    4.30    2.70
   2 -17  -4    5.70    1.90
  -2  17   4    6.40    3.10
   2 -17  -3   -4.60    3.40
   2 -17  -2   -0.70    2.90
   2 -17  -1   12.10    2.50
   2 -17   0    1.50    2.10
   2 -17   1    6.60    2.70
   2 -17   2    5.60    5.80
   2 -17   3   21.30    6.80
   2 -17   4   -0.30    4.80
   2 -16 -20    5.40    5.90
   2 -16 -19    4.20    6.50
   2 -16 -18   -8.20    6.70
   2 -16 -17    6.40    6.10
   2 -16 -16    3.50    3.80
   2 -16 -15    3.30    4.00
   2 -16 -14    2.70    4.60
   2 -16 -13   13.40    5.10
  -2  16  13    5.50    2.60
   2 -16 -12   11.20    3.50
  -2  16  12    9.60    2.90
   2 -16 -11    3.60    4.20
  -2  16  11    2.30    2.30
   2 -16 -10    4.70    3.20
  -2  16  10   11.80    3.30
   2 -16  -9   -4.00    4.00
  -2  16   9    2.50    2.00
   2 -16  -8    4.90    2.50
  -2  16   8    5.70    2.00
   2 -16  -7    8.70    2.30
  -2  16   7   12.10    2.40
   2 -16  -6   20.90    4.00
  -2  16   6   16.80    2.60
   2 -16  -5    4.40    2.60
  -2  16   5   -1.10    2.00
   2 -16  -4    2.20    3.20
  -2  16   4    9.70    2.70
   2 -16  -3    4.50    1.70
   2 -16  -2    4.00    1.80
   2 -16  -1   27.70    2.70
   2 -16   0   -1.10    2.30
   2 -16   1   -3.90    4.20
   2 -16   2    6.10    3.30
   2 -16   3   45.10    4.50
   2 -16   4   -1.30    2.20
   2 -16   5   -4.70    4.50
   2 -16   6    6.30    6.80
   2 -15 -20   -3.70    5.50
   2 -15 -19    4.60    5.50
   2 -15 -18   11.30    5.10
   2 -15 -17    1.20    4.00
   2 -15 -16    5.50    3.50
   2 -15 -15    3.10    4.40
   2 -15 -14   -5.90    3.00
  -2  15  14    3.10    5.60
   2 -15 -13   33.90    4.80
  -2  15  13   29.50    2.60
   2 -15 -12   25.10    5.30
  -2  15  12   29.10    2.80
   2 -15 -11   24.70    4.20
  -2  15  11   24.50    3.20
   2 -15 -10  128.10    8.50
  -2  15  10  126.80    6.10
   2 -15  -9    2.10    2.30
  -2  15   9    3.40    2.30
   2 -15  -8    0.70    2.30
  -2  15   8    2.40    2.10
   2 -15  -7    3.80    3.10
  -2  15   7    1.80    2.40
   2 -15  -6   11.60    3.60
  -2  15   6    6.60    2.60
   2 -15  -5    3.90    1.90
  -2  15   5   -2.00    2.30
   2 -15  -4    3.10    2.10
  -2  15   4   -1.60    1.90
   2 -15  -3   21.50    2.70
  -2  15   3   22.40    2.80
   2 -15  -2   30.40    2.40
   2 -15  -1    7.90    1.60
   2 -15   0   29.30    2.30
   2 -15   1   26.40    2.40
   2 -15   2   17.50    2.30
   2 -15   3    7.70    2.40
   2 -15   4    2.70    2.60
   2 -15   5    6.30    3.10
   2 -15   6    0.50    3.30
   2 -15   7   14.30    9.00
   2 -14 -21    1.10    5.00
   2 -14 -20    6.00    4.80
   2 -14 -19    2.30    5.00
   2 -14 -18   -8.60    4.70
   2 -14 -17   -2.80    5.50
   2 -14 -16   14.10    6.20
  -2  14  16    6.50    4.00
   2 -14 -15   31.20    5.00
  -2  14  15   23.20    4.20
   2 -14 -14   -2.40    3.00
  -2  14  14    1.20    3.00
   2 -14 -13   10.00    5.00
  -2  14  13    0.70    2.20
   2 -14 -12    3.60    3.50
  -2  14  12    1.60    1.90
   2 -14 -11   25.70    5.10
  -2  14  11   21.90    2.40
   2 -14 -10   -0.40    2.30
  -2  14  10    2.40    2.20
   2 -14  -9   60.70    5.50
  -2  14   9   65.80    4.20
   2 -14  -8   13.70    3.70
  -2  14   8    8.40    1.70
   2 -14  -7   45.80    9.40
  -2  14   7   25.80    3.30
   2 -14  -6  114.30    7.20
  -2  14   6   88.10    5.40
   2 -14  -5   -1.10    2.30
  -2  14   5    2.80    2.20
   2 -14  -4    2.70    1.90
  -2  14   4    5.20    1.80
   2 -14  -3   23.30    3.10
  -2  14   3   19.00    2.80
   2 -14  -2   23.50    2.00
  -2  14   2   28.90    4.50
   2 -14  -1   40.70    2.70
  -2  14   1   29.90    5.10
   2 -14   0    1.00    1.40
   2 -14   1   -0.30    1.70
   2 -14   2   61.50    3.00
   2 -14   3   12.10    2.40
   2 -14   4   -0.90    1.80
   2 -14   5   15.90    3.30
   2 -14   6    3.60    2.80
   2 -14   7    4.50    2.60
   2 -14   8    4.40    2.90
   2 -14   9    2.20    5.30
   2 -13 -21   18.40    8.60
   2 -13 -20    9.90    7.60
   2 -13 -19   14.60    7.10
   2 -13 -18   -1.40    2.50
   2 -13 -17   11.80    2.70
  -2  13  17   16.40    4.10
   2 -13 -16   -1.70    2.00
  -2  13  16    8.90    5.20
   2 -13 -15   -2.20    3.20
  -2  13  15    0.40    4.20
   2 -13 -14   34.80    5.10
  -2  13  14   35.00    4.30
   2 -13 -13   16.30    5.00
  -2  13  13    5.20    2.50
   2 -13 -12    8.60    3.00
  -2  13  12    6.10    1.60
   2 -13 -11   -1.60    4.50
  -2  13  11   -2.30    1.60
   2 -13 -10    0.00    2.30
  -2  13  10   -1.60    1.80
   2 -13  -9   16.80    3.40
  -2  13   9   18.20    2.20
   2 -13  -8   49.20    5.10
  -2  13   8   49.80    3.00
   2 -13  -7    9.20    2.30
  -2  13   7    3.50    2.00
   2 -13  -6    5.90    2.30
  -2  13   6    4.50    2.20
   2 -13  -5   68.40    4.10
  -2  13   5   62.20    3.60
   2 -13  -4   86.30    4.80
  -2  13   4   98.10    5.00
   2 -13  -3    9.50    2.60
  -2  13   3    9.40    2.30
   2 -13  -2  139.80    6.10
  -2  13   2  123.70    5.50
   2 -13  -1    1.90    1.90
  -2  13   1    4.70    3.30
   2 -13   0   52.20    2.60
   2 -13   1   71.60    3.50
   2 -13   2   31.60    2.50
   2 -13   3   25.10    2.30
   2 -13   4    3.60    2.00
   2 -13   5    7.40    1.90
   2 -13   6    1.20    2.20
   2 -13   7    2.40    2.30
   2 -13   8    7.90    3.10
   2 -13   9    5.20    3.00
   2 -13  10    8.20    4.90
   2 -12 -22   -3.20    9.20
   2 -12 -21   12.50    7.50
   2 -12 -20   10.50    7.10
   2 -12 -19    1.70    2.60
   2 -12 -18    3.00    2.30
  -2  12  18    1.30    4.60
   2 -12 -17   35.40    3.40
  -2  12  17   30.20    4.80
   2 -12 -16    2.80    2.30
  -2  12  16    2.00    3.30
   2 -12 -15    2.90    2.00
  -2  12  15   11.40    3.20
   2 -12 -14    2.80    2.20
  -2  12  14    2.30    1.90
   2 -12 -13    0.30    1.50
  -2  12  13   -1.30    2.30
   2 -12 -12    3.90    3.00
  -2  12  12    5.90    4.30
   2 -12 -11    2.00    4.00
  -2  12  11    2.30    1.30
   2 -12 -10    0.40    3.00
  -2  12  10    2.50    1.60
   2 -12  -9    1.30    2.50
  -2  12   9    2.80    1.40
   2 -12  -8    1.30    2.00
  -2  12   8    5.10    1.90
   2 -12  -7   -0.70    2.40
  -2  12   7    1.10    1.40
   2 -12  -6   30.30    4.00
  -2  12   6   22.50    2.40
   2 -12  -5    7.00    2.10
  -2  12   5    5.20    1.90
   2 -12  -4   -5.30    2.20
  -2  12   4   -3.40    2.00
   2 -12  -3   99.80    5.10
  -2  12   3  107.40    5.20
   2 -12  -2   -2.10    3.50
  -2  12   2    2.50    1.40
   2 -12  -1  252.40    7.70
  -2  12   1  248.60   11.80
   2 -12   0  929.80   24.70
   2 -12   1   -0.30    1.30
   2 -12   2  164.80    5.50
   2 -12   3  269.90    7.70
   2 -12   4   35.90    2.60
   2 -12   5   -1.10    1.90
   2 -12   6   23.70    2.80
   2 -12   7    1.60    2.70
   2 -12   8   19.30    3.40
   2 -12   9   -1.10    3.90
   2 -12  10    3.00    2.90
   2 -12  11   13.20    5.10
   2 -11 -22    4.00    6.10
   2 -11 -21   -5.30    5.20
   2 -11 -20    4.80    2.30
   2 -11 -19    5.30    2.80
   2 -11 -18   42.80    3.70
   2 -11 -17    3.70    2.30
   2 -11 -16    0.90    2.10
   2 -11 -15   25.70    2.30
  -2  11  15   23.00    3.20
   2 -11 -14    3.80    2.00
  -2  11  14   -1.40    2.40
   2 -11 -13   59.20    3.70
  -2  11  13   66.30    4.40
   2 -11 -12   38.60    2.80
  -2  11  12   29.00    2.90
   2 -11 -11    0.00    2.10
  -2  11  11    3.30    1.50
   2 -11 -10   34.70    4.20
  -2  11  10   32.50    2.10
   2 -11  -9    8.80    2.30
  -2  11   9    5.50    1.40
   2 -11  -8   40.00    3.80
  -2  11   8   44.60    2.50
   2 -11  -7    3.20    2.40
  -2  11   7    0.80    1.00
   2 -11  -6    4.10    2.90
  -2  11   6    1.10    1.40
   2 -11  -5   -2.00    1.40
  -2  11   5   -3.40    1.90
   2 -11  -4   -1.60    1.50
  -2  11   4    1.80    1.60
   2 -11  -3    2.90    1.80
  -2  11   3    4.50    1.70
   2 -11  -2    2.40    1.90
  -2  11   2    1.70    1.40
   2 -11  -1    2.90    1.60
  -2  11   1   -2.20    3.70
   2 -11   0    1.70    1.20
   2 -11   1  166.30    5.30
   2 -11   2   91.30    3.40
   2 -11   3    4.50    1.40
   2 -11   4   83.20    3.30
   2 -11   5    2.30    2.20
   2 -11   6  124.50    6.10
   2 -11   7    4.80    2.50
   2 -11   8    0.00    2.70
   2 -11   9   -1.70    2.50
   2 -11  10   28.30    5.90
   2 -11  11    3.40    3.60
   2 -11  12    6.80    4.80
   2 -11  13    9.60    5.70
   2 -10 -22   20.90    6.20
   2 -10 -21   22.30    5.80
   2 -10 -20    0.90    4.70
   2 -10 -19   -2.20    4.40
   2 -10 -18   -2.70    2.20
   2 -10 -17   20.10    2.80
   2 -10 -16   64.60    4.40
   2 -10 -15   26.70    2.80
  -2  10  15   23.80    4.10
   2 -10 -14    2.10    1.60
  -2  10  14   -1.30    4.90
   2 -10 -13  240.80    9.30
  -2  10  13  252.50   16.10
   2 -10 -12    2.60    1.90
  -2  10  12    5.60    1.90
   2 -10 -11  197.30    7.90
  -2  10  11  199.90    8.20
   2 -10 -10    7.40    2.00
  -2  10  10    5.70    1.40
   2 -10  -9   14.70    2.20
  -2  10   9   14.00    1.30
   2 -10  -8    7.70    3.20
  -2  10   8    6.60    1.20
   2 -10  -7   12.40    3.20
  -2  10   7   10.40    1.40
   2 -10  -6   26.90    3.00
  -2  10   6   24.20    1.80
   2 -10  -5  114.10    6.50
  -2  10   5  121.90    5.20
   2 -10  -4   73.40    3.50
  -2  10   4   72.10    3.50
   2 -10  -3  155.00    6.40
  -2  10   3  165.40    5.40
   2 -10  -2   10.80    2.20
  -2  10   2    8.30    1.70
   2 -10  -1   40.70    3.00
  -2  10   1   36.90    2.80
   2 -10   0   15.00    1.30
   2 -10   1    3.10    1.50
   2 -10   2   53.60    2.40
   2 -10   3  184.90    6.00
   2 -10   4   31.70    2.70
   2 -10   5   51.50    3.40
   2 -10   6  110.90    5.10
   2 -10   7    4.00    1.80
   2 -10   8   11.70    3.20
   2 -10   9    8.10    2.20
   2 -10  10    7.80    3.40
   2 -10  11   10.80    3.20
   2 -10  12    8.10    5.30
   2 -10  13   -5.60    5.80
   2 -10  14    7.40    4.30
   2  -9 -22   11.90    7.10
   2  -9 -21    5.90    6.40
   2  -9 -20   23.10    6.10
   2  -9 -19    4.70    5.30
   2  -9 -18   28.30    5.60
   2  -9 -17    7.30    4.90
   2  -9 -16    0.00    4.10
   2  -9 -15   40.30    6.00
  -2   9  15   32.50    5.00
   2  -9 -14    1.70    1.60
  -2   9  14    5.00    3.60
   2  -9 -13   25.60    2.70
  -2   9  13   19.60    3.80
   2  -9 -12   95.80    4.50
  -2   9  12  118.00    8.40
   2  -9 -11    6.70    1.60
  -2   9  11    5.30    3.80
   2  -9 -10    2.00    2.10
  -2   9  10   -0.60    1.50
   2  -9  -9   12.60    1.90
  -2   9   9    6.10    1.60
   2  -9  -8    1.40    1.30
  -2   9   8    1.30    1.30
   2  -9  -7   22.40    2.50
  -2   9   7   26.60    1.90
   2  -9  -6    1.90    2.50
  -2   9   6   -0.50    1.10
   2  -9  -5   10.10    2.00
  -2   9   5    5.60    1.40
   2  -9  -4    0.30    1.70
  -2   9   4   -1.70    1.40
   2  -9  -3    1.50    1.60
  -2   9   3    0.60    1.40
   2  -9  -2   65.50    3.00
  -2   9   2   83.10    3.50
   2  -9  -1    0.90    1.70
  -2   9   1    7.30    1.70
   2  -9   0   -0.10    1.00
   2  -9   1  192.40    5.20
   2  -9   2    2.30    1.30
   2  -9   3    4.90    1.20
   2  -9   4    2.80    1.70
   2  -9   5    2.00    1.60
   2  -9   6  212.60    8.50
   2  -9   7  111.30    5.10
   2  -9   8    0.30    2.20
   2  -9   9  108.00    6.40
   2  -9  10   28.00    3.30
   2  -9  11   39.10    4.10
   2  -9  12   46.10    6.20
  -2   9 -12   34.00    5.60
   2  -9  13    8.80    4.40
  -2   9 -13   18.10    3.90
   2  -9  14   -0.60    3.30
  -2   9 -14   -0.90    4.20
   2  -9  15   -0.60    3.80
  -2   9 -15   -1.10    3.60
   2  -8 -22    6.00    6.50
   2  -8 -21   19.00    7.40
   2  -8 -20   10.70    5.90
   2  -8 -19    5.00    6.50
   2  -8 -18   -0.20    1.40
   2  -8 -17    0.80    1.30
   2  -8 -16   30.10    2.30
   2  -8 -15    0.60    1.40
  -2   8  15    4.20    4.00
   2  -8 -14   14.20    1.50
  -2   8  14   10.30    3.30
   2  -8 -13    6.50    1.40
  -2   8  13    6.20    4.10
   2  -8 -12    2.90    2.90
  -2   8  12    4.80    3.30
   2  -8 -11   49.30    3.10
  -2   8  11   54.20    4.60
   2  -8 -10   13.90    1.90
  -2   8  10    8.20    3.00
   2  -8  -9   31.30    2.30
  -2   8   9   36.20    3.50
   2  -8  -8    5.90    1.30
  -2   8   8    5.50    1.50
   2  -8  -7    0.30    1.40
  -2   8   7    2.80    1.40
   2  -8  -6   47.40    2.60
  -2   8   6   46.70    2.00
   2  -8  -5    1.50    1.40
  -2   8   5    0.10    1.10
   2  -8  -4   -0.20    2.00
  -2   8   4    0.30    1.00
   2  -8  -3  181.00    6.50
  -2   8   3  186.00    5.80
   2  -8  -2    4.50    1.50
  -2   8   2    4.30    1.30
   2  -8  -1   13.60    1.60
  -2   8   1   12.20    1.50
   2  -8   0    5.70    1.20
   2  -8   1    3.40    1.00
   2  -8   2   22.90    1.70
   2  -8   3    1.90    1.40
   2  -8   4    0.30    1.50
   2  -8   5    0.60    1.20
   2  -8   6   36.90    2.70
   2  -8   7    9.40    1.60
   2  -8   8  311.80   12.20
  -2   8  -8  324.10   14.30
   2  -8   9    4.30    2.90
  -2   8  -9   -3.00    2.50
   2  -8  10   58.50    6.50
  -2   8 -10   63.20    6.40
   2  -8  11   51.70    6.10
  -2   8 -11   55.60    5.70
   2  -8  12   21.20    4.90
  -2   8 -12   29.60    5.30
  -2   8 -13   -0.80    5.40
  -2   8 -14  112.80   11.40
  -2   8 -15    1.80    4.10
  -2   8 -16   -3.30    4.40
   2  -7 -22    5.80    6.60
   2  -7 -21    2.30    5.50
   2  -7 -20    1.50    6.80
   2  -7 -19    2.10    5.70
   2  -7 -18    9.00    1.70
   2  -7 -17   11.10    2.10
   2  -7 -16   11.00    1.90
   2  -7 -15    3.90    1.60
  -2   7  15    7.40    4.20
   2  -7 -14    2.90    1.60
  -2   7  14    3.70    3.80
   2  -7 -13    6.20    1.70
  -2   7  13   20.90    4.00
   2  -7 -12  296.50   10.70
  -2   7  12  332.70   21.30
   2  -7 -11   -1.10    1.30
  -2   7  11   -4.10    2.30
   2  -7 -10   27.50    1.80
  -2   7  10   28.10    2.90
   2  -7  -9  362.50   11.70
  -2   7   9  344.30   13.50
   2  -7  -8   -1.40    1.30
  -2   7   8    2.00    1.50
   2  -7  -7    6.50    1.50
  -2   7   7    2.90    1.10
   2  -7  -6   -2.30    1.10
  -2   7   6   -0.20    1.10
   2  -7  -5   37.40    2.30
  -2   7   5   38.30    1.70
   2  -7  -4 1210.70   51.30
  -2   7   4 1250.10   24.80
   2  -7  -3   75.20    3.10
  -2   7   3   75.50    2.70
   2  -7  -2  115.50    5.20
  -2   7   2  109.60    4.10
   2  -7  -1  357.40   14.10
  -2   7   1  479.80   18.60
   2  -7   0   86.10    2.60
   2  -7   1    8.30    1.20
   2  -7   2   64.50    2.40
   2  -7   3   26.70    1.90
   2  -7   4    6.80    1.50
   2  -7   5    7.40    1.40
   2  -7   6   93.40    4.70
  -2   7  -6   93.30    5.50
   2  -7   7   78.70    5.90
  -2   7  -7   73.00    4.40
   2  -7   8    2.80    2.60
  -2   7  -8   -1.30    1.90
   2  -7   9   22.40    4.20
  -2   7  -9   12.60    2.70
   2  -7  10    6.40    2.70
  -2   7 -10    8.20    2.90
   2  -7  11    2.20    3.40
  -2   7 -11    3.10    4.10
   2  -7  12   14.50    4.50
  -2   7 -12   13.00    4.60
  -2   7 -13   -5.50    4.60
  -2   7 -14   19.60    6.50
  -2   7 -15    5.90    5.80
  -2   7 -16   18.50    5.00
   2  -6 -22   11.80    7.00
   2  -6 -21    5.80    9.20
   2  -6 -20   13.30    7.20
   2  -6 -19    3.90    4.00
   2  -6 -18    1.40    1.70
   2  -6 -17   32.40    2.90
   2  -6 -16   10.00    2.10
   2  -6 -15    2.00    1.80
  -2   6  15    3.20    3.90
   2  -6 -14  131.30    6.60
  -2   6  14  128.20   10.10
   2  -6 -13   25.30    2.30
  -2   6  13   22.90    4.20
   2  -6 -12    4.60    1.10
  -2   6  12   -0.30    2.80
   2  -6 -11  163.10    5.30
  -2   6  11  164.90    9.90
   2  -6 -10    1.30    1.00
  -2   6  10    0.50    2.20
   2  -6  -9   47.20    2.40
  -2   6   9   54.10    4.90
   2  -6  -8    6.80    1.60
  -2   6   8   10.40    3.60
   2  -6  -7   24.10    2.00
  -2   6   7   25.10    2.20
   2  -6  -6    0.80    1.40
  -2   6   6    1.00    1.30
   2  -6  -5  133.60    4.70
  -2   6   5  127.70    3.80
   2  -6  -4   30.10    2.30
  -2   6   4   30.00    1.30
   2  -6  -3 1054.70   55.10
  -2   6   3 1019.70   25.40
   2  -6  -2  455.10   13.20
  -2   6   2  475.90   12.40
   2  -6  -1  507.60   17.40
  -2   6   1  488.80   14.30
   2  -6   0  897.80   21.50
  -2   6   0  965.50   40.40
   2  -6   1   30.40    1.40
   2  -6   2   52.00    1.90
   2  -6   3   13.60    1.40
   2  -6   4    3.70    1.00
  -2   6  -4    1.40    1.50
   2  -6   5    6.70    2.00
  -2   6  -5    7.50    2.50
   2  -6   6    2.50    2.00
  -2   6  -6    2.00    1.70
   2  -6   7   31.20    3.00
  -2   6  -7   27.70    3.40
   2  -6   8   86.20    7.00
  -2   6  -8   94.80    5.50
   2  -6   9   -0.30    3.20
  -2   6  -9    0.10    3.10
   2  -6  10    6.70    4.40
  -2   6 -10   20.30    3.10
   2  -6  11    7.50    3.30
  -2   6 -11   12.30    3.20
   2  -6  12   -0.50    2.70
  -2   6 -12   -0.50    2.40
   2  -6  13   30.50    5.40
  -2   6 -13   36.10    6.30
  -2   6 -14   89.40    9.60
  -2   6 -15    6.00    5.90
  -2   6 -16   20.30    6.80
  -2   6 -17    0.40    4.50
   2  -5 -22  -10.80    7.80
   2  -5 -21    2.50    8.50
   2  -5 -20   21.20    5.60
   2  -5 -19   -6.40    4.00
   2  -5 -18    3.90    4.90
   2  -5 -17   13.70    5.90
   2  -5 -16    8.10    4.30
   2  -5 -15    7.50    3.50
  -2   5  15   -1.50    3.30
   2  -5 -14    3.70    3.60
  -2   5  14    5.80    3.10
   2  -5 -13    6.80    2.50
  -2   5  13   11.30    3.40
   2  -5 -12   29.30    2.50
  -2   5  12   30.30    4.40
   2  -5 -11  335.80   12.00
  -2   5  11  310.40   16.30
   2  -5 -10    0.60    1.70
  -2   5  10    3.80    2.50
   2  -5  -9 1380.20   39.60
  -2   5   9 1398.50   50.50
   2  -5  -8   71.60    3.00
  -2   5   8   60.90    4.30
   2  -5  -7  396.80   12.00
  -2   5   7  392.40   16.70
   2  -5  -6  232.30    5.60
  -2   5   6  240.10    9.00
   2  -5  -5   21.10    1.90
  -2   5   5   19.80    2.10
   2  -5  -4  335.40   11.00
  -2   5   4  342.80    8.40
   2  -5  -3  113.70    4.60
  -2   5   3  117.10    3.00
   2  -5  -2  152.30    4.10
  -2   5   2  157.70    4.00
   2  -5  -1  232.80    8.00
  -2   5   1  230.60    5.60
   2  -5   0    3.60    0.60
  -2   5   0    5.60    2.40
   2  -5   1    7.00    0.90
   2  -5   2   81.40    2.70
   2  -5   3  113.10    6.20
  -2   5  -3  110.90    5.10
   2  -5   4   53.40    3.40
  -2   5  -4   64.40    4.30
   2  -5   5   16.90    2.00
  -2   5  -5   11.70    2.40
   2  -5   6    2.20    1.60
  -2   5  -6    5.60    1.80
   2  -5   7   10.90    2.20
  -2   5  -7    9.30    2.20
   2  -5   8   18.30    3.50
  -2   5  -8   25.60    3.90
   2  -5   9   20.90    3.70
  -2   5  -9    7.70    2.40
   2  -5  10   50.80    6.30
  -2   5 -10   42.00    4.00
   2  -5  11    8.60    4.00
  -2   5 -11    9.10    3.30
   2  -5  12   11.20    5.20
  -2   5 -12   13.00    3.50
   2  -5  13    2.90    5.20
  -2   5 -13    6.90    4.90
  -2   5 -14    0.70    3.30
  -2   5 -15    4.80    3.70
  -2   5 -16    0.10    5.80
  -2   5 -17    2.80    4.20
  -2   5 -18   -4.10    6.50
   2  -4 -22    2.50    8.60
   2  -4 -21   -3.50    6.50
   2  -4 -20   -0.20    5.00
   2  -4 -19   32.10    8.00
   2  -4 -18   12.20    5.80
   2  -4 -17    6.40    4.60
   2  -4 -16   18.80    4.60
   2  -4 -15    7.30    4.90
  -2   4  15   11.30    3.50
   2  -4 -14   12.10    5.10
  -2   4  14    9.50    3.80
   2  -4 -13    6.50    3.60
  -2   4  13    0.40    2.60
   2  -4 -12    1.80    3.70
  -2   4  12    3.10    3.60
   2  -4 -11   63.00    5.30
  -2   4  11   73.60    6.90
   2  -4 -10   28.50    4.10
  -2   4  10   24.20    4.10
   2  -4  -9    6.40    2.00
  -2   4   9    3.70    3.00
   2  -4  -8   28.80    2.20
  -2   4   8   38.30    4.50
   2  -4  -7  108.10    4.50
  -2   4   7  124.50    6.50
   2  -4  -6  350.20   11.90
  -2   4   6  349.10   13.80
   2  -4  -5 1289.80   37.50
  -2   4   5 1245.30   34.50
   2  -4  -4  349.10    8.60
  -2   4   4  334.00   11.90
   2  -4  -3  127.40    4.40
  -2   4   3  124.70    3.60
   2  -4  -2   62.50    2.60
  -2   4   2   66.50    2.30
   2  -4  -1   35.70    1.50
  -2   4   1   37.10    1.70
   2  -4   0   24.50    1.30
  -2   4   0   22.70    1.90
   2  -4   1    4.00    0.70
   2  -4   2  144.30    5.50
  -2   4  -2  142.80    6.70
   2  -4   3  205.10    9.00
  -2   4  -3  210.10    9.40
   2  -4   4   80.70    3.90
  -2   4  -4   89.20    4.60
   2  -4   5    8.90    2.20
  -2   4  -5   11.00    1.80
   2  -4   6   98.80    5.40
  -2   4  -6  103.20    5.20
   2  -4   7    1.70    1.50
   2  -4   8    5.80    2.60
  -2   4  -8    6.20    2.60
   2  -4   9   42.90    4.20
  -2   4  -9   37.00    3.90
   2  -4  10   19.30    3.40
  -2   4 -10   24.70    3.60
   2  -4  11   26.20    4.80
  -2   4 -11   40.20    5.60
   2  -4  12   37.90    5.90
  -2   4 -12   43.30    5.90
   2  -4  13   21.50    3.90
  -2   4 -13   18.60    3.60
   2  -4  14   26.50    4.70
  -2   4 -14   29.40    5.50
  -2   4 -15    1.40    3.80
  -2   4 -16    5.60    4.20
  -2   4 -17   -3.00    3.90
  -2   4 -18   10.30    7.00
  -2   4 -19    8.30    5.10
   2  -3 -22    6.30    6.20
   2  -3 -21   -5.20    5.80
   2  -3 -20    2.50    7.50
   2  -3 -19   -6.90    5.10
   2  -3 -18   -0.20    4.40
   2  -3 -17    1.40    5.60
   2  -3 -16   11.10    3.60
   2  -3 -15    0.50    3.40
  -2   3  15   -1.80    3.40
   2  -3 -14   13.80    4.00
  -2   3  14   10.10    5.20
   2  -3 -13    2.40    2.70
  -2   3  13   -2.10    2.80
   2  -3 -12   15.30    3.10
  -2   3  12   16.70    3.30
   2  -3 -11   38.20    4.10
  -2   3  11   35.40    3.60
   2  -3 -10   57.90    5.50
  -2   3  10   58.00    4.40
   2  -3  -9  349.70   14.90
  -2   3   9  365.30   28.30
   2  -3  -8  208.00    9.20
  -2   3   8  195.00    9.70
   2  -3  -7  384.60   17.40
  -2   3   7  390.90   17.20
   2  -3  -6  300.30   10.60
  -2   3   6  311.30   11.80
   2  -3  -5 1052.00   43.20
  -2   3   5 1108.50   75.40
   2  -3  -4 2380.00   73.10
  -2   3   4 2376.90  147.90
   2  -3  -3  115.60    3.30
  -2   3   3  111.80    3.80
   2  -3  -2   38.90    3.10
  -2   3   2   43.90    2.00
   2  -3  -1   15.40    3.20
  -2   3   1   21.20    1.20
   2  -3   0  117.60    7.80
  -2   3   0  113.60    3.90
   2  -3   1   20.00    1.20
  -2   3  -1   14.50    2.20
   2  -3   2   19.40    1.30
  -2   3  -2   16.20    1.50
   2  -3   3   30.50    1.90
  -2   3  -3   26.80    2.20
   2  -3   4  121.10    5.80
  -2   3  -4  111.30    5.80
   2  -3   5   -1.70    1.90
  -2   3  -5    4.10    1.40
   2  -3   6  388.90   16.30
  -2   3  -6  385.70   20.00
   2  -3   7  341.40   14.10
  -2   3  -7  343.60   17.20
   2  -3   8    9.50    2.80
  -2   3  -8    8.50    2.90
   2  -3   9   23.40    3.80
  -2   3  -9   30.20    3.70
   2  -3  10   -0.50    2.20
  -2   3 -10    2.80    2.30
   2  -3  11    1.50    2.40
  -2   3 -11    1.90    3.60
   2  -3  12   10.90    4.40
  -2   3 -12    2.70    2.80
   2  -3  13   -0.30    3.00
  -2   3 -13    3.90    4.20
   2  -3  14    8.40    3.80
  -2   3 -14   -5.20    3.40
  -2   3 -15    9.30    5.60
  -2   3 -16   10.50    4.50
  -2   3 -17    6.10    4.40
  -2   3 -18    4.90    6.10
  -2   3 -19    8.20    4.60
   2  -2 -21   -4.20    7.30
   2  -2 -20   24.00    6.30
   2  -2 -19    7.50    4.70
   2  -2 -18   11.60    6.70
   2  -2 -17   -1.70    3.90
   2  -2 -16    3.10    3.80
   2  -2 -15    1.10    4.90
   2  -2 -14    4.50    3.60
  -2   2  14   15.10    3.50
   2  -2 -13    1.80    4.20
  -2   2  13   -2.30    3.50
   2  -2 -12   -0.90    2.90
  -2   2  12    4.30    2.90
  -2   2  11   -1.90    2.50
   2  -2 -10    2.00    2.50
  -2   2  10    8.10    3.40
   2  -2  -9   -3.70    3.20
  -2   2   9    0.70    2.00
   2  -2  -8  216.60   10.20
  -2   2   8  196.10    7.90
   2  -2  -7  563.00   22.50
  -2   2   7  574.30   21.90
   2  -2  -6  125.70    7.30
  -2   2   6  124.30    5.80
   2  -2  -5 5037.20  270.60
  -2   2   5 5182.70  232.10
   2  -2  -4  624.20   18.20
  -2   2   4  631.50   27.00
  -2   2   3  390.90   17.70
   2  -2  -1   76.00   17.70
  -2   2  -1   16.90    1.70
   2  -2   2    1.50    2.50
  -2   2  -2   -1.50    1.60
   2  -2   3  133.30   17.20
  -2   2  -3  121.30    6.10
   2  -2   4   11.50    1.70
  -2   2  -4   20.00    2.20
   2  -2   5  579.70   23.40
  -2   2  -5  587.40   25.00
   2  -2   6  274.70   12.00
  -2   2  -6  245.20   11.90
   2  -2   7  100.00    5.30
  -2   2  -7   99.70    5.60
   2  -2   8   33.70    3.60
  -2   2  -8   30.30    2.80
   2  -2   9   10.50    2.40
  -2   2  -9    7.60    3.10
   2  -2  10    9.60    3.90
  -2   2 -10   -1.30    1.80
   2  -2  11   33.70    4.60
  -2   2 -11   39.00    4.60
   2  -2  12   -4.10    3.90
  -2   2 -12    4.80    4.10
   2  -2  13   11.60    4.00
  -2   2 -13   29.30    4.10
   2  -2  14   13.50    3.50
  -2   2 -14    1.70    4.20
  -2   2 -15   -5.90    4.80
  -2   2 -16   43.00    5.50
  -2   2 -17   29.60    5.40
  -2   2 -18    9.00    6.50
  -2   2 -19   11.70    5.00
  -2   2 -20   16.50    5.70
   2  -1 -21    6.70    6.70
   2  -1 -20   11.40    6.50
   2  -1 -19    7.00    7.70
   2  -1 -18   -0.40    5.00
   2  -1 -17    1.70    6.30
   2  -1 -16    7.60    4.90
   2  -1 -15    3.00    5.60
   2  -1 -14   32.90    4.70
  -2   1  14   29.10    5.40
   2  -1 -13   40.20    6.10
  -2   1  13   35.50    4.60
   2  -1 -12   47.60    5.20
  -2   1  12   55.70    6.10
   2  -1 -11    4.80    3.80
  -2   1  11   -2.10    3.80
   2  -1 -10   58.10    4.10
  -2   1  10   54.10    6.40
   2  -1  -9  157.20    9.20
  -2   1   9  159.60    8.50
   2  -1  -8   12.70    3.10
  -2   1   8   16.20    2.90
   2  -1  -7   80.50    5.70
  -2   1   7   67.30    4.30
   2  -1  -6  166.80    7.90
  -2   1   6  174.20    8.60
   2  -1  -5  145.10    7.50
  -2   1   5  142.80    6.50
   2  -1  -4 4718.90  239.80
  -2   1   4 4859.80  237.90
   2  -1   0   30.70    3.30
  -2   1   0   32.10    1.30
   2  -1   1    1.30    0.50
  -2   1  -1   26.20    6.50
   2  -1   2    0.50    0.80
   2  -1   3    4.70    1.20
  -2   1  -3    2.50    1.30
   2  -1   4  125.90    5.90
  -2   1  -4  121.20    6.60
   2  -1   5   19.80    2.00
  -2   1  -5   21.00    2.20
   2  -1   6   23.00    2.90
  -2   1  -6   31.90    3.40
   2  -1   7    9.20    1.90
  -2   1  -7    6.70    2.40
   2  -1   8   13.00    2.40
  -2   1  -8   15.50    2.80
   2  -1   9    4.00    2.30
  -2   1  -9    5.70    2.40
   2  -1  10   49.50    4.40
  -2   1 -10   62.70    4.80
   2  -1  11   99.60    8.10
  -2   1 -11  104.70    7.00
   2  -1  12    3.00    2.60
  -2   1 -12    6.10    3.90
   2  -1  13   43.30    5.50
  -2   1 -13   52.30    6.50
   2  -1  14    5.50    3.80
  -2   1 -14    5.30    3.00
   2  -1  15    5.80    3.90
  -2   1 -15    7.10    3.20
  -2   1 -16   13.20    4.30
  -2   1 -17   89.70   10.90
  -2   1 -18   46.90    8.20
  -2   1 -19    2.40    4.80
  -2   1 -20   -6.90    4.10
   2   0 -21   10.40    6.30
   2   0 -20   -5.00    5.00
   2   0 -19   17.80    5.10
   2   0 -18   20.10    8.50
   2   0 -17  106.20   11.30
   2   0 -16   11.90    5.90
   2   0 -15    6.90    3.60
   2   0 -14   41.10    6.90
  -2   0  14   37.70    7.00
   2   0 -13   40.80    6.00
  -2   0  13   32.10    6.00
   2   0 -12   -1.80    2.70
  -2   0  12    2.00    2.70
   2   0 -11    9.00    4.50
  -2   0  11    0.90    2.90
   2   0 -10   99.30    7.30
  -2   0  10   87.50    6.20
   2   0  -9    9.80    3.30
  -2   0   9    7.70    3.30
   2   0  -8  122.60    6.90
  -2   0   8  119.40    7.60
   2   0  -7    1.80    4.10
  -2   0   7    4.20    2.80
   2   0  -6   27.10    3.20
  -2   0   6   37.70    4.50
   2   0  -5   41.80    4.00
  -2   0   5   50.50    3.10
   2   0  -4   -2.10    2.20
  -2   0   4   -5.30    2.60
   2   0  -3  429.10   22.70
   2   0  -1    0.70    0.80
   2   0   0   -0.60    0.40
   2   0   1    0.10    0.50
   2   0   2   16.10   10.70
   2   0   3 2027.60  215.30
   2   0   4   12.40    1.60
  -2   0  -4    8.70    2.40
   2   0   5    8.80    2.30
  -2   0  -5    9.40    1.80
   2   0   6  117.30    6.20
  -2   0  -6  135.80    7.30
   2   0   7   33.60    3.20
  -2   0  -7   31.10    4.00
   2   0   8   33.70    4.00
  -2   0  -8   21.00    2.90
   2   0   9    1.00    2.20
  -2   0  -9    1.70    2.70
   2   0  10   -2.20    2.40
  -2   0 -10   -3.80    2.00
   2   0  11   28.90    3.70
  -2   0 -11   20.70    3.20
   2   0  12   87.40    6.70
  -2   0 -12   94.20    7.00
   2   0  13   -5.80    4.20
  -2   0 -13    1.30    3.50
   2   0  14   10.20    3.50
  -2   0 -14   12.60    4.10
   2   0  15   13.90    5.70
  -2   0 -15   24.30    4.90
  -2   0 -16   73.30    7.30
  -2   0 -17    3.20    5.10
  -2   0 -18    2.00    6.00
  -2   0 -19   55.80    8.90
  -2   0 -20   -0.20    4.60
  -2   0 -21    4.00    5.50
   2   1 -20   -1.00    6.20
   2   1 -19   11.80    8.00
   2   1 -18   11.80    5.30
   2   1 -17    3.30    6.70
   2   1 -16   -1.70    4.10
   2   1 -15   -4.60    3.50
   2   1 -14   -4.90    5.90
   2   1 -13   54.00    5.90
  -2  -1  13   34.40    5.70
   2   1 -12    6.40    3.30
  -2  -1  12   22.20    4.40
   2   1 -11    7.20    3.30
  -2  -1  11    1.60    2.70
   2   1 -10    6.70    4.50
  -2  -1  10    3.90    2.80
   2   1  -9  390.20   20.60
  -2  -1   9  388.50   19.00
   2   1  -8   55.90    5.20
  -2  -1   8   56.00    6.00
   2   1  -7   20.40    3.50
  -2  -1   7   29.10    3.70
   2   1  -6   79.60    6.40
  -2  -1   6   73.10    4.80
   2   1  -5   39.40    3.20
  -2  -1   5   36.20    2.90
   2   1  -4   -0.40    2.50
  -2  -1   4   -0.20    3.30
   2   1  -3   76.00    4.50
  -2  -1   3   87.00    5.90
   2   1   0    0.50    1.00
   2   1   1    1.00    0.70
   2   1   2   -0.90    0.70
   2   1   3   39.30   13.60
   2   1   4  140.60  122.80
  -2  -1  -4   43.70    2.20
   2   1   5    6.40    2.00
  -2  -1  -5    3.00    1.70
  -2  -1  -6    6.50    2.90
   2   1   7  289.70   11.60
  -2  -1  -7  294.50   12.10
   2   1   8    7.70    2.20
  -2  -1  -8    9.80    2.20
   2   1   9   65.40    5.80
  -2  -1  -9   47.10    4.30
   2   1  10  135.60    6.70
  -2  -1 -10  121.50    6.70
   2   1  11   22.90    3.60
  -2  -1 -11   22.50    3.80
   2   1  12   -2.20    2.70
  -2  -1 -12   -2.40    3.60
   2   1  13   81.50    6.50
  -2  -1 -13   86.00    7.50
   2   1  14    2.80    4.00
  -2  -1 -14    5.90    3.10
   2   1  15   66.60    6.90
  -2  -1 -15   63.30    7.10
  -2  -1 -16   10.60    3.90
  -2  -1 -17    8.90    4.70
  -2  -1 -18   40.80    8.10
  -2  -1 -19    3.80    5.90
  -2  -1 -20    7.40    6.60
  -2  -1 -21    8.80    7.50
   2   2 -20   16.60    9.00
   2   2 -19    3.80    5.50
   2   2 -18   54.60   10.00
   2   2 -17   39.60    6.60
   2   2 -16  232.00   20.50
   2   2 -15   -1.70    6.50
   2   2 -14    8.10    4.20
   2   2 -13  310.00   18.80
  -2  -2  13  278.20   19.50
   2   2 -12   39.80    5.90
  -2  -2  12   36.80    5.60
   2   2 -11   18.20    4.10
  -2  -2  11   23.80    3.70
   2   2 -10  170.20    9.60
  -2  -2  10  154.60   10.00
   2   2  -9    4.50    2.70
  -2  -2   9    3.50    3.90
   2   2  -8   67.10    5.30
  -2  -2   8   59.90    5.40
   2   2  -7   -0.50    2.90
  -2  -2   7   -2.30    2.40
   2   2  -6   45.70    5.50
  -2  -2   6   45.80    3.50
   2   2  -5   38.00    4.20
  -2  -2   5   49.60    3.60
   2   2  -4   28.60    3.70
  -2  -2   4   26.50    2.50
   2   2  -3    1.40    2.10
  -2  -2   3   -0.20    1.60
   2   2  -2   70.20    6.30
   2   2   1   -3.00    1.40
   2   2   3  346.60   59.10
   2   2   4  567.60   24.40
  -2  -2  -4  601.40   20.60
   2   2   5  108.80    5.70
  -2  -2  -5   98.00    2.90
   2   2   6   36.60    2.60
  -2  -2  -6   36.00    3.40
   2   2   7    7.10    2.30
  -2  -2  -7    3.10    2.40
   2   2   8  270.30   12.50
  -2  -2  -8  234.90   10.90
   2   2   9   -4.90    2.40
  -2  -2  -9    2.40    2.50
   2   2  10   21.10    3.50
  -2  -2 -10   12.70    3.00
   2   2  11  367.80   15.50
  -2  -2 -11  334.70   17.20
   2   2  12    2.90    4.20
  -2  -2 -12    2.50    2.70
   2   2  13    9.40    4.40
  -2  -2 -13   14.60    4.30
   2   2  14   99.10    9.20
  -2  -2 -14  108.70    8.00
   2   2  15   15.80    3.70
  -2  -2 -15   11.80    4.90
  -2  -2 -16    5.10    3.50
  -2  -2 -17   -0.60    3.90
  -2  -2 -18    1.20    4.30
  -2  -2 -19   78.60    9.70
  -2  -2 -20   19.00    6.70
  -2  -2 -21   14.70    6.10
  -2  -2 -22    9.20    6.50
   2   3 -19   48.60   11.90
   2   3 -18   33.30    7.60
   2   3 -17   41.70    6.70
   2   3 -16    3.40    6.10
   2   3 -15   -3.00    4.30
   2   3 -14   19.00    5.40
   2   3 -13   18.50    4.50
   2   3 -12   48.80    6.00
  -2  -3  12   51.50    6.10
   2   3 -11    2.70    3.70
  -2  -3  11   -2.30    3.50
   2   3 -10   90.40    6.70
  -2  -3  10   77.70    6.90
   2   3  -9   93.60    7.00
  -2  -3   9   94.60    6.40
   2   3  -8   17.10    4.00
  -2  -3   8   20.00    4.40
   2   3  -7   35.90    3.70
  -2  -3   7   40.20    4.90
   2   3  -6    0.20    2.40
  -2  -3   6    8.20   23.40
   2   3  -5   22.00    4.50
  -2  -3   5   20.90    4.00
   2   3  -4   47.20    3.50
  -2  -3   4   51.00    4.40
   2   3  -3  111.80    6.10
  -2  -3   3  100.00    5.60
  -2  -3   2   -1.30    1.70
   2   3  -1  137.50    6.80
  -2  -3   1  147.90    5.40
  -2  -3   0    5.80    2.60
  -2  -3  -1    8.90    3.10
  -2  -3  -3  172.40    8.50
   2   3   4  101.80    7.10
  -2  -3  -4   81.30    5.20
   2   3   5    9.40    2.30
  -2  -3  -5   10.10    2.40
   2   3   6   42.00    3.30
  -2  -3  -6   37.80    1.40
   2   3   7  844.70   39.60
  -2  -3  -7  845.10   25.50
   2   3   8   32.20    4.00
  -2  -3  -8   36.60    4.40
   2   3   9  376.60   17.40
  -2  -3  -9  374.10   15.80
   2   3  10   40.40    5.20
  -2  -3 -10   27.30    3.30
   2   3  11  300.10   13.00
  -2  -3 -11  271.00   16.90
   2   3  12  142.60   10.60
  -2  -3 -12  137.40    9.00
   2   3  13   99.30    7.40
  -2  -3 -13   97.80    8.00
   2   3  14   12.00    3.50
  -2  -3 -14    2.00    3.10
   2   3  15   66.70    6.10
  -2  -3 -15   70.00    7.80
  -2  -3 -16   21.90    5.30
  -2  -3 -17    7.60    4.00
  -2  -3 -18    8.30    4.90
  -2  -3 -19    4.30    4.70
  -2  -3 -20   -4.70    4.50
  -2  -3 -21    6.00    5.70
  -2  -3 -22    1.80    5.40
   2   4 -19   17.30    5.90
   2   4 -18   -1.90    5.50
   2   4 -17   20.50    7.60
   2   4 -16    1.50    4.70
   2   4 -15   11.50    4.50
   2   4 -14    6.60    4.20
   2   4 -13   11.20    5.80
   2   4 -12    4.50    6.20
  -2  -4  12    8.00    5.80
   2   4 -11   48.60    5.80
  -2  -4  11   58.50    7.10
   2   4 -10    3.90    3.40
  -2  -4  10    0.50    3.30
   2   4  -9  134.50    9.00
  -2  -4   9  146.20   10.70
   2   4  -8  165.40   13.60
  -2  -4   8  177.30    8.80
  -2  -4   7   -6.20    3.10
   2   4  -6   36.20    4.60
  -2  -4   6   25.30    4.50
   2   4  -5   16.10    3.20
  -2  -4   5   13.40    3.00
   2   4  -4   26.10    4.70
  -2  -4   4   16.70    2.90
  -2  -4   3   59.10    2.90
  -2  -4   2  379.90   12.30
   2   4  -1   43.70    3.50
  -2  -4   1   38.20    2.50
   2   4   0   10.50    2.30
  -2  -4   0    6.90    3.10
   2   4   1   86.30    4.90
  -2  -4  -1   73.30    4.70
   2   4   2   48.00    3.90
   2   4   3  242.10   12.00
  -2  -4  -3  233.10    9.60
   2   4   4   18.30    2.80
  -2  -4  -4   21.70    1.20
   2   4   5  161.90    7.70
  -2  -4  -5  155.30    8.70
   2   4   6  542.10   20.90
  -2  -4  -6  521.50   19.50
   2   4   7  203.00   10.50
  -2  -4  -7  183.00    5.40
   2   4   8   54.30    5.30
  -2  -4  -8   54.50    2.40
   2   4   9  119.00    6.70
  -2  -4  -9  113.60    3.90
   2   4  10  374.70   17.70
  -2  -4 -10  354.30   16.50
   2   4  11  141.50    8.00
  -2  -4 -11  127.70    7.70
   2   4  12    0.50    4.00
  -2  -4 -12    4.50    3.10
   2   4  13   -0.30    2.70
  -2  -4 -13    5.60    3.50
   2   4  14   15.60    3.90
  -2  -4 -14   19.30    3.60
   2   4  15  182.70   17.80
  -2  -4 -15  186.50   12.70
  -2  -4 -16   42.90    6.60
  -2  -4 -17    8.00    4.10
  -2  -4 -18   11.20    6.40
  -2  -4 -19   58.10    8.40
  -2  -4 -20    9.30    5.50
  -2  -4 -21    1.10    5.60
  -2  -4 -22   -1.30    5.50
   2   5 -18   -5.80    5.00
   2   5 -17    5.70    5.20
   2   5 -16   -1.80    4.60
   2   5 -15   13.70    5.70
   2   5 -14   11.70    5.60
   2   5 -13    7.80    5.90
   2   5 -12   79.90    9.70
   2   5 -11   73.90    7.90
  -2  -5  11   66.00    7.60
   2   5 -10   12.90    3.60
  -2  -5  10    7.30    3.80
   2   5  -9  108.50    8.20
  -2  -5   9   98.00    7.30
   2   5  -8  216.10   11.90
  -2  -5   8  232.30   15.00
   2   5  -7   23.10    4.30
  -2  -5   7   41.70    6.00
   2   5  -6   25.10    3.80
  -2  -5   6   26.20    4.30
   2   5  -5    1.10    2.80
  -2  -5   5    1.20    2.60
  -2  -5   4  189.90    6.80
  -2  -5   3 1754.30   53.30
  -2  -5   2  165.70    5.90
   2   5  -1  129.90    7.00
  -2  -5   1  133.60    4.80
   2   5   0   22.40    2.80
  -2  -5   0   31.90    5.30
   2   5   1    6.50    2.90
  -2  -5  -1   -2.10    2.20
   2   5   2   83.40    5.70
  -2  -5  -2   77.70    5.40
   2   5   3  101.60    5.60
  -2  -5  -3   84.40    6.60
   2   5   4  338.90   16.60
  -2  -5  -4  326.30   13.40
   2   5   5  548.80   20.80
  -2  -5  -5  520.00   17.80
   2   5   6  138.90    4.60
  -2  -5  -6  126.70    8.70
   2   5   7   81.80    3.60
  -2  -5  -7   88.50    5.20
   2   5   8    7.00    6.70
  -2  -5  -8   22.00    7.50
   2   5   9    1.30    3.50
  -2  -5  -9    1.30    1.10
   2   5  10   57.20    4.70
  -2  -5 -10   55.70    2.40
   2   5  11  207.00   12.80
  -2  -5 -11  210.90    7.60
   2   5  12    7.50    3.10
  -2  -5 -12    2.20    1.20
   2   5  13   16.30    3.70
  -2  -5 -13    9.50    3.30
   2   5  14    3.10    3.10
  -2  -5 -14    3.30    3.10
   2   5  15    5.30    3.90
  -2  -5 -15   -0.20    3.60
  -2  -5 -16   24.40    4.70
  -2  -5 -17    2.80    5.10
  -2  -5 -18   25.10    5.50
  -2  -5 -19   11.50    4.60
  -2  -5 -20   15.20    6.30
  -2  -5 -21    2.40    5.10
  -2  -5 -22    0.40    7.80
   2   6 -17    3.20    8.10
   2   6 -16   33.50    7.50
   2   6 -15   -3.90    4.40
   2   6 -14   36.40    5.70
   2   6 -13    1.90    3.80
   2   6 -12   35.90    5.10
   2   6 -11   23.80    5.80
  -2  -6  11   15.40    5.30
   2   6 -10   87.10    6.90
  -2  -6  10   63.90    7.00
   2   6  -9   26.10    4.30
  -2  -6   9   42.70    6.10
   2   6  -8   51.60    5.30
  -2  -6   8   51.20    5.30
   2   6  -7   63.00    5.30
  -2  -6   7   54.50    4.60
   2   6  -6   -3.00    2.50
  -2  -6   6    1.50    2.30
  -2  -6   5   23.00    2.60
  -2  -6   4    4.90    2.00
  -2  -6   3   -0.70    1.90
  -2  -6   2 3181.70   89.50
   2   6  -1  150.90    6.90
  -2  -6   1  132.50    4.60
   2   6   0  221.20    9.50
  -2  -6   0  217.10    9.90
   2   6   1   44.40    4.40
  -2  -6  -1   36.70    3.40
   2   6   2   10.00    2.60
  -2  -6  -2    6.60    2.40
   2   6   3   85.10    4.30
  -2  -6  -3   85.70    5.30
   2   6   4  128.90    6.90
  -2  -6  -4  156.70    8.30
   2   6   5    6.70    2.50
  -2  -6  -5    6.20    1.40
   2   6   6  189.90    9.60
  -2  -6  -6  196.30   10.70
   2   6   7   58.80    4.50
  -2  -6  -7   63.80    6.10
   2   6   8   13.00    1.20
  -2  -6  -8   10.70    2.90
   2   6   9    2.10    0.90
  -2  -6  -9    1.00    4.10
   2   6  10   82.60    7.10
  -2  -6 -10   82.30    6.10
   2   6  11  425.40   21.70
  -2  -6 -11  445.30   20.30
   2   6  12  125.10    8.20
  -2  -6 -12  125.40    4.40
   2   6  13   20.70    4.70
  -2  -6 -13   17.30    1.30
   2   6  14  472.00   27.80
  -2  -6 -14  471.10   16.40
   2   6  15   58.60    7.10
  -2  -6 -15   72.00    3.50
  -2  -6 -16   13.00    1.50
  -2  -6 -17    5.00    1.40
  -2  -6 -18    5.50    1.50
  -2  -6 -19    3.90    1.70
  -2  -6 -20   24.30    6.50
  -2  -6 -21   -3.70    5.30
  -2  -6 -22   14.80    6.50
  -2  -6 -23   -2.60    6.60
   2   7 -16   -2.50    5.40
   2   7 -15    4.00    4.70
   2   7 -14    5.60    4.20
   2   7 -13    7.10    4.20
   2   7 -12   -0.50    4.00
   2   7 -11  243.10   14.60
   2   7 -10   86.80    7.30
  -2  -7  10   90.60    8.70
   2   7  -9   22.50    4.20
  -2  -7   9   12.40    4.00
   2   7  -8   14.70    3.70
  -2  -7   8   28.30    3.30
  -2  -7   7   15.40    3.50
  -2  -7   6    7.20    3.00
  -2  -7   5    1.20    1.80
  -2  -7   4   -1.90    2.50
  -2  -7   3  264.50    9.00
  -2  -7   2   20.70    2.70
   2   7  -1  333.90   12.90
  -2  -7   1  355.30   10.30
   2   7   0   92.60    5.90
  -2  -7   0   99.90    5.40
   2   7   1  245.60   11.30
  -2  -7  -1  246.50   14.70
   2   7   2  192.00    8.80
  -2  -7  -2  175.50    8.30
   2   7   3   80.50    4.90
  -2  -7  -3   67.80    4.80
   2   7   4    1.70    2.40
  -2  -7  -4   16.20    4.10
   2   7   5   43.60    4.60
  -2  -7  -5   44.00    2.40
   2   7   6   35.10    4.50
  -2  -7  -6   33.40    1.90
   2   7   7   14.10    2.90
  -2  -7  -7   18.20    2.90
   2   7   8    4.80    3.50
  -2  -7  -8    6.90    2.90
   2   7   9  113.70    4.80
  -2  -7  -9  118.60    7.80
   2   7  10  108.30    4.20
  -2  -7 -10  113.50    7.30
   2   7  11   14.50    1.60
  -2  -7 -11   15.60    4.10
   2   7  12    0.10    3.00
  -2  -7 -12    0.60    2.50
   2   7  13   -3.30    4.50
  -2  -7 -13   -1.10    3.10
   2   7  14    3.80    3.70
  -2  -7 -14    9.60    3.50
   2   7  15   79.90    7.70
  -2  -7 -15  110.70    9.30
  -2  -7 -16    0.50    0.60
  -2  -7 -17    4.30    0.90
  -2  -7 -18    1.60    0.90
  -2  -7 -19    5.00    1.10
  -2  -7 -20    0.50    4.50
  -2  -7 -21    3.90    7.90
  -2  -7 -22   12.40    5.60
  -2  -7 -23   37.10    9.90
   2   8 -16    5.10    5.40
  -2  -8  16   15.20    5.50
   2   8 -15    3.20    6.90
   2   8 -14   -1.90    6.80
   2   8 -13    2.40    4.30
  -2  -8  13    2.90    4.00
   2   8 -12    5.00    4.70
  -2  -8  12   12.90    4.60
   2   8 -11   -3.30    3.70
  -2  -8  11   -1.50    3.70
  -2  -8  10   31.00    6.40
  -2  -8   9    3.10    2.40
  -2  -8   8   35.40    3.90
  -2  -8   7   19.00    3.10
  -2  -8   6    1.80    2.50
  -2  -8   5   29.10    3.20
  -2  -8   4   41.80    3.70
  -2  -8   3    2.60    2.00
  -2  -8   2   28.50    2.60
  -2  -8   1   39.60    3.10
   2   8   0  101.80    7.20
  -2  -8   0   92.90    5.40
   2   8   1  392.60   16.60
  -2  -8  -1  406.40   15.80
   2   8   2    4.90    2.90
  -2  -8  -2    2.90    2.80
   2   8   3  793.80   31.80
  -2  -8  -3  756.20   42.10
   2   8   4   63.50    4.60
  -2  -8  -4   76.30    5.20
   2   8   5  212.20    9.90
  -2  -8  -5  201.30    6.70
   2   8   6   85.00    5.10
  -2  -8  -6   99.90    3.90
   2   8   7   -2.80    2.20
  -2  -8  -7    2.30    3.70
   2   8   8    8.70    3.50
  -2  -8  -8    8.50    3.90
   2   8   9    6.50    3.30
  -2  -8  -9    5.20    3.10
   2   8  10    5.60    1.10
  -2  -8 -10    9.30    3.20
   2   8  11   11.10    1.40
  -2  -8 -11   13.60    4.60
   2   8  12    0.90    0.90
  -2  -8 -12   -1.40    4.60
   2   8  13   24.50    2.20
  -2  -8 -13   26.20    5.40
   2   8  14   98.90   10.50
  -2  -8 -14   99.30    9.50
   2   8  15   -1.20    3.20
  -2  -8 -15    1.20    3.50
  -2  -8 -16   17.70    6.40
  -2  -8 -17   22.50    4.70
  -2  -8 -18   21.30    6.90
  -2  -8 -19    7.10    3.90
  -2  -8 -20   26.60    5.90
  -2  -8 -21    1.10    4.10
  -2  -8 -22   -7.80    7.70
  -2  -8 -23   -1.00    8.20
  -2  -9  15   -2.00    7.40
  -2  -9  14   -0.70    6.50
  -2  -9  13   -3.00    6.70
  -2  -9  12    5.30    6.60
  -2  -9  11   24.40    4.70
  -2  -9  10    9.90    3.70
  -2  -9   9   15.30    4.50
  -2  -9   8   11.70    3.30
  -2  -9   7    3.20    2.40
  -2  -9   6   21.30    2.90
  -2  -9   5   36.20    3.60
  -2  -9   4   16.30    2.40
  -2  -9   3   22.70    2.70
  -2  -9   2    5.70    2.40
  -2  -9   1   18.50    2.70
   2   9   0   95.00    5.80
  -2  -9   0   87.70    6.00
   2   9   1   54.80    5.40
  -2  -9  -1   53.80    5.10
   2   9   2   64.90    5.90
  -2  -9  -2   73.90    5.60
   2   9   3   76.60    5.70
  -2  -9  -3   78.10    6.80
   2   9   4   98.80    5.50
  -2  -9  -4  114.40    6.60
   2   9   5  354.60   14.40
  -2  -9  -5  383.40   13.90
   2   9   6   13.30    2.90
  -2  -9  -6   12.50    2.10
   2   9   7  518.40   16.40
  -2  -9  -7  506.60   17.30
   2   9   8   83.70    6.30
  -2  -9  -8   89.70    6.20
   2   9   9   -4.00    2.50
  -2  -9  -9    1.00    4.10
   2   9  10    9.20    3.50
  -2  -9 -10   -0.30    3.00
   2   9  11    5.20    1.50
  -2  -9 -11    6.00    2.90
   2   9  12    2.20    1.50
  -2  -9 -12   -0.50    2.60
   2   9  13   16.60    1.80
  -2  -9 -13   12.00    4.10
   2   9  14    2.30    1.30
  -2  -9 -14    2.10    4.20
   2   9  15   33.60    2.70
  -2  -9 -15   28.60    5.70
   2   9  16   13.70    2.20
  -2  -9 -16   10.80    3.70
  -2  -9 -17    5.10    4.40
  -2  -9 -18    0.70    0.70
  -2  -9 -19   12.70    6.80
  -2  -9 -20    1.60    5.00
  -2  -9 -21   24.20    7.30
  -2  -9 -22   -1.30    5.30
  -2  -9 -23   -5.50    8.60
  -2 -10  14   -7.20    5.80
  -2 -10  13    0.10    4.40
  -2 -10  12    4.40    4.20
  -2 -10  11   10.80    6.30
  -2 -10  10   -1.40    4.00
  -2 -10   9    6.40    5.00
  -2 -10   8    2.00    3.00
  -2 -10   7   35.50    3.50
  -2 -10   6    0.20    2.10
  -2 -10   5   65.60    4.20
  -2 -10   4   71.60    4.80
  -2 -10   3   93.70    4.40
  -2 -10   2  314.60   11.10
  -2 -10   1   10.60    2.40
   2  10   0    7.40    3.20
  -2 -10   0    8.60    3.30
   2  10   1  128.70    8.10
  -2 -10  -1  145.90    8.90
   2  10   2    2.00    2.60
  -2 -10  -2   -0.80    2.70
   2  10   3    6.10    2.80
  -2 -10  -3    1.10    3.70
   2  10   4   69.60    5.20
  -2 -10  -4   67.40    5.40
   2  10   5    2.70    2.40
  -2 -10  -5   -1.60    1.50
   2  10   6  390.20   19.60
  -2 -10  -6  374.90   11.80
   2  10   7   -1.00    1.20
  -2 -10  -7    0.30    1.50
   2  10   8   11.60    1.30
  -2 -10  -8   21.20    3.50
   2  10   9   24.50    4.10
  -2 -10  -9   32.40    6.10
   2  10  10    2.50    2.80
  -2 -10 -10    6.10    3.10
   2  10  11    8.30    3.20
  -2 -10 -11    2.90    3.20
   2  10  12   69.30    6.20
  -2 -10 -12   95.00    6.80
   2  10  13    0.30    1.30
  -2 -10 -13    6.20    3.50
   2  10  14    2.20    1.40
  -2 -10 -14    2.60    4.80
   2  10  15    8.20    1.50
  -2 -10 -15    9.10    5.30
   2  10  16   10.80    1.60
  -2 -10 -16    7.40    4.10
   2  10  17   -0.50    1.70
  -2 -10 -17   -7.40    6.00
   2  10  18    1.50    1.40
  -2 -10 -18   -0.40    3.90
  -2 -10 -19    2.80    4.50
  -2 -10 -20   19.20    5.60
  -2 -10 -21   -4.80    5.30
  -2 -10 -22    4.60    5.90
  -2 -10 -23   14.70   10.20
  -2 -11  13   -0.80    5.20
  -2 -11  12   14.60    5.40
  -2 -11  11   -1.80    4.90
  -2 -11  10    7.80    6.60
  -2 -11   9    5.70    4.00
  -2 -11   8   38.90    5.60
  -2 -11   7   13.30    4.50
  -2 -11   6    8.90    3.20
  -2 -11   5   44.90    4.30
  -2 -11   4   95.50    5.10
  -2 -11   3   87.90    5.00
  -2 -11   2   42.30    3.50
  -2 -11   1  205.30    7.70
   2  11   0   37.40    4.10
  -2 -11   0   44.50    3.20
   2  11   1    9.20    2.50
  -2 -11  -1   11.40    2.90
   2  11   2   42.40    4.20
  -2 -11  -2   34.80    5.00
   2  11   3    9.20    3.90
  -2 -11  -3    2.50    2.80
   2  11   4   -2.90    3.90
  -2 -11  -4   -0.60    2.90
   2  11   5   42.30    5.30
  -2 -11  -5   41.20    2.80
   2  11   6   15.50    3.90
  -2 -11  -6   13.00    2.60
   2  11   7    5.10    1.30
  -2 -11  -7    2.50    1.60
   2  11   8   15.80    1.80
  -2 -11  -8   19.70    2.10
   2  11   9   19.00    3.80
  -2 -11  -9   25.80    5.30
   2  11  10  150.80    9.90
  -2 -11 -10  141.50    8.60
   2  11  11  113.00    8.20
  -2 -11 -11  103.60    7.60
   2  11  12    1.00    3.20
  -2 -11 -12   10.30    4.10
   2  11  13    4.70    3.90
  -2 -11 -13    5.60    3.90
   2  11  14   -0.30    3.50
  -2 -11 -14   -3.00    4.30
   2  11  15    2.70    1.50
  -2 -11 -15    6.70    4.70
   2  11  16    2.90    2.00
  -2 -11 -16    3.40    3.90
   2  11  17    7.00    2.00
  -2 -11 -17    7.30    6.20
   2  11  18    0.90    1.90
  -2 -11 -18   12.60    5.20
  -2 -11 -19   -3.20    3.80
  -2 -11 -20   -4.40    7.10
  -2 -11 -21   28.30    7.50
  -2 -11 -22    0.10    5.40
  -2 -12  12   -6.90    6.80
  -2 -12  11   -5.60    4.90
  -2 -12  10    2.30    5.90
  -2 -12   9    2.00    4.20
  -2 -12   8    4.10    5.00
  -2 -12   7    7.10    4.20
  -2 -12   6    6.30    3.40
  -2 -12   5   20.50    3.70
  -2 -12   4    1.30    2.70
  -2 -12   3   18.70    3.30
  -2 -12   2    3.40    2.50
  -2 -12   1   11.40    2.60
  -2 -12   0   16.70    3.00
   2  12   1  119.40    8.80
  -2 -12  -1  132.80    9.30
   2  12   2   15.10    4.50
  -2 -12  -2   17.10    3.60
   2  12   3   43.90    5.00
  -2 -12  -3   28.60    3.50
   2  12   4   68.70    6.00
  -2 -12  -4   67.00    3.70
   2  12   5    6.00    4.50
  -2 -12  -5    5.40    2.30
   2  12   6  114.30    6.40
  -2 -12  -6  116.10    4.80
   2  12   7   43.70    5.30
  -2 -12  -7   42.70    3.10
   2  12   8   32.10    2.50
  -2 -12  -8   38.80    3.00
   2  12   9    2.10    1.30
  -2 -12  -9   12.40    4.30
   2  12  10   68.80    6.90
  -2 -12 -10   62.20    6.20
   2  12  11   10.20    5.40
  -2 -12 -11   10.70    4.10
   2  12  12   23.90    5.10
  -2 -12 -12   27.80    5.00
   2  12  13   21.90    5.10
  -2 -12 -13   34.90    5.00
  -2 -12 -14    5.90    5.50
  -2 -12 -15    4.60    4.60
  -2 -12 -16   -2.50    4.10
   2  12  17    3.90    2.40
  -2 -12 -17    1.20    6.30
  -2 -12 -18    9.50    5.80
  -2 -12 -19    5.00    4.40
  -2 -12 -20    7.00    5.20
  -2 -12 -21   14.80    5.70
  -2 -12 -22   11.70    6.70
  -2 -13  11    9.10    6.70
  -2 -13  10    4.80    3.60
  -2 -13   9    7.60    6.80
  -2 -13   8    7.40    4.20
  -2 -13   7   -1.60    3.20
  -2 -13   6    6.30    5.50
  -2 -13   5   -2.10    4.50
  -2 -13   4    4.70    5.20
  -2 -13   3    6.30    3.20
  -2 -13   2   -1.50    3.10
  -2 -13   1  189.50    8.10
  -2 -13   0   52.80    4.20
   2  13   1  106.70    9.30
  -2 -13  -1  131.30   10.20
   2  13   2  435.30   30.90
  -2 -13  -2  479.10   22.60
   2  13   3   82.30    7.10
  -2 -13  -3   98.10    7.10
   2  13   4   24.50    5.50
  -2 -13  -4   15.70    2.70
   2  13   5  162.80    9.40
  -2 -13  -5  165.90    6.50
   2  13   6   31.30    6.00
  -2 -13  -6   28.50    2.60
   2  13   7   -2.80    4.40
  -2 -13  -7   -0.70    1.90
   2  13   8   13.10    1.80
  -2 -13  -8   14.60    2.10
   2  13   9    2.30    1.50
  -2 -13  -9    2.80    5.50
   2  13  10   12.70    4.00
  -2 -13 -10   17.40    5.10
   2  13  11   43.50    6.00
  -2 -13 -11   45.60    7.00
   2  13  12   18.20    4.40
  -2 -13 -12   22.90    5.50
  -2 -13 -13   44.70    4.80
  -2 -13 -14   -2.40    3.70
  -2 -13 -15   37.40    6.90
  -2 -13 -16    5.60    4.90
  -2 -13 -17    3.50    6.00
  -2 -13 -18    1.70    4.90
  -2 -13 -19   -8.00    6.00
  -2 -13 -20    6.90    5.20
  -2 -13 -21   -0.80    4.30
  -2 -13 -22   24.20    9.00
  -2 -14   9    1.00    3.90
  -2 -14   8    6.90    5.90
  -2 -14   7   57.40    9.20
  -2 -14   6   -0.10    3.70
  -2 -14   5   -5.40    3.50
  -2 -14   4    4.20    3.60
  -2 -14   3   -9.50    4.40
  -2 -14   2   14.50    3.50
  -2 -14   1   13.40    2.80
  -2 -14   0    1.40    3.60
   2  14   1    0.20    3.70
  -2 -14  -1    1.60    2.80
   2  14   2  139.40   10.30
  -2 -14  -2  143.70    9.20
   2  14   3  242.00   17.30
  -2 -14  -3  247.10    9.20
   2  14   4  109.40    7.50
  -2 -14  -4  114.60    5.50
   2  14   5   62.90    6.80
  -2 -14  -5   60.10    4.40
   2  14   6    1.50    3.50
  -2 -14  -6   -1.10    2.40
   2  14   7    7.30    2.00
  -2 -14  -7   11.80    2.40
   2  14   8    4.10    2.00
  -2 -14  -8   -0.10    2.50
   2  14   9  111.70    5.60
  -2 -14  -9  104.80    8.80
   2  14  10    6.70    1.60
  -2 -14 -10    2.20    3.50
   2  14  11    5.60    5.80
  -2 -14 -11   20.80    5.80
   2  14  12    1.40    0.60
  -2 -14 -12    3.00    5.40
  -2 -14 -13    2.20    5.10
  -2 -14 -14    5.20    4.30
  -2 -14 -15    0.50    4.30
  -2 -14 -16    1.20    3.90
  -2 -14 -17    2.10    5.60
  -2 -14 -18   -1.60    4.50
  -2 -14 -19    9.90    7.30
  -2 -14 -20   14.50    5.70
  -2 -14 -21    3.70    5.90
  -2 -14 -22    1.20    8.50
  -2 -15   8   -2.20    3.50
  -2 -15   7    1.70    4.70
  -2 -15   6   19.40    6.60
  -2 -15   5   13.00    6.00
  -2 -15   4   -3.40    4.80
  -2 -15   3   -6.00    5.10
  -2 -15   2    1.40    3.80
  -2 -15   1    3.30    3.70
  -2 -15   0    7.60    5.50
  -2 -15  -1    3.80    2.70
   2  15   2    4.40    3.60
  -2 -15  -2   10.90    3.50
   2  15   3   46.70    7.30
  -2 -15  -3   49.50    4.70
   2  15   4   -7.70    5.10
  -2 -15  -4   -1.20    2.40
   2  15   5   51.30    6.60
  -2 -15  -5   45.50    3.70
   2  15   6   35.80    5.50
  -2 -15  -6   32.90    3.80
   2  15   7   36.10    3.00
  -2 -15  -7   41.40    3.80
   2  15   8   78.90    4.80
  -2 -15  -8   80.70    5.60
   2  15   9    3.80    1.50
  -2 -15  -9    6.80    2.30
   2  15  10   42.70    3.10
  -2 -15 -10   43.80    6.20
  -2 -15 -11   89.50    8.60
   2  15  12    8.10    1.40
  -2 -15 -12    3.30    3.90
  -2 -15 -13    1.60    4.20
  -2 -15 -14    6.90    6.10
  -2 -15 -15    7.90    4.50
  -2 -15 -16   -0.80    3.70
  -2 -15 -17   21.50    6.10
  -2 -15 -18    4.60    7.40
  -2 -15 -19    7.80    5.40
  -2 -15 -20    5.00    6.60
  -2 -15 -21   -6.40    5.70
  -2 -16   6   -0.80    3.70
  -2 -16   5   -2.10    4.40
  -2 -16   4    1.90    3.50
  -2 -16   3    3.40    4.60
  -2 -16   2   15.20    4.50
  -2 -16   1    1.80    4.60
  -2 -16   0    7.90    5.00
  -2 -16  -1    4.80    4.30
  -2 -16  -2    7.10    3.60
   2  16   3    9.60    4.00
  -2 -16  -3    4.60    3.20
   2  16   4   69.80    7.20
  -2 -16  -4   66.80    4.80
   2  16   5   -0.30    5.00
  -2 -16  -5    8.70    3.50
   2  16   6   97.20    8.40
  -2 -16  -6  105.80    5.70
   2  16   7  170.40   12.60
  -2 -16  -7  177.80    8.20
   2  16   8   10.10    3.30
  -2 -16  -8   11.30    2.70
   2  16   9   24.70    3.50
  -2 -16  -9   31.10    3.50
   2  16  10    1.40    1.60
  -2 -16 -10   -0.90    5.60
  -2 -16 -11   81.90    6.90
  -2 -16 -12   33.10    5.80
  -2 -16 -13    0.40    6.20
  -2 -16 -14   18.50    6.00
  -2 -16 -15   86.60    9.70
  -2 -16 -16   -6.20    4.40
  -2 -16 -17   34.40    8.40
  -2 -16 -18   -3.00    4.90
  -2 -16 -19   17.80    8.80
  -2 -16 -20   14.00    6.60
  -2 -17   5   13.40    6.90
  -2 -17   4    9.00    5.00
  -2 -17   3  115.70   15.30
  -2 -17   2   -0.70    3.90
  -2 -17   1    3.10    5.50
  -2 -17   0   -3.70    5.00
  -2 -17  -1   -1.00    2.40
  -2 -17  -2    3.10    3.20
  -2 -17  -3   19.20    3.30
  -2 -17  -4    2.80    3.60
  -2 -17  -5   -0.20    2.30
  -2 -17  -6   81.20    5.50
   2  17   7    3.30    3.10
  -2 -17  -7   10.40    3.30
   2  17   8   79.10    6.70
  -2 -17  -8   79.10    4.70
   2  17   9    0.90    3.20
  -2 -17  -9    3.50    2.60
   2  17  10   14.00    3.60
  -2 -17 -10   12.10    6.40
  -2 -17 -11   20.00    5.90
  -2 -17 -12   66.70    8.60
  -2 -17 -13   44.50    6.40
  -2 -17 -14    2.50    4.30
  -2 -17 -15   15.80    6.00
  -2 -17 -16   55.00    8.10
  -2 -17 -17   -0.10    6.00
  -2 -17 -18   14.40    8.20
  -2 -17 -19    6.90    6.80
  -2 -17 -20   13.60    6.50
  -2 -18   3   14.40    7.10
  -2 -18   2    9.30    5.60
  -2 -18   1   31.10    5.00
  -2 -18   0    9.10    4.10
  -2 -18  -1   -0.70    3.20
  -2 -18  -2   21.10    4.40
  -2 -18  -3   -4.00    2.70
  -2 -18  -4    1.40    2.90
  -2 -18  -5   -5.20    3.40
   2  18   6   -4.00    3.30
  -2 -18  -6   -0.30    2.80
   2  18   7    8.10    3.30
  -2 -18  -7   14.90    3.50
   2  18   8   -2.30    2.40
  -2 -18  -8    1.00    4.00
  -2 -18  -9   -0.70    3.30
  -2 -18 -10    1.90    6.80
  -2 -18 -11    0.40    4.30
  -2 -18 -12   21.10    9.00
  -2 -18 -13   43.90    6.40
  -2 -18 -14   14.40    7.70
  -2 -18 -15   17.80    5.80
  -2 -18 -16   45.30    9.70
  -2 -18 -17   -6.90    6.00
  -2 -18 -18    7.00    6.10
  -2 -18 -19   23.60    9.50
  -2 -19   1   15.40    4.60
  -2 -19   0    4.30    3.50
  -2 -19  -1    9.30    3.60
  -2 -19  -2   -1.10    3.00
  -2 -19  -3    3.60    3.40
  -2 -19  -4   -6.50    2.80
  -2 -19  -5    1.30    2.70
  -2 -19  -6   17.40    4.20
  -2 -19  -7    1.10    2.70
  -2 -19  -8    9.80    3.50
  -2 -19  -9    5.70    3.40
  -2 -19 -10   17.00    7.30
  -2 -19 -11    4.30    4.70
  -2 -19 -12    7.90    7.20
  -2 -19 -13   10.40    4.60
  -2 -19 -14   -2.10    7.90
  -2 -19 -15   53.70    8.40
  -2 -19 -16   12.60    6.50
  -2 -19 -17    1.60    9.10
  -2 -20  -2   10.30    4.10
  -2 -20  -3   21.50    4.80
  -2 -20  -4   17.60    4.30
  -2 -20  -5    5.20    3.70
  -2 -20  -6    2.50    4.10
  -2 -20  -7    7.50    4.30
  -2 -20  -8   -0.50    3.00
  -2 -20  -9   -5.50    3.00
  -2 -20 -10    8.20    5.00
  -2 -20 -11    5.60    4.70
  -2 -20 -12    3.40    7.90
  -2 -20 -13   -9.10    4.90
  -2 -20 -14    4.60    8.90
  -2 -20 -15   18.00    7.00
  -2 -21  -7   12.40    6.30
  -2 -21  -8    9.60    4.80
  -2 -21  -9   -1.30    3.30
  -2 -21 -10    5.40    5.10
  -2 -21 -11    5.50    7.70
  -3  20   9    7.80    5.00
  -3  20   8   -4.10    5.80
  -3  20   7   25.40    5.60
  -3  20   6    1.30    5.00
   3 -19 -15    4.50    4.30
   3 -19 -14    4.50    5.40
   3 -19 -13   11.40    5.80
   3 -19 -12   18.90    6.10
   3 -19 -11    7.90    5.30
   3 -19 -10   17.10    5.90
  -3  19  10    9.30    4.90
   3 -19  -9   -0.10    3.20
  -3  19   9    9.50    6.10
  -3  19   8   39.80    7.40
  -3  19   7    6.30    5.00
  -3  19   6   37.10    6.20
   3 -19  -4   16.70    6.40
   3 -19  -3    2.10    5.70
   3 -19  -2    7.80    5.80
   3 -18 -17   13.90    5.80
   3 -18 -16    0.10    3.50
   3 -18 -15    7.40    4.10
   3 -18 -14   -0.20    3.50
   3 -18 -13   -1.60    3.60
   3 -18 -12   12.80    5.40
  -3  18  12   -0.20    3.20
   3 -18 -11   13.90    5.20
  -3  18  11   12.20    3.70
   3 -18 -10   11.00    4.50
  -3  18  10   21.30    5.10
   3 -18  -9    3.00    3.50
  -3  18   9   17.00    6.40
   3 -18  -8    2.80    4.30
  -3  18   8    3.10    6.20
   3 -18  -7    4.90    4.20
  -3  18   7    7.70    4.90
   3 -18  -6    4.40    3.70
   3 -18  -5    2.60    2.70
   3 -18  -4   -2.30    4.70
   3 -18  -3    9.80    5.60
   3 -18  -2   36.30    6.50
   3 -18  -1   13.20    7.00
   3 -18   0    0.80    6.80
   3 -18   1   -3.10    5.30
   3 -17 -18    1.00    6.10
   3 -17 -17    7.50    7.00
   3 -17 -16   11.70    5.80
   3 -17 -15    3.90    6.00
   3 -17 -14   36.50    5.80
   3 -17 -13   11.90    3.90
   3 -17 -12    8.90    3.40
  -3  17  12    2.40    2.80
   3 -17 -11    3.40    4.80
  -3  17  11   10.00    3.40
   3 -17 -10   -6.10    4.10
  -3  17  10   -0.60    2.90
   3 -17  -9    6.00    2.50
  -3  17   9    7.40    3.90
   3 -17  -8   33.10    5.00
  -3  17   8   35.20    5.40
   3 -17  -7   52.60    5.30
  -3  17   7   62.40    6.60
   3 -17  -6    5.60    3.70
   3 -17  -5    7.90    3.40
   3 -17  -4   -0.30    1.70
   3 -17  -3    2.10    1.90
   3 -17  -2    5.70    7.10
   3 -17  -1   -6.20    7.00
   3 -17   0    6.90    8.10
   3 -17   1    2.10    5.50
   3 -17   2    5.30    6.10
   3 -17   3   11.50    8.50
   3 -16 -19    2.90    4.40
   3 -16 -18   -2.90    4.50
   3 -16 -17    2.00    4.00
   3 -16 -16   10.00    4.80
   3 -16 -15    7.70    4.20
   3 -16 -14    0.50    3.30
   3 -16 -13   15.10    4.50
  -3  16  13   12.00    2.40
   3 -16 -12    5.40    4.50
  -3  16  12    1.30    2.10
   3 -16 -11   16.80    3.50
  -3  16  11   17.50    2.50
   3 -16 -10    5.70    4.60
  -3  16  10   10.90    2.70
   3 -16  -9   -1.10    3.50
  -3  16   9    2.00    3.00
   3 -16  -8    1.40    2.20
  -3  16   8    1.70    2.20
   3 -16  -7   -0.80    3.00
  -3  16   7    2.20    2.30
   3 -16  -6    0.80    2.90
  -3  16   6    1.30    2.40
   3 -16  -5    9.40    3.50
  -3  16   5   13.30    3.30
   3 -16  -4    4.20    1.70
  -3  16   4   -1.10    2.10
   3 -16  -3    4.10    1.90
   3 -16  -2  109.80    5.40
   3 -16  -1   15.20    2.90
   3 -16   0    1.00    1.80
   3 -16   1   64.80    4.70
   3 -16   2   19.60    8.10
   3 -16   3    0.80    4.30
   3 -16   4   32.50    9.00
   3 -16   5    0.50    5.50
   3 -15 -20    2.40    6.90
   3 -15 -19    6.40    7.80
   3 -15 -18    8.20    6.30
   3 -15 -17    3.10    5.60
   3 -15 -16    2.50    6.10
   3 -15 -15   10.50    5.50
   3 -15 -14    2.50    3.10
   3 -15 -13    4.50    3.90
  -3  15  13    3.50    1.90
   3 -15 -12   32.10    5.00
  -3  15  12   28.50    3.20
   3 -15 -11    0.00    3.40
  -3  15  11    0.40    2.20
   3 -15 -10    6.10    3.20
  -3  15  10    3.10    2.40
   3 -15  -9  187.50   16.20
  -3  15   9  203.90    8.90
   3 -15  -8   73.70    7.50
  -3  15   8   66.80    4.40
   3 -15  -7   29.60    4.20
  -3  15   7   28.50    2.60
   3 -15  -6    1.70    3.00
  -3  15   6    5.80    2.00
   3 -15  -5   13.70    3.10
  -3  15   5   16.40    2.30
   3 -15  -4    0.60    2.20
  -3  15   4    1.10    2.00
   3 -15  -3    6.80    1.80
   3 -15  -2   22.30    1.90
   3 -15  -1   87.00    3.60
   3 -15   0    5.80    1.50
   3 -15   1    8.60    2.40
   3 -15   2    2.50    2.60
   3 -15   3    2.90    2.40
   3 -15   4    8.10    5.10
   3 -15   5   13.90    5.50
   3 -15   6   30.00    6.30
   3 -15   7    8.40    8.30
   3 -14 -20    3.60    5.30
   3 -14 -19   -0.80    4.50
   3 -14 -18    5.80    2.20
   3 -14 -17    1.50    2.20
   3 -14 -16    6.00    3.80
   3 -14 -15   16.00    4.10
   3 -14 -14    6.70    3.80
  -3  14  14   -1.10    3.70
   3 -14 -13   -2.50    2.80
  -3  14  13    1.60    3.30
   3 -14 -12    4.40    3.60
  -3  14  12    4.20    2.10
   3 -14 -11    1.80    2.80
  -3  14  11    5.80    2.50
   3 -14 -10    4.50    2.60
  -3  14  10    7.40    2.00
   3 -14  -9    8.20    3.40
  -3  14   9    9.80    2.00
   3 -14  -8    2.40    2.50
  -3  14   8    0.00    2.00
   3 -14  -7    8.70    2.30
  -3  14   7    8.00    1.80
   3 -14  -6   28.00    3.60
  -3  14   6   37.20    2.50
   3 -14  -5    4.80    1.90
  -3  14   5   -2.50    2.10
   3 -14  -4  141.90    7.70
  -3  14   4  150.70    6.70
   3 -14  -3    4.20    2.00
  -3  14   3    0.50    2.00
   3 -14  -2  327.90   10.30
  -3  14   2  317.20   17.10
   3 -14  -1   59.00    3.10
   3 -14   0    3.10    1.70
   3 -14   1   34.40    2.20
   3 -14   2    8.50    1.70
   3 -14   3   -3.40    2.30
   3 -14   4    5.20    2.40
   3 -14   5    9.20    2.80
   3 -14   6   -5.00    2.40
   3 -14   7   44.50    7.60
   3 -14   8   -5.00    7.30
   3 -13 -21   -3.30    8.20
   3 -13 -20   -9.80    5.80
   3 -13 -19    4.90    4.90
   3 -13 -18    3.00    2.70
   3 -13 -17   29.80    3.20
   3 -13 -16    5.30    2.40
   3 -13 -15   10.30    2.60
   3 -13 -14   -1.00    2.00
  -3  13  14   -2.80    3.50
   3 -13 -13    0.60    4.20
  -3  13  13    0.90    3.20
   3 -13 -12    6.50    4.00
  -3  13  12    4.70    1.70
   3 -13 -11    3.30    2.70
  -3  13  11    0.40    2.00
   3 -13 -10    3.20    3.50
  -3  13  10    2.70    1.90
  -3  13   9   -0.90    1.40
   3 -13  -8   -3.80    3.10
  -3  13   8    0.20    1.50
   3 -13  -7    3.20    2.00
  -3  13   7    1.90    1.50
   3 -13  -6   63.80    4.50
  -3  13   6   69.10    3.40
   3 -13  -5   33.00    3.60
  -3  13   5   32.60    2.70
   3 -13  -4    4.70    2.30
  -3  13   4    6.40    1.70
   3 -13  -3   25.00    2.70
  -3  13   3   22.30    2.40
   3 -13  -2   86.20    3.50
  -3  13   2   67.90    7.10
   3 -13  -1   12.90    1.80
  -3  13   1   15.00    5.00
   3 -13   0    3.20    1.50
  -3  13   0   -2.70    3.60
   3 -13   1   18.40    1.90
   3 -13   2    8.40    1.70
   3 -13   3   23.80    2.20
   3 -13   4   10.80    2.10
   3 -13   5   -0.40    1.60
   3 -13   6    1.90    2.50
   3 -13   7    0.60    2.60
   3 -13   8    3.90    3.00
   3 -13   9   -5.00    6.50
   3 -13  10   15.10    8.40
   3 -12 -21   -7.10    4.90
   3 -12 -20   -2.90    6.90
   3 -12 -19   -2.10    3.10
   3 -12 -18    9.90    2.70
   3 -12 -17   44.30    4.40
   3 -12 -16    5.80    2.20
  -3  12  16    2.00    3.40
   3 -12 -15  101.10    6.50
  -3  12  15  104.40    8.10
   3 -12 -14   14.10    2.70
  -3  12  14   11.00    3.00
   3 -12 -13   32.80    3.10
  -3  12  13   33.60    3.20
   3 -12 -12   31.80    2.60
  -3  12  12   25.90    3.30
   3 -12 -11    0.30    2.40
  -3  12  11   -1.60    1.50
   3 -12 -10   11.40    4.00
  -3  12  10    8.40    2.10
   3 -12  -9   20.80    3.30
  -3  12   9   15.80    2.00
   3 -12  -8   12.70    3.30
  -3  12   8    7.70    1.70
   3 -12  -7    1.40    1.70
  -3  12   7    5.00    1.40
   3 -12  -6   10.80    2.80
  -3  12   6   11.40    2.10
   3 -12  -5   -0.60    2.50
  -3  12   5    0.90    1.90
   3 -12  -4   29.20    2.50
  -3  12   4   32.50    2.50
   3 -12  -3    0.80    1.60
  -3  12   3    6.20    1.80
   3 -12  -2   42.20    2.20
  -3  12   2   40.90    5.30
   3 -12  -1   25.20    1.80
  -3  12   1   15.20    4.60
   3 -12   0   16.00    1.60
  -3  12   0   14.90    4.20
   3 -12   1   77.40    3.30
  -3  12  -1   75.60    7.30
   3 -12   2   47.90    2.50
   3 -12   3   12.80    1.60
   3 -12   4    2.00    1.80
   3 -12   5   18.20    2.00
   3 -12   6    4.40    1.80
   3 -12   7    7.80    2.70
   3 -12   8    1.30    2.20
   3 -12   9    3.50    2.00
   3 -12  10    2.30    2.60
   3 -12  11    7.60    8.10
   3 -11 -22   -1.60    6.70
   3 -11 -21    7.20    6.10
   3 -11 -20    3.00    3.10
   3 -11 -19   -1.50    2.30
   3 -11 -18    5.00    3.00
   3 -11 -17    5.10    2.80
   3 -11 -16    7.60    2.90
   3 -11 -15    4.40    2.40
  -3  11  15    6.20    4.30
   3 -11 -14   18.90    2.90
  -3  11  14   32.20    4.10
   3 -11 -13    0.20    2.00
  -3  11  13   -0.40    4.10
   3 -11 -12    9.70    2.80
  -3  11  12    8.50    2.50
   3 -11 -11   56.10    3.60
  -3  11  11   44.10    3.10
   3 -11 -10    0.50    1.60
  -3  11  10    2.50    1.60
   3 -11  -9   13.80    3.50
  -3  11   9    9.30    1.70
   3 -11  -8   42.90    3.80
  -3  11   8   47.90    2.90
   3 -11  -7   10.50    3.10
  -3  11   7    3.80    1.40
   3 -11  -6   35.90    3.50
  -3  11   6   36.60    2.30
   3 -11  -5    7.00    2.40
  -3  11   5    6.60    1.50
   3 -11  -4   29.20    2.90
  -3  11   4   35.40    2.50
   3 -11  -3    8.30    1.60
  -3  11   3   10.40    1.80
   3 -11  -2    7.20    1.70
  -3  11   2   10.30    1.60
   3 -11  -1    3.40    0.90
  -3  11   1    6.20    4.10
   3 -11   0    0.00    0.90
  -3  11   0   -1.00    2.90
   3 -11   1    8.20    1.40
  -3  11  -1    5.90    3.10
   3 -11   2  412.80   11.20
  -3  11  -2  384.70   21.00
   3 -11   3   91.70    4.20
   3 -11   4    1.10    1.60
   3 -11   5  268.90    7.80
   3 -11   6    2.60    1.60
   3 -11   7   23.60    2.50
   3 -11   8    4.00    1.80
   3 -11   9    0.80    2.70
   3 -11  10    5.10    3.10
   3 -11  11    3.90    2.60
   3 -10 -22    8.60    7.50
   3 -10 -21    3.60    5.50
   3 -10 -20   12.40    6.70
   3 -10 -19    6.60    4.90
   3 -10 -18   16.70    3.50
   3 -10 -17   -1.00    1.90
   3 -10 -16   -3.40    2.30
   3 -10 -15   31.90    3.10
  -3  10  15   25.50    5.80
   3 -10 -14   -2.30    1.60
  -3  10  14    1.90    4.00
   3 -10 -13  216.20    8.40
  -3  10  13  218.80   14.80
   3 -10 -12   -2.50    1.90
  -3  10  12   -0.60    2.10
   3 -10 -11   16.30    2.10
  -3  10  11    7.90    2.50
   3 -10 -10   42.20    3.00
  -3  10  10   38.60    2.50
   3 -10  -9   55.20    4.00
  -3  10   9   57.50    3.10
   3 -10  -8   -1.60    1.40
  -3  10   8    1.50    1.30
   3 -10  -7   43.40    4.20
  -3  10   7   41.70    2.30
   3 -10  -6    2.40    2.40
  -3  10   6    5.50    1.10
   3 -10  -5    5.20    2.10
  -3  10   5    8.40    1.40
   3 -10  -4  102.20    5.20
  -3  10   4   96.40    4.10
   3 -10  -3   26.60    2.00
  -3  10   3   25.60    2.20
   3 -10  -2    3.50    1.50
  -3  10   2    5.50    1.50
   3 -10  -1   58.60    2.40
  -3  10   1   61.90    5.10
   3 -10   0   19.40    1.40
  -3  10   0   22.40    3.60
   3 -10   1    6.10    1.20
  -3  10  -1    9.90    4.00
   3 -10   2   66.20    2.60
  -3  10  -2   70.60    5.10
   3 -10   3    7.00    1.40
   3 -10   4  472.20   13.00
   3 -10   5    4.80    1.50
   3 -10   6    1.10    1.50
   3 -10   7   10.00    1.50
   3 -10   8   18.00    2.30
   3 -10   9    8.10    2.40
   3 -10  10   24.10    3.10
   3 -10  11   -1.50    3.70
   3 -10  12   -0.10    3.10
   3 -10  13    2.50    4.80
   3  -9 -22    7.50    7.70
   3  -9 -21    9.50    6.10
   3  -9 -20   12.00    5.40
   3  -9 -19   -5.80    4.10
   3  -9 -18    9.70    6.10
   3  -9 -17    2.40    1.70
   3  -9 -16   -0.60    1.60
   3  -9 -15    9.80    1.80
  -3   9  15   19.60    6.30
   3  -9 -14  133.20    6.70
  -3   9  14  121.60   10.70
   3  -9 -13  233.20    9.20
  -3   9  13  229.30   15.40
   3  -9 -12   38.70    3.00
  -3   9  12   42.60    5.30
   3  -9 -11    3.20    1.70
  -3   9  11   -0.60    2.70
   3  -9 -10   20.90    2.30
  -3   9  10   25.80    2.50
   3  -9  -9    1.50    1.90
  -3   9   9    1.20    1.70
   3  -9  -8  245.60    8.70
  -3   9   8  246.70    8.50
   3  -9  -7    2.60    1.60
  -3   9   7    2.30    1.40
   3  -9  -6    9.70    1.80
  -3   9   6    7.40    1.40
   3  -9  -5   16.60    2.60
  -3   9   5   10.10    1.30
   3  -9  -4    4.70    1.80
  -3   9   4    0.30    1.20
   3  -9  -3   29.90    2.10
  -3   9   3   30.10    2.00
   3  -9  -2   58.00    3.00
  -3   9   2   62.70    3.00
   3  -9  -1    5.70    1.20
  -3   9   1    4.80    2.70
   3  -9   0    7.50    0.90
  -3   9   0    4.20    3.90
   3  -9   1    6.40    1.10
  -3   9  -1    1.70    2.60
   3  -9   2   35.70    1.80
  -3   9  -2   33.60    3.90
   3  -9   3   26.00    1.60
   3  -9   4    0.80    1.00
   3  -9   5   12.30    1.80
   3  -9   6   68.90    3.40
   3  -9   7   60.00    3.70
   3  -9   8   31.60    3.10
   3  -9   9   36.60    3.10
   3  -9  10   -0.30    2.80
   3  -9  11    6.80    2.90
   3  -9  12    6.60    4.90
   3  -9  13   23.50    5.60
  -3   9 -13   25.70    4.40
   3  -9  14   20.80    5.00
  -3   9 -14   28.10    5.50
   3  -8 -22   10.60    7.50
   3  -8 -21   20.60    6.50
   3  -8 -20    7.90    6.10
   3  -8 -19   -0.50    4.60
   3  -8 -18   16.40    5.70
   3  -8 -17   18.90    2.20
   3  -8 -16    9.70    2.20
   3  -8 -15   40.90    3.00
  -3   8  15   43.60    6.90
   3  -8 -14    3.20    2.00
  -3   8  14    9.40    5.90
   3  -8 -13   15.50    2.10
  -3   8  13   20.10    3.70
   3  -8 -12  663.40   21.90
  -3   8  12  666.00   31.70
   3  -8 -11   16.00    1.40
  -3   8  11   11.70    2.70
   3  -8 -10   82.80    4.10
  -3   8  10   87.80    6.00
   3  -8  -9    0.80    1.40
  -3   8   9   -0.80    1.50
   3  -8  -8   28.40    2.40
  -3   8   8   30.50    2.10
   3  -8  -7  261.90    9.00
  -3   8   7  258.50    7.80
   3  -8  -6  161.50    6.30
  -3   8   6  156.90    5.20
   3  -8  -5  216.70    7.30
  -3   8   5  211.80    5.40
   3  -8  -4  485.50   22.30
  -3   8   4  475.50   11.10
   3  -8  -3    2.80    1.50
  -3   8   3    3.50    1.00
   3  -8  -2    1.10    1.30
  -3   8   2    3.30    1.10
   3  -8  -1    6.70    1.30
  -3   8   1    8.40    1.20
   3  -8   0   17.60    1.10
  -3   8   0   18.60    3.20
   3  -8   1   -0.20    0.70
  -3   8  -1   -1.20    2.40
   3  -8   2   13.70    1.20
  -3   8  -2   15.70    3.20
   3  -8   3   -0.30    1.00
   3  -8   4   24.10    1.70
   3  -8   5    3.20    1.10
   3  -8   6   13.10    1.70
   3  -8   7    9.50    1.90
   3  -8   8   20.60    2.20
  -3   8  -8    8.90    2.70
   3  -8   9   64.30    5.70
  -3   8  -9   71.80    5.90
   3  -8  10   38.80    4.60
  -3   8 -10   48.70    5.30
   3  -8  11    6.00    3.10
  -3   8 -11    4.70    2.70
   3  -8  12    5.20    3.40
  -3   8 -12    2.60    3.20
  -3   8 -13   35.60    6.00
  -3   8 -14   29.50    6.60
  -3   8 -15   12.20    5.70
   3  -7 -22   -6.40    6.30
   3  -7 -21   11.00    6.30
   3  -7 -20   -3.40    4.80
   3  -7 -19   -1.30    6.40
   3  -7 -18    3.40    2.20
   3  -7 -17    5.70    2.10
   3  -7 -16    5.90    1.90
   3  -7 -15   31.10    2.80
  -3   7  15   25.20    5.60
   3  -7 -14    0.50    2.00
  -3   7  14   12.10    5.30
   3  -7 -13    1.50    1.50
  -3   7  13   -0.80    4.20
   3  -7 -12   17.70    2.10
  -3   7  12   15.10    3.10
   3  -7 -11   35.40    2.50
  -3   7  11   44.10    4.30
   3  -7 -10   23.70    2.20
  -3   7  10   20.20    3.10
   3  -7  -9   50.00    2.20
  -3   7   9   55.10    4.60
   3  -7  -8  279.20    8.50
  -3   7   8  292.60    9.40
   3  -7  -7   45.30    2.50
  -3   7   7   43.00    2.50
   3  -7  -6   29.60    2.40
  -3   7   6   30.20    1.90
   3  -7  -5   61.10    2.70
  -3   7   5   59.80    2.80
   3  -7  -4    0.10    1.50
  -3   7   4   -3.70    1.00
   3  -7  -3  125.00    5.60
  -3   7   3  127.30    3.40
   3  -7  -2  116.20    4.10
  -3   7   2  116.80    3.60
   3  -7  -1  294.90    9.10
  -3   7   1  287.90    9.50
   3  -7   0  103.20    3.00
  -3   7   0   99.80    7.20
   3  -7   1   20.70    1.20
  -3   7  -1   21.30    4.10
   3  -7   2   38.10    1.60
  -3   7  -2   38.60    3.70
   3  -7   3    3.70    1.00
   3  -7   4   12.60    1.20
   3  -7   5   11.80    1.40
   3  -7   6    3.90    1.40
  -3   7  -6   -1.70    2.00
   3  -7   7    3.30    2.30
  -3   7  -7    3.20    1.90
   3  -7   8   65.00    5.60
  -3   7  -8   69.60    5.10
   3  -7   9    5.40    3.20
  -3   7  -9    7.20    2.30
   3  -7  10    2.30    3.70
  -3   7 -10    5.90    3.20
   3  -7  11    6.50    3.80
  -3   7 -11    2.30    2.30
   3  -7  12   -4.00    4.60
  -3   7 -12    7.40    3.70
   3  -7  13   10.00    4.90
  -3   7 -13   11.00    3.90
  -3   7 -14   24.00    4.80
  -3   7 -15   -3.20    5.40
  -3   7 -16    4.10    5.50
   3  -6 -22   12.40    7.00
   3  -6 -21   -4.50    6.10
   3  -6 -20   11.30    7.70
   3  -6 -19    5.40    6.30
   3  -6 -18   -0.80    1.80
   3  -6 -17    8.40    2.40
   3  -6 -16    3.80    1.80
   3  -6 -15    3.50    2.10
  -3   6  15    0.90    4.20
   3  -6 -14   51.30    3.30
  -3   6  14   34.60    6.00
   3  -6 -13   40.30    4.10
  -3   6  13   30.70    5.10
   3  -6 -12    7.50    1.80
  -3   6  12   10.90    3.50
   3  -6 -11   33.70    2.20
  -3   6  11   29.80    4.70
   3  -6 -10  355.30   11.00
  -3   6  10  371.70   15.40
   3  -6  -9  853.80   23.30
  -3   6   9  843.30   35.70
   3  -6  -8  500.60   16.60
  -3   6   8  506.80   19.70
   3  -6  -7  117.80    3.50
  -3   6   7  119.70    4.60
   3  -6  -6  116.70    4.40
  -3   6   6  105.20    3.70
   3  -6  -5    9.60    1.50
  -3   6   5    7.50    1.30
   3  -6  -4   15.20    1.70
  -3   6   4   13.80    1.50
   3  -6  -3  308.50    8.80
  -3   6   3  312.60    7.40
   3  -6  -2  166.60    6.50
  -3   6   2  153.70    4.00
   3  -6  -1  272.30    9.20
  -3   6   1  275.80    7.30
   3  -6   0   83.10    4.20
  -3   6   0   90.80    6.20
   3  -6   1   34.80    1.30
  -3   6  -1   33.60    3.20
   3  -6   2   -0.30    0.80
  -3   6  -2    6.30    3.20
   3  -6   3   42.30    1.80
   3  -6   4   55.00    2.10
   3  -6   5    1.10    1.50
  -3   6  -5    3.00    1.90
   3  -6   6    1.40    2.10
  -3   6  -6    5.60    2.00
   3  -6   7   13.00    3.00
  -3   6  -7   20.50    2.20
   3  -6   8   18.20    3.40
  -3   6  -8   13.80    3.20
   3  -6   9   60.60    5.60
  -3   6  -9   61.80    6.00
   3  -6  10   43.60    5.20
  -3   6 -10   57.40    5.10
   3  -6  11   15.00    2.90
  -3   6 -11    9.60    3.80
   3  -6  12   -2.40    3.20
  -3   6 -12   -1.40    3.60
   3  -6  13   37.00    5.40
  -3   6 -13   40.80    6.10
  -3   6 -14   17.80    5.40
  -3   6 -15    8.60    4.00
  -3   6 -16    8.90    3.90
  -3   6 -17   -4.50    6.40
   3  -5 -22   -6.00    7.60
   3  -5 -21   -2.10    5.50
   3  -5 -20   -3.90    6.50
   3  -5 -19   -2.20    4.70
   3  -5 -18    0.80    4.10
   3  -5 -17   43.20    7.40
   3  -5 -16    4.90    1.90
   3  -5 -15    3.30    2.70
  -3   5  15    2.30    3.50
   3  -5 -14   42.30    3.30
  -3   5  14   39.40    7.10
   3  -5 -13    1.00    1.60
  -3   5  13   -1.80    2.60
   3  -5 -12   47.10    2.60
  -3   5  12   51.40    5.00
   3  -5 -11    0.50    2.00
  -3   5  11    5.20    3.10
   3  -5 -10   45.00    2.80
  -3   5  10   45.60    4.30
   3  -5  -9   37.60    2.50
  -3   5   9   37.20    3.50
   3  -5  -8 2660.00   77.90
  -3   5   8 2761.10  136.20
   3  -5  -7   94.10    3.80
  -3   5   7  102.50    5.00
   3  -5  -6   32.00    1.80
  -3   5   6   34.30    2.30
   3  -5  -5   51.00    2.20
  -3   5   5   48.00    2.70
   3  -5  -4    0.20    1.00
  -3   5   4    1.10    1.60
   3  -5  -3   48.30    2.10
  -3   5   3   48.00    2.30
   3  -5  -2    3.90    1.00
  -3   5   2    3.20    0.80
   3  -5  -1  140.90    3.80
  -3   5   1  148.70    4.00
   3  -5   0  306.70   14.10
  -3   5   0  308.90    9.10
   3  -5   1  505.50   17.90
  -3   5  -1  536.10   23.70
   3  -5   2  826.40   22.60
  -3   5  -2  888.70   32.70
   3  -5   3  283.30    9.00
  -3   5  -3  271.80   12.10
   3  -5   4   56.10    2.60
  -3   5  -4   55.90    3.40
   3  -5   5    9.80    1.60
  -3   5  -5   12.80    2.00
   3  -5   6   24.90    2.90
  -3   5  -6   17.80    2.20
  -3   5  -7    0.10    1.70
   3  -5   8    0.50    1.40
  -3   5  -8   -2.40    2.60
   3  -5   9    3.70    3.10
  -3   5  -9    4.30    3.10
   3  -5  10    0.10    2.80
  -3   5 -10    8.20    3.30
   3  -5  11    1.00    2.10
  -3   5 -11    1.80    3.30
   3  -5  12    2.20    3.20
  -3   5 -12   -3.00    3.50
   3  -5  13   -2.20    4.40
  -3   5 -13    2.60    2.70
   3  -5  14    3.30    4.50
  -3   5 -14    4.10    3.40
  -3   5 -15    6.20    5.40
  -3   5 -16    7.60    4.80
  -3   5 -17   16.90    6.30
  -3   5 -18    7.70    4.30
   3  -4 -22    4.40    6.90
   3  -4 -21  -16.10    9.40
   3  -4 -20    6.00    5.70
   3  -4 -19    7.70    4.60
   3  -4 -18    6.80    6.30
   3  -4 -17   15.20    4.80
   3  -4 -16    0.40    4.40
   3  -4 -15    9.40    4.90
  -3   4  15   10.40    4.40
   3  -4 -14   -2.60    3.20
  -3   4  14    1.90    3.50
   3  -4 -13    0.10    4.10
  -3   4  13    0.20    4.00
   3  -4 -12    1.30    2.80
  -3   4  12    3.70    2.90
   3  -4 -11   41.40    2.70
  -3   4  11   54.10    5.60
   3  -4 -10   26.60    2.60
  -3   4  10   28.70    3.10
   3  -4  -9  213.10    6.60
  -3   4   9  208.80    8.60
   3  -4  -8    6.40    2.10
  -3   4   8    3.50    2.20
   3  -4  -7  120.10    4.80
  -3   4   7  135.40    6.20
   3  -4  -6   91.60    3.60
  -3   4   6   77.20    5.10
   3  -4  -5    6.70    1.40
  -3   4   5    9.10    1.60
   3  -4  -4    9.20    1.10
  -3   4   4    8.00    1.30
   3  -4  -3   16.80    1.20
  -3   4   3   18.30    1.40
   3  -4  -2   -0.30    0.90
  -3   4   2   -0.70    0.80
   3  -4  -1  947.80   30.40
  -3   4   1  982.00   21.20
   3  -4   0   28.00    2.90
  -3   4   0   27.50    1.80
   3  -4   1  623.10   24.70
  -3   4  -1  647.70   23.60
   3  -4   2 2146.30   85.70
  -3   4  -2 2170.70   60.40
   3  -4   3  415.30   12.60
  -3   4  -3  419.20   12.90
   3  -4   4  400.60   11.50
  -3   4  -4  414.30   20.90
   3  -4   5   -0.10    1.10
  -3   4  -5    1.30    1.50
   3  -4   6  139.90    6.90
  -3   4  -6  152.50    7.90
   3  -4   7   22.40    3.10
  -3   4  -7   23.10    2.50
   3  -4   8   28.50    3.80
  -3   4  -8   27.40    2.90
   3  -4   9    0.10    1.60
  -3   4  -9   -0.50    2.00
   3  -4  10   -4.10    2.90
  -3   4 -10   -3.10    1.90
   3  -4  11   -2.10    2.20
  -3   4 -11   -7.30    3.20
   3  -4  12   -0.40    3.80
  -3   4 -12    0.90    4.20
   3  -4  13   16.60    4.00
  -3   4 -13   33.30    4.50
   3  -4  14   18.70    4.00
  -3   4 -14   14.60    5.10
  -3   4 -15   -3.90    3.30
  -3   4 -16    1.40    5.20
  -3   4 -17    8.80    4.80
  -3   4 -18    7.60    4.50
   3  -3 -21   23.00    9.30
   3  -3 -20   13.90    6.50
   3  -3 -19   -2.60    7.10
   3  -3 -18   -2.30    3.80
   3  -3 -17   12.50    4.90
   3  -3 -16    8.50    6.10
   3  -3 -15   10.80    3.90
   3  -3 -14   15.60    9.80
  -3   3  14    3.50    3.10
   3  -3 -13   26.60    4.80
  -3   3  13   19.80    5.20
   3  -3 -12   14.60    4.40
  -3   3  12    9.40    3.00
   3  -3 -11    3.10    2.90
  -3   3  11   -7.30    3.40
   3  -3 -10  206.80   11.80
  -3   3  10  206.20   11.90
   3  -3  -9  181.90   11.40
  -3   3   9  163.30    8.30
   3  -3  -8 1058.00   27.70
  -3   3   8 1049.30   44.60
   3  -3  -7 1012.90   29.00
  -3   3   7 1025.30   34.90
   3  -3  -6   70.70    3.10
  -3   3   6   62.90    3.60
   3  -3  -5    7.40    1.50
  -3   3   5    6.20    2.40
   3  -3  -4    6.50    1.60
  -3   3   4   14.30    2.30
   3  -3  -3   85.10    2.70
  -3   3   3   82.30    3.40
   3  -3  -2  829.70   18.90
  -3   3   2  832.50   33.10
   3  -3  -1  100.80    3.80
  -3   3   1   96.90    2.70
   3  -3   0   -0.90    2.10
  -3   3   0    0.90    1.20
   3  -3   1  105.90    5.10
  -3   3  -1  105.20    3.00
   3  -3   2   15.80    3.50
  -3   3  -2   16.10    1.00
   3  -3   3   69.40    2.80
  -3   3  -3   75.30    2.80
   3  -3   4    2.60    1.20
  -3   3  -4    0.20    1.20
   3  -3   5   15.90    2.70
  -3   3  -5   22.20    2.50
   3  -3   6  150.20    8.20
  -3   3  -6  159.40    9.10
   3  -3   7  303.20   17.20
  -3   3  -7  283.00   15.10
   3  -3   8  104.00    7.70
  -3   3  -8  111.00    5.50
   3  -3   9   16.20    3.10
  -3   3  -9   11.40    2.80
   3  -3  10    1.40    1.90
  -3   3 -10    0.00    3.00
   3  -3  11   50.00    5.50
  -3   3 -11   64.10    4.80
   3  -3  12   -3.20    3.80
  -3   3 -12   -0.50    2.80
   3  -3  13   77.60    8.20
  -3   3 -13   86.10    6.40
   3  -3  14   35.30    6.70
  -3   3 -14   30.70    4.90
  -3   3 -15    2.50    4.10
  -3   3 -16   18.60    5.20
  -3   3 -17   -2.20    3.40
  -3   3 -18    5.70    4.10
  -3   3 -19    3.30    6.90
   3  -2 -21   26.60    8.30
   3  -2 -20    6.40    5.30
   3  -2 -19   11.70    4.30
   3  -2 -18   10.40    5.90
   3  -2 -17   44.30    8.20
   3  -2 -16    5.60    3.80
   3  -2 -15   -0.70    5.50
   3  -2 -14   -3.20    3.70
  -3   2  14    5.10    3.30
   3  -2 -13    0.70    3.00
  -3   2  13    0.50    2.70
   3  -2 -12   27.90    4.90
  -3   2  12   15.00    3.90
   3  -2 -11    2.50    3.10
  -3   2  11    3.10    3.40
   3  -2 -10   54.40    4.70
  -3   2  10   55.60    4.20
   3  -2  -9    5.60    2.70
  -3   2   9   13.20    2.60
   3  -2  -8   -2.00    3.30
  -3   2   8    0.40    2.00
   3  -2  -7  292.00   13.30
  -3   2   7  313.30   12.80
   3  -2  -6   30.30    2.90
  -3   2   6   27.20    3.00
   3  -2  -5    2.60    1.50
  -3   2   5    4.00    2.60
   3  -2  -4   -2.20    1.20
  -3   2   4   -2.50    1.50
   3  -2  -3   41.90    2.40
  -3   2   3   38.40    2.50
   3  -2  -2   37.00    2.20
  -3   2   2   32.30    2.30
   3  -2  -1    1.20    0.90
  -3   2   1   -0.50    0.90
   3  -2   0   39.60    2.80
  -3   2   0   31.50    1.10
   3  -2   1    2.30    2.50
  -3   2  -1    2.00    0.60
   3  -2   2  341.40   13.80
  -3   2  -2  340.00    7.30
   3  -2   3  125.50    5.20
  -3   2  -3  133.10    4.40
   3  -2   4   46.10    2.20
  -3   2  -4   49.30    2.70
   3  -2   5    5.40    1.60
  -3   2  -5    9.60   10.80
   3  -2   6    2.30    1.40
  -3   2  -6    3.00    2.20
   3  -2   7  117.70    6.40
  -3   2  -7  138.70    7.20
   3  -2   8  105.00    6.90
  -3   2  -8   96.40    6.70
   3  -2   9   61.60    5.60
  -3   2  -9   74.90    6.60
   3  -2  10   29.20    4.00
  -3   2 -10   25.10    3.90
   3  -2  11   13.30    4.10
  -3   2 -11    2.60    2.60
   3  -2  12   29.00    4.30
  -3   2 -12   32.80    4.60
   3  -2  13    6.50    3.00
  -3   2 -13    3.00    2.80
   3  -2  14    2.70    4.20
  -3   2 -14    3.10    4.60
   3  -2  15  217.40   18.10
  -3   2 -15  248.10   17.70
  -3   2 -16    1.80    3.60
  -3   2 -17   -2.90    4.00
  -3   2 -18   34.30    6.80
  -3   2 -19    5.40    6.90
   3  -1 -21   10.20    6.00
   3  -1 -20   21.60    8.20
   3  -1 -19    4.40    5.40
   3  -1 -18    9.30    7.30
   3  -1 -17   29.10    6.60
   3  -1 -16   13.00    6.50
   3  -1 -15   18.40    4.90
   3  -1 -14   -5.60    3.30
  -3   1  14    1.90    3.80
   3  -1 -13   55.00    6.90
  -3   1  13   40.00    6.50
   3  -1 -12   -0.50    2.80
  -3   1  12   -9.20    4.30
   3  -1 -11    3.00    2.90
  -3   1  11   -2.70    2.40
   3  -1 -10    5.80    3.00
  -3   1  10    1.50    2.30
   3  -1  -9    5.70    2.80
  -3   1   9   -0.40    3.10
   3  -1  -8  158.90    8.20
  -3   1   8  159.40   12.80
   3  -1  -7   64.80    3.90
  -3   1   7   54.10    4.10
   3  -1  -6    2.00    2.40
  -3   1   6    1.80    2.00
   3  -1  -5  245.40   13.80
  -3   1   5  246.80   11.00
   3  -1  -4   13.30    2.80
  -3   1   4    8.50    2.30
   3  -1  -3   15.90    1.80
  -3   1   3   18.60    2.40
   3  -1  -2   43.00    2.90
  -3   1   2   41.60    2.80
  -3   1   1   22.60    1.60
   3  -1   0   71.70    2.80
  -3   1   0   77.10    2.30
   3  -1   1    8.80    2.90
  -3   1  -1   -1.20    0.90
   3  -1   2   10.50    1.50
  -3   1  -2    8.10    1.00
   3  -1   3   77.80    2.90
  -3   1  -3   82.70    2.60
   3  -1   4   58.40    3.00
  -3   1  -4   59.70    2.60
   3  -1   5   63.90    2.30
  -3   1  -5   76.20    3.20
   3  -1   6    3.50    1.70
  -3   1  -6    3.90    1.60
   3  -1   7    6.40    2.70
  -3   1  -7    0.10    1.50
   3  -1   8  107.40    5.80
  -3   1  -8  121.00    7.50
   3  -1   9   18.00    3.30
  -3   1  -9   11.00    2.50
   3  -1  10   86.00    4.90
  -3   1 -10   75.70    5.90
   3  -1  11  173.80    9.20
  -3   1 -11  229.90   16.10
   3  -1  12    6.80    2.70
  -3   1 -12    6.50    2.60
   3  -1  13   31.60    5.70
  -3   1 -13   21.60    3.80
   3  -1  14   27.70    5.50
  -3   1 -14   20.10    3.80
   3  -1  15   21.40    4.30
  -3   1 -15   24.50    4.30
  -3   1 -16   56.60    6.80
  -3   1 -17   10.70    3.90
  -3   1 -18    4.00    5.60
  -3   1 -19  -12.90    6.20
  -3   1 -20    5.50    4.70
   3   0 -20    3.20    6.20
   3   0 -19    3.70    6.90
   3   0 -18    3.70    4.90
   3   0 -17   32.40    7.40
   3   0 -16   54.00    7.40
   3   0 -15   19.60    5.20
   3   0 -14   23.40    6.10
   3   0 -13   80.10    8.70
  -3   0  13   73.00    8.00
   3   0 -12   16.50    4.40
  -3   0  12   13.40    4.10
   3   0 -11    2.20    3.30
  -3   0  11    0.10    2.50
   3   0 -10   -1.00    2.90
  -3   0  10    3.10    2.50
   3   0  -9    0.40    3.40
  -3   0   9    1.40    2.20
   3   0  -8    2.30    2.60
  -3   0   8   -4.20    3.60
   3   0  -7   23.00    3.90
  -3   0   7   26.70    2.90
   3   0  -6   24.10    4.70
  -3   0   6   29.20    3.40
   3   0  -5   57.00    4.30
  -3   0   5   43.00    4.00
   3   0  -4   88.20    5.20
  -3   0   4   88.20    5.10
   3   0  -3 1181.30   57.10
  -3   0   3 1221.50   47.00
   3   0  -2  140.40    6.70
  -3   0   2  136.60    6.30
  -3   0   1   35.00    1.90
   3   0   0   45.50    2.00
  -3   0   0   53.60    3.30
   3   0   1   94.10    3.50
  -3   0  -1  104.70    4.10
   3   0   2  183.40    5.90
  -3   0  -2  181.00    3.80
   3   0   3    2.10    1.30
  -3   0  -3   -1.30    1.10
   3   0   4    0.50    1.00
  -3   0  -4    0.10    1.00
   3   0   5    2.30    1.00
  -3   0  -5    3.80    1.20
   3   0   6   20.00    3.00
  -3   0  -6   22.10    3.50
   3   0   7    3.90    2.60
  -3   0  -7    3.20    2.10
   3   0   8   38.60    4.10
  -3   0  -8   35.70    3.40
   3   0   9   -0.90    3.20
  -3   0  -9    2.20    1.70
   3   0  10   31.80    3.70
  -3   0 -10   25.90    4.40
   3   0  11   29.70    3.70
  -3   0 -11   50.30    4.30
   3   0  12   28.90    4.30
  -3   0 -12   24.60    4.40
   3   0  13    0.50    4.60
  -3   0 -13    7.70    4.80
   3   0  14   -4.70    3.20
  -3   0 -14    0.40    4.10
   3   0  15  323.10   23.20
  -3   0 -15  343.80   21.40
  -3   0 -16    9.30    4.50
  -3   0 -17   -0.30    5.00
  -3   0 -18   15.60    7.00
  -3   0 -19   17.90    6.90
  -3   0 -20    0.90    6.40
  -3   0 -21   -4.10    7.20
   3   1 -20   -1.00    6.20
   3   1 -19   19.60    7.20
   3   1 -18    1.90    6.10
   3   1 -17    2.90    4.30
   3   1 -16    1.90    4.30
   3   1 -15   18.80    6.90
   3   1 -14   22.40    4.80
   3   1 -13    2.70    4.70
  -3  -1  13    2.60    3.50
   3   1 -12    7.60    4.10
  -3  -1  12    7.40    3.90
   3   1 -11    7.10    3.60
  -3  -1  11    2.90    3.10
   3   1 -10   97.60    6.60
  -3  -1  10   88.00    8.60
   3   1  -9    6.70    3.10
  -3  -1   9   11.70    3.00
   3   1  -8   16.10    4.50
  -3  -1   8    5.70    3.40
   3   1  -7    4.80    2.80
  -3  -1   7    3.60    2.40
   3   1  -6  108.20  113.70
  -3  -1   6  252.70   67.00
   3   1  -5   84.20    7.80
  -3  -1   5   70.20    7.50
   3   1  -4  136.60    7.50
  -3  -1   4  143.20    6.70
   3   1  -3    1.40    2.80
  -3  -1   3   -0.60    1.60
   3   1  -2   71.90    4.80
  -3  -1   2   67.70    3.20
  -3  -1   1   60.50    2.90
   3   1   0  129.20    7.00
  -3  -1   0  143.50    7.00
   3   1   1  226.90    9.90
  -3  -1  -1  242.10    7.20
   3   1   2  172.20    6.70
  -3  -1  -2  163.80    6.90
   3   1   3 1754.10   57.10
  -3  -1  -3 1798.10   43.10
   3   1   4   59.50    3.20
  -3  -1  -4   56.70    2.10
   3   1   5   73.90    3.30
  -3  -1  -5   71.00    2.60
   3   1   6   47.50    2.50
  -3  -1  -6   44.00    2.10
   3   1   7   67.30    5.40
  -3  -1  -7   73.90    4.00
   3   1   8  135.40    6.30
  -3  -1  -8  137.40    7.40
   3   1   9   28.90    3.40
  -3  -1  -9   17.80    3.30
   3   1  10   -1.10    2.00
  -3  -1 -10   -8.40    3.00
   3   1  11  216.40   12.60
  -3  -1 -11  196.20   11.10
   3   1  12    5.60    2.90
  -3  -1 -12    8.80    4.00
   3   1  13   27.30    4.50
  -3  -1 -13   22.80    3.90
   3   1  14   25.90    4.70
  -3  -1 -14   31.30    4.60
   3   1  15   95.10    8.50
  -3  -1 -15  130.10   10.10
  -3  -1 -16  114.10    8.50
  -3  -1 -17   18.60    6.90
  -3  -1 -18   13.40    6.40
  -3  -1 -19   14.10    6.10
  -3  -1 -20   -2.10    6.40
  -3  -1 -21    0.90    7.50
   3   2 -19   30.70    7.20
   3   2 -18    0.50    5.90
   3   2 -17   10.30    7.10
   3   2 -16   -2.80    4.30
   3   2 -15   18.40    5.20
   3   2 -14    0.10    4.30
   3   2 -13   74.00    8.60
   3   2 -12  147.90   12.10
  -3  -2  12  166.60   12.10
   3   2 -11    5.20    4.40
  -3  -2  11   11.10    4.80
   3   2 -10   17.60    3.80
  -3  -2  10   18.50    3.80
   3   2  -9    3.50    3.30
  -3  -2   9    2.80    2.70
   3   2  -8   39.90    5.30
  -3  -2   8   32.80    4.10
   3   2  -7   15.30    2.70
  -3  -2   7   21.00    4.30
   3   2  -6  109.20    6.20
  -3  -2   6  108.00    5.80
   3   2  -5   40.40    4.40
  -3  -2   5   38.60    4.10
   3   2  -4   72.30    5.10
  -3  -2   4   58.50    5.10
   3   2  -3  218.40   10.20
  -3  -2   3  227.30    9.80
  -3  -2   2   -1.10    1.70
  -3  -2   1   68.80    3.30
   3   2   0    9.40    3.30
  -3  -2   0   -3.90    2.30
   3   2   1   84.30    5.70
  -3  -2  -1   70.50    4.10
   3   2   2 1807.10   67.80
  -3  -2  -2 1769.30   75.30
   3   2   3   85.90    2.60
  -3  -2  -3   79.30    5.40
   3   2   4   18.50    1.40
  -3  -2  -4   17.70    1.30
   3   2   5  227.30   10.20
  -3  -2  -5  216.40    5.90
   3   2   6  421.40   13.20
  -3  -2  -6  425.80   11.20
   3   2   7    6.80    2.20
  -3  -2  -7    7.30    1.20
   3   2   8  144.20    7.90
  -3  -2  -8  142.80    5.40
   3   2   9   63.00    4.80
  -3  -2  -9   59.80    4.30
   3   2  10  210.10   10.10
  -3  -2 -10  205.80   12.80
   3   2  11   17.60    4.10
  -3  -2 -11   13.80    3.30
   3   2  12    2.30    2.90
  -3  -2 -12   -1.10    2.40
   3   2  13    6.90    4.20
  -3  -2 -13   13.70    4.60
   3   2  14    2.00    4.90
  -3  -2 -14   -1.90    3.20
   3   2  15   -8.20    5.50
  -3  -2 -15    2.10    3.10
  -3  -2 -16   94.40    8.10
  -3  -2 -17   17.50    5.80
  -3  -2 -18   10.90    5.60
  -3  -2 -19    1.60    4.00
  -3  -2 -20   11.90    5.10
  -3  -2 -21   12.40    5.40
   3   3 -19    8.60    6.60
   3   3 -18    9.30    6.00
   3   3 -17   -5.60    4.60
   3   3 -16   -2.60    4.10
   3   3 -15    0.70    6.90
   3   3 -14   18.40    6.60
   3   3 -13   31.80    5.30
   3   3 -12   94.00    8.30
  -3  -3  12  114.50    9.00
   3   3 -11   -4.30    4.90
  -3  -3  11    3.90    5.10
   3   3 -10   92.20    6.50
  -3  -3  10   83.90    7.90
   3   3  -9    9.80    3.60
  -3  -3   9    2.60    3.90
   3   3  -8    1.00    3.60
  -3  -3   8   -3.90    2.50
   3   3  -7  164.30    8.30
  -3  -3   7  161.40    9.60
   3   3  -6   30.40    3.50
  -3  -3   6   30.40    3.80
   3   3  -5   -2.70    3.80
  -3  -3   5   -0.60    2.00
   3   3  -4   17.90    3.30
  -3  -3   4   23.90    3.00
  -3  -3   3    9.70    2.10
  -3  -3   2  140.10    5.60
   3   3  -1   33.50    3.30
  -3  -3   1   32.60    2.40
   3   3   0   43.50    3.80
  -3  -3   0   40.40    4.00
   3   3   1  396.50   18.20
  -3  -3  -1  390.10   30.00
   3   3   2  185.10    8.10
  -3  -3  -2  182.20    7.60
   3   3   3  371.20   10.00
  -3  -3  -3  364.70   13.70
   3   3   4   17.40    1.20
  -3  -3  -4   19.50    1.90
   3   3   5  371.60   10.80
  -3  -3  -5  369.50   13.30
   3   3   6 1307.40   63.70
  -3  -3  -6 1250.50   29.90
   3   3   7  507.20   15.50
  -3  -3  -7  523.00   14.40
   3   3   8  245.70   11.00
  -3  -3  -8  244.30    6.60
   3   3   9   14.00    3.90
  -3  -3  -9   20.90    1.30
   3   3  10   -0.80    2.60
  -3  -3 -10    3.90    1.60
   3   3  11   63.60    5.30
  -3  -3 -11   54.00    5.20
  -3  -3 -12    1.70    4.20
   3   3  13   -1.00    2.90
  -3  -3 -13    3.20    3.00
   3   3  14   31.70    4.00
  -3  -3 -14   35.40    4.10
   3   3  15   42.10    6.90
  -3  -3 -15   42.90    4.90
  -3  -3 -16    7.50    5.10
  -3  -3 -17   17.70    5.80
  -3  -3 -18   -1.20    3.80
  -3  -3 -19   23.90    5.80
  -3  -3 -20    3.00    4.40
  -3  -3 -21    3.50    5.20
   3   4 -18   -0.80    6.30
   3   4 -17   13.40    7.70
   3   4 -16   -5.50    4.00
   3   4 -15    8.80    5.10
   3   4 -14  118.90   10.50
   3   4 -13  101.00    8.90
   3   4 -12  178.90   10.60
   3   4 -11    7.10    3.70
  -3  -4  11   19.40    5.00
   3   4 -10    7.40    5.30
  -3  -4  10    4.10    3.10
   3   4  -9  354.20   16.20
  -3  -4   9  347.30   29.30
   3   4  -8   57.40    6.40
  -3  -4   8   70.50    5.60
   3   4  -7   21.20    5.70
  -3  -4   7    1.70    2.70
   3   4  -6  537.30   24.60
  -3  -4   6  580.40   25.30
   3   4  -5   28.70    9.00
  -3  -4   5   23.60    3.10
   3   4  -4   -1.30    2.50
  -3  -4   4    3.30    1.90
  -3  -4   3  272.60    8.70
  -3  -4   2    1.20    1.60
   3   4  -1   14.20    2.60
  -3  -4   1   12.40    1.50
   3   4   0  110.50    6.40
  -3  -4   0  124.00    6.10
   3   4   1    0.30    1.80
  -3  -4  -1    0.70    3.30
   3   4   2 1491.20   59.80
  -3  -4  -2 1443.70   51.00
   3   4   3    1.10    3.20
  -3  -4  -3    3.60    2.10
   3   4   4   52.40    2.70
  -3  -4  -4   44.50    4.00
   3   4   5   40.80    1.50
  -3  -4  -5   47.00    3.70
   3   4   6    2.60    1.30
  -3  -4  -6    3.80    1.90
   3   4   7  912.00   45.60
  -3  -4  -7  874.90   25.00
   3   4   8  435.30   15.20
  -3  -4  -8  437.60   10.40
   3   4   9   31.70    4.40
  -3  -4  -9   29.00    1.40
   3   4  10  176.20    9.10
  -3  -4 -10  166.70    4.60
   3   4  11   27.70    4.80
  -3  -4 -11   27.50    2.20
   3   4  12    1.30    3.90
  -3  -4 -12   10.20    1.60
   3   4  13  125.50    8.30
  -3  -4 -13  127.90    6.00
   3   4  14    7.90    3.80
  -3  -4 -14    4.30    1.60
   3   4  15   13.50    4.10
  -3  -4 -15   24.00    4.50
  -3  -4 -16   22.90    5.80
  -3  -4 -17    2.10    4.20
  -3  -4 -18    2.80    3.90
  -3  -4 -19   33.30    8.30
  -3  -4 -20   32.90    8.90
  -3  -4 -21    7.10    5.40
  -3  -4 -22   12.00    5.90
   3   5 -18    5.10    5.80
   3   5 -17    1.90    4.30
   3   5 -16    7.20    4.20
   3   5 -15   63.10    7.30
   3   5 -14   10.90    4.60
   3   5 -13   40.70    5.70
   3   5 -12   61.60    7.70
   3   5 -11   11.70    4.30
  -3  -5  11   12.40    5.00
   3   5 -10    1.70    3.90
  -3  -5  10   -0.10    5.10
   3   5  -9    4.10    3.60
  -3  -5   9    5.40    3.10
   3   5  -8    6.60    3.20
  -3  -5   8    5.20    3.00
   3   5  -7    2.40    3.10
  -3  -5   7    6.90    2.90
   3   5  -6    7.90    3.30
  -3  -5   6    8.50    2.60
  -3  -5   5   15.80    2.70
  -3  -5   4   36.20    2.60
  -3  -5   3  602.10   20.30
  -3  -5   2 1102.10   32.30
   3   5  -1   37.30    3.60
  -3  -5   1   36.70    2.60
   3   5   0    9.90    2.20
  -3  -5   0    7.80    3.70
   3   5   1   15.50    2.40
  -3  -5  -1   11.10    3.60
   3   5   2  135.50    6.80
  -3  -5  -2  139.30    7.90
   3   5   3  219.90   12.10
  -3  -5  -3  211.40    9.50
   3   5   4   91.40    6.30
  -3  -5  -4   79.00    5.40
   3   5   5   31.90    2.00
  -3  -5  -5   38.10    3.50
   3   5   6    3.90    0.80
  -3  -5  -6   -0.90    2.50
   3   5   7   19.40    1.50
  -3  -5  -7   15.70    3.70
   3   5   8   25.70    3.50
  -3  -5  -8   27.30    4.40
   3   5   9   57.80    4.80
  -3  -5  -9   58.70    2.60
   3   5  10   15.80    4.00
  -3  -5 -10   22.70    1.60
   3   5  11   58.20    4.50
  -3  -5 -11   47.10    1.90
   3   5  12   46.20    4.80
  -3  -5 -12   43.20    1.80
   3   5  13   -4.50    4.60
  -3  -5 -13   -1.30    1.60
   3   5  14  100.20    8.00
  -3  -5 -14  102.10    4.60
   3   5  15   65.20    7.60
  -3  -5 -15   63.20    3.60
  -3  -5 -16    1.80    1.70
  -3  -5 -17   23.80    2.50
  -3  -5 -18    2.00    1.50
  -3  -5 -19    9.10    2.10
  -3  -5 -20    9.80    5.60
  -3  -5 -21    6.70    6.10
  -3  -5 -22   66.10   11.50
   3   6 -17    2.80    7.20
   3   6 -16    4.30    7.20
   3   6 -15    2.50    4.90
   3   6 -14   -3.10    4.10
   3   6 -13    3.30    4.80
   3   6 -12    8.20    6.00
   3   6 -11   31.90    5.30
   3   6 -10   -6.00    3.50
  -3  -6  10   -1.80    3.50
   3   6  -9   89.70    7.80
  -3  -6   9   86.50    8.30
   3   6  -8   57.30    6.40
  -3  -6   8   61.50    7.60
   3   6  -7   32.10    4.50
  -3  -6   7   22.90    2.80
  -3  -6   6    0.10    2.10
  -3  -6   5    6.00    2.60
  -3  -6   4    1.80    1.80
  -3  -6   3  126.90    5.50
  -3  -6   2   -0.50    2.80
   3   6  -1 1137.80   42.00
  -3  -6   1 1099.70   30.50
   3   6   0  364.90   21.80
  -3  -6   0  345.20   14.60
   3   6   1    3.70    2.80
  -3  -6  -1    1.40    3.90
   3   6   2  302.40   13.00
  -3  -6  -2  272.30   11.80
   3   6   3    9.10    2.50
  -3  -6  -3    5.70    2.50
   3   6   4   67.30    5.00
  -3  -6  -4   67.10    4.40
   3   6   5    3.80    2.60
  -3  -6  -5   12.40    3.80
   3   6   6   10.80    1.50
  -3  -6  -6   10.10    0.90
   3   6   7  114.00    4.50
  -3  -6  -7  100.30    6.60
   3   6   8   83.00    5.50
  -3  -6  -8   95.50    7.00
   3   6   9    7.20    2.90
  -3  -6  -9    3.70    2.60
   3   6  10   14.70    4.20
  -3  -6 -10   23.00    5.40
   3   6  11   40.60    2.30
  -3  -6 -11   36.10    2.00
   3   6  12   10.10    3.40
  -3  -6 -12   15.90    1.00
   3   6  13   19.70    3.90
  -3  -6 -13   15.70    1.10
   3   6  14   12.60    5.40
  -3  -6 -14    2.10    0.90
   3   6  15    0.00    3.50
  -3  -6 -15   -0.10    1.30
  -3  -6 -16   11.00    2.00
  -3  -6 -17   10.70    1.90
  -3  -6 -18   77.50    4.00
  -3  -6 -19   14.60    2.10
  -3  -6 -20   -2.10    6.10
  -3  -6 -21   -9.90    5.10
  -3  -6 -22   21.80    6.30
   3   7 -16   13.10    6.10
   3   7 -15   55.70    8.80
   3   7 -14    1.50    4.50
   3   7 -13    2.80    4.60
   3   7 -12    6.00    5.00
   3   7 -11   16.90    5.40
   3   7 -10   16.50    4.40
  -3  -7  10    6.90    4.30
   3   7  -9    4.20    3.60
  -3  -7   9   11.70    3.00
  -3  -7   8   51.30    3.80
  -3  -7   7   10.10    3.60
  -3  -7   6   71.80    4.90
  -3  -7   5    1.70    2.10
  -3  -7   4  152.70    5.50
  -3  -7   3   31.80    2.80
  -3  -7   2    1.60    1.80
   3   7  -1    0.50    2.50
  -3  -7   1    7.10    2.30
   3   7   0   21.20    3.20
  -3  -7   0   18.00    3.80
   3   7   1 3234.40  135.10
  -3  -7  -1 3103.30  112.60
   3   7   2    4.80    2.50
  -3  -7  -2    4.80    3.00
   3   7   3  379.10   15.00
  -3  -7  -3  359.40   21.50
   3   7   4    7.80    2.90
  -3  -7  -4    5.50    2.50
   3   7   5   20.30    3.10
  -3  -7  -5    3.60    2.90
   3   7   6   16.70    3.10
  -3  -7  -6   18.30    1.50
   3   7   7   17.90    1.90
  -3  -7  -7   16.10    3.20
   3   7   8   22.80    1.70
  -3  -7  -8   20.20    4.80
   3   7   9   24.80    3.60
  -3  -7  -9   16.30    4.80
   3   7  10    9.00    4.30
  -3  -7 -10    4.80    2.80
   3   7  11   10.00    3.40
  -3  -7 -11    2.60    3.50
   3   7  12    1.30    0.70
  -3  -7 -12   -1.40    3.00
   3   7  13    2.80    0.80
  -3  -7 -13    0.20    3.10
   3   7  14   26.70    5.20
  -3  -7 -14   23.40    1.30
   3   7  15   -3.00    4.90
  -3  -7 -15   -0.90    0.70
  -3  -7 -16    5.80    1.30
  -3  -7 -17    9.00    1.00
  -3  -7 -18   29.90    1.70
  -3  -7 -19    1.50    3.90
  -3  -7 -20   12.60    5.60
  -3  -7 -21    2.70    7.60
  -3  -7 -22   12.80    8.10
  -3  -8  15   -9.10    7.10
  -3  -8  14   -7.70    5.80
  -3  -8  13    5.90    6.70
  -3  -8  12   11.00    6.00
  -3  -8  11   12.00    5.40
  -3  -8  10   20.00    6.70
  -3  -8   9    6.30    3.40
  -3  -8   8   76.60    5.30
  -3  -8   7   11.30    2.70
  -3  -8   6   23.30    2.90
  -3  -8   5   40.60    3.40
  -3  -8   4   22.60    2.90
  -3  -8   3    2.50    2.20
  -3  -8   2    4.80    2.40
  -3  -8   1   18.70    3.10
   3   8   0   45.20    4.50
  -3  -8   0   55.20    4.20
   3   8   1    9.80    4.10
  -3  -8  -1   14.70    4.20
   3   8   2 1324.20   50.10
  -3  -8  -2 1212.60   43.80
   3   8   3   85.60    5.20
  -3  -8  -3   81.20    5.40
   3   8   4   21.90    3.80
  -3  -8  -4   22.70    4.60
   3   8   5    6.10    3.00
  -3  -8  -5    0.90    4.30
   3   8   6   55.10    4.30
  -3  -8  -6   65.80    3.00
   3   8   7   12.30    4.10
  -3  -8  -7   14.10    1.40
   3   8   8   76.90    3.50
  -3  -8  -8   80.70    5.70
   3   8   9    3.00    1.00
  -3  -8  -9    3.50    3.30
   3   8  10   11.30    5.30
  -3  -8 -10    2.20    3.60
   3   8  11   10.30    4.10
  -3  -8 -11    4.80    4.20
   3   8  12   12.90    4.30
  -3  -8 -12    9.10    3.60
   3   8  13   14.00    1.10
  -3  -8 -13   17.10    3.70
   3   8  14   14.60    1.30
  -3  -8 -14   26.50    5.40
   3   8  15    1.40    1.20
  -3  -8 -15   -1.30    3.90
  -3  -8 -16    6.70    3.80
  -3  -8 -17    2.60    0.60
  -3  -8 -18   68.30    3.80
  -3  -8 -19   22.00    7.00
  -3  -8 -20   11.70    5.30
  -3  -8 -21    1.00    5.20
  -3  -8 -22    8.60    6.80
  -3  -9  15    8.00    6.30
  -3  -9  14   -1.20    4.60
  -3  -9  13    6.90    5.00
  -3  -9  12   10.20    4.90
  -3  -9  11    9.50    6.80
  -3  -9  10   51.20    6.20
  -3  -9   9   12.40    5.80
  -3  -9   8   -6.00    3.80
  -3  -9   7  100.90    5.60
  -3  -9   6    1.10    2.50
  -3  -9   5   83.40    4.80
  -3  -9   4   35.20    3.20
  -3  -9   3    7.40    2.30
  -3  -9   2  414.40   14.70
  -3  -9   1  102.10    5.00
   3   9   0   57.60    4.20
  -3  -9   0   62.50    5.60
   3   9   1  193.10   11.20
  -3  -9  -1  225.20   10.90
   3   9   2   17.20    4.30
  -3  -9  -2   10.80    4.50
   3   9   3    3.70    3.80
  -3  -9  -3   15.90    3.10
   3   9   4    2.30    3.70
  -3  -9  -4    3.50    2.90
   3   9   5   11.30    4.50
  -3  -9  -5   11.90    3.90
   3   9   6   62.50    4.80
  -3  -9  -6   69.60    3.40
   3   9   7   63.40    6.20
  -3  -9  -7   53.10    2.70
   3   9   8   14.70    3.60
  -3  -9  -8   14.60    3.60
   3   9   9  166.40    6.00
  -3  -9  -9  171.40   11.20
   3   9  10   -3.80    4.10
  -3  -9 -10    2.10    2.70
   3   9  11    3.60    3.30
  -3  -9 -11    1.60    3.10
   3   9  12   14.10    5.10
  -3  -9 -12   17.30    5.10
   3   9  13    8.30    5.00
  -3  -9 -13    2.90    5.00
   3   9  14    3.20    4.90
  -3  -9 -14   -5.60    3.50
   3   9  15    2.10    1.00
  -3  -9 -15    1.80    3.70
   3   9  16    3.80    1.20
  -3  -9 -16    5.60    5.70
   3   9  17   22.30    2.30
  -3  -9 -17   17.20    4.90
   3   9  18    4.50    1.60
  -3  -9 -18    4.30    4.50
  -3  -9 -19   -2.60    4.00
  -3  -9 -20    3.30    7.00
  -3  -9 -21    8.60    6.20
  -3  -9 -22    9.90    6.50
  -3 -10  14   -1.10    7.60
  -3 -10  13    5.60    7.10
  -3 -10  12    1.70    4.70
  -3 -10  11    3.20    4.70
  -3 -10  10    0.30    5.60
  -3 -10   9    8.50    3.80
  -3 -10   8   -3.90    4.80
  -3 -10   7   17.40    5.80
  -3 -10   6    0.30    3.00
  -3 -10   5   33.10    3.60
  -3 -10   4   13.10    3.10
  -3 -10   3   27.80    3.60
  -3 -10   2   54.90    4.00
  -3 -10   1  108.00    5.20
   3  10   0   12.40    3.20
  -3 -10   0   14.60    4.10
   3  10   1   29.00    4.10
  -3 -10  -1   21.70    4.70
   3  10   2  104.60    7.50
  -3 -10  -2   80.40    6.20
   3  10   3   90.20    6.10
  -3 -10  -3  101.60    7.20
   3  10   4   15.20    3.50
  -3 -10  -4   20.40    3.30
   3  10   5   80.80    5.80
  -3 -10  -5   97.90    7.60
   3  10   6    2.70    3.00
  -3 -10  -6    1.20    1.60
   3  10   7    2.00    3.90
  -3 -10  -7    1.40    1.30
   3  10   8  105.90    3.70
  -3 -10  -8  110.00    4.30
   3  10   9  142.00    6.30
  -3 -10  -9  136.80    8.10
   3  10  10   13.90    1.60
  -3 -10 -10   16.60    4.30
   3  10  11    3.40    3.90
  -3 -10 -11    8.60    3.70
   3  10  12   17.30    5.30
  -3 -10 -12    3.80    3.70
   3  10  13    9.20    3.80
  -3 -10 -13    6.80    4.30
   3  10  14    6.70    3.80
  -3 -10 -14    4.80    4.30
  -3 -10 -15    7.40    3.70
  -3 -10 -16   -4.80    5.70
   3  10  17   38.60    3.20
  -3 -10 -17   35.10    5.80
  -3 -10 -18   16.20    7.10
  -3 -10 -19   74.70    9.50
  -3 -10 -20   57.40    9.30
  -3 -10 -21   31.40    7.50
  -3 -10 -22   24.20    7.70
  -3 -11  13   -0.30    6.10
  -3 -11  11    9.10    5.00
  -3 -11  10    7.80    4.80
  -3 -11   9   -2.90    5.60
  -3 -11   8   -2.70    3.60
  -3 -11   7    2.40    4.10
  -3 -11   6    7.30    4.10
  -3 -11   5   80.90    4.90
  -3 -11   4  274.10   11.10
  -3 -11   3   13.00    2.90
  -3 -11   2    3.90    2.60
  -3 -11   1    1.90    2.50
   3  11   0   -0.10    2.70
  -3 -11   0    4.00    2.60
   3  11   1   75.30    6.40
  -3 -11  -1   78.50    7.20
   3  11   2   -3.50    4.30
  -3 -11  -2    4.60    4.50
   3  11   3   -1.30    2.90
  -3 -11  -3    5.00    2.80
   3  11   4    5.50    4.40
  -3 -11  -4   -0.10    2.50
   3  11   5   69.50    4.80
  -3 -11  -5   68.10    6.80
   3  11   6    2.60    4.10
  -3 -11  -6    2.90    1.80
   3  11   7    0.30    2.80
  -3 -11  -7    0.50    1.40
   3  11   8   -0.10    1.00
  -3 -11  -8    1.70    1.80
   3  11   9   20.10    1.10
  -3 -11  -9   27.30    4.30
   3  11  10   10.20    1.60
  -3 -11 -10    7.00    3.30
   3  11  11   97.70    9.30
  -3 -11 -11  102.10    7.20
   3  11  12   77.10    8.20
  -3 -11 -12   82.80    7.70
   3  11  13   -0.90    3.30
  -3 -11 -13   -0.80    3.60
  -3 -11 -14    3.30    4.50
  -3 -11 -15   11.50    5.30
  -3 -11 -16   -6.20    5.60
  -3 -11 -17    1.90    4.50
  -3 -11 -18    0.10    5.80
  -3 -11 -19   12.00    5.20
  -3 -11 -20    1.20    5.40
  -3 -11 -21    1.90    5.30
  -3 -11 -22   -2.30    5.30
  -3 -12  11    9.80    4.90
  -3 -12  10    7.00    6.60
  -3 -12   9    3.00    4.70
  -3 -12   8   -3.70    4.10
  -3 -12   7    0.20    5.50
  -3 -12   6   40.20    5.00
  -3 -12   5    1.50    3.30
  -3 -12   4    6.30    5.80
  -3 -12   3  169.40    8.80
  -3 -12   2   39.10    4.10
  -3 -12   1    5.50    2.90
  -3 -12   0  168.90    8.50
   3  12   1    8.30    3.20
  -3 -12  -1    4.80    3.20
   3  12   2   22.20    4.80
  -3 -12  -2   24.40    3.90
   3  12   3   11.60    3.30
  -3 -12  -3   12.80    3.70
   3  12   4   12.90    3.80
  -3 -12  -4   21.40    4.50
   3  12   5   63.40    6.40
  -3 -12  -5   68.60    4.10
   3  12   6    0.40    3.10
  -3 -12  -6   -1.30    2.50
   3  12   7   48.00    5.40
  -3 -12  -7   44.70    3.30
   3  12   8   37.50    6.20
  -3 -12  -8   34.40    2.80
   3  12   9   11.30    1.10
  -3 -12  -9   12.50    4.30
   3  12  10    6.70    4.00
  -3 -12 -10   -2.50    5.10
   3  12  11   11.00    1.30
  -3 -12 -11   -0.70    4.90
   3  12  12  100.50    7.00
  -3 -12 -12  111.60    9.00
  -3 -12 -13    3.20    4.20
  -3 -12 -14    8.00    4.80
  -3 -12 -15   11.50    3.40
  -3 -12 -16    2.00    5.80
  -3 -12 -17   19.50    5.60
  -3 -12 -18   20.30    6.80
  -3 -12 -19    0.40    4.90
  -3 -12 -20   13.70    8.50
  -3 -12 -21    7.30    5.90
  -3 -12 -22   -8.80    5.10
  -3 -13  10   -0.50    4.50
  -3 -13   9    7.80    6.80
  -3 -13   8    2.60    4.70
  -3 -13   7    5.60    4.10
  -3 -13   6   -2.10    5.90
  -3 -13   5    3.20    5.10
  -3 -13   4   27.30    5.90
  -3 -13   3    3.00    4.10
  -3 -13   2   18.30    3.40
  -3 -13   1   91.80    6.00
  -3 -13   0   16.70    3.20
   3  13   1   87.80    7.00
  -3 -13  -1  110.70    7.90
   3  13   2    5.30    3.90
  -3 -13  -2    0.30    4.70
   3  13   3   -2.00    5.10
  -3 -13  -3   -8.40    4.80
   3  13   4    0.20    3.80
  -3 -13  -4   11.70    5.10
   3  13   5   -1.50    3.50
  -3 -13  -5    7.60    2.80
   3  13   6   69.90    7.40
  -3 -13  -6   60.70    4.00
   3  13   7    0.20    5.50
  -3 -13  -7    2.80    2.20
   3  13   8   -2.30    5.00
  -3 -13  -8    2.10    1.80
   3  13   9    1.00    1.30
  -3 -13  -9    1.80    2.00
   3  13  10    6.20    5.50
  -3 -13 -10    5.30    3.90
   3  13  11    1.30    1.40
  -3 -13 -11   -0.80    3.70
  -3 -13 -12    7.10    5.80
  -3 -13 -13   65.00    6.80
  -3 -13 -14   39.50    5.30
  -3 -13 -15   -1.90    4.20
  -3 -13 -16   40.10    7.50
  -3 -13 -17    7.90    4.50
  -3 -13 -18    2.00    7.40
  -3 -13 -19    1.80    6.00
  -3 -13 -20  -14.90    7.80
  -3 -13 -21   -7.00    5.40
  -3 -13 -22   -2.50    5.10
  -3 -14   9   -4.30    5.20
  -3 -14   8   31.40    8.60
  -3 -14   7   11.70    6.10
  -3 -14   6   14.70    5.40
  -3 -14   5    7.20    5.00
  -3 -14   4    2.00    4.00
  -3 -14   3    1.50    3.50
  -3 -14   2   -3.00    3.90
  -3 -14   1    0.50    5.30
  -3 -14   0   24.10    3.30
   3  14   1   -0.80    3.80
  -3 -14  -1    1.70    3.10
   3  14   2   33.60    4.10
  -3 -14  -2   28.30    4.10
   3  14   3    7.50    4.80
  -3 -14  -3   -4.20    3.20
   3  14   4    0.40    4.80
  -3 -14  -4    2.60    3.90
   3  14   5    6.20    3.90
  -3 -14  -5   -1.20    2.00
   3  14   6   67.60    7.20
  -3 -14  -6   89.30    5.10
   3  14   7   11.40    4.20
  -3 -14  -7    7.10    2.60
   3  14   8    1.00    3.80
  -3 -14  -8   -0.10    2.80
   3  14   9   12.20    1.90
  -3 -14  -9   14.00    2.90
   3  14  10    2.20    1.20
  -3 -14 -10   -5.30    4.80
  -3 -14 -11    5.20    4.30
   3  14  12    4.00    1.30
  -3 -14 -12    4.90    4.00
  -3 -14 -13   74.10    7.40
  -3 -14 -14   24.10    6.60
  -3 -14 -15   11.60    5.20
  -3 -14 -16   -0.50    4.60
  -3 -14 -17    1.40    6.30
  -3 -14 -18    3.30    4.80
  -3 -14 -19   -5.60    5.40
  -3 -14 -20    7.40    5.60
  -3 -14 -21   -2.60    5.60
  -3 -15   8    3.30    5.50
  -3 -15   7    9.40    5.40
  -3 -15   6    6.10    6.20
  -3 -15   5    4.10    6.30
  -3 -15   4   -3.80    3.90
  -3 -15   3    2.50    4.50
  -3 -15   2   -1.00    5.70
  -3 -15   1   28.10    6.60
  -3 -15   0   -1.80    3.70
  -3 -15  -1  163.90   11.20
  -3 -15  -2   34.70    5.60
   3  15   3   27.00    5.70
  -3 -15  -3   17.50    5.30
   3  15   4   63.70    8.60
  -3 -15  -4   84.90    5.30
   3  15   5   25.10    6.40
  -3 -15  -5   35.10    3.60
   3  15   6   40.20    6.90
  -3 -15  -6   43.80    3.90
   3  15   7  128.50   10.70
  -3 -15  -7  121.70    6.60
   3  15   8   23.70    3.30
  -3 -15  -8   25.10    3.60
   3  15   9   14.80    2.00
  -3 -15  -9   17.30    3.00
   3  15  10   39.50    2.50
  -3 -15 -10   46.50    5.60
  -3 -15 -11   20.10    5.40
   3  15  12   84.20    4.10
  -3 -15 -12   61.40    7.80
  -3 -15 -13    1.10    5.60
  -3 -15 -14    4.00    4.60
  -3 -15 -15  105.20    8.90
  -3 -15 -16    3.30    4.70
  -3 -15 -17    8.30    5.70
  -3 -15 -18   11.00    5.90
  -3 -15 -19    9.40    8.50
  -3 -15 -20    6.50    6.40
  -3 -15 -21   19.60   11.00
  -3 -16   6   13.70    5.90
  -3 -16   5   -4.80    6.60
  -3 -16   4   14.40    6.80
  -3 -16   3   13.70    6.90
  -3 -16   2    8.10    5.60
  -3 -16   1    1.60    5.90
  -3 -16   0    2.00    4.00
  -3 -16  -1   -0.20    5.10
  -3 -16  -2    2.60    3.40
  -3 -16  -3   -0.10    3.70
  -3 -16  -4    3.30    2.80
  -3 -16  -5   37.40    4.20
  -3 -16  -6   21.30    3.20
  -3 -16  -7   -0.30    2.20
   3  16   8  166.90    9.20
  -3 -16  -8  169.10    7.90
   3  16   9   27.90    3.30
  -3 -16  -9   32.50    3.50
   3  16  10    4.00    2.00
  -3 -16 -10   -3.40    3.50
  -3 -16 -11   31.00    6.20
  -3 -16 -12   -2.00    6.10
  -3 -16 -13   -0.70    4.40
  -3 -16 -14   -0.60    6.30
  -3 -16 -15    7.00    4.80
  -3 -16 -16    8.90    6.10
  -3 -16 -17    5.10    5.60
  -3 -16 -18   -5.00    6.50
  -3 -16 -19   35.80    7.30
  -3 -16 -20   10.80   10.00
  -3 -17   4   11.50    5.30
  -3 -17   3   28.80    7.80
  -3 -17   2   -8.70    6.20
  -3 -17   1   28.10    6.00
  -3 -17   0    7.60    4.40
  -3 -17  -1    5.70    4.20
  -3 -17  -2   -0.80    5.70
  -3 -17  -3    1.90    3.30
  -3 -17  -4   -1.10    3.00
  -3 -17  -5   -3.70    2.40
  -3 -17  -6   27.10    3.40
  -3 -17  -7   23.90    3.80
   3  17   8   26.60    3.20
  -3 -17  -8   36.20    4.40
   3  17   9    0.70    2.10
  -3 -17  -9   -1.80    2.50
  -3 -17 -10   15.70    5.40
  -3 -17 -11   25.30    7.90
  -3 -17 -12    0.20    5.10
  -3 -17 -13   14.40    6.10
  -3 -17 -14   -3.90    7.10
  -3 -17 -15    3.20    4.60
  -3 -17 -16   34.70    8.20
  -3 -17 -17    5.70    6.30
  -3 -17 -18    4.20    6.40
  -3 -17 -19   13.30    9.80
  -3 -18   2    0.50    4.20
  -3 -18   1   10.40    5.50
  -3 -18   0   63.50    8.00
  -3 -18  -1    5.90    4.70
  -3 -18  -2    6.50    4.20
  -3 -18  -3   10.90    4.40
  -3 -18  -4    5.90    3.20
  -3 -18  -5   -3.70    2.90
  -3 -18  -6    4.30    3.60
  -3 -18  -7    7.50    3.10
  -3 -18  -8   12.20    3.10
  -3 -18  -9   12.80    3.20
  -3 -18 -10   -8.80    4.40
  -3 -18 -11    4.10    6.50
  -3 -18 -12    5.50    4.50
  -3 -18 -13    8.50    7.00
  -3 -18 -14    1.30    4.90
  -3 -18 -15    5.30    7.20
  -3 -18 -16   16.80    6.10
  -3 -18 -17   37.30    9.70
  -3 -18 -18   18.80    7.50
  -3 -19   0   27.30    5.10
  -3 -19  -1   38.40    4.30
  -3 -19  -2   10.30    4.00
  -3 -19  -3    4.70    4.50
  -3 -19  -4    5.40    3.90
  -3 -19  -5   -0.40    3.00
  -3 -19  -6   12.80    3.30
  -3 -19  -7    7.60    3.60
  -3 -19  -8    2.20    4.40
  -3 -19  -9    1.30    3.20
  -3 -19 -10    6.40    5.00
  -3 -19 -11    8.20    4.70
  -3 -19 -12   20.80    6.00
  -3 -19 -13    8.40    8.40
  -3 -19 -14   14.80    6.10
  -3 -19 -15   59.20    9.90
  -3 -19 -16   19.80    6.40
  -3 -19 -17   14.10    7.30
  -3 -20  -3  170.20   11.60
  -3 -20  -4    1.90    4.40
  -3 -20  -5    9.50    3.90
  -3 -20  -6    7.20    3.50
  -3 -20  -7    2.90    3.50
  -3 -20  -8    2.00    3.10
  -3 -20  -9    3.90    3.70
  -3 -20 -10   18.60    8.00
  -3 -20 -11    5.40    5.20
  -3 -20 -12    6.20    6.90
  -3 -20 -13    5.10    9.20
  -3 -20 -14    6.00    6.30
  -3 -20 -15    8.30    8.50
  -4  19  10   14.50    7.00
  -4  19   9   20.70    7.10
  -4  19   8    6.00    4.70
  -4  19   7   27.30    7.00
  -4  19   6   11.20    5.60
  -4  19   5   11.40    6.70
  -4  19   4   46.00    8.10
   4 -18 -15    1.20    4.30
   4 -18 -14    8.30    5.10
   4 -18 -13    9.90    5.50
   4 -18 -12    1.60    4.40
   4 -18 -11    9.10    4.40
  -4  18  11    2.80    3.80
   4 -18 -10   -4.50    4.10
  -4  18  10   -0.60    3.10
  -4  18   9    5.70    4.10
  -4  18   8    5.20    4.20
  -4  18   7   -4.30    6.30
  -4  18   6   51.10    7.00
  -4  18   5   24.50    5.00
   4 -18  -2    8.10    8.20
   4 -18  -1   -2.60    8.20
   4 -18   0   -8.00    5.40
   4 -17 -17    1.30    4.00
   4 -17 -16   -0.60    6.00
   4 -17 -15    7.30    5.80
   4 -17 -14    0.80    4.40
   4 -17 -13   38.20    6.10
   4 -17 -12   26.50    4.30
  -4  17  12   26.30    5.30
   4 -17 -11    8.00    3.10
  -4  17  11    3.40    3.30
   4 -17 -10    9.30    3.70
  -4  17  10   12.10    6.00
   4 -17  -9   -4.40    3.40
  -4  17   9   -6.60    3.60
   4 -17  -8    7.10    3.60
  -4  17   8   18.90    6.30
   4 -17  -7    1.00    3.20
  -4  17   7   -2.30    5.80
   4 -17  -6   13.30    2.80
  -4  17   6   20.70    5.30
  -4  17   5  134.80    9.60
  -4  17   4   17.40    5.60
   4 -17  -3    9.40    6.10
   4 -17  -2   24.70    6.70
   4 -17  -1    2.80    5.50
   4 -17   0   12.80    8.50
   4 -17   1    1.10    5.70
   4 -17   2    4.50    5.10
   4 -16 -18    2.70    6.50
   4 -16 -17   -2.80    5.70
   4 -16 -16   -1.10    4.30
   4 -16 -15   -0.10    3.70
   4 -16 -14   10.50    3.90
   4 -16 -13   -1.90    3.10
  -4  16  13   -3.00    2.90
   4 -16 -12    5.80    2.60
  -4  16  12   15.50    4.70
   4 -16 -11   -1.00    2.40
  -4  16  11   -0.60    2.80
   4 -16 -10    0.00    2.20
  -4  16  10   10.10    3.40
   4 -16  -9   -0.60    2.20
  -4  16   9    3.50    3.40
   4 -16  -8   -4.50    3.10
  -4  16   8   -0.80    4.00
   4 -16  -7   30.80    3.90
  -4  16   7   33.40    4.90
   4 -16  -6   32.10    3.70
  -4  16   6   22.80    5.80
   4 -16  -5    6.20    2.50
  -4  16   5    5.90    4.30
   4 -16  -4    4.70    2.50
  -4  16   4    3.70    4.00
   4 -16  -3   53.20    3.90
   4 -16  -2    8.60    4.60
   4 -16  -1   -0.50    4.90
   4 -16   0   18.00    6.40
   4 -16   1   -4.50    4.70
   4 -16   2   55.50   10.50
   4 -16   3   11.20    5.70
   4 -16   4    8.30    8.20
   4 -15 -19    4.70    5.10
   4 -15 -18    7.40    4.70
   4 -15 -17   23.40    5.40
   4 -15 -16    0.80    3.90
   4 -15 -15   15.80    5.20
   4 -15 -14    2.90    4.20
   4 -15 -13   10.60    4.50
  -4  15  13    9.20    2.80
  -4  15  12    0.70    2.10
   4 -15 -11    0.30    4.10
  -4  15  11   -0.50    2.10
   4 -15 -10   35.40    4.60
  -4  15  10   33.30    3.40
   4 -15  -9   24.50    3.70
  -4  15   9   18.00    3.20
   4 -15  -8    8.60    3.10
  -4  15   8    5.10    3.00
   4 -15  -7    7.90    2.20
  -4  15   7    5.90    2.20
   4 -15  -6    0.90    2.10
  -4  15   6    4.10    2.40
   4 -15  -5    6.80    2.40
  -4  15   5    9.70    2.20
   4 -15  -4   20.60    2.00
  -4  15   4   22.60    4.40
   4 -15  -3    3.90    1.80
   4 -15  -2    7.40    2.10
   4 -15  -1   14.10    2.10
   4 -15   0    0.40    1.70
   4 -15   1   -1.80    4.00
   4 -15   2   -2.10    4.70
   4 -15   3    4.60    7.00
   4 -15   4    2.50    4.80
   4 -15   5  -11.10    7.50
   4 -15   6    7.10    5.70
   4 -14 -20    8.70    5.10
   4 -14 -19    4.50    6.10
   4 -14 -18   10.40    4.10
   4 -14 -17    2.90    2.40
   4 -14 -16   -2.50    2.30
   4 -14 -15   -0.10    2.10
   4 -14 -14    4.90    3.00
  -4  14  14    5.70    4.20
   4 -14 -13   -1.70    2.90
  -4  14  13    3.80    4.40
   4 -14 -12    0.90    3.00
  -4  14  12    3.70    2.30
   4 -14 -11   14.40    3.10
  -4  14  11   12.80    2.50
   4 -14 -10    3.20    2.40
  -4  14  10    5.30    2.60
   4 -14  -9    4.00    2.20
  -4  14   9    7.70    2.20
   4 -14  -8   21.40    2.90
  -4  14   8   27.60    2.60
   4 -14  -7   -0.80    2.50
  -4  14   7    2.30    2.10
   4 -14  -6   -0.20    2.20
  -4  14   6    4.00    2.00
   4 -14  -5   16.10    2.40
  -4  14   5   13.90    2.10
   4 -14  -4   47.90    4.00
  -4  14   4   49.20    2.90
   4 -14  -3    1.60    1.20
   4 -14  -2    3.00    1.20
   4 -14  -1    4.50    1.10
   4 -14   0   -1.10    1.10
   4 -14   1   -0.80    2.00
   4 -14   2    5.10    1.90
   4 -14   3    2.50    2.00
   4 -14   4   15.00    7.10
   4 -14   5    5.60    5.50
   4 -14   6    3.30    6.60
   4 -14   7   13.90    6.20
   4 -14   8   13.30    8.40
   4 -13 -20   -6.00    4.40
   4 -13 -19   -3.60    2.50
   4 -13 -18   30.00    4.10
   4 -13 -17    0.40    3.30
   4 -13 -16   11.80    2.70
   4 -13 -15   27.90    3.10
   4 -13 -14    1.30    2.70
  -4  13  14    0.40    4.80
   4 -13 -13   -1.20    1.80
  -4  13  13    5.60    4.20
   4 -13 -12   22.70    3.80
  -4  13  12   18.70    2.60
   4 -13 -11   -0.90    2.30
  -4  13  11    3.20    2.10
   4 -13 -10    2.30    2.60
  -4  13  10   -0.40    1.80
   4 -13  -9    7.00    2.00
  -4  13   9    6.10    1.90
   4 -13  -8    6.10    3.70
  -4  13   8    5.00    1.70
   4 -13  -7    2.00    2.50
  -4  13   7    2.70    1.60
   4 -13  -6   27.30    2.80
  -4  13   6   28.80    2.20
   4 -13  -5   29.10    2.90
  -4  13   5   34.50    2.30
   4 -13  -4    2.00    1.90
  -4  13   4    3.00    1.50
   4 -13  -3    0.80    1.30
  -4  13   3    3.50    3.10
   4 -13  -2   27.00    1.70
  -4  13   2   22.10    5.20
   4 -13  -1   14.20    1.40
   4 -13   0    4.60    1.30
   4 -13   1  144.10    6.20
   4 -13   2   -0.20    1.20
   4 -13   3   10.60    1.50
   4 -13   4    1.60    1.70
   4 -13   5    3.70    2.10
   4 -13   6    9.40    5.20
   4 -13   7    3.10    7.00
   4 -13   8    1.10    5.10
   4 -13   9   53.50    8.60
   4 -12 -21   11.10    8.80
   4 -12 -20   -1.40    6.30
   4 -12 -19    4.40    2.50
   4 -12 -18    1.80    2.70
   4 -12 -17   -0.50    2.00
   4 -12 -16    1.20    3.10
   4 -12 -15   14.80    2.90
   4 -12 -14    4.40    2.00
  -4  12  14    2.30    3.20
   4 -12 -13   -1.80    2.00
  -4  12  13   -1.30    3.00
   4 -12 -12   29.00    3.30
  -4  12  12   38.10    3.50
   4 -12 -11   32.20    3.10
  -4  12  11   33.30    2.60
   4 -12 -10   24.40    2.60
  -4  12  10   20.90    2.30
   4 -12  -9   31.60    3.70
  -4  12   9   34.40    2.80
   4 -12  -8   23.30    3.00
  -4  12   8   21.30    2.20
   4 -12  -7    1.70    2.40
  -4  12   7    4.60    2.30
   4 -12  -6    7.50    2.40
  -4  12   6   10.60    1.70
   4 -12  -5   13.30    2.20
  -4  12   5   13.00    1.80
   4 -12  -4    3.30    1.60
  -4  12   4    5.10    1.40
   4 -12  -3    1.90    1.30
  -4  12   3    0.30    1.20
   4 -12  -2   29.20    1.80
  -4  12   2   21.60    5.00
   4 -12  -1    1.30    0.90
  -4  12   1    2.50    3.60
   4 -12   0   37.80    2.20
  -4  12   0   40.80    4.80
   4 -12   1    3.60    1.10
   4 -12   2   74.50    3.20
   4 -12   3   87.30    4.10
   4 -12   4   10.30    1.50
   4 -12   5    2.10    1.50
   4 -12   6   66.40    4.90
   4 -12   7    0.80    2.20
   4 -12   8    5.10    6.50
   4 -12   9    4.50    5.00
   4 -12  10   -4.20    4.60
   4 -12  11    8.50    6.80
   4 -11 -21   18.10    7.20
   4 -11 -20   59.50    5.70
   4 -11 -19    5.30    2.60
   4 -11 -18   24.50    3.40
   4 -11 -17   -0.10    2.30
   4 -11 -16    5.00    2.30
   4 -11 -15   10.80    2.60
  -4  11  15    9.00    4.30
   4 -11 -14   29.60    3.50
  -4  11  14   21.60    3.70
   4 -11 -13   -1.80    1.80
  -4  11  13    0.60    2.70
   4 -11 -12    6.50    2.20
  -4  11  12    5.80    2.70
   4 -11 -11    5.60    1.80
  -4  11  11   -2.40    1.80
   4 -11 -10    6.80    2.00
  -4  11  10    7.60    2.30
   4 -11  -9    4.30    1.70
  -4  11   9   -0.50    1.50
   4 -11  -8    4.30    2.00
  -4  11   8    1.90    1.30
   4 -11  -7   26.60    3.20
  -4  11   7   27.60    2.00
   4 -11  -6    9.60    2.30
  -4  11   6    7.20    1.50
   4 -11  -5    1.40    1.70
  -4  11   5    0.10    1.40
   4 -11  -4   58.30    3.50
  -4  11   4   62.00    3.00
   4 -11  -3    7.20    1.40
  -4  11   3    5.60    1.30
   4 -11  -2   16.70    1.20
  -4  11   2   15.80    3.80
   4 -11  -1   21.70    1.20
  -4  11   1   14.70    5.20
   4 -11   0    8.10    1.10
  -4  11   0    5.80    3.10
   4 -11   1    0.50    0.80
  -4  11  -1    1.10    3.40
   4 -11   2   80.40    3.30
  -4  11  -2   69.90    5.80
   4 -11   3   43.50    2.20
   4 -11   4   30.70    1.90
   4 -11   5    6.70    1.50
   4 -11   6   71.30    3.60
   4 -11   7   12.60    1.90
   4 -11   8    2.80    2.10
   4 -11   9   -3.00    2.40
   4 -11  10   16.80    5.10
   4 -11  11    0.40    5.90
   4 -11  12   22.80    6.40
   4 -10 -21   16.50    5.70
   4 -10 -20   26.00    7.70
   4 -10 -19    3.70    2.90
   4 -10 -18    7.20    2.80
   4 -10 -17   15.90    2.90
   4 -10 -16  203.80    9.00
   4 -10 -15    2.30    2.60
   4 -10 -14    5.50    2.20
  -4  10  14    3.20    3.10
   4 -10 -13   49.30    3.70
  -4  10  13   43.40    6.20
   4 -10 -12   12.60    2.40
  -4  10  12    3.00    4.50
   4 -10 -11   53.40    3.60
  -4  10  11   55.70    3.70
   4 -10 -10   39.10    3.10
  -4  10  10   30.50    2.30
   4 -10  -9   53.80    3.30
  -4  10   9   49.80    3.20
   4 -10  -8   51.40    3.30
  -4  10   8   52.30    2.60
   4 -10  -7   10.90    1.80
  -4  10   7    8.50    1.30
   4 -10  -6    8.30    2.20
  -4  10   6    5.10    1.30
   4 -10  -5    3.00    1.40
  -4  10   5    2.70    1.00
   4 -10  -4    3.70    1.60
  -4  10   4    1.60    1.20
   4 -10  -3    2.00    1.20
  -4  10   3    0.90    1.00
   4 -10  -2    9.20    0.90
  -4  10   2    9.50    3.90
   4 -10  -1    4.70    1.10
  -4  10   1    5.30    3.30
   4 -10   0    1.10    0.70
  -4  10   0   -0.70    3.10
   4 -10   1    4.80    0.90
  -4  10  -1    2.50    3.20
   4 -10   2   -1.70    0.80
  -4  10  -2    1.50    2.70
   4 -10   3    0.40    0.90
  -4  10  -3   -2.80    3.20
   4 -10   4   29.80    1.80
  -4  10  -4   24.80    4.10
   4 -10   5   29.70    1.90
   4 -10   6   67.70    3.60
   4 -10   7   10.40    1.90
   4 -10   8   38.90    2.70
   4 -10   9    1.60    2.50
   4 -10  10    9.60    3.50
   4 -10  11   10.00    3.20
   4 -10  12    2.60    5.50
   4 -10  13   14.40    6.70
   4  -9 -21   -0.80    5.30
   4  -9 -20   16.50    5.90
   4  -9 -19   13.10    6.80
   4  -9 -18    9.40    4.80
   4  -9 -17   11.40    2.50
   4  -9 -16    6.90    2.40
   4  -9 -15   -0.90    1.70
  -4   9  15    2.20    5.00
   4  -9 -14    6.80    1.60
  -4   9  14    0.80    4.90
   4  -9 -13   -0.40    1.80
  -4   9  13   -0.30    3.20
   4  -9 -12   33.50    3.10
  -4   9  12   34.20    5.30
   4  -9 -11    4.70    2.60
  -4   9  11    9.50    3.90
   4  -9 -10   24.60    2.30
  -4   9  10   26.40    4.30
   4  -9  -9   -2.20    1.50
  -4   9   9    1.40    1.30
   4  -9  -8   50.50    3.00
  -4   9   8   48.10    2.60
   4  -9  -7   -1.90    1.80
  -4   9   7    0.70    1.40
   4  -9  -6    7.40    1.70
  -4   9   6    5.60    1.20
   4  -9  -5   -2.20    1.30
  -4   9   5    1.60    1.30
   4  -9  -4   62.00    3.60
  -4   9   4   64.40    2.40
   4  -9  -3   31.10    2.20
  -4   9   3   32.00    1.60
   4  -9  -2    1.60    0.90
  -4   9   2    2.30    0.90
   4  -9  -1    2.20    0.60
  -4   9   1    1.20    2.90
   4  -9   0    1.80    0.50
  -4   9   0    2.60    2.80
   4  -9   1    3.60    0.80
  -4   9  -1   -0.20    3.00
   4  -9   2   31.60    1.40
  -4   9  -2   29.20    4.20
   4  -9   3    0.40    0.80
  -4   9  -3    5.30    3.00
   4  -9   4   29.30    1.70
  -4   9  -4   22.30    3.80
   4  -9   5   -0.50    1.00
  -4   9  -5    1.70    3.10
   4  -9   6   -0.10    1.20
   4  -9   7   -1.70    1.40
   4  -9   8   -1.30    1.10
   4  -9   9    1.90    1.70
   4  -9  10    4.00    1.80
   4  -9  11    3.60    2.80
   4  -9  12   16.10    3.80
   4  -9  13   34.20    4.80
   4  -9  14    6.20    7.20
   4  -8 -21    5.00    6.30
   4  -8 -20   21.40    6.50
   4  -8 -19   -4.90    6.40
   4  -8 -18   -1.40    4.10
   4  -8 -17    2.60    1.80
   4  -8 -16   32.50    3.10
   4  -8 -15   14.50    2.40
  -4   8  15   12.30    5.90
   4  -8 -14   20.50    2.60
  -4   8  14   13.40    4.60
   4  -8 -13   82.80    4.40
  -4   8  13   99.10    8.50
   4  -8 -12   19.20    1.80
  -4   8  12   11.40    3.10
   4  -8 -11    6.10    1.50
  -4   8  11    5.20    3.80
   4  -8 -10   71.20    2.80
  -4   8  10   67.70    5.80
   4  -8  -9   78.60    4.10
  -4   8   9   83.50    5.60
   4  -8  -8   90.10    4.00
  -4   8   8   88.00    3.40
   4  -8  -7   91.40    3.90
  -4   8   7   97.10    4.10
   4  -8  -6    0.70    1.40
  -4   8   6    2.30    1.30
   4  -8  -5    8.10    1.40
  -4   8   5    7.80    1.10
   4  -8  -4    0.50    1.30
  -4   8   4    0.30    1.10
   4  -8  -3   44.00    2.50
  -4   8   3   43.70    1.90
   4  -8  -2  124.40    6.00
  -4   8   2  119.20    3.70
   4  -8  -1   68.40    2.50
  -4   8   1   62.60    5.40
   4  -8   0   40.10    5.30
  -4   8   0   41.60    3.80
   4  -8   1    6.20    0.70
  -4   8  -1    4.20    3.90
   4  -8   2    6.10    0.80
  -4   8  -2    5.10    2.90
   4  -8   3    6.30    0.80
  -4   8  -3    2.10    2.90
   4  -8   4    2.00    0.90
  -4   8  -4    6.20    3.30
   4  -8   5   85.90    3.30
  -4   8  -5   88.70    6.30
   4  -8   6   33.70    2.00
   4  -8   7   -2.20    1.20
   4  -8   8    1.00    1.60
   4  -8   9   16.10    2.60
  -4   8  -9   12.80    3.00
   4  -8  10   36.00    4.80
  -4   8 -10   32.40    4.60
   4  -8  11    5.10    2.20
  -4   8 -11    6.20    3.70
   4  -8  12    3.80    4.10
  -4   8 -12    9.10    3.20
   4  -8  13   -3.20    4.20
  -4   8 -13    5.70    3.50
   4  -8  14    8.40    5.20
  -4   8 -14   15.30    4.10
   4  -8  15   14.80    6.20
   4  -7 -21   -2.90    6.00
   4  -7 -20    7.90    6.00
   4  -7 -19   10.60    6.80
   4  -7 -18    7.10    4.50
   4  -7 -17   -0.20    2.10
   4  -7 -16   16.20    2.80
   4  -7 -15   19.10    2.80
  -4   7  15   21.90    6.10
   4  -7 -14   31.30    3.00
  -4   7  14   29.50    4.20
   4  -7 -13  180.20    8.20
  -4   7  13  197.20   15.40
   4  -7 -12  279.50   10.80
  -4   7  12  268.40   18.80
   4  -7 -11   39.00    2.80
  -4   7  11   41.20    4.90
   4  -7 -10    1.20    1.70
  -4   7  10    3.10    2.60
   4  -7  -9  294.00    7.80
  -4   7   9  275.70   15.10
   4  -7  -8    8.80    1.40
  -4   7   8    4.40    1.60
   4  -7  -7   44.00    2.60
  -4   7   7   44.00    2.80
   4  -7  -6  333.80   10.30
  -4   7   6  345.00    9.90
   4  -7  -5   -1.30    1.00
  -4   7   5    0.20    1.40
   4  -7  -4   85.10    3.50
  -4   7   4   91.20    3.30
   4  -7  -3   99.30    3.80
  -4   7   3   89.50    2.70
   4  -7  -2   32.10    1.70
  -4   7   2   32.70    1.60
  -4   7   1    5.80    1.80
   4  -7   0  183.50   10.00
  -4   7   0  177.70    9.50
   4  -7   1   74.50    6.70
  -4   7  -1   79.00    5.20
   4  -7   2   19.70    1.00
  -4   7  -2   25.80    3.50
   4  -7   3   22.30    1.10
  -4   7  -3   26.70    3.20
   4  -7   4    5.40    0.90
  -4   7  -4   11.20    2.70
   4  -7   5    1.40    0.90
  -4   7  -5    0.10    2.30
   4  -7   6   14.90    1.50
  -4   7  -6   14.80    1.90
   4  -7   7   36.70    2.80
  -4   7  -7   34.90    3.00
   4  -7   8   13.30    2.20
  -4   7  -8   12.30    1.90
   4  -7   9    6.30    2.40
  -4   7  -9    5.50    2.10
   4  -7  10   18.50    2.60
  -4   7 -10   18.40    3.20
   4  -7  11   31.20    4.70
  -4   7 -11   31.80    3.50
   4  -7  12    2.10    3.10
  -4   7 -12    4.10    2.30
   4  -7  13   12.10    4.10
  -4   7 -13   12.40    3.20
  -4   7 -14    0.20    3.10
  -4   7 -15   19.80    6.10
  -4   7 -16   -0.80    5.00
   4  -6 -21   -2.20    5.90
   4  -6 -20    7.40    5.10
   4  -6 -19    6.40    6.40
   4  -6 -18    3.60    2.30
   4  -6 -17   -1.10    2.10
   4  -6 -16    3.30    2.70
   4  -6 -15   -1.60    2.30
   4  -6 -14    3.80    2.00
  -4   6  14    9.50    4.50
   4  -6 -13    7.50    2.10
  -4   6  13    7.60    3.20
   4  -6 -12    3.90    2.30
  -4   6  12    1.50    2.50
   4  -6 -11   86.30    3.90
  -4   6  11   81.60    7.00
   4  -6 -10  234.70    7.70
  -4   6  10  236.30   11.60
   4  -6  -9  285.10    9.50
  -4   6   9  275.90   12.40
   4  -6  -8  283.00    9.10
  -4   6   8  275.60   12.30
   4  -6  -7  144.50    4.30
  -4   6   7  146.00    5.40
   4  -6  -6   38.90    2.10
  -4   6   6   35.70    2.30
   4  -6  -5    5.80    1.20
  -4   6   5    3.20    1.60
   4  -6  -4   84.50    3.80
  -4   6   4   78.90    3.10
   4  -6  -3  265.20    8.70
  -4   6   3  272.30    8.00
   4  -6  -2 1111.90   35.20
  -4   6   2 1146.30   25.70
  -4   6   1   -0.70    1.80
   4  -6   0   37.60    4.40
  -4   6   0   33.40    2.20
   4  -6   1  132.40    7.00
  -4   6  -1  136.00    7.60
   4  -6   2   10.20    2.80
  -4   6  -2    4.50    3.50
   4  -6   3   67.00    2.30
  -4   6  -3   70.50    4.70
   4  -6   4   50.50    2.00
  -4   6  -4   58.30    5.60
   4  -6   5   21.20    1.90
  -4   6  -5   21.10    1.90
   4  -6   6    2.90    1.20
  -4   6  -6   -0.70    1.60
   4  -6   7    5.40    1.60
  -4   6  -7    7.30    2.10
   4  -6   8   58.70    3.80
  -4   6  -8   61.20    3.80
   4  -6   9    4.00    1.90
  -4   6  -9   -3.70    2.70
   4  -6  10    5.50    2.40
  -4   6 -10   12.30    2.40
   4  -6  11    8.10    3.60
  -4   6 -11   11.00    2.70
   4  -6  12    9.00    3.30
  -4   6 -12   11.30    3.20
   4  -6  13   -1.50    4.70
  -4   6 -13    1.60    2.70
   4  -6  14   19.90    5.50
  -4   6 -14   18.50    5.50
  -4   6 -15    1.30    3.40
  -4   6 -16    8.10    4.10
   4  -5 -21    8.50    6.70
   4  -5 -20    0.00    6.10
   4  -5 -19    2.50    4.60
   4  -5 -18    2.20    2.90
   4  -5 -17    3.30    2.50
   4  -5 -16    7.30    2.10
   4  -5 -15    2.10    2.50
   4  -5 -14    7.30    2.60
  -4   5  14   -0.30    3.30
   4  -5 -13    6.60    4.80
  -4   5  13   16.10    4.10
   4  -5 -12   81.70    4.70
  -4   5  12   92.00    7.70
   4  -5 -11  207.80    8.40
  -4   5  11  202.60   13.30
   4  -5 -10    8.30    2.10
  -4   5  10    3.80    2.20
   4  -5  -9    0.70    2.00
  -4   5   9    1.30    2.00
   4  -5  -8    6.00    1.80
  -4   5   8    8.10    2.00
   4  -5  -7   29.50    2.40
  -4   5   7   26.90    3.50
   4  -5  -6  115.30    3.70
  -4   5   6  121.90    4.90
   4  -5  -5   11.00    1.30
  -4   5   5    8.40    1.80
   4  -5  -4    5.10    1.20
  -4   5   4    1.70    1.60
   4  -5  -3   61.20    2.90
  -4   5   3   61.10    2.50
   4  -5  -2    3.40    0.90
  -4   5   2    1.80    0.80
   4  -5  -1  169.80    8.10
  -4   5   1  175.90    5.10
  -4   5   0   48.10    2.30
   4  -5   1   23.60    3.70
  -4   5  -1   12.40    2.20
   4  -5   2  107.70    6.40
  -4   5  -2  123.40    6.90
   4  -5   3  251.70    7.00
  -4   5  -3  237.20   12.20
   4  -5   4   79.80    3.80
  -4   5  -4   87.10    3.30
   4  -5   5    0.40    1.10
  -4   5  -5   -2.70    1.20
   4  -5   6   -0.60    1.40
  -4   5  -6    3.40    1.60
   4  -5   7    4.60    1.80
  -4   5  -7    4.10    2.30
   4  -5   8    5.40    1.90
  -4   5  -8    4.60    1.90
   4  -5   9    1.40    2.60
  -4   5  -9    1.40    2.70
   4  -5  10   12.80    2.80
  -4   5 -10   12.20    3.50
   4  -5  11   -4.00    2.10
  -4   5 -11    0.70    2.30
   4  -5  12   80.10    7.20
  -4   5 -12   89.50    7.20
   4  -5  13    8.40    3.20
  -4   5 -13    4.30    3.90
   4  -5  14   -5.60    5.50
  -4   5 -14    3.80    3.20
  -4   5 -15   12.10    3.60
  -4   5 -16    1.40    6.10
  -4   5 -17    5.20    4.10
   4  -4 -21    7.50    6.40
   4  -4 -20    8.80    8.20
   4  -4 -19    5.40    5.10
   4  -4 -18    2.60    6.30
   4  -4 -17    7.50    4.00
   4  -4 -16   10.20    6.10
   4  -4 -15   -0.50    3.10
   4  -4 -14   -1.50    2.10
  -4   4  14    0.40    4.80
   4  -4 -13   14.60    2.70
  -4   4  13   16.50    3.40
   4  -4 -12    8.40    2.60
  -4   4  12    8.30    4.00
   4  -4 -11    9.10    2.50
  -4   4  11    6.30    2.90
   4  -4 -10   11.30    1.90
  -4   4  10   13.70    3.70
   4  -4  -9   32.30    2.30
  -4   4   9   27.80    4.20
   4  -4  -8  421.70   13.10
  -4   4   8  408.80   18.00
   4  -4  -7   77.50    3.80
  -4   4   7   80.90    4.90
   4  -4  -6  125.40    4.60
  -4   4   6  131.60   10.20
   4  -4  -5   39.20    2.90
  -4   4   5   34.90    2.50
   4  -4  -4   -0.80    1.10
  -4   4   4   -1.80    1.00
   4  -4  -3   17.00    1.20
  -4   4   3   20.90    1.60
   4  -4  -2   52.80    2.30
  -4   4   2   52.60    2.20
   4  -4  -1   23.10    3.20
  -4   4   1   17.80    0.80
   4  -4   0    0.80    2.30
  -4   4   0    3.90    1.30
   4  -4   1  286.90   13.50
  -4   4  -1  308.10    8.40
   4  -4   2  262.50   12.50
  -4   4  -2  235.60    8.20
   4  -4   3  580.30   17.60
  -4   4  -3  589.30   17.80
   4  -4   4  275.90   10.10
  -4   4  -4  292.30    8.90
   4  -4   5    8.20    1.40
  -4   4  -5    8.10    1.50
   4  -4   6  119.00    5.10
  -4   4  -6  118.30    4.20
   4  -4   7   42.40    2.90
  -4   4  -7   43.00    3.60
   4  -4   8   46.70    2.90
  -4   4  -8   52.30    4.10
   4  -4   9    2.40    1.90
  -4   4  -9    9.70    3.00
   4  -4  10    6.30    2.60
  -4   4 -10    5.50    2.30
   4  -4  11  262.20   15.70
  -4   4 -11  284.30   13.80
   4  -4  12   25.80    4.90
  -4   4 -12   23.80    3.80
   4  -4  13    2.10    4.40
  -4   4 -13   -4.40    3.80
   4  -4  14   36.50    4.60
  -4   4 -14   37.50    4.90
  -4   4 -15    6.10    4.60
  -4   4 -16    5.40    4.00
  -4   4 -17   -2.70    4.30
  -4   4 -18    5.60    5.90
   4  -3 -21   14.80    6.70
   4  -3 -20    3.30    7.80
   4  -3 -19   10.20    5.80
   4  -3 -18   -8.90    6.50
   4  -3 -17   23.70    5.60
   4  -3 -16   36.10    6.30
   4  -3 -15    6.10    3.70
   4  -3 -14    1.00    3.30
  -4   3  14    2.70    3.60
   4  -3 -13   31.50    5.80
  -4   3  13   18.80    3.50
   4  -3 -12    6.60    3.50
  -4   3  12    1.90    3.90
   4  -3 -11   23.60    4.30
  -4   3  11   25.60    4.60
   4  -3 -10   38.10    2.60
  -4   3  10   31.40    4.00
   4  -3  -9    3.70    1.70
  -4   3   9    0.60    3.10
   4  -3  -8    2.80    1.80
  -4   3   8    7.60    2.40
   4  -3  -7   71.60    4.20
  -4   3   7   70.20    4.10
   4  -3  -6  546.10   15.50
  -4   3   6  543.80   38.20
   4  -3  -5  247.90    7.30
  -4   3   5  241.70   10.70
   4  -3  -4   54.20    3.10
  -4   3   4   60.70    3.00
   4  -3  -3    2.40    1.10
  -4   3   3    0.10    1.00
   4  -3  -2   47.50    2.10
  -4   3   2   50.30    2.40
   4  -3  -1   99.70    3.90
  -4   3   1  110.30    2.90
   4  -3   0   24.00    3.40
  -4   3   0   17.70    0.70
   4  -3   1   40.10    3.40
  -4   3  -1   43.90    1.20
   4  -3   2   27.30    3.80
  -4   3  -2   19.00    1.00
   4  -3   3   31.00    1.70
  -4   3  -3   26.60    1.40
   4  -3   4   82.90    3.50
  -4   3  -4   89.20    3.50
   4  -3   5    1.20    1.20
  -4   3  -5    3.80    1.30
   4  -3   6   91.70    3.90
  -4   3  -6   99.60    3.80
   4  -3   7   78.40    4.10
  -4   3  -7   93.30    6.30
   4  -3   8   16.40    2.10
  -4   3  -8   21.60    2.50
   4  -3   9  100.90    6.40
  -4   3  -9  102.80    6.80
   4  -3  10   48.10    5.50
  -4   3 -10   56.80    5.30
   4  -3  11   84.30    7.70
  -4   3 -11   94.70    6.40
   4  -3  12  289.60   16.40
  -4   3 -12  295.70   17.40
   4  -3  13   40.40    5.60
  -4   3 -13   37.40    6.00
   4  -3  14    2.00    3.70
  -4   3 -14   -0.90    2.20
   4  -3  15   -0.90    3.90
  -4   3 -15    1.30    2.90
  -4   3 -16    4.50    5.00
  -4   3 -17   36.40    7.30
  -4   3 -18   21.40    5.50
   4  -2 -21   16.80    9.40
   4  -2 -20    3.20    6.00
   4  -2 -19   -3.20    4.70
   4  -2 -18    8.80    5.10
   4  -2 -17   28.60    7.90
   4  -2 -16    3.50    4.20
   4  -2 -15   -5.00    4.10
   4  -2 -14    6.40    5.00
   4  -2 -13   25.90    5.60
  -4   2  13   33.90    5.20
   4  -2 -12   -2.10    3.50
  -4   2  12   -3.40    2.70
   4  -2 -11    4.80    2.90
  -4   2  11    0.10    2.90
   4  -2 -10    3.20    2.60
  -4   2  10    6.40    2.50
   4  -2  -9   20.60    3.30
  -4   2   9   12.80    2.90
   4  -2  -8   22.20    2.60
  -4   2   8   22.50    3.10
   4  -2  -7   97.40    4.90
  -4   2   7  110.20    6.30
   4  -2  -6   40.00    2.90
  -4   2   6   40.90    3.20
   4  -2  -5   15.20    2.10
  -4   2   5   10.70    2.60
   4  -2  -4  116.70    4.40
  -4   2   4  110.40    5.30
   4  -2  -3   11.20    1.80
  -4   2   3    9.00    1.50
   4  -2  -2  290.00    8.90
  -4   2   2  288.50   11.20
   4  -2  -1    9.10    1.90
  -4   2   1    3.60    0.80
   4  -2   0  193.90    5.90
  -4   2   0  184.40    4.70
   4  -2   1  321.30   10.30
  -4   2  -1  333.10    7.50
   4  -2   2  123.00    4.80
  -4   2  -2  122.80    3.20
   4  -2   3  128.10    4.60
  -4   2  -3  136.00    3.20
   4  -2   4    3.80    1.30
  -4   2  -4    3.70    1.20
   4  -2   5   13.10    1.60
  -4   2  -5   17.80    1.70
   4  -2   6  496.90   15.00
  -4   2  -6  506.70   14.50
   4  -2   7  115.10    4.70
  -4   2  -7  108.50    4.30
   4  -2   8   11.50    1.70
  -4   2  -8    6.10    2.70
   4  -2   9    5.50    3.00
  -4   2  -9    1.30    2.80
   4  -2  10    3.90    2.50
  -4   2 -10    5.40    2.60
   4  -2  11   71.60    6.40
  -4   2 -11   75.10    5.30
   4  -2  12    5.20    4.30
  -4   2 -12    3.80    2.30
   4  -2  13   52.00    5.80
  -4   2 -13   61.60    6.10
   4  -2  14   12.60    3.90
  -4   2 -14    9.80    4.50
   4  -2  15    0.80    4.10
  -4   2 -15    0.30    3.90
  -4   2 -16    3.50    4.00
  -4   2 -17    2.60    3.50
  -4   2 -18    9.00    4.40
  -4   2 -19    2.60    4.10
   4  -1 -20    4.90    5.50
   4  -1 -19    3.90    7.80
   4  -1 -18    0.50    4.20
   4  -1 -17    1.80    5.20
   4  -1 -16   -5.50    6.80
   4  -1 -15   14.00    4.70
   4  -1 -14   27.70    5.60
   4  -1 -13   -1.90    3.60
  -4   1  13   -2.30    3.20
   4  -1 -12   -7.00    4.30
  -4   1  12   -3.20    2.90
   4  -1 -11   22.10    5.10
  -4   1  11    8.50    3.60
   4  -1 -10    5.40    4.80
  -4   1  10   -2.30    2.30
   4  -1  -9    3.90    2.60
  -4   1   9    2.80    2.50
   4  -1  -8  124.00    8.50
  -4   1   8  129.90    7.10
   4  -1  -7   20.10    3.70
  -4   1   7   22.30    3.50
   4  -1  -6  208.30   12.10
  -4   1   6  215.10   11.00
   4  -1  -5  107.50    5.00
  -4   1   5  101.40    5.70
   4  -1  -4  478.00   16.90
  -4   1   4  502.10   21.20
   4  -1  -3   37.10    2.30
  -4   1   3   40.60    2.70
   4  -1  -2   28.90    1.80
  -4   1   2   29.00    1.50
   4  -1  -1   92.60    5.30
  -4   1   1   90.50    2.70
   4  -1   0   61.50    3.30
  -4   1   0   64.40    2.20
   4  -1   1   26.00    2.20
  -4   1  -1   21.40    1.40
   4  -1   2    2.50    1.00
  -4   1  -2    1.30    0.90
   4  -1   3   14.60    6.60
  -4   1  -3    6.40    1.20
   4  -1   4    1.50    1.10
  -4   1  -4    1.60    1.40
   4  -1   5   24.30    1.90
  -4   1  -5   24.20    1.70
   4  -1   6   -0.90    1.10
  -4   1  -6    1.30    1.60
   4  -1   7  166.30    6.50
  -4   1  -7  163.30    6.40
   4  -1   8  121.50    4.90
  -4   1  -8  124.60    5.00
   4  -1   9   10.00    3.40
  -4   1  -9   12.10    2.50
  -4   1 -10   -0.60    2.40
   4  -1  11   10.50    2.80
  -4   1 -11   23.10    4.30
   4  -1  12   13.00    3.40
  -4   1 -12   10.10    3.20
   4  -1  13   12.40    3.70
  -4   1 -13   16.40    3.60
   4  -1  14    2.90    2.70
  -4   1 -14    3.90    3.20
   4  -1  15    4.20    3.50
  -4   1 -15    0.70    3.00
  -4   1 -16    7.80    4.00
  -4   1 -17    1.60    4.10
  -4   1 -18    6.50    4.70
  -4   1 -19    6.10    4.80
  -4   1 -20   -3.80    6.20
   4   0 -20   -1.80    6.00
   4   0 -19    2.10    5.70
   4   0 -18   11.10    7.50
   4   0 -17    0.20    4.80
   4   0 -16    6.00    4.60
   4   0 -15    9.00    6.10
   4   0 -14    6.80    5.70
   4   0 -13  179.80   12.50
  -4   0  13  167.40   17.80
   4   0 -12   65.30    7.00
  -4   0  12   53.60    6.50
   4   0 -11   13.20    4.70
  -4   0  11    7.60    2.80
   4   0 -10    1.30    4.50
  -4   0  10    5.90    3.90
   4   0  -9    8.00    2.60
  -4   0   9    3.10    2.20
   4   0  -8   52.10    4.50
  -4   0   8   44.70    4.40
   4   0  -7  205.10   13.60
  -4   0   7  212.10   10.70
   4   0  -6    2.50    2.60
  -4   0   6    2.20    2.50
   4   0  -5   51.70    4.10
  -4   0   5   45.70    4.40
   4   0  -4    4.80    1.90
  -4   0   4    4.10    2.90
   4   0  -3    4.90    1.80
  -4   0   3    0.60    2.40
   4   0  -2  305.00   13.70
  -4   0   2  311.80   10.60
   4   0  -1    9.50    4.20
  -4   0   1    9.70    1.50
   4   0   0  379.10   10.60
  -4   0   0  371.70   11.70
   4   0   1  124.20    4.00
  -4   0  -1  111.90    4.20
   4   0   2    0.90    1.00
  -4   0  -2    0.50    1.00
   4   0   3   72.60    2.90
  -4   0  -3   70.70    2.30
   4   0   4   93.90    3.70
  -4   0  -4  103.50    3.10
   4   0   5  119.80    3.90
  -4   0  -5  122.00    3.70
   4   0   6  762.00   26.90
  -4   0  -6  774.60   19.20
   4   0   7   23.90    2.00
  -4   0  -7   28.00    1.90
   4   0   8   -1.00    1.10
  -4   0  -8    0.60    1.70
   4   0   9    9.50    1.30
  -4   0  -9   10.10    1.80
   4   0  10    3.30    3.30
  -4   0 -10    3.60    2.50
   4   0  11  148.80    8.10
  -4   0 -11  138.40    8.60
   4   0  12   47.90    5.30
  -4   0 -12   48.20    5.00
   4   0  13    6.70    3.30
  -4   0 -13    5.10    3.40
   4   0  14  294.70   21.60
  -4   0 -14  314.50   17.60
   4   0  15    2.30    3.30
  -4   0 -15    3.60    4.30
  -4   0 -16   35.30    6.50
  -4   0 -17   14.00    4.60
  -4   0 -18   -4.10    3.40
  -4   0 -19    6.80    4.30
  -4   0 -20    9.10    4.50
   4   1 -19    4.00    5.10
   4   1 -18    0.10    6.10
   4   1 -17    3.10    6.40
   4   1 -16    1.00    4.20
   4   1 -15    6.00    5.10
   4   1 -14   34.60    5.90
   4   1 -13    4.10    4.90
   4   1 -12   19.10    4.60
  -4  -1  12   17.00    4.30
   4   1 -11   13.50    4.20
  -4  -1  11   14.70    4.40
   4   1 -10    7.40    3.60
  -4  -1  10    3.10    3.10
   4   1  -9   19.60    4.50
  -4  -1   9    9.60    2.70
   4   1  -8    0.10    2.80
  -4  -1   8   -0.90    2.70
   4   1  -7   10.80    3.20
  -4  -1   7   14.80    4.00
   4   1  -6    2.30    3.00
  -4  -1   6    0.70    2.40
   4   1  -5    3.90    2.60
  -4  -1   5    6.00    3.40
   4   1  -4   45.90    4.20
  -4  -1   4   46.30    3.40
   4   1  -3   25.20    3.70
  -4  -1   3   26.90    2.80
  -4  -1   2   -2.00    1.40
   4   1  -1   53.60    4.70
  -4  -1   1   54.20    2.70
   4   1   0  127.80    4.80
  -4  -1   0  123.20    6.40
   4   1   1  175.10    5.90
  -4  -1  -1  164.80    6.40
   4   1   2    5.40    1.30
  -4  -1  -2    2.90    1.40
   4   1   3   53.90    2.20
  -4  -1  -3   52.70    2.10
   4   1   4    7.40    1.30
  -4  -1  -4    8.80    1.00
   4   1   5  501.00   18.30
  -4  -1  -5  507.40   12.90
   4   1   6   91.80    3.70
  -4  -1  -6   97.40    3.10
   4   1   7  657.30   22.50
  -4  -1  -7  638.00   31.40
   4   1   8   13.50    1.70
  -4  -1  -8    9.40    1.50
   4   1   9   14.90    1.50
  -4  -1  -9   17.10    1.90
   4   1  10    8.00    2.70
  -4  -1 -10    8.10    1.90
   4   1  11   47.70    5.30
  -4  -1 -11   40.40    4.60
   4   1  12    2.00    2.70
  -4  -1 -12    9.70    2.80
   4   1  13    2.20    4.40
  -4  -1 -13    6.90    4.50
   4   1  14    5.50    3.50
  -4  -1 -14    6.60    3.30
   4   1  15    1.60    3.60
  -4  -1 -15   -2.00    3.90
  -4  -1 -16   23.80    6.10
  -4  -1 -17    6.00    6.20
  -4  -1 -18    2.40    3.80
  -4  -1 -19   22.10    5.20
  -4  -1 -20   -0.90    4.20
  -4  -1 -21   -0.50    5.50
   4   2 -19   15.00    8.90
   4   2 -18   22.30    6.20
   4   2 -17   30.60    7.10
   4   2 -16    4.50    4.60
   4   2 -15   58.10    9.70
   4   2 -13   76.00    8.10
   4   2 -12   63.40    8.40
  -4  -2  12   64.50    7.10
   4   2 -11   59.30    8.10
  -4  -2  11   35.00    5.90
   4   2 -10   22.80    4.70
  -4  -2  10    7.30    4.10
   4   2  -9   38.10    7.40
  -4  -2   9    7.30    4.60
   4   2  -8    9.40    3.30
  -4  -2   8    3.80    2.90
   4   2  -7  154.50    9.00
  -4  -2   7  149.50    7.70
   4   2  -6   15.00    3.20
  -4  -2   6    8.40    2.50
   4   2  -5  113.90    7.10
  -4  -2   5  111.20    6.30
   4   2  -4    2.90    2.30
  -4  -2   4    3.70    3.20
  -4  -2   3   48.50    2.80
  -4  -2   2  594.40   15.80
  -4  -2   1   72.40    3.60
   4   2   0  217.20    7.70
  -4  -2   0  183.40    8.40
   4   2   1  501.70   13.70
  -4  -2  -1  509.40   19.70
   4   2   2   69.40    2.90
  -4  -2  -2   69.20    3.80
   4   2   3  648.60   13.70
  -4  -2  -3  639.70   21.60
   4   2   4  145.80    4.40
  -4  -2  -4  154.70    4.20
   4   2   5    0.80    0.90
  -4  -2  -5    4.30    2.10
   4   2   6 1100.60   38.30
  -4  -2  -6 1104.40   26.50
   4   2   7  270.40    7.50
  -4  -2  -7  272.60    6.90
   4   2   8    1.40    1.10
  -4  -2  -8    1.70    1.20
   4   2   9  148.00    5.60
  -4  -2  -9  146.40    4.30
   4   2  10   43.80    4.70
  -4  -2 -10   46.50    2.20
   4   2  11    3.90    2.50
  -4  -2 -11    6.70    1.50
   4   2  12   22.10    3.80
  -4  -2 -12   27.00    2.50
   4   2  13    3.70    3.60
  -4  -2 -13   -0.40    3.20
   4   2  14   21.10    5.70
  -4  -2 -14   40.60    6.10
   4   2  15    9.20    3.90
  -4  -2 -15   -0.10    3.10
  -4  -2 -16    6.10    3.60
  -4  -2 -17    9.10    5.80
  -4  -2 -18    5.70    4.30
  -4  -2 -19   19.90    5.20
  -4  -2 -20    2.10    4.80
  -4  -2 -21   -4.90    4.90
   4   3 -18    1.10    7.70
   4   3 -17   12.90    5.30
   4   3 -16   26.10    6.70
   4   3 -15   15.50    4.70
   4   3 -14   -8.10    4.00
   4   3 -13    1.70    4.60
   4   3 -12   19.40    4.40
   4   3 -11   21.00    4.20
  -4  -3  11   26.70    5.70
   4   3 -10   47.00    6.00
  -4  -3  10   37.40    5.40
   4   3  -9   32.30    4.00
  -4  -3   9   19.60    5.10
   4   3  -8   55.20    6.50
  -4  -3   8   55.90    5.10
   4   3  -7   46.70    4.20
  -4  -3   7   43.30    4.70
   4   3  -6   43.70    4.60
  -4  -3   6   47.40    4.10
   4   3  -5   21.20    3.30
  -4  -3   5   21.10    3.50
  -4  -3   4    8.50    2.40
  -4  -3   3  246.20   10.10
  -4  -3   2   31.30    2.20
  -4  -3   1  150.70    5.80
   4   3   0  287.10   12.60
  -4  -3   0  267.90   11.50
   4   3   1   32.50    3.40
  -4  -3  -1   36.90    4.40
   4   3   2    1.50    1.30
  -4  -3  -2    1.30    2.90
   4   3   3  113.10    4.20
  -4  -3  -3  104.80    5.80
   4   3   4   65.00    2.30
  -4  -3  -4   64.60    3.00
   4   3   5   18.80    1.30
  -4  -3  -5   21.10    1.20
   4   3   6  100.80    3.70
  -4  -3  -6  108.50    4.60
   4   3   7  177.60    9.00
  -4  -3  -7  168.60    4.60
   4   3   8    9.20    2.80
  -4  -3  -8    7.70    1.50
   4   3   9   76.90    3.50
  -4  -3  -9   84.60    2.90
   4   3  10    8.60    1.30
  -4  -3 -10   10.00    1.30
   4   3  11  130.20    8.40
  -4  -3 -11  127.30    4.00
   4   3  12   20.00    3.40
  -4  -3 -12   28.50    2.00
   4   3  13   29.10    4.80
  -4  -3 -13   35.30    2.30
   4   3  14   17.10    4.50
  -4  -3 -14   21.10    2.70
   4   3  15   24.90    5.80
  -4  -3 -15   26.40    2.70
  -4  -3 -16   -0.60    2.20
  -4  -3 -17   16.30    3.30
  -4  -3 -18  145.30    7.60
  -4  -3 -19   -1.40    2.80
  -4  -3 -20    5.30    2.70
  -4  -3 -21   -0.30    6.60
   4   4 -18    1.30    6.20
   4   4 -17    6.80    5.00
   4   4 -16   31.80    9.00
   4   4 -15   31.30    7.00
   4   4 -14    0.10    7.10
   4   4 -13   27.00    6.80
   4   4 -12   94.00    9.40
   4   4 -11   66.50    6.40
   4   4 -10    3.00    3.70
  -4  -4  10    4.10    4.40
   4   4  -9   34.90    6.00
  -4  -4   9   40.70    5.80
   4   4  -8   90.40    6.00
  -4  -4   8   96.40    6.40
   4   4  -7   14.10    3.80
  -4  -4   7    7.10    3.20
   4   4  -6   26.80    4.00
  -4  -4   6   27.40    3.60
  -4  -4   5   17.70    2.50
  -4  -4   4   19.80    3.10
  -4  -4   3  159.70    6.20
  -4  -4   2  582.10   17.70
   4   4  -1   10.30    2.60
  -4  -4   1    9.60    1.80
   4   4   0   12.70    3.10
  -4  -4   0   18.00    3.60
   4   4   1  123.30    5.40
  -4  -4  -1  118.20    7.10
   4   4   2   12.40    2.70
  -4  -4  -2   10.00    3.50
   4   4   3   42.90    2.80
  -4  -4  -3   38.80    3.10
   4   4   4  152.90    5.60
  -4  -4  -4  139.20    6.70
   4   4   5    3.00    1.30
  -4  -4  -5    2.00    2.40
   4   4   6   30.60    1.70
  -4  -4  -6   34.60    2.30
   4   4   7   46.60    5.50
  -4  -4  -7   51.90    2.80
   4   4   8   -0.20    2.60
  -4  -4  -8    0.10    1.70
   4   4   9    8.00    3.50
  -4  -4  -9    3.90    1.30
   4   4  10   46.10    2.00
  -4  -4 -10   42.90    2.00
   4   4  11   30.90    1.80
  -4  -4 -11   31.60    1.90
   4   4  12   50.00    6.20
  -4  -4 -12   57.40    2.60
   4   4  13    2.50    3.50
  -4  -4 -13    0.70    1.60
   4   4  14  145.60   12.10
  -4  -4 -14  150.70    4.60
   4   4  15    5.60    5.30
  -4  -4 -15    6.40    1.60
  -4  -4 -16    0.10    1.20
  -4  -4 -17   98.40    6.40
  -4  -4 -18   -0.40    2.20
  -4  -4 -19    2.40    2.00
  -4  -4 -20   24.60    4.00
  -4  -4 -21    7.70    5.30
  -4  -4 -22   15.70    6.60
   4   5 -17   17.60    7.60
   4   5 -16    7.20    6.10
   4   5 -15   -3.10    5.50
   4   5 -14   64.20    8.00
   4   5 -13   13.00    5.00
   4   5 -12   35.60    4.40
   4   5 -11   46.00    7.00
   4   5 -10    8.70    4.10
  -4  -5  10    2.50    5.30
   4   5  -9  156.60    9.60
  -4  -5   9  169.00   10.80
   4   5  -8   25.70    4.00
  -4  -5   8   38.70    4.40
   4   5  -7    1.10    3.50
  -4  -5   7   -0.50    2.20
  -4  -5   6  410.00   12.60
  -4  -5   5   48.90    3.40
  -4  -5   4    8.80    2.30
  -4  -5   3  657.70   18.10
  -4  -5   2   36.40    2.80
   4   5  -1   -1.90    2.70
  -4  -5   1    1.50    1.80
   4   5   0  199.50    9.50
  -4  -5   0  179.80    8.90
   4   5   1    8.50    2.70
  -4  -5  -1    3.30    3.70
   4   5   2   59.50    5.00
  -4  -5  -2   71.80    4.80
   4   5   3    3.30    2.40
  -4  -5  -3    1.30    2.60
   4   5   4    2.40    1.90
  -4  -5  -4   12.90    3.80
   4   5   5    7.90    2.00
  -4  -5  -5   10.60    3.70
   4   5   6    1.80    1.00
  -4  -5  -6    0.70    2.70
   4   5   7   23.80    2.20
  -4  -5  -7   22.80    4.00
   4   5   8   -1.20    2.50
  -4  -5  -8   11.70    3.80
   4   5   9  103.70    5.90
  -4  -5  -9  110.00    4.20
   4   5  10  864.90   46.70
  -4  -5 -10  853.10   25.50
   4   5  11   24.90    3.60
  -4  -5 -11   21.90    1.40
   4   5  12    1.80    0.60
  -4  -5 -12    4.00    1.20
   4   5  13    0.10    3.30
  -4  -5 -13    1.10    1.20
   4   5  14   76.70    9.60
  -4  -5 -14   71.20    2.90
   4   5  15   14.00    4.70
  -4  -5 -15   10.50    1.40
  -4  -5 -16   14.70    1.80
  -4  -5 -17    8.70    1.60
  -4  -5 -18   43.40    2.70
  -4  -5 -19    7.20    2.50
  -4  -5 -20   11.40    5.30
  -4  -5 -21    1.80    4.50
  -4  -5 -22    5.00    7.80
   4   6 -17   -0.80    7.80
   4   6 -16   24.30    8.80
   4   6 -15   11.10    5.50
   4   6 -14    1.30    5.00
   4   6 -13   -4.30    5.50
   4   6 -12   -4.20    5.90
   4   6 -11   49.60    6.40
   4   6 -10   40.90    5.70
   4   6  -9  138.90    9.50
  -4  -6   9  137.40    7.30
  -4  -6   8   12.30    3.10
  -4  -6   7    2.00    2.20
  -4  -6   6   43.70    3.50
  -4  -6   5  547.30   17.60
  -4  -6   4   69.10    4.10
  -4  -6   3   32.60    3.00
  -4  -6   2  114.70    4.90
   4   6  -1  348.40   12.70
  -4  -6   1  331.30   10.50
   4   6   0  199.40    9.40
  -4  -6   0  214.10   11.30
   4   6   1  254.60   11.10
  -4  -6  -1  267.90   12.70
   4   6   2    5.20    3.90
  -4  -6  -2   -5.10    3.20
   4   6   3    1.10    2.00
  -4  -6  -3   -3.70    2.90
   4   6   4   15.00    3.20
  -4  -6  -4    9.50    4.20
   4   6   5   29.90    2.50
  -4  -6  -5   18.40    3.50
   4   6   6   35.70    2.80
  -4  -6  -6   41.60    5.20
   4   6   7   23.00    1.20
  -4  -6  -7   25.50    4.50
   4   6   8    1.90    1.30
  -4  -6  -8    4.20    4.20
   4   6   9   39.80    4.40
  -4  -6  -9   24.90    4.40
   4   6  10    0.90    4.20
  -4  -6 -10   -0.10    3.00
   4   6  11    1.70    2.90
  -4  -6 -11    2.00    1.70
   4   6  12   18.50    3.90
  -4  -6 -12   32.10    2.50
   4   6  13   -2.30    3.80
  -4  -6 -13    0.20    0.90
   4   6  14   76.00    6.60
  -4  -6 -14   66.90    2.60
   4   6  15   73.30    8.50
  -4  -6 -15   87.10    3.40
  -4  -6 -16   11.50    1.40
  -4  -6 -17   76.30    3.50
  -4  -6 -18   30.50    2.10
  -4  -6 -19    1.60    1.40
  -4  -6 -20   25.00    7.20
  -4  -6 -21   12.20    5.30
  -4  -6 -22    3.40    6.40
   4   7 -16   12.90    6.20
  -4  -7  16    4.70    6.10
   4   7 -15    4.20    4.20
  -4  -7  15   -4.40    5.70
   4   7 -14    4.50    4.50
  -4  -7  14   -5.60    3.90
   4   7 -13   31.50    6.30
  -4  -7  13   21.00    5.20
   4   7 -12    2.20    5.10
  -4  -7  12    3.00    4.60
  -4  -7  11   10.80    6.20
  -4  -7  10   61.90    6.80
  -4  -7   9  210.40   11.20
  -4  -7   8   47.50    4.80
  -4  -7   7   53.40    4.50
  -4  -7   6    0.20    2.90
  -4  -7   5   56.00    4.20
  -4  -7   4   23.20    2.40
  -4  -7   3  158.30    5.80
  -4  -7   2   36.10    2.90
  -4  -7   1   46.60    3.60
   4   7   0   56.50    5.50
  -4  -7   0   58.30    4.50
   4   7   1   99.80    6.80
  -4  -7  -1   97.00    5.70
   4   7   2  874.40   45.70
  -4  -7  -2  916.50   33.40
   4   7   3   44.60    5.00
  -4  -7  -3   36.50    3.70
   4   7   4   17.30    3.90
  -4  -7  -4   18.00    3.00
   4   7   5  357.80   18.80
  -4  -7  -5  349.70   14.80
   4   7   6   19.90    2.20
  -4  -7  -6   25.20    3.30
   4   7   7    4.60    0.80
  -4  -7  -7    0.30    2.60
   4   7   8   30.50    1.90
  -4  -7  -8   27.50    3.70
   4   7   9    1.10    1.50
   4   7  10    9.70    3.20
  -4  -7 -10   13.70    3.60
   4   7  11    0.20    2.80
  -4  -7 -11    3.70    4.50
   4   7  12    6.20    5.00
  -4  -7 -12   10.00    4.90
   4   7  13   18.50    5.40
  -4  -7 -13    9.60    3.30
   4   7  14   -1.20    4.90
  -4  -7 -14    8.60    4.60
   4   7  15   13.30    4.60
  -4  -7 -15   13.20    1.70
  -4  -7 -16   15.60    1.20
  -4  -7 -17    3.50    0.90
  -4  -7 -18   46.60    3.90
  -4  -7 -19    2.70    3.80
  -4  -7 -20   14.20    6.30
  -4  -7 -21    3.50    7.70
  -4  -7 -22   -2.30    5.10
  -4  -8  15    8.00    6.80
  -4  -8  14   11.60    8.40
  -4  -8  13    1.80    6.90
  -4  -8  12   -7.90    5.40
  -4  -8  11   15.70    4.60
  -4  -8  10   20.70    5.10
  -4  -8   9   10.30    5.00
  -4  -8   8   20.40    6.60
  -4  -8   7  377.50   14.80
  -4  -8   6    4.80    2.60
  -4  -8   5   18.30    2.70
  -4  -8   4   35.50    3.50
  -4  -8   3    0.00    2.20
  -4  -8   2   21.80    2.70
  -4  -8   1   13.40    2.20
   4   8   0   89.10    6.10
  -4  -8   0   88.00    6.70
   4   8   1   76.00    5.20
  -4  -8  -1   65.70    5.60
   4   8   2   58.10    5.80
  -4  -8  -2   57.10    5.20
   4   8   3  145.70    8.70
  -4  -8  -3  107.10    7.20
   4   8   4   65.30    5.20
  -4  -8  -4   59.10    5.10
   4   8   5   12.90    3.40
  -4  -8  -5   28.90    5.50
   4   8   6   32.00    5.10
  -4  -8  -6   41.50    4.40
   4   8   7   40.50    2.80
  -4  -8  -7   40.20    2.00
   4   8   8    1.10    0.40
  -4  -8  -8    3.50    4.00
   4   8   9   98.10    4.70
  -4  -8  -9  102.50    6.00
   4   8  10   -0.10    3.00
  -4  -8 -10    2.90    3.40
   4   8  11   -2.70    4.00
  -4  -8 -11    4.50    3.00
   4   8  12    9.90    3.40
  -4  -8 -12    9.50    3.90
   4   8  13   20.50    4.40
  -4  -8 -13   23.30    3.80
   4   8  14   23.60    4.90
  -4  -8 -14   23.90    4.30
  -4  -8 -15    3.30    3.90
  -4  -8 -16   45.00    6.90
  -4  -8 -17    0.90    4.30
  -4  -8 -18    6.60    4.00
  -4  -8 -19   -5.60    4.20
  -4  -8 -20   20.30    6.50
  -4  -8 -21   10.30    5.60
  -4  -8 -22    0.00    8.40
  -4  -9  14   10.30    5.90
  -4  -9  13   10.70    5.60
  -4  -9  12   -2.90    5.20
  -4  -9  11   -1.70    5.80
  -4  -9  10    7.50    4.40
  -4  -9   9    1.90    3.80
  -4  -9   8   52.30    5.70
  -4  -9   7  117.90    9.90
  -4  -9   6  148.00    8.30
  -4  -9   5    2.70    3.40
  -4  -9   4   22.10    3.50
  -4  -9   3  123.40    5.40
  -4  -9   2    3.50    2.50
  -4  -9   1   -2.10    2.40
   4   9   0    9.00    4.30
  -4  -9   0   13.20    4.30
   4   9   1   56.30    5.50
  -4  -9  -1   76.20    5.10
   4   9   2  222.30   12.70
  -4  -9  -2  227.60   10.70
   4   9   3   29.70    5.00
  -4  -9  -3   23.40    4.70
   4   9   4   11.60    3.00
  -4  -9  -4    6.60    3.00
   4   9   5  110.30    7.50
  -4  -9  -5  116.60    6.70
   4   9   6    7.00    2.70
  -4  -9  -6    0.40    4.40
   4   9   7  166.60   10.70
  -4  -9  -7  161.90    6.10
   4   9   8  121.70    5.50
  -4  -9  -8  109.00    7.30
   4   9   9   44.70    3.00
  -4  -9  -9   53.40    5.50
   4   9  10   58.00    2.80
  -4  -9 -10   52.90    5.90
   4   9  11   78.10    7.70
  -4  -9 -11   82.60    6.70
   4   9  12    0.70    3.50
  -4  -9 -12    1.40    3.70
   4   9  13    1.50    4.80
  -4  -9 -13   10.00    3.70
   4   9  14   -7.20    5.30
  -4  -9 -14    9.30    4.40
  -4  -9 -15    4.60    5.20
  -4  -9 -16    7.90    3.90
  -4  -9 -17    2.00    4.30
  -4  -9 -18   31.00    7.60
  -4  -9 -19   18.00    4.80
  -4  -9 -20    2.70    6.90
  -4  -9 -21   35.60    7.80
  -4  -9 -22    5.80    6.40
  -4 -10  13    2.70    8.10
  -4 -10  12   14.40    8.10
  -4 -10  11    9.60    5.60
  -4 -10  10    6.80    4.70
  -4 -10   9    3.90    4.30
  -4 -10   8   15.00    6.50
  -4 -10   7   17.80    5.10
  -4 -10   6   70.70    7.20
  -4 -10   5    8.60    3.00
  -4 -10   4    8.60    2.90
  -4 -10   3    9.40    3.00
  -4 -10   2    9.50    2.60
  -4 -10   1   18.90    3.30
   4  10   0    2.60    2.90
  -4 -10   0   -7.40    4.40
   4  10   1    6.20    3.90
  -4 -10  -1    1.00    4.40
   4  10   2   19.40    3.60
  -4 -10  -2   15.90    4.90
   4  10   3  172.10    9.50
  -4 -10  -3  158.00    9.60
   4  10   4   -1.30    3.10
  -4 -10  -4   -2.50    2.90
   4  10   5   76.20    5.70
  -4 -10  -5   84.00    6.70
   4  10   6  239.80   12.90
  -4 -10  -6  198.70   10.10
   4  10   7   78.60    5.70
  -4 -10  -7   80.00    3.80
   4  10   8  200.80   11.10
  -4 -10  -8  195.60    8.00
   4  10   9    5.00    1.90
  -4 -10  -9   -0.10    3.40
   4  10  10    1.90    1.70
  -4 -10 -10   14.00    4.90
   4  10  11   -1.60    3.90
  -4 -10 -11    3.40    5.20
   4  10  12    8.40    5.80
  -4 -10 -12    7.50    4.40
   4  10  13   18.50    4.70
  -4 -10 -13   17.50    4.60
  -4 -10 -14   19.90    6.90
  -4 -10 -15    0.90    4.90
  -4 -10 -16    7.10    4.80
  -4 -10 -17   -0.70    4.50
  -4 -10 -18    3.00    4.70
  -4 -10 -19    1.10    4.90
  -4 -10 -20   18.00    6.70
  -4 -10 -21   -1.90    5.70
  -4 -10 -22    0.10    5.90
  -4 -11  12   -0.70    4.50
  -4 -11  11   44.20   10.00
  -4 -11  10   11.20    6.80
  -4 -11   9    2.80    4.60
  -4 -11   8   43.40    5.50
  -4 -11   7    6.00    5.50
  -4 -11   6   -1.90    3.70
  -4 -11   5   25.50    5.80
  -4 -11   4   21.20    5.80
  -4 -11   3  137.30    8.00
  -4 -11   2   -4.20    2.60
  -4 -11   1   -0.80    2.70
   4  11   0   -6.20    3.00
  -4 -11   0    0.80    2.50
   4  11   1   -0.20    4.70
  -4 -11  -1   -1.80    2.90
   4  11   2   15.80    3.80
  -4 -11  -2    4.40    3.30
   4  11   3   35.00    5.30
  -4 -11  -3   26.80    4.50
   4  11   4   90.00    7.50
  -4 -11  -4   82.00    6.70
   4  11   5   55.90    5.70
  -4 -11  -5   64.30    6.60
   4  11   6   24.30    4.40
  -4 -11  -6   38.00    5.00
   4  11   7    9.00    4.50
  -4 -11  -7    0.30    1.10
   4  11   8   69.80    7.00
  -4 -11  -8   69.60    3.80
   4  11   9   38.90    1.50
  -4 -11  -9   47.40    6.30
   4  11  10    1.90    1.80
  -4 -11 -10    1.40    4.10
   4  11  11   56.60    2.90
  -4 -11 -11   56.30    5.40
   4  11  12   -4.80    3.40
  -4 -11 -12    0.70    3.80
  -4 -11 -13   21.00    4.50
  -4 -11 -14    6.10    6.50
  -4 -11 -15    5.50    5.90
  -4 -11 -16    5.20    3.60
  -4 -11 -17    7.90    4.80
  -4 -11 -18   -2.50    4.30
  -4 -11 -19   21.60    5.50
  -4 -11 -20   -0.10    5.10
  -4 -11 -21    7.50    6.10
  -4 -11 -22    7.50    7.40
  -4 -12  11    3.50    5.60
  -4 -12  10    1.50    5.40
  -4 -12   9    7.40    6.20
  -4 -12   8    5.10    4.70
  -4 -12   7    2.60    4.70
  -4 -12   6   13.30    5.90
  -4 -12   5   26.10    7.40
  -4 -12   4   26.70    6.10
  -4 -12   3   42.50    5.20
  -4 -12   2   83.90    5.20
  -4 -12   1   37.30    4.10
  -4 -12   0   18.20    2.70
   4  12   1  166.80   12.60
  -4 -12  -1  162.80    9.80
   4  12   2   17.60    4.50
  -4 -12  -2   28.50    5.70
   4  12   3    2.00    3.60
  -4 -12  -3    7.10    5.60
   4  12   4   19.80    6.10
  -4 -12  -4   20.60    5.60
   4  12   5   33.10    6.00
  -4 -12  -5   45.70    5.80
   4  12   6    0.70    3.20
  -4 -12  -6    6.40    5.90
   4  12   7   10.00    3.60
  -4 -12  -7   11.50    1.90
   4  12   8    5.70    4.20
  -4 -12  -8    6.30    1.70
   4  12   9   44.80    2.50
  -4 -12  -9   46.80    3.40
   4  12  10   72.90    4.60
  -4 -12 -10   73.90    8.10
   4  12  11    0.20    1.50
  -4 -12 -11    4.30    3.90
  -4 -12 -12   10.10    4.10
  -4 -12 -13   62.30    6.80
  -4 -12 -14   66.00    7.40
  -4 -12 -15   23.80    6.30
  -4 -12 -16    5.20    4.60
  -4 -12 -17   -7.30    4.30
  -4 -12 -18   15.90    5.20
  -4 -12 -19   -0.40    5.00
  -4 -12 -20    0.50    6.10
  -4 -12 -21    7.20    5.40
  -4 -12 -22   -6.30    5.30
  -4 -13  10   -5.60    8.00
  -4 -13   9   -4.30    5.00
  -4 -13   8   18.90    7.30
  -4 -13   7    2.60    4.90
  -4 -13   6   -3.70    3.80
  -4 -13   5    4.20    4.20
  -4 -13   4   -1.10    3.60
  -4 -13   3   91.70    7.60
  -4 -13   2   11.80    3.90
  -4 -13   1   -1.50    4.90
  -4 -13   0   40.70    4.00
   4  13   1   17.50    5.30
  -4 -13  -1   15.20    5.60
   4  13   2    2.00    3.30
  -4 -13  -2    1.80    4.00
   4  13   3  128.10    8.80
  -4 -13  -3  112.30    7.20
   4  13   4   49.70    6.30
  -4 -13  -4   59.70    5.40
   4  13   5   40.60    7.20
  -4 -13  -5   43.10    4.90
   4  13   6   46.90    7.80
  -4 -13  -6   60.00    4.10
   4  13   7   38.70    6.90
  -4 -13  -7   34.10    3.50
   4  13   8    4.10    5.10
  -4 -13  -8   12.70    2.70
   4  13   9    2.60    1.10
  -4 -13  -9   -1.00    1.60
   4  13  10   -3.00    4.30
  -4 -13 -10   21.70    6.50
   4  13  11   16.40    2.50
  -4 -13 -11   23.30    6.50
   4  13  12   25.00    2.30
  -4 -13 -12   17.00    6.30
  -4 -13 -13   -0.30    4.40
  -4 -13 -14    9.90    4.70
  -4 -13 -15    0.80    6.50
  -4 -13 -16   -4.90    4.20
  -4 -13 -17   27.10    6.90
  -4 -13 -18    4.50    7.60
  -4 -13 -19   -4.60    5.00
  -4 -13 -20    4.40    8.60
  -4 -13 -21    3.20    5.60
  -4 -14   9    0.10    7.00
  -4 -14   8    5.40    4.90
  -4 -14   7   21.00    7.50
  -4 -14   6   19.10    5.40
  -4 -14   5    9.70    4.90
  -4 -14   4   16.90    4.90
  -4 -14   3   -1.60    3.60
  -4 -14   2   12.80    4.80
  -4 -14   1   37.80    6.60
  -4 -14   0   -2.00    3.80
  -4 -14  -1   67.60    7.70
  -4 -14  -2   12.10    4.20
   4  14   3    6.30    4.50
  -4 -14  -3   -9.00    5.10
   4  14   4  286.40   22.70
  -4 -14  -4  294.60   17.30
   4  14   5    1.20    3.60
  -4 -14  -5    9.10    4.30
   4  14   6   87.50    8.80
  -4 -14  -6   89.50    4.60
   4  14   7  115.90    9.10
  -4 -14  -7  136.80    6.20
  -4 -14  -8    0.20    2.60
   4  14   9   28.20    2.90
  -4 -14  -9   29.70    3.00
   4  14  10   28.40    2.20
  -4 -14 -10   31.60    5.30
   4  14  11    4.60    2.30
  -4 -14 -11   -2.90    4.00
   4  14  12   19.00    2.20
  -4 -14 -12   21.70    5.20
  -4 -14 -13    6.00    6.10
  -4 -14 -14   37.20    8.20
  -4 -14 -15   -5.30    3.80
  -4 -14 -16   -2.30    6.70
  -4 -14 -17   15.10    5.60
  -4 -14 -18   -0.70    5.20
  -4 -14 -19   10.90    6.20
  -4 -14 -20    1.30    9.00
  -4 -14 -21    8.40    6.60
  -4 -15   6   13.50    7.50
  -4 -15   5   16.40    7.30
  -4 -15   4    9.90    5.10
  -4 -15   3   16.00    4.80
  -4 -15   2    8.80    4.40
  -4 -15   1   -1.00    5.70
  -4 -15   0   19.10    6.10
  -4 -15  -1    1.10    4.40
  -4 -15  -2    4.00    5.60
  -4 -15  -3   16.90    5.20
  -4 -15  -4   28.20    6.60
  -4 -15  -5   39.50    3.80
  -4 -15  -6    0.20    2.50
  -4 -15  -7   20.10    2.70
  -4 -15  -8  107.30    6.20
   4  15   9    6.50    2.30
  -4 -15  -9    7.60    2.60
   4  15  10   10.60    1.90
  -4 -15 -10   12.10    4.60
  -4 -15 -11   26.60    5.40
   4  15  12    4.90    2.30
  -4 -15 -12   11.00    6.70
  -4 -15 -13   12.70    4.20
  -4 -15 -14   59.30    8.30
  -4 -15 -15   17.70    7.50
  -4 -15 -16   15.10    5.60
  -4 -15 -17   66.80    9.80
  -4 -15 -18   45.30    8.50
  -4 -15 -19   31.90    8.90
  -4 -15 -20    7.30    7.20
  -4 -16   6   -5.70    5.00
  -4 -16   5   15.40    7.80
  -4 -16   4   15.00    7.40
  -4 -16   3    9.20    4.50
  -4 -16   2    3.10    4.50
  -4 -16   1    5.10    6.10
  -4 -16   0    5.40    6.20
  -4 -16  -1   -1.10    4.10
  -4 -16  -2   16.30    4.20
  -4 -16  -3   12.70    6.30
  -4 -16  -4   12.20    4.50
  -4 -16  -5    8.30    3.50
  -4 -16  -6   23.30    4.00
  -4 -16  -7   -2.30    2.70
  -4 -16  -8   10.50    3.10
   4  16   9    8.10    2.70
  -4 -16  -9    5.40    2.70
   4  16  10    0.70    1.60
  -4 -16 -10    0.90    2.10
  -4 -16 -11   11.80    6.90
  -4 -16 -12    5.40    4.70
  -4 -16 -13    8.00    5.30
  -4 -16 -14    6.50    7.10
  -4 -16 -15   35.50    6.70
  -4 -16 -16   -0.60    7.50
  -4 -16 -17   72.50   10.00
  -4 -16 -18   27.00    8.70
  -4 -16 -19   -0.50    6.60
  -4 -16 -20    9.40   10.60
  -4 -17   4   13.50    7.50
  -4 -17   3    9.60    7.30
  -4 -17   2   34.30    8.80
  -4 -17   1    1.90    6.90
  -4 -17   0    2.10    6.10
  -4 -17  -1   -2.40    6.30
  -4 -17  -2    7.10    4.80
  -4 -17  -3    5.80    4.10
  -4 -17  -4    0.10    3.00
  -4 -17  -5    0.60    3.20
  -4 -17  -6   -2.90    2.70
  -4 -17  -7    4.80    2.30
  -4 -17  -8   17.00    2.70
  -4 -17  -9   22.00    4.20
  -4 -17 -10   33.60    3.80
  -4 -17 -11   83.40    9.60
  -4 -17 -12    7.30    4.10
  -4 -17 -13    1.80    6.90
  -4 -17 -14   15.10    6.10
  -4 -17 -15   11.30    5.80
  -4 -17 -16   52.90    7.20
  -4 -17 -17   17.60    8.60
  -4 -17 -18    0.00    5.60
  -4 -17 -19   29.70   10.50
  -4 -18   2    3.50    7.40
  -4 -18   1   62.00    9.20
  -4 -18   0   -3.20    6.60
  -4 -18  -1    9.40    6.50
  -4 -18  -2   -4.40    4.80
  -4 -18  -3    0.30    2.90
  -4 -18  -4    2.20    3.30
  -4 -18  -5   -3.10    3.20
  -4 -18  -6    4.00    2.60
  -4 -18  -7    6.20    3.70
  -4 -18  -8    3.40    2.90
  -4 -18  -9   -1.10    2.40
  -4 -18 -10   17.20    3.60
  -4 -18 -11    6.00    6.70
  -4 -18 -12    3.10    5.00
  -4 -18 -13   17.10    7.90
  -4 -18 -14    6.50    6.50
  -4 -18 -15   21.00    8.70
  -4 -18 -16   -8.30    6.00
  -4 -18 -17    5.50    6.80
  -4 -18 -18   30.60    8.10
  -4 -19  -1   11.40    7.30
  -4 -19  -2   12.20    3.80
  -4 -19  -3   23.50    4.40
  -4 -19  -4    8.10    3.40
  -4 -19  -5    9.60    3.90
  -4 -19  -6    1.20    3.20
  -4 -19  -7    1.60    3.60
  -4 -19  -8   -3.90    3.00
  -4 -19  -9   -1.60    2.50
  -4 -19 -10    9.20    3.90
  -4 -19 -11   -0.30    7.10
  -4 -19 -12    0.00    5.00
  -4 -19 -13   32.90    9.50
  -4 -19 -14   -1.70    5.50
  -4 -19 -15   16.60    7.70
  -4 -19 -16   11.40    6.80
  -4 -20  -4   10.70    3.80
  -4 -20  -5   -3.90    3.30
  -4 -20  -6   -0.70    4.00
  -4 -20  -7   15.60    4.00
  -4 -20  -8    0.20    3.50
  -4 -20  -9   -1.80    3.50
  -4 -20 -10   -3.30    4.40
  -4 -20 -11   -1.50    6.10
  -4 -20 -12    4.60    6.30
  -4 -20 -13   52.40    8.40
  -4 -20 -14   -2.40    6.00
  -5  19   9    0.70    5.10
  -5  19   8   10.90    5.50
  -5  18  11    0.40    4.70
  -5  18  10   14.90    5.00
  -5  18   9    9.30    5.20
  -5  18   8    4.20    7.10
  -5  18   7   41.60    7.50
  -5  18   6   14.40    8.60
  -5  18   5    8.30    5.10
  -5  18   4   12.30    6.00
  -5  18   3    7.40    5.50
  -5  18   2   72.60   10.70
   5 -17 -16   -3.10    5.20
   5 -17 -15    2.60    4.00
   5 -17 -14    0.60    5.30
   5 -17 -13    3.90    4.40
   5 -17 -12   -0.20    2.40
  -5  17  12    3.80    5.10
  -5  17  11  -10.90    5.50
  -5  17  10    2.00    6.40
  -5  17   9    5.70    6.10
  -5  17   8   13.30    7.00
  -5  17   7    3.00    4.80
  -5  17   6   27.90    7.60
  -5  17   5    0.40    5.20
  -5  17   4   10.60    6.00
  -5  17   3    3.10    6.30
  -5  17   2    7.90    6.00
   5 -17  -1    5.10    5.00
   5 -17   0    1.60    9.10
   5 -17   1    6.10    8.90
   5 -16 -17    7.10    5.90
   5 -16 -16    0.40    3.60
   5 -16 -15    2.60    3.70
   5 -16 -14    6.40    5.10
   5 -16 -13    0.50    3.10
  -5  16  13    1.90    3.50
   5 -16 -12    5.70    4.10
  -5  16  12   -1.00    4.10
   5 -16 -11    2.30    3.80
  -5  16  11   11.90    6.10
   5 -16 -10   -1.80    2.20
  -5  16  10   -1.20    4.40
   5 -16  -9    3.60    2.90
  -5  16   9   13.20    4.40
   5 -16  -8    8.10    1.90
  -5  16   8   15.00    4.10
  -5  16   7    6.80    6.60
  -5  16   6   -6.80    4.40
  -5  16   5   25.30    7.30
  -5  16   4    9.70    4.90
  -5  16   3    7.10    4.50
  -5  16   2    4.00    5.60
   5 -16  -1   20.60    6.40
   5 -16   0    3.20    5.30
   5 -16   1   62.10    8.10
   5 -16   2   37.10    9.30
   5 -16   3   14.30    7.20
   5 -15 -18   -0.10    4.30
   5 -15 -17   -2.20    2.50
   5 -15 -16    7.00    5.10
   5 -15 -15    2.00    4.50
   5 -15 -14    1.90    3.10
   5 -15 -13   25.20    4.40
   5 -15 -12    2.50    3.60
  -5  15  12    6.90    5.00
   5 -15 -11   -3.30    2.40
  -5  15  11    5.50    4.70
   5 -15 -10    3.30    2.80
  -5  15  10    8.10    3.80
   5 -15  -9    2.30    2.20
  -5  15   9   -1.60    3.50
   5 -15  -8    4.70    2.40
  -5  15   8    1.10    6.40
   5 -15  -7    3.40    2.30
  -5  15   7    5.70    3.70
   5 -15  -6    4.70    1.80
  -5  15   6    8.30    4.60
   5 -15  -5   -0.20    1.20
  -5  15   5    2.00    4.20
   5 -15  -4    0.10    1.10
  -5  15   4   -5.70    5.10
  -5  15   3    0.30    4.90
  -5  15   2    0.30    3.90
   5 -15  -1   11.40    5.50
   5 -15   0    3.20    4.70
   5 -15   1   14.40    5.40
   5 -15   2   -4.00    5.30
   5 -15   3    4.10    7.40
   5 -15   4   14.00    5.60
   5 -15   5   21.90    8.90
   5 -14 -19   46.00    6.80
   5 -14 -18   17.20    3.80
   5 -14 -17    8.70    3.10
   5 -14 -16    5.70    2.70
   5 -14 -15    2.50    2.40
   5 -14 -14    4.40    3.20
   5 -14 -13   -2.80    2.50
  -5  14  13   -1.70    2.50
   5 -14 -12   11.10    4.10
  -5  14  12    8.30    2.70
   5 -14 -11   -1.30    3.50
  -5  14  11    5.90    2.40
   5 -14 -10    3.50    2.30
  -5  14  10   -0.20    2.40
   5 -14  -9   29.10    4.30
  -5  14   9   22.00    3.00
   5 -14  -8   12.30    2.60
  -5  14   8   13.10    2.70
   5 -14  -7    8.20    2.40
  -5  14   7    1.30    2.10
   5 -14  -6    4.60    1.80
  -5  14   6    1.30    1.90
   5 -14  -5    7.50    1.50
  -5  14   5    8.50    1.70
   5 -14  -4   11.50    1.20
  -5  14   4   14.00    3.70
   5 -14  -3    8.00    0.80
  -5  14   3    8.30    5.40
  -5  14   2   -1.90    6.50
   5 -14  -1   13.70    5.00
   5 -14   0   32.20    4.80
   5 -14   1   22.10    5.30
   5 -14   2    2.60    4.70
   5 -14   3   18.20    5.90
   5 -14   4   10.90    7.00
   5 -14   5    4.20    4.90
   5 -14   6    5.90    7.50
   5 -13 -19   46.90    5.20
   5 -13 -18   11.70    3.10
   5 -13 -17    8.80    3.00
   5 -13 -16    6.60    3.70
   5 -13 -15    3.00    2.50
   5 -13 -14    6.80    2.50
  -5  13  14    3.70    3.30
   5 -13 -13    3.60    2.60
  -5  13  13    5.90    2.70
   5 -13 -12    9.70    2.40
  -5  13  12    5.70    3.90
   5 -13 -11   35.00    3.10
  -5  13  11   25.30    3.30
   5 -13 -10    8.60    2.70
  -5  13  10    3.30    2.50
   5 -13  -9    8.00    3.00
  -5  13   9    3.00    2.10
   5 -13  -8    8.50    2.70
  -5  13   8    4.30    2.00
   5 -13  -7    1.50    2.20
  -5  13   7    0.40    1.90
   5 -13  -6    0.60    1.60
  -5  13   6   -2.40    2.00
   5 -13  -5   35.60    3.00
  -5  13   5   38.00    3.00
   5 -13  -4    1.40    0.80
  -5  13   4   -2.80    3.80
   5 -13  -3   18.80    1.10
  -5  13   3   20.50    4.30
  -5  13   2    4.10    6.10
   5 -13  -1    6.10    4.20
   5 -13   0   91.00    9.00
   5 -13   1    4.70    4.50
   5 -13   2   25.80    5.40
   5 -13   3    3.30    4.80
   5 -13   4    2.30    5.10
   5 -13   5   16.40    5.60
   5 -13   6    9.10    5.10
   5 -13   7    2.00    7.10
   5 -13   8   -1.70    5.30
   5 -12 -20   20.90    3.70
   5 -12 -19    5.70    3.50
   5 -12 -18    2.20    3.00
   5 -12 -17   11.40    3.00
   5 -12 -16    6.00    3.60
   5 -12 -15    2.90    3.20
   5 -12 -14   -0.90    2.40
  -5  12  14    5.30    3.60
   5 -12 -13    1.80    3.00
  -5  12  13    5.40    2.90
   5 -12 -12    5.20    2.40
  -5  12  12    7.50    4.20
   5 -12 -11   42.00    3.90
  -5  12  11   32.20    3.00
   5 -12 -10    6.70    2.60
  -5  12  10   11.60    2.20
   5 -12  -9   25.80    2.60
  -5  12   9   18.10    2.80
   5 -12  -8   34.70    3.80
  -5  12   8   36.80    3.10
   5 -12  -7   11.70    2.30
  -5  12   7    9.30    2.00
   5 -12  -6   13.90    2.60
  -5  12   6   19.80    2.20
   5 -12  -5    2.00    1.30
  -5  12   5    2.20    1.40
   5 -12  -4    0.80    1.00
  -5  12   4    1.00    1.10
   5 -12  -3    0.40    0.60
  -5  12   3   -0.40    2.70
  -5  12   2   -5.20    2.50
   5 -12  -1   33.10    5.80
  -5  12   1   45.80    5.30
   5 -12   0    5.30    5.00
   5 -12   1   -1.80    3.80
   5 -12   2  116.50    8.90
   5 -12   3    7.70    4.80
   5 -12   4    1.00    1.10
   5 -12   5    8.30    4.80
   5 -12   6   -1.90    5.30
   5 -12   7   15.20    5.80
   5 -12   8    7.50    5.00
   5 -12   9   22.00    8.80
   5 -12  10   10.70    6.50
   5 -11 -20    6.70    4.60
   5 -11 -19   14.40    3.30
   5 -11 -18    2.00    4.00
   5 -11 -17   43.00    4.00
   5 -11 -16    0.20    2.30
   5 -11 -15    0.20    2.30
   5 -11 -14   41.20    3.40
  -5  11  14   39.90    6.40
   5 -11 -13   10.00    2.80
  -5  11  13    7.90    4.20
   5 -11 -12    4.00    1.80
  -5  11  12    1.60    3.60
   5 -11 -11   -5.10    2.10
  -5  11  11   -0.70    2.50
   5 -11 -10    2.00    1.80
  -5  11  10    3.70    1.80
   5 -11  -9    6.40    2.20
  -5  11   9   23.60    3.00
   5 -11  -8    1.80    1.70
  -5  11   8    5.30    1.80
  -5  11   7    2.60    1.30
   5 -11  -6    0.20    1.50
  -5  11   6   -0.80    1.40
   5 -11  -5   13.70    1.80
  -5  11   5   14.90    1.70
   5 -11  -4    2.30    1.00
  -5  11   4    2.40    1.00
   5 -11  -3   13.10    0.90
  -5  11   3   13.60    2.80
  -5  11   2    3.00    3.30
   5 -11  -1   -2.80    3.20
  -5  11   1    3.50    2.50
   5 -11   0   17.30    4.80
  -5  11   0   17.10    3.90
   5 -11   1    0.20    3.80
   5 -11   2   16.80    4.70
   5 -11   3    0.80    3.90
   5 -11   4    7.80    0.80
   5 -11   5    8.70    1.20
   5 -11   6   -1.50    1.70
   5 -11   7    0.20    1.60
   5 -11   8    0.00    6.50
   5 -11   9    3.20    5.20
   5 -11  10   -2.50    6.80
   5 -11  11   -2.70    7.30
   5 -10 -21    5.90    3.50
   5 -10 -20    9.90    3.60
   5 -10 -19   16.40    3.70
   5 -10 -18   20.40    3.60
   5 -10 -17   63.20    5.60
   5 -10 -16    8.10    2.50
   5 -10 -15    1.00    2.50
   5 -10 -14   77.50    4.50
  -5  10  14   71.60    7.20
   5 -10 -13  138.60    6.70
  -5  10  13  121.30    8.90
   5 -10 -12   31.00    2.60
  -5  10  12   38.60    5.30
   5 -10 -11   27.90    3.20
  -5  10  11   22.10    3.20
   5 -10 -10   42.80    3.30
  -5  10  10   39.10    2.80
   5 -10  -9   10.60    2.20
  -5  10   9   11.60    2.10
   5 -10  -8   56.50    3.60
  -5  10   8   50.80    2.90
   5 -10  -7    7.50    1.90
  -5  10   7    5.20    1.20
   5 -10  -6    2.00    1.40
  -5  10   6    0.40    1.30
   5 -10  -5    6.00    1.80
  -5  10   5    6.70    1.30
   5 -10  -4    0.30    1.10
  -5  10   4    4.70    1.00
   5 -10  -3    2.90    0.70
  -5  10   3    3.10    2.10
  -5  10   2   -0.90    2.30
  -5  10   1    7.80    3.00
   5 -10   0   12.80    5.10
  -5  10   0    3.80    2.60
   5 -10   1    6.40    3.80
  -5  10  -1    6.10    2.90
   5 -10   2    9.60    4.30
  -5  10  -2   -0.30    3.60
   5 -10   3    7.90    4.10
   5 -10   4   48.40    2.20
   5 -10   5    1.90    1.00
   5 -10   6    9.80    1.10
   5 -10   7    4.80    1.50
   5 -10   8   16.90    2.20
   5 -10   9    0.70    2.20
   5 -10  10   27.10    7.40
   5 -10  11    1.80    5.50
   5 -10  12   52.40    8.40
   5  -9 -21   10.30    5.90
   5  -9 -20    0.20    5.20
   5  -9 -19   15.00    6.70
   5  -9 -18    6.10    4.30
   5  -9 -17   -2.80    5.30
   5  -9 -16   -0.10    1.80
   5  -9 -15    2.80    2.10
   5  -9 -14   23.50    2.40
  -5   9  14   17.70    4.90
   5  -9 -13  131.40    4.90
  -5   9  13  113.60    9.40
   5  -9 -12   32.10    2.90
  -5   9  12   41.60    5.20
   5  -9 -11  297.20   12.40
  -5   9  11  280.30   17.20
   5  -9 -10  104.30    5.40
  -5   9  10  101.30    7.50
   5  -9  -9    4.00    1.90
  -5   9   9    5.40    2.00
   5  -9  -8   77.60    3.90
  -5   9   8   69.20    3.20
   5  -9  -7   62.10    3.70
  -5   9   7   59.30    2.80
   5  -9  -6   12.60    1.80
  -5   9   6    9.10    1.50
   5  -9  -5  107.80    4.40
  -5   9   5  105.90    4.70
   5  -9  -4    8.60    1.20
  -5   9   4   10.20    1.10
   5  -9  -3    3.50    0.60
  -5   9   3    4.30    0.70
  -5   9   2    5.10    2.10
  -5   9   1   16.20    2.50
   5  -9   0  103.00    7.20
  -5   9   0  101.80    5.60
   5  -9   1    7.70    5.20
  -5   9  -1   15.50    3.90
   5  -9   2   53.10    5.20
  -5   9  -2   36.00    5.30
   5  -9   3    0.50    3.70
  -5   9  -3   -1.80    3.00
   5  -9   4   27.90    1.30
  -5   9  -4   24.10    4.20
   5  -9   5   33.50    1.60
   5  -9   6  128.30    4.60
   5  -9   7    8.00    1.30
   5  -9   8    0.90    1.60
   5  -9   9    1.70    1.90
   5  -9  10    7.00    2.20
   5  -9  11   17.30    3.20
   5  -9  12    0.30    4.10
   5  -9  13    2.20    5.90
   5  -8 -21   24.10    7.50
   5  -8 -20   -4.50    5.40
   5  -8 -19   15.80    6.70
   5  -8 -18    8.10    4.80
   5  -8 -17    4.40    2.90
   5  -8 -16   14.80    2.40
   5  -8 -15   71.10    4.60
   5  -8 -14   33.40    3.60
  -5   8  14   43.50    5.40
   5  -8 -13  111.20    5.80
  -5   8  13  122.60   10.00
   5  -8 -12  333.40   11.10
  -5   8  12  293.30   17.00
   5  -8 -11  105.60    5.10
  -5   8  11   93.70    6.90
   5  -8 -10   65.60    3.10
  -5   8  10   64.90    4.40
   5  -8  -9  133.60    5.70
  -5   8   9  119.40    6.60
   5  -8  -8   13.70    2.20
  -5   8   8   10.20    1.70
   5  -8  -7    2.80    1.50
  -5   8   7    4.20    1.20
   5  -8  -6    7.70    1.60
  -5   8   6   10.70    1.30
   5  -8  -5    9.60    1.30
  -5   8   5   10.20    1.40
   5  -8  -4   44.60    2.10
  -5   8   4   51.40    2.50
   5  -8  -3    1.60    0.80
  -5   8   3    2.60    0.80
  -5   8   2    4.40    2.10
  -5   8   1   22.20    2.40
  -5   8   0    6.60    2.30
   5  -8   1   17.10    3.50
  -5   8  -1   15.10    2.60
   5  -8   2    2.30    4.70
  -5   8  -2   -0.30    2.80
   5  -8   3    5.10    3.00
  -5   8  -3    6.70    3.50
   5  -8   4   91.50    3.20
  -5   8  -4   85.50    7.20
   5  -8   5    3.80    0.80
  -5   8  -5    3.10    2.70
   5  -8   6    2.00    1.00
   5  -8   7    7.90    1.40
   5  -8   8    2.90    1.40
   5  -8   9   14.20    1.90
   5  -8  10   -1.70    2.50
  -5   8 -10    2.50    2.70
   5  -8  11   22.10    4.80
  -5   8 -11    5.70    2.60
   5  -8  12   11.70    4.40
  -5   8 -12    9.10    3.80
   5  -8  13   11.60    6.80
   5  -8  14   10.30    7.90
   5  -7 -21   -1.30    5.90
   5  -7 -20    1.90    5.00
   5  -7 -19    6.10    7.40
   5  -7 -18   13.50    5.00
   5  -7 -17    3.00    1.80
   5  -7 -16   -0.50    2.30
   5  -7 -15   38.70    3.60
   5  -7 -14    0.90    1.90
  -5   7  14    2.70    3.40
   5  -7 -13   23.40    2.90
  -5   7  13   20.10    3.50
   5  -7 -12    9.40    2.40
  -5   7  12    7.40    2.60
   5  -7 -11    1.30    1.70
  -5   7  11   -3.60    3.80
   5  -7 -10  153.00    5.70
  -5   7  10  149.60    9.60
   5  -7  -9  155.20    5.40
  -5   7   9  149.90    8.70
   5  -7  -8    1.90    1.60
  -5   7   8    5.30    2.20
   5  -7  -7    4.60    1.40
  -5   7   7    0.10    2.00
   5  -7  -6   92.10    4.10
  -5   7   6   82.40    3.50
   5  -7  -5   19.50    1.80
  -5   7   5   25.50    1.80
   5  -7  -4   65.80    3.40
  -5   7   4   64.30    2.90
   5  -7  -3   62.70    2.60
  -5   7   3   58.50    2.40
   5  -7  -2  160.70    7.30
  -5   7   2  173.20    5.50
  -5   7   1   20.30    2.20
  -5   7   0    0.30    1.60
   5  -7   1   20.90    4.00
  -5   7  -1   24.70    3.10
   5  -7   2   14.50    3.70
  -5   7  -2    8.10    3.10
   5  -7   3  147.20   10.40
  -5   7  -3  140.10    9.00
   5  -7   4    8.90    0.80
  -5   7  -4   18.90    4.20
   5  -7   5   27.80    1.40
  -5   7  -5   22.40    5.00
   5  -7   6    7.20    1.20
  -5   7  -6    8.10    5.00
   5  -7   7   20.80    2.20
  -5   7  -7   13.60    1.70
   5  -7   8  132.40    5.60
  -5   7  -8  119.30    9.00
   5  -7   9   39.70    3.10
  -5   7  -9   35.60    3.50
   5  -7  10    1.80    2.30
  -5   7 -10    1.70    2.00
   5  -7  11   11.90    3.30
  -5   7 -11    3.20    3.20
   5  -7  12   -6.30    6.00
  -5   7 -12    2.70    3.30
   5  -7  13    6.60    4.90
  -5   7 -13   -0.30    3.80
   5  -7  14   -3.50    4.20
  -5   7 -14   -8.40    4.30
   5  -7  15   11.60    5.60
   5  -6 -21    5.50    8.60
   5  -6 -20    8.10    5.80
   5  -6 -19   -5.30    6.30
   5  -6 -18    4.30    3.60
   5  -6 -17    2.70    2.50
   5  -6 -16    1.90    2.30
   5  -6 -15   -2.10    1.70
   5  -6 -14    0.90    2.80
  -5   6  14   -2.10    3.00
   5  -6 -13   11.30    2.70
  -5   6  13   10.20    3.60
   5  -6 -12   58.80    4.00
  -5   6  12   66.70    5.30
   5  -6 -11    5.00    2.30
  -5   6  11    2.60    3.70
   5  -6 -10   10.30    2.30
  -5   6  10    3.40    3.20
   5  -6  -9   76.50    4.10
  -5   6   9   77.20    5.00
   5  -6  -8   23.90    1.90
  -5   6   8   24.20    2.70
   5  -6  -7   45.30    2.50
  -5   6   7   42.00    2.70
   5  -6  -6  115.80    3.70
  -5   6   6  118.00    4.80
   5  -6  -5    8.50    1.40
  -5   6   5    7.80    1.70
   5  -6  -4   81.40    3.50
  -5   6   4   77.00    3.20
   5  -6  -3   29.90    1.50
  -5   6   3   32.50    2.00
   5  -6  -2   65.80    5.40
  -5   6   2   72.20    2.30
   5  -6  -1 1163.30   41.10
  -5   6   1 1199.80   31.80
  -5   6   0   -1.80    1.60
  -5   6  -1  125.70    4.50
   5  -6   2  144.40    7.60
  -5   6  -2  143.90    6.10
   5  -6   3    7.20    3.30
  -5   6  -3    7.90    3.30
   5  -6   4    4.80    0.60
  -5   6  -4    2.60    2.60
   5  -6   5   -0.20    1.10
  -5   6  -5   -0.40    1.00
   5  -6   6   11.90    1.60
  -5   6  -6   14.00    1.50
   5  -6   7    9.20    1.80
  -5   6  -7    5.80    1.60
   5  -6   8   20.90    2.40
  -5   6  -8   17.30    2.00
   5  -6   9   28.10    3.10
  -5   6  -9   20.60    2.50
   5  -6  10   20.10    2.30
  -5   6 -10   23.10    3.00
   5  -6  11    2.70    2.20
  -5   6 -11   -1.00    1.90
   5  -6  12   -0.80    2.10
  -5   6 -12    1.80    2.50
   5  -6  13   13.20    4.50
  -5   6 -13   16.40    3.30
   5  -6  14    8.80    5.90
  -5   6 -14    5.20    4.50
   5  -6  15    7.10    6.00
  -5   6 -15    0.00    3.30
   5  -6  16   20.50    7.70
  -5   6 -16   22.40    5.60
   5  -5 -21    0.90    5.70
   5  -5 -20    1.00    5.10
   5  -5 -19   -0.20    7.20
   5  -5 -18   -5.00    3.10
   5  -5 -17   15.20    2.80
   5  -5 -16    2.80    2.40
   5  -5 -15    5.20    2.90
   5  -5 -14    5.40    2.30
  -5   5  14    4.00    3.20
   5  -5 -13   21.70    2.80
  -5   5  13   11.80    3.80
   5  -5 -12   33.10    2.70
  -5   5  12   30.30    5.20
   5  -5 -11    6.60    1.80
  -5   5  11    7.60    3.10
   5  -5 -10   15.70    2.10
  -5   5  10   22.90    3.40
   5  -5  -9    3.10    1.70
  -5   5   9    1.20    2.90
   5  -5  -8    0.70    1.80
  -5   5   8    2.40    2.80
   5  -5  -7   36.60    2.50
  -5   5   7   33.20    3.90
   5  -5  -6    2.90    1.50
  -5   5   6    2.50    1.50
   5  -5  -5   23.80    2.00
  -5   5   5   24.20    2.20
   5  -5  -4    8.40    1.30
  -5   5   4    8.60    1.50
   5  -5  -3    4.70    1.00
  -5   5   3    2.70    1.10
   5  -5  -2   60.90    5.00
  -5   5   2   78.10    2.40
   5  -5  -1   -0.10    2.50
  -5   5   1    0.60    1.50
   5  -5   0   23.10    4.00
  -5   5   0   24.00    2.30
  -5   5  -1   58.60    2.90
   5  -5   2    2.60    2.40
  -5   5  -2    7.60    2.10
   5  -5   3    2.50    2.60
  -5   5  -3    9.10    2.60
   5  -5   4  115.60    5.20
  -5   5  -4  120.90    3.90
   5  -5   5   81.00    3.70
  -5   5  -5   85.00    3.50
   5  -5   6  151.40    6.10
  -5   5  -6  149.40    5.40
   5  -5   7    5.30    1.70
  -5   5  -7   -0.30    1.50
   5  -5   8   81.30    4.40
  -5   5  -8   78.90    4.10
   5  -5   9   50.50    3.60
  -5   5  -9   45.10    2.80
   5  -5  10    3.10    2.00
  -5   5 -10    3.30    2.20
   5  -5  11   12.80    2.50
  -5   5 -11   16.70    3.50
   5  -5  12    5.40    2.30
  -5   5 -12    4.70    3.30
   5  -5  13   17.20    3.40
  -5   5 -13   18.80    3.20
   5  -5  14   19.90    3.30
  -5   5 -14   36.30    5.40
   5  -5  15    4.70    3.50
  -5   5 -15    0.70    3.30
   5  -5  16    5.70    5.20
  -5   5 -16    1.30    4.60
   5  -5  17    0.90    5.40
  -5   5 -17    1.50    4.00
   5  -4 -21   -2.90    7.00
   5  -4 -20   -1.00    5.40
   5  -4 -19    3.50    4.80
   5  -4 -18   -0.10    2.80
   5  -4 -17    9.10    2.70
   5  -4 -16    0.60    3.50
   5  -4 -15   14.60    2.60
   5  -4 -14    0.70    2.10
  -5   4  14    2.40    5.00
   5  -4 -13    2.30    2.10
  -5   4  13   -3.00    3.30
   5  -4 -12    8.90    2.70
  -5   4  12    0.20    4.30
   5  -4 -11    3.80    2.80
  -5   4  11    3.60    3.00
   5  -4 -10    7.60    2.60
  -5   4  10    5.60    2.30
   5  -4  -9   -1.50    1.40
  -5   4   9   -1.00    1.80
   5  -4  -8    2.60    1.90
  -5   4   8   -2.70    1.70
   5  -4  -7    6.50    1.70
  -5   4   7   10.60    2.10
   5  -4  -6    5.90    1.60
  -5   4   6    2.30    2.30
   5  -4  -5    1.40    1.90
  -5   4   5    1.80    1.30
   5  -4  -4   53.50    3.30
  -5   4   4   60.30    4.00
   5  -4  -3   80.00    2.60
  -5   4   3   83.90    3.80
   5  -4  -2   34.20    2.60
  -5   4   2   31.10    1.50
   5  -4  -1   -1.10    2.40
  -5   4   1   -0.10    0.40
   5  -4   0    5.40    3.60
  -5   4   0    6.40    1.60
   5  -4   1    3.20    2.60
  -5   4  -1    8.00    1.70
  -5   4  -2  831.80   21.60
   5  -4   3   20.90    3.80
  -5   4  -3   12.30    0.80
   5  -4   4   71.70    8.00
  -5   4  -4   72.80    2.60
   5  -4   5  227.80    9.90
  -5   4  -5  218.60    7.60
   5  -4   6   79.20    4.10
  -5   4  -6   79.70    3.50
   5  -4   7  223.10    7.60
  -5   4  -7  215.70    7.60
   5  -4   8   13.90    2.30
  -5   4  -8   16.50    1.90
   5  -4   9    8.50    2.30
  -5   4  -9    8.30    2.10
   5  -4  10  295.70   11.10
  -5   4 -10  306.20   11.50
   5  -4  11   12.10    2.30
  -5   4 -11   16.00    2.50
   5  -4  12    5.80    2.90
  -5   4 -12    0.70    3.30
   5  -4  13    1.50    2.50
  -5   4 -13    1.60    2.70
   5  -4  14    8.30    3.20
  -5   4 -14   -0.60    4.30
   5  -4  15   14.80    4.60
  -5   4 -15    6.00    3.70
   5  -4  16    1.70    4.00
  -5   4 -16    0.70    3.60
   5  -4  17    0.20    3.90
  -5   4 -17    2.00    5.80
   5  -3 -20    2.70    6.00
   5  -3 -19    1.30    5.10
   5  -3 -18    2.20    6.50
   5  -3 -17    6.90    5.10
   5  -3 -16    2.00    4.40
   5  -3 -15   23.90    7.10
   5  -3 -14   -3.00    4.20
   5  -3 -13    6.30    2.40
  -5   3  13    1.40    3.10
   5  -3 -12    7.20    2.50
  -5   3  12    8.90    4.70
   5  -3 -11   45.90    3.90
  -5   3  11   44.50    5.10
   5  -3 -10   18.90    2.50
  -5   3  10   22.60    3.00
   5  -3  -9   31.30    3.30
  -5   3   9   25.60    3.20
   5  -3  -8   78.10    4.40
  -5   3   8   83.30    5.60
   5  -3  -7   17.10    2.60
  -5   3   7   23.30    3.60
   5  -3  -6   21.90    2.20
  -5   3   6   23.40    2.90
   5  -3  -5  109.70    4.60
  -5   3   5  110.70    5.70
   5  -3  -4   -1.10    1.30
  -5   3   4    2.30    1.60
   5  -3  -3    9.00    1.60
  -5   3   3    7.80    1.50
   5  -3  -2    7.70    2.00
  -5   3   2   10.00    1.20
   5  -3  -1   38.10    2.50
  -5   3   1   48.00    1.90
   5  -3   0   -0.60    3.70
  -5   3   0   -0.40    0.60
   5  -3   1  131.10    7.90
  -5   3  -1  144.70    3.30
  -5   3  -2   40.80    1.70
   5  -3   3  257.80   12.80
  -5   3  -3  256.40    5.90
   5  -3   4    2.50    0.90
  -5   3  -4    1.30    0.80
   5  -3   5    4.40    1.20
  -5   3  -5    1.60    1.30
   5  -3   6   19.00    1.90
  -5   3  -6   20.00    1.60
   5  -3   7   11.50    1.70
  -5   3  -7   15.60    1.90
   5  -3   8   37.10    2.90
  -5   3  -8   36.30    2.60
   5  -3   9   41.70    3.00
  -5   3  -9   48.80    3.20
   5  -3  10   -0.20    1.80
  -5   3 -10    1.40    1.90
   5  -3  11  120.70    5.50
  -5   3 -11  125.80    5.40
   5  -3  12   -1.10    2.60
  -5   3 -12    6.90    2.00
   5  -3  13    4.80    2.60
  -5   3 -13    8.80    2.30
   5  -3  14   11.50    3.30
  -5   3 -14   -3.00    3.60
   5  -3  15    0.50    3.90
  -5   3 -15    5.30    3.60
   5  -3  16   -0.20    4.70
  -5   3 -16    3.40    3.30
   5  -3  17   -8.80    5.50
  -5   3 -17   -0.60    3.40
   5  -3  18    0.70    5.10
  -5   3 -18    1.10    4.20
   5  -2 -20   -9.90    7.60
   5  -2 -19    7.80    4.90
   5  -2 -18    3.20    4.90
   5  -2 -17   53.50    7.90
   5  -2 -16    1.70    4.40
   5  -2 -15   16.10    4.50
   5  -2 -14   18.00    5.80
   5  -2 -13    2.30    5.80
  -5   2  13    8.30    3.80
   5  -2 -12   23.70    5.70
  -5   2  12   17.30    3.60
   5  -2 -11   58.80    7.00
  -5   2  11   44.20    5.60
   5  -2 -10    7.80    3.40
  -5   2  10   13.20    3.30
   5  -2  -9   86.90    4.60
  -5   2   9   88.90    7.30
   5  -2  -8   52.30    3.70
  -5   2   8   58.10    4.20
   5  -2  -7   25.50    2.60
  -5   2   7   41.00    3.70
   5  -2  -6   19.30    2.80
  -5   2   6   25.20    3.80
   5  -2  -5    1.90    2.00
  -5   2   5    2.50    1.60
   5  -2  -4  449.90   13.90
  -5   2   4  462.30   20.50
   5  -2  -3   14.40    1.70
  -5   2   3   12.90    2.00
   5  -2  -2    0.30    2.60
  -5   2   2   -0.10    0.90
   5  -2  -1   21.40    3.00
  -5   2   1   19.70    1.50
   5  -2   0    6.00    2.10
  -5   2   0    5.90    1.00
   5  -2   1    0.40    1.90
  -5   2  -1    1.80    0.80
   5  -2   2   31.10    2.00
  -5   2  -2   32.90    1.60
   5  -2   3    1.10    1.10
  -5   2  -3    4.00    0.90
   5  -2   4   46.50    3.00
  -5   2  -4   52.10    2.20
   5  -2   5   11.90    1.50
  -5   2  -5   15.30    1.20
   5  -2   6    6.90    1.20
  -5   2  -6    6.60    1.40
   5  -2   7  133.50    5.00
  -5   2  -7  143.70    4.70
   5  -2   8  101.20    4.40
  -5   2  -8  113.60    4.90
   5  -2   9   13.70    2.10
  -5   2  -9   14.50    1.90
   5  -2  10  386.40   15.30
  -5   2 -10  400.10   13.50
   5  -2  11    9.60    2.10
  -5   2 -11   18.30    2.50
   5  -2  12    2.30    2.60
  -5   2 -12    4.50    2.10
   5  -2  13    3.80    2.20
  -5   2 -13    2.50    2.20
   5  -2  14   -0.60    3.10
  -5   2 -14   -1.10    2.20
   5  -2  15   -2.20    3.00
  -5   2 -15    7.50    3.70
   5  -2  16    0.80    2.90
  -5   2 -16    1.60    4.50
   5  -2  17    6.20    4.00
  -5   2 -17    5.80    5.20
   5  -2  18    2.70    5.30
  -5   2 -18    3.30    5.50
   5  -2  19   -2.20    6.00
  -5   2 -19    2.80    6.20
   5  -1 -20   16.80    8.80
   5  -1 -19   -4.60    4.90
   5  -1 -18   17.10    5.60
   5  -1 -17   10.90    6.70
   5  -1 -16   22.20    6.20
   5  -1 -15   14.40    6.10
   5  -1 -14    8.90    4.30
   5  -1 -13   83.20    8.20
  -5   1  13   62.10    6.80
   5  -1 -12    9.00    4.00
  -5   1  12    1.40    3.60
   5  -1 -11    7.90    2.90
  -5   1  11    4.10    3.00
   5  -1 -10  107.20    8.10
  -5   1  10  114.10    9.90
   5  -1  -9   -3.20    3.00
  -5   1   9    0.70    2.70
   5  -1  -8   25.10    3.70
  -5   1   8   29.60    3.40
   5  -1  -7   64.60    3.40
  -5   1   7   64.00    5.40
   5  -1  -6   11.10    1.90
  -5   1   6   11.90    2.50
   5  -1  -5    6.00    2.00
  -5   1   5    5.60    2.00
   5  -1  -4  154.40    5.40
  -5   1   4  158.10    7.20
   5  -1  -3  111.40    4.10
  -5   1   3  111.40    3.90
   5  -1  -2   16.90    3.10
  -5   1   2   24.00    1.80
   5  -1  -1    7.90    2.60
  -5   1   1    1.80    0.90
   5  -1   0    2.80    2.00
  -5   1   0    2.10    1.10
   5  -1   1   14.70    1.30
  -5   1  -1   14.80    1.80
   5  -1   2   58.00    2.40
  -5   1  -2   52.60    2.30
   5  -1   3   14.20    1.70
  -5   1  -3    6.00    1.30
   5  -1   4   30.20    2.60
  -5   1  -4   28.30    1.50
   5  -1   5    5.00    1.60
  -5   1  -5    3.90    1.10
   5  -1   6   66.90    2.80
  -5   1  -6   70.70    2.90
   5  -1   7   40.90    2.30
  -5   1  -7   39.70    2.20
   5  -1   8   43.10    2.40
  -5   1  -8   40.50    2.30
   5  -1   9    2.40    1.60
  -5   1  -9   -0.40    1.50
   5  -1  10   50.90    3.40
  -5   1 -10   57.20    3.50
   5  -1  11  291.10   12.20
  -5   1 -11  310.70   12.00
   5  -1  12   38.50    3.20
  -5   1 -12   33.10    2.90
   5  -1  13    1.50    2.00
  -5   1 -13    8.00    2.70
   5  -1  14    7.20    2.50
  -5   1 -14    7.40    2.50
   5  -1  15    2.50    2.40
  -5   1 -15    1.70    2.30
   5  -1  16    6.90    3.10
  -5   1 -16    8.50    3.20
   5  -1  17    3.30    3.50
  -5   1 -17    5.60    3.90
   5  -1  18    3.70    3.30
  -5   1 -18    1.20    3.20
   5  -1  19   -0.80    3.80
  -5   1 -19    1.20    4.70
   5   0 -19    2.70    7.90
   5   0 -18    1.50    5.10
   5   0 -17    8.10    5.80
   5   0 -16    1.20    6.60
   5   0 -15    3.30    5.80
   5   0 -14   25.00    5.10
   5   0 -13    7.70    4.20
   5   0 -12    5.20    4.10
  -5   0  12   15.30    4.30
   5   0 -11   84.60    8.20
  -5   0  11   83.10    7.40
   5   0 -10    4.80    3.00
   5   0  -9    0.40    2.90
  -5   0   9    3.60    2.60
   5   0  -8    3.00    2.90
  -5   0   8    1.10    2.40
   5   0  -7    2.90    2.80
  -5   0   7    1.70    3.30
   5   0  -6    9.40    2.60
  -5   0   6    8.90    3.40
   5   0  -5   20.30    3.90
  -5   0   5    5.90    2.30
   5   0  -4  101.40    4.60
  -5   0   4  125.60    8.40
   5   0  -3  681.70   28.20
  -5   0   3  683.60   18.70
   5   0  -2    2.80    4.30
  -5   0   2    1.90    1.50
   5   0  -1  395.20   16.10
  -5   0   1  359.50   10.20
   5   0   0   77.90    5.00
  -5   0   0   74.00    2.90
   5   0   1    8.70    1.60
  -5   0  -1    7.40    2.10
   5   0   2  940.50   21.00
  -5   0  -2  967.00   29.50
   5   0   3    0.70    1.30
  -5   0  -3    4.40    1.30
   5   0   4    6.30    1.70
  -5   0  -4    9.60    1.20
   5   0   5    2.20    2.20
  -5   0  -5    0.70    1.40
   5   0   6   44.60    3.20
  -5   0  -6   43.80    2.10
   5   0   7  245.40    7.90
  -5   0  -7  261.40    7.10
   5   0   8   27.80    2.30
  -5   0  -8   30.70    2.30
   5   0   9    3.90    1.60
  -5   0  -9    1.40    1.30
   5   0  10    0.00    1.50
  -5   0 -10    2.50    1.50
   5   0  11   11.10    2.00
  -5   0 -11    6.90    1.80
   5   0  12    2.00    1.40
  -5   0 -12   -2.00    1.60
   5   0  13   15.90    3.00
  -5   0 -13   19.10    2.60
   5   0  14    2.40    2.10
  -5   0 -14   -1.90    2.20
   5   0  15   98.50    6.50
  -5   0 -15  118.50    7.10
   5   0  16    5.70    2.80
  -5   0 -16    7.40    3.10
   5   0  17    1.30    2.40
  -5   0 -17   -3.00    4.10
   5   0  18    1.80    3.30
  -5   0 -18   -0.30    3.60
   5   0  19    1.70    2.90
  -5   0 -19   -0.10    3.90
  -5   0 -20    6.00    3.30
   5   1 -19    0.40    7.60
   5   1 -18   66.70    9.20
   5   1 -17   -7.40    4.50
   5   1 -16   39.30    6.40
   5   1 -15   30.50    6.70
   5   1 -14   10.60    4.40
   5   1 -13   27.20    4.70
   5   1 -12    1.80    4.20
  -5  -1  12    1.00    4.50
   5   1 -11   -3.80    3.50
  -5  -1  11    5.60    5.10
   5   1 -10   20.20    4.40
  -5  -1  10   18.10    3.50
   5   1  -9   -2.70    3.20
  -5  -1   9    4.80    2.60
   5   1  -8   18.90    4.70
  -5  -1   8   10.10    3.90
   5   1  -7   36.40    4.00
  -5  -1   7   39.70    4.00
   5   1  -6   62.90    5.80
  -5  -1   6   64.90    4.60
   5   1  -5   20.50    3.00
  -5  -1   5   15.40    2.60
   5   1  -4  130.40    7.30
  -5  -1   4  129.50    5.60
   5   1  -3   50.20    4.80
  -5  -1   3   31.10    2.20
   5   1  -2  160.10    9.00
  -5  -1   2  160.70    5.60
   5   1  -1    7.10    3.50
  -5  -1   1   10.30    1.80
   5   1   0  243.50    7.40
  -5  -1   0  231.90   10.40
   5   1   1   63.90    2.80
  -5  -1  -1   64.50    3.50
   5   1   2    2.20    1.30
  -5  -1  -2    3.50    1.80
   5   1   3  440.60   10.50
  -5  -1  -3  448.90   10.60
   5   1   4   -1.00    1.30
  -5  -1  -4    2.70    1.10
   5   1   5   18.10    1.70
  -5  -1  -5   21.20    1.40
   5   1   6  119.30    6.70
  -5  -1  -6  108.10    3.50
   5   1   7   21.80    3.00
  -5  -1  -7   15.30    1.90
   5   1   8   35.50    3.80
  -5  -1  -8   36.40    2.80
   5   1   9    1.00    1.50
  -5  -1  -9   -1.80    1.40
   5   1  10    4.20    1.80
  -5  -1 -10    6.00    1.70
   5   1  11   15.50    2.20
  -5  -1 -11   15.90    1.90
   5   1  12    4.70    1.70
  -5  -1 -12    3.80    1.60
   5   1  13    0.80    1.50
  -5  -1 -13    1.90    1.70
   5   1  14  124.90    8.10
  -5  -1 -14  140.60    6.00
   5   1  15    0.30    2.20
  -5  -1 -15    0.20    2.00
   5   1  16    6.50    2.70
  -5  -1 -16    4.20    2.00
   5   1  17   12.40    3.40
  -5  -1 -17    6.20    2.20
   5   1  18   -1.30    2.70
  -5  -1 -18   -0.70    3.40
   5   1  19   15.80    3.80
  -5  -1 -19   12.50    3.20
  -5  -1 -20    2.60    3.00
   5   2 -18   -2.10    7.90
   5   2 -17   40.30   10.30
   5   2 -16    4.20    5.50
   5   2 -15   14.20    4.40
   5   2 -14   -5.30    4.40
   5   2 -13   23.70    5.60
   5   2 -12   22.50    5.40
   5   2 -11   -1.40    4.90
  -5  -2  11    6.10    5.30
   5   2 -10  162.30   11.50
  -5  -2  10  157.00   11.80
   5   2  -9   89.40    7.40
  -5  -2   9   61.30    7.00
   5   2  -8   19.30    4.00
  -5  -2   8   25.00    3.80
   5   2  -7   36.80    3.90
  -5  -2   7   31.80    4.90
   5   2  -6   92.00    6.30
  -5  -2   6  114.70   10.00
   5   2  -5   17.30    4.30
  -5  -2   5   27.60    4.00
  -5  -2   4   11.90    2.10
  -5  -2   3  165.80    6.10
  -5  -2   2   13.00    2.10
   5   2  -1   17.20    3.70
  -5  -2   1   10.90    1.90
   5   2   0   22.00    2.40
  -5  -2   0   15.10    3.30
   5   2   1   81.50    3.80
  -5  -2  -1   80.00    5.30
   5   2   2  247.50    7.50
  -5  -2  -2  244.90   14.10
   5   2   3   91.40    3.00
  -5  -2  -3   91.40    4.10
   5   2   4   17.40    1.60
  -5  -2  -4   19.50    1.30
   5   2   5    1.80    1.10
  -5  -2  -5    5.40    1.20
   5   2   6  106.90    8.00
  -5  -2  -6   96.90    4.40
   5   2   7   97.20    5.60
  -5  -2  -7  108.70    3.40
   5   2   8    7.70    3.30
  -5  -2  -8    2.50    1.40
   5   2   9   19.60    1.90
  -5  -2  -9   21.50    1.60
   5   2  10   -2.30    1.40
  -5  -2 -10   -0.30    1.60
   5   2  11   47.50    2.70
  -5  -2 -11   50.60    2.60
   5   2  12    1.50    1.50
  -5  -2 -12    2.10    1.30
   5   2  13  145.00    8.10
  -5  -2 -13  150.30    5.70
   5   2  14    3.30    1.70
  -5  -2 -14    6.70    1.70
   5   2  15   16.80    2.10
  -5  -2 -15   20.00    2.40
   5   2  16    3.60    2.50
  -5  -2 -16    0.70    1.60
   5   2  17    7.50    3.30
  -5  -2 -17    0.90    1.60
   5   2  18   11.10    3.10
  -5  -2 -18   12.60    2.30
  -5  -2 -19   -1.20    2.30
  -5  -2 -20   -4.50    3.70
   5   3 -18   -0.10    6.80
   5   3 -17   -4.50    5.10
   5   3 -16   -7.80    7.10
   5   3 -15    6.10    6.70
   5   3 -14    9.10    7.30
   5   3 -13   -0.10    6.00
   5   3 -12   49.70    5.80
   5   3 -11   55.80    7.00
   5   3 -10   97.30    8.10
  -5  -3  10  111.90    8.80
   5   3  -9  188.40   10.70
  -5  -3   9  198.30   13.40
   5   3  -8  142.20   11.00
  -5  -3   8  132.00    8.50
   5   3  -7  168.60    9.40
  -5  -3   7  167.60    9.70
   5   3  -6   10.40    4.40
  -5  -3   6    7.80    3.80
  -5  -3   5  141.20    6.00
  -5  -3   4   39.90    3.10
  -5  -3   3    6.70    2.70
  -5  -3   2  206.60    7.90
  -5  -3   1   16.70    2.40
   5   3   0   20.20    2.00
  -5  -3   0   23.00    3.70
   5   3   1  362.40   11.30
  -5  -3  -1  352.00   12.80
   5   3   2    1.30    2.10
  -5  -3  -2    5.90    2.20
   5   3   3   35.40    3.20
  -5  -3  -3   41.80    4.30
   5   3   4  358.40    8.40
  -5  -3  -4  334.60   15.10
   5   3   5   30.20    1.80
  -5  -3  -5   32.40    1.70
   5   3   6  646.90   16.30
  -5  -3  -6  622.10   20.80
   5   3   7  395.80   26.60
  -5  -3  -7  408.90   14.20
   5   3   8   21.50    3.10
  -5  -3  -8   17.80    2.90
   5   3   9   96.70    5.70
  -5  -3  -9   91.40    3.20
  -5  -3 -10   14.20    1.70
   5   3  11    0.80    1.20
  -5  -3 -11    0.30    1.30
   5   3  12   37.30    2.40
  -5  -3 -12   40.80    2.40
   5   3  13   23.80    2.20
  -5  -3 -13   28.80    2.10
   5   3  14   28.80    2.70
  -5  -3 -14   32.90    2.30
   5   3  15    7.60    1.90
  -5  -3 -15   14.90    1.90
   5   3  16    8.20    2.40
  -5  -3 -16   14.10    1.90
   5   3  17   14.00    3.40
  -5  -3 -17   11.70    2.10
   5   3  18    5.70    2.70
  -5  -3 -18    3.80    2.30
  -5  -3 -19    8.00    2.90
  -5  -3 -20    6.40    3.00
  -5  -3 -21    3.50    5.80
   5   4 -17   11.40    5.80
   5   4 -16    4.50    4.60
   5   4 -15    0.10    5.30
   5   4 -14   16.50    4.90
   5   4 -13    1.20    4.20
   5   4 -12   27.00    5.00
   5   4 -11    3.80    4.00
   5   4 -10   -4.40    3.80
  -5  -4  10    5.00    5.60
   5   4  -9  294.40   15.90
  -5  -4   9  279.60   16.00
   5   4  -8  265.10   13.00
  -5  -4   8  299.20   17.70
   5   4  -7  101.80    7.60
  -5  -4   7  100.50    5.50
  -5  -4   6  180.30    7.40
  -5  -4   5   18.10    2.60
  -5  -4   4    1.50    2.00
  -5  -4   3   40.30    3.10
  -5  -4   2   42.90    3.10
  -5  -4   1  216.70    8.70
   5   4   0    6.60    2.50
  -5  -4   0    8.00    3.60
   5   4   1   78.70    5.60
  -5  -4  -1   86.60    5.60
   5   4   2   91.10    4.00
  -5  -4  -2   89.50    7.50
   5   4   3   22.80    2.50
  -5  -4  -3   34.70    3.80
   5   4   4    6.10    1.80
  -5  -4  -4   -0.40    1.90
   5   4   5   88.60    3.00
  -5  -4  -5   81.50    4.90
   5   4   6   20.80    1.40
  -5  -4  -6   23.20    1.70
   5   4   7  133.10    4.00
  -5  -4  -7  131.40    5.20
   5   4   8    1.00    2.30
  -5  -4  -8   -2.00    1.50
   5   4   9    2.10    2.60
  -5  -4  -9    0.70    1.80
   5   4  10   -2.60    2.50
  -5  -4 -10    3.10    1.20
   5   4  11    6.00    2.60
  -5  -4 -11   11.40    1.60
   5   4  12   16.40    4.10
  -5  -4 -12   11.50    1.60
   5   4  13   10.50    1.50
  -5  -4 -13   10.90    1.60
   5   4  14   12.50    1.70
  -5  -4 -14   14.00    1.50
   5   4  15    8.80    1.70
  -5  -4 -15    9.90    1.80
   5   4  16   47.50    5.80
  -5  -4 -16   53.80    3.00
   5   4  17    8.90    2.30
  -5  -4 -17   10.50    2.00
   5   4  18   44.20    4.20
  -5  -4 -18   38.20    4.20
  -5  -4 -19   -3.30    2.30
  -5  -4 -20    0.30    5.20
  -5  -4 -21    0.30    5.10
   5   5 -17    4.80    6.30
   5   5 -16    8.50    5.70
   5   5 -15    2.00    4.80
   5   5 -14   20.10    5.80
   5   5 -13    3.30    3.80
   5   5 -12    3.60    6.70
   5   5 -11   64.10    6.70
   5   5 -10  377.80   22.30
   5   5  -9    0.40    3.50
  -5  -5   9   -2.50    2.50
   5   5  -8   37.70    5.20
  -5  -5   8   26.10    3.90
  -5  -5   7   -0.10    2.20
  -5  -5   6   62.60    4.10
  -5  -5   5  146.40    6.30
  -5  -5   4  203.40    6.90
  -5  -5   3   11.50    2.30
  -5  -5   2   84.30    4.40
  -5  -5   1  227.00    7.00
   5   5   0  187.90    9.20
  -5  -5   0  166.30    7.90
   5   5   1    6.20    2.50
  -5  -5  -1    8.30    2.60
   5   5   2   28.50    4.10
  -5  -5  -2   11.60    2.90
   5   5   3    8.80    2.00
  -5  -5  -3   14.60    3.70
   5   5   4   27.00    2.40
  -5  -5  -4   27.30    3.60
   5   5   5    4.70    1.80
  -5  -5  -5    9.70    2.90
   5   5   6    0.30    1.00
  -5  -5  -6    5.00    3.50
   5   5   7   16.10    1.50
  -5  -5  -7   16.50    3.40
   5   5   8   36.80    3.30
  -5  -5  -8   35.70    4.40
   5   5   9   50.40    5.40
  -5  -5  -9   52.70    3.40
   5   5  10    0.70    2.60
  -5  -5 -10    4.60    2.10
   5   5  11   54.90    6.00
  -5  -5 -11   51.20    3.40
   5   5  12   12.80    4.00
  -5  -5 -12   21.70    1.70
   5   5  13    4.50    3.20
  -5  -5 -13   14.20    1.50
   5   5  14   -7.30    5.30
  -5  -5 -14   -1.50    1.20
   5   5  15   15.50    1.50
  -5  -5 -15   17.40    1.80
   5   5  16    5.10    1.40
  -5  -5 -16    3.60    1.30
   5   5  17  132.10    9.70
  -5  -5 -17  127.20    5.80
   5   5  18   53.40    3.90
  -5  -5 -18   59.50    4.60
  -5  -5 -19    5.80    2.10
  -5  -5 -20   15.90    6.50
  -5  -5 -21   -2.10    6.90
   5   6 -16   -0.60    8.50
   5   6 -15    9.60    7.30
   5   6 -14    8.70    6.70
   5   6 -13   -7.20    4.30
  -5  -6  13   -5.20    4.70
   5   6 -12    7.40    4.80
  -5  -6  12   20.90    6.40
   5   6 -11   59.20    7.50
  -5  -6  11   67.10    7.90
  -5  -6  10   -2.70    5.70
  -5  -6   9   13.50    4.50
  -5  -6   8   19.90    3.40
  -5  -6   7   87.30    5.70
  -5  -6   6    3.60    3.30
  -5  -6   5  266.20   10.00
  -5  -6   4    8.20    2.60
  -5  -6   3  138.20    5.20
  -5  -6   2   16.50    3.20
  -5  -6   1  143.50    5.10
   5   6   0   87.50    6.20
  -5  -6   0   99.80    6.40
   5   6   1   37.50    3.40
  -5  -6  -1   22.10    3.40
   5   6   2   13.60    3.10
  -5  -6  -2    6.70    2.70
   5   6   3   -0.50    2.70
  -5  -6  -3   -3.80    2.50
   5   6   4   13.00    2.50
  -5  -6  -4    1.30    2.90
   5   6   5   49.80    3.60
  -5  -6  -5   43.30    3.80
   5   6   6    0.50    1.00
  -5  -6  -6    0.50    2.70
   5   6   7    3.20    1.20
  -5  -6  -7    0.60    2.30
   5   6   8   19.60    2.00
  -5  -6  -8   17.10    3.40
   5   6   9    0.60    3.20
  -5  -6  -9   -2.70    3.10
   5   6  10    8.30    3.90
  -5  -6 -10    3.40    4.70
   5   6  11    5.80    3.10
  -5  -6 -11    2.50    3.30
   5   6  12   45.30    6.60
  -5  -6 -12   43.50    3.10
   5   6  13   -3.90    4.60
  -5  -6 -13    4.10    1.50
   5   6  14   42.10    5.50
  -5  -6 -14   38.80    2.90
  -5  -6 -15   35.40    2.10
  -5  -6 -16   29.60    1.90
  -5  -6 -17   34.10    2.50
  -5  -6 -18   93.30    6.10
  -5  -6 -19    4.30    4.00
  -5  -6 -20   -1.60    6.30
  -5  -6 -21    2.00    5.50
  -5  -7  15   -3.40    5.40
  -5  -7  14   -0.50    4.90
  -5  -7  13   -7.40    4.50
  -5  -7  12   16.00    5.70
  -5  -7  11    8.50    6.40
  -5  -7  10    5.90    3.30
  -5  -7   9   53.10    7.70
  -5  -7   8    7.00    4.20
  -5  -7   7  139.90    7.10
  -5  -7   6   45.60    4.40
  -5  -7   5   44.80    3.80
  -5  -7   4   18.60    2.90
  -5  -7   3   26.40    2.80
  -5  -7   2    9.90    3.20
  -5  -7   1    0.70    2.60
   5   7   0   33.50    5.20
  -5  -7   0   42.00    4.50
   5   7   1  459.00   21.20
  -5  -7  -1  446.20   17.10
   5   7   2   -1.60    2.40
  -5  -7  -2   -3.90    2.90
   5   7   3   87.70    5.80
  -5  -7  -3   83.90    7.20
   5   7   4   -0.80    3.20
  -5  -7  -4    4.30    3.90
   5   7   5   37.70    3.10
  -5  -7  -5   36.50    4.20
   5   7   6   76.10    4.00
  -5  -7  -6   72.60    4.40
   5   7   7    2.30    1.10
  -5  -7  -7    1.50    0.50
   5   7   8    0.70    1.00
  -5  -7  -8    0.80    3.00
   5   7   9    1.00    1.50
  -5  -7  -9    4.00    3.30
   5   7  10    5.60    3.50
  -5  -7 -10    5.40    3.00
   5   7  11    2.20    4.30
  -5  -7 -11    1.70    3.60
   5   7  12    1.40    3.40
  -5  -7 -12    1.10    4.70
   5   7  13   22.60    4.50
  -5  -7 -13    9.30    5.50
   5   7  14   76.60    8.10
  -5  -7 -14  100.70    8.40
  -5  -7 -15  166.00   14.70
  -5  -7 -16   18.00    2.20
  -5  -7 -17   56.00    3.70
  -5  -7 -18    7.80    2.00
  -5  -7 -19    1.40    4.50
  -5  -7 -20   -8.70    4.70
  -5  -7 -21   12.70    7.60
  -5  -7 -22   -6.30    6.00
  -5  -8  14   -0.60    5.80
  -5  -8  13    2.30    7.40
  -5  -8  12    5.90    7.50
  -5  -8  11   -7.50    4.60
  -5  -8  10   21.70    6.80
  -5  -8   9    5.80    4.40
  -5  -8   8   40.20    7.70
  -5  -8   7    0.90    3.70
  -5  -8   6   60.30    4.50
  -5  -8   5    0.50    2.40
  -5  -8   4    6.00    3.40
  -5  -8   3   99.60    4.80
  -5  -8   2   -1.90    3.20
  -5  -8   1   26.90    3.10
   5   8   0   53.10    4.30
  -5  -8   0   54.40    6.10
   5   8   1    3.60    2.60
  -5  -8  -1   11.80    4.80
   5   8   2  132.20    8.70
  -5  -8  -2  117.40    6.80
   5   8   3  909.30   35.10
  -5  -8  -3  911.10   31.90
   5   8   4  424.40   17.60
  -5  -8  -4  381.80   17.10
   5   8   5  296.30   13.90
  -5  -8  -5  294.10   12.80
   5   8   6    6.10    2.70
  -5  -8  -6    6.20    3.60
   5   8   7   27.80    2.60
  -5  -8  -7   25.00    4.20
   5   8   8   61.80    2.60
  -5  -8  -8   76.00    8.10
   5   8   9   22.50    2.50
  -5  -8  -9   20.90    3.80
   5   8  10   13.40    2.00
  -5  -8 -10   19.70    5.00
   5   8  11    3.10    2.90
  -5  -8 -11    0.60    3.30
   5   8  12    7.90    5.20
  -5  -8 -12    7.10    4.10
   5   8  13    2.70    5.20
  -5  -8 -13    6.10    4.40
  -5  -8 -14    0.40    3.20
  -5  -8 -15    3.90    3.40
  -5  -8 -16   49.60    7.90
  -5  -8 -17   17.40    5.60
  -5  -8 -18    8.60    4.30
  -5  -8 -19   -0.90    4.70
  -5  -8 -20   -0.50    5.20
  -5  -8 -21   18.80    5.80
  -5  -8 -22   18.10    9.40
  -5  -9  14   -4.50    7.60
  -5  -9  13    3.40    6.10
  -5  -9  12    0.70    4.50
  -5  -9  11   -3.20    4.30
  -5  -9  10   10.90    6.30
  -5  -9   9   -0.60    4.10
  -5  -9   8   -5.20    4.10
  -5  -9   7   -1.50    4.90
  -5  -9   6    8.50    5.60
  -5  -9   5   15.00    3.30
  -5  -9   4   36.50    4.20
  -5  -9   3   12.10    2.70
  -5  -9   2   48.20    4.50
  -5  -9   1   -0.90    2.90
   5   9   0   57.10    5.20
  -5  -9   0   39.90    4.50
   5   9   1   51.70    5.30
  -5  -9  -1   47.60    5.20
   5   9   2   33.60    5.70
  -5  -9  -2   41.60    5.00
   5   9   3   76.70    5.90
   5   9   4   79.20    7.10
  -5  -9  -4   86.10    6.50
   5   9   5   17.20    3.50
  -5  -9  -5   19.50    4.60
   5   9   6   50.90    5.50
  -5  -9  -6   47.60    5.10
   5   9   7   14.90    2.20
  -5  -9  -7   20.60    3.60
   5   9   8   -1.00    0.80
  -5  -9  -8   -0.70    0.70
   5   9   9   16.70    2.60
  -5  -9  -9   11.40    4.00
   5   9  10    0.20    1.40
  -5  -9 -10    0.20    3.30
   5   9  11   -4.90    4.70
  -5  -9 -11   -4.60    5.00
   5   9  12   31.00    4.70
  -5  -9 -12   27.70    5.50
   5   9  13    2.20    3.90
  -5  -9 -13   -4.60    3.80
  -5  -9 -14   13.30    6.20
  -5  -9 -15    3.40    5.50
  -5  -9 -16   10.00    5.00
  -5  -9 -17    5.50    4.40
  -5  -9 -18    8.90    6.30
  -5  -9 -19    7.40    4.80
  -5  -9 -20   -3.40    7.00
  -5  -9 -21   16.70    6.60
  -5  -9 -22   -6.70    6.10
  -5 -10  13   -3.80    6.10
  -5 -10  12    9.90    7.60
  -5 -10  11    0.00    7.10
  -5 -10  10    2.40    4.10
  -5 -10   9    9.00    6.80
  -5 -10   8   85.30    8.90
  -5 -10   7    2.10    4.10
  -5 -10   6   22.50    7.20
  -5 -10   5  143.20   11.20
  -5 -10   4   17.00    4.30
  -5 -10   3    5.50    2.80
  -5 -10   2    7.60    3.10
  -5 -10   1    9.80    3.00
   5  10   0  102.70    7.60
  -5 -10   0  111.10    5.90
   5  10   1    9.50    4.50
  -5 -10  -1   14.60    5.00
   5  10   2   53.70    5.10
  -5 -10  -2   55.30    6.60
   5  10   3  105.40    7.30
  -5 -10  -3  110.20    8.40
   5  10   4   -7.50    4.00
  -5 -10  -4   -0.80    3.60
   5  10   5  310.80   15.70
  -5 -10  -5  309.60   14.20
   5  10   6   92.20    7.30
  -5 -10  -6   70.80    7.10
   5  10   7   31.60    4.10
  -5 -10  -7   49.70    6.60
   5  10   8   76.20    4.10
  -5 -10  -8   75.70    3.20
   5  10   9   38.70    1.60
  -5 -10  -9   39.30    4.90
   5  10  10   96.70    4.40
  -5 -10 -10   86.60    7.70
   5  10  11   26.70    2.30
  -5 -10 -11   46.30    7.00
   5  10  12   27.00    6.50
  -5 -10 -12   38.80    7.00
  -5 -10 -13   22.60    6.50
  -5 -10 -14    1.60    5.30
  -5 -10 -15    4.00    3.90
  -5 -10 -16   37.00    7.30
  -5 -10 -17    2.10    4.20
  -5 -10 -18    1.20    4.50
  -5 -10 -19   14.90    6.30
  -5 -10 -20    6.50    4.90
  -5 -10 -21  -11.40    5.80
  -5 -10 -22    4.20    7.00
  -5 -11  12   -4.60    8.30
  -5 -11  11   -4.20    5.20
  -5 -11  10   14.80    8.20
  -5 -11   9    3.40    4.90
  -5 -11   8   -4.60    6.00
  -5 -11   7    7.20    3.80
  -5 -11   6   23.50    4.70
  -5 -11   5   -0.40    3.80
  -5 -11   4  196.70   12.90
  -5 -11   3   10.50    5.20
  -5 -11   2    5.70    3.70
  -5 -11   1    5.60    2.90
   5  11   0   14.80    4.10
  -5 -11   0   15.60    3.10
   5  11   1    6.80    3.60
  -5 -11  -1   25.80    4.30
   5  11   2   42.40    4.80
  -5 -11  -2   39.00    5.20
   5  11   3    0.10    3.20
  -5 -11  -3   -1.80    3.60
   5  11   4   14.70    5.80
  -5 -11  -4   -1.60    3.30
   5  11   5   -3.10    4.60
  -5 -11  -5    6.90    4.10
   5  11   6    4.80    4.00
  -5 -11  -6   -6.10    3.50
   5  11   7   35.50    5.00
  -5 -11  -7   26.90    4.60
   5  11   8   58.20    3.80
  -5 -11  -8   58.00    3.50
   5  11   9   21.30    2.60
  -5 -11  -9   23.80    1.90
   5  11  10   35.00    2.60
  -5 -11 -10   38.70    6.00
   5  11  11   72.90    4.40
  -5 -11 -11   77.30    6.20
  -5 -11 -12    0.40    4.20
  -5 -11 -13    8.80    5.80
  -5 -11 -14    7.10    5.70
  -5 -11 -15    2.60    4.20
  -5 -11 -16    7.80    5.00
  -5 -11 -17   61.50    9.70
  -5 -11 -18   18.80    6.00
  -5 -11 -19   -4.00    4.70
  -5 -11 -20   -6.80    5.50
  -5 -11 -21   -1.90    5.60
  -5 -12  10  -10.90    6.90
  -5 -12   9    0.20    4.80
  -5 -12   8   10.30    6.30
  -5 -12   7    7.20    6.80
  -5 -12   6    4.60    4.30
  -5 -12   5    1.00    4.60
  -5 -12   4   -0.90    3.80
  -5 -12   3   -0.40    4.60
  -5 -12   2   -0.50    3.90
  -5 -12   1    7.60    5.40
  -5 -12   0  146.70    7.60
   5  12   1    0.80    3.60
  -5 -12  -1    0.40    5.70
   5  12   2    1.10    3.50
  -5 -12  -2   -2.20    5.00
   5  12   3   83.30    7.70
  -5 -12  -3   76.00    7.70
   5  12   4   38.50    6.90
  -5 -12  -4   53.20    5.50
   5  12   5   69.00    7.10
  -5 -12  -5   54.60    5.40
   5  12   6   81.30    7.60
  -5 -12  -6   71.80    6.40
   5  12   7   17.40    5.90
  -5 -12  -7    8.00    2.10
   5  12   8   52.90    6.60
  -5 -12  -8   57.10    3.20
   5  12   9   11.90    2.20
  -5 -12  -9   12.50    1.90
   5  12  10   19.10    2.60
  -5 -12 -10   18.00    5.20
   5  12  11   37.20    3.20
  -5 -12 -11   32.70    5.60
   5  12  12   13.70    2.10
  -5 -12 -12   17.30    5.10
  -5 -12 -13   93.90    8.30
  -5 -12 -14    0.20    5.70
  -5 -12 -15   35.90    8.10
  -5 -12 -16    0.60    5.20
  -5 -12 -17   28.70    6.50
  -5 -12 -18   14.50    5.60
  -5 -12 -19    4.60    5.20
  -5 -12 -20    4.90    6.60
  -5 -12 -21   16.80    6.20
  -5 -13   9   17.10    9.00
  -5 -13   8    1.00    5.60
  -5 -13   7   10.60    7.30
  -5 -13   6    0.30    7.10
  -5 -13   5    3.00    4.80
  -5 -13   4   17.80    5.10
  -5 -13   3    6.00    4.40
  -5 -13   2    4.10    3.70
  -5 -13   1   14.00    6.00
  -5 -13   0   16.30    4.30
  -5 -13  -1   53.50    7.30
  -5 -13  -2   15.50    5.00
  -5 -13  -3   11.10    5.90
   5  13   4  103.60   11.10
  -5 -13  -4   99.70    8.50
   5  13   5   22.30    6.60
  -5 -13  -5   28.70    5.30
   5  13   6   -3.60    5.00
  -5 -13  -6   11.00    5.70
   5  13   7   94.10    9.20
  -5 -13  -7   96.30    5.50
  -5 -13  -8   -1.90    1.90
  -5 -13  -9   15.60    2.00
   5  13  10   13.50    0.90
  -5 -13 -10   27.10    7.10
   5  13  11    5.50    2.50
  -5 -13 -11   13.20    6.40
   5  13  12    3.80    2.20
  -5 -13 -12   15.50    7.20
  -5 -13 -13   21.40    5.20
  -5 -13 -14   39.90    6.10
  -5 -13 -15  150.40   15.30
  -5 -13 -16    8.80    4.20
  -5 -13 -17    6.70    4.70
  -5 -13 -18   13.60    8.10
  -5 -13 -19  -10.40    5.90
  -5 -13 -20   31.70    9.80
  -5 -13 -21   -0.10    6.80
  -5 -14   8    9.30    6.50
  -5 -14   7    5.70    4.90
  -5 -14   6   -5.20    6.40
  -5 -14   5   -5.10    4.80
  -5 -14   4    0.70    3.90
  -5 -14   3    3.00    4.20
  -5 -14   2    4.70    4.40
  -5 -14   1    9.80    6.10
  -5 -14   0   22.30    6.00
  -5 -14  -1    0.70    4.40
  -5 -14  -2   27.90    7.30
  -5 -14  -3   35.60    5.90
  -5 -14  -4   14.70    4.30
  -5 -14  -5    8.70    6.70
  -5 -14  -6    5.90    4.50
  -5 -14  -7   12.80    2.80
  -5 -14  -8   24.70    2.70
  -5 -14  -9   10.80    2.20
   5  14  10    2.90    1.00
  -5 -14 -10   -0.10    4.30
   5  14  11   10.50    2.90
  -5 -14 -11    7.90    4.50
   5  14  12    3.00    2.00
  -5 -14 -12    1.00    4.80
   5  14  13   24.00    2.10
  -5 -14 -13   22.40    7.70
  -5 -14 -14   -4.10    4.30
  -5 -14 -15    2.60    5.20
  -5 -14 -16   10.60    7.80
  -5 -14 -17    7.20    5.60
  -5 -14 -18    5.70    5.60
  -5 -14 -19    2.20    5.80
  -5 -14 -20   11.20    6.30
  -5 -15   7   17.30    6.40
  -5 -15   6   22.00    6.10
  -5 -15   5   15.70    8.10
  -5 -15   4   -3.30    4.40
  -5 -15   3   12.00    5.20
  -5 -15   2    2.00    4.40
  -5 -15   1   16.30    5.90
  -5 -15   0    5.10    6.00
  -5 -15  -1    1.20    3.90
  -5 -15  -2   10.30    3.90
  -5 -15  -3   15.10    7.10
  -5 -15  -4   23.90    5.20
  -5 -15  -5    8.40    4.60
  -5 -15  -6    0.90    2.10
  -5 -15  -7  127.80    7.00
  -5 -15  -8    5.00    2.00
  -5 -15  -9    6.10    2.50
   5  15  10   12.40    2.00
  -5 -15 -10   16.90    2.60
   5  15  11   10.50    2.70
  -5 -15 -11    4.00    4.30
   5  15  12    5.50    2.40
  -5 -15 -12   11.30    7.80
  -5 -15 -13    5.70    4.70
  -5 -15 -14   10.00    5.40
  -5 -15 -15    9.20    8.20
  -5 -15 -16   -5.60    5.30
  -5 -15 -17   50.70   10.00
  -5 -15 -18   40.00    9.10
  -5 -15 -19   -0.50    8.30
  -5 -15 -20   -6.00    6.10
  -5 -16   5    1.20    7.70
  -5 -16   3   10.40    5.50
  -5 -16   2   14.80    6.40
  -5 -16   1    6.60    4.80
  -5 -16   0   -8.40    6.70
  -5 -16  -1   -0.80    6.80
  -5 -16  -2   -1.20    4.30
  -5 -16  -3    3.80    4.10
  -5 -16  -4   10.90    6.40
  -5 -16  -5   -0.80    4.00
  -5 -16  -6   22.80    3.90
  -5 -16  -7   -0.40    1.90
  -5 -16  -8   57.90    4.70
  -5 -16  -9    3.10    2.60
  -5 -16 -10   17.30    2.60
  -5 -16 -11   13.80    8.10
  -5 -16 -12   -9.40    4.80
  -5 -16 -13   30.50    6.00
  -5 -16 -14   25.80    7.80
  -5 -16 -15    8.80    6.10
  -5 -16 -16   18.30    9.10
  -5 -16 -17   11.90    5.70
  -5 -16 -18   15.40    9.60
  -5 -16 -19    3.20    5.80
  -5 -17   3   -9.60    7.20
  -5 -17   2    1.90    5.60
  -5 -17   1   42.90    7.30
  -5 -17   0   -5.10    4.30
  -5 -17  -1   15.20    7.60
  -5 -17  -2   -9.40    6.10
  -5 -17  -3    8.10    5.40
  -5 -17  -4   -3.80    4.00
  -5 -17  -5   10.80    3.30
  -5 -17  -6   12.60    3.40
  -5 -17  -7   28.50    4.20
  -5 -17  -8   -0.50    2.10
  -5 -17  -9   52.10    4.40
  -5 -17 -10   22.00    2.90
  -5 -17 -11    5.10    7.30
  -5 -17 -12   14.80    6.00
  -5 -17 -13   -0.70    4.90
  -5 -17 -14    4.30    5.40
  -5 -17 -15    5.80    5.60
  -5 -17 -16    4.60    5.90
  -5 -17 -17    0.20    6.10
  -5 -17 -18   30.80    8.50
  -5 -18   1    6.10    5.70
  -5 -18   0   16.30    6.10
  -5 -18  -1   -1.60    5.30
  -5 -18  -2    8.60    7.50
  -5 -18  -3   13.40    8.20
  -5 -18  -4    4.70    2.90
  -5 -18  -5   19.00    3.90
  -5 -18  -6   -1.90    4.10
  -5 -18  -7   11.40    3.60
  -5 -18  -8   16.10    3.60
  -5 -18  -9   17.20    3.70
  -5 -18 -10    3.20    3.00
  -5 -18 -11   20.30    8.80
  -5 -18 -13    0.00    7.30
  -5 -18 -14   51.30    8.30
  -5 -18 -15   26.70    9.50
  -5 -18 -16    4.50    7.10
  -5 -18 -17    2.40   10.20
  -5 -19  -2   -0.90    4.80
  -5 -19  -3    0.80    3.30
  -5 -19  -4    1.80    3.80
  -5 -19  -5   -1.60    3.10
  -5 -19  -6    2.90    3.70
  -5 -19  -7    7.30    3.40
  -5 -19  -8   -0.80    2.70
  -5 -19  -9   -0.10    2.70
  -5 -19 -10   26.70    8.50
  -5 -19 -11    1.20    5.60
  -5 -19 -12   -1.70    5.20
  -5 -19 -13    0.00    8.30
  -5 -19 -14    3.90    6.20
  -5 -19 -15    9.00    9.40
  -5 -20  -5    0.10    4.90
  -5 -20  -6   -3.80    5.20
  -5 -20  -7   -1.20    3.00
  -5 -20  -8    1.60    3.90
  -5 -20  -9    7.60    6.10
  -5 -20 -10    2.30    8.20
  -5 -20 -11   -1.70    5.20
  -5 -20 -12   -2.80    5.80
  -6  18  10    5.80    5.30
  -6  18   9   25.90    6.30
  -6  18   8   -6.10    7.80
  -6  18   7   14.50    5.90
  -6  18   6   15.60    8.30
  -6  18   5    3.50    8.10
  -6  17  12   12.50    7.00
  -6  17  11   -3.30    6.80
  -6  17  10    7.10    7.40
  -6  17   9    6.90    7.70
  -6  17   8   16.80    6.50
  -6  17   7    7.60    5.20
  -6  17   6    6.30    6.00
  -6  17   5    1.80    7.70
  -6  17   4   22.30    9.10
  -6  17   3   16.20    8.70
  -6  17   2   -4.60    8.30
  -6  17   1   26.70    7.10
  -6  16  13   12.70    4.20
  -6  16  12    5.80    5.40
  -6  16  11    1.60    3.70
  -6  16  10    4.90    4.70
  -6  16   9    5.50    4.60
  -6  16   8   -5.40    4.50
  -6  16   7    3.50    7.00
  -6  16   5   -4.00    4.60
  -6  16   4  -14.30    6.70
  -6  16   3   -6.00    7.30
  -6  16   2    6.00    7.60
  -6  16   1    5.30    5.90
  -6  16   0    5.40    5.90
   6 -16   1   -5.70    5.60
  -6  16  -1   10.30    9.30
   6 -16   2   -2.50    8.60
  -6  16  -2   12.40    7.10
   6 -15 -17    5.80    3.00
   6 -15 -16   -0.20    2.80
   6 -15 -15   15.60    5.60
   6 -15 -14    3.20    3.20
   6 -15 -13    5.90    4.60
   6 -15 -12    0.60    3.10
  -6  15  12    6.60    5.50
   6 -15 -11    6.20    3.20
  -6  15  11    5.90    4.00
   6 -15 -10   -4.70    2.30
  -6  15  10    9.20    4.30
   6 -15  -9   12.20    2.60
  -6  15   9    8.90    4.70
  -6  15   8    4.40    4.40
  -6  15   7   17.50    5.50
  -6  15   6    3.90    6.40
  -6  15   5   -7.70    4.40
  -6  15   4   42.30    6.50
  -6  15   3   -7.50    4.70
  -6  15   2    3.50    5.20
  -6  15   1   13.50    6.00
  -6  15   0   -1.30    5.90
   6 -15   1    1.90    5.60
  -6  15  -1    5.00    7.90
   6 -15   2    8.70    7.50
  -6  15  -2    7.70    5.60
   6 -15   3    2.60    6.40
   6 -15   4    4.30    6.80
   6 -14 -18    0.10    3.00
   6 -14 -17   -0.30    3.30
   6 -14 -16    3.40    3.00
   6 -14 -15    1.30    2.40
   6 -14 -14   11.70    3.30
   6 -14 -13    3.80    2.40
   6 -14 -12    6.90    2.80
  -6  14  12    6.00    4.00
   6 -14 -11    1.10    3.00
  -6  14  11    3.20    3.90
   6 -14 -10    4.60    2.50
  -6  14  10   14.30    4.30
   6 -14  -9    5.00    2.40
  -6  14   9    5.70    6.10
   6 -14  -8    3.30    2.00
  -6  14   8    2.70    6.30
   6 -14  -7    8.90    1.80
  -6  14   7    5.80    4.40
   6 -14  -6    7.70    1.50
  -6  14   6   12.00    5.50
  -6  14   5   13.70    6.50
  -6  14   4    9.00    4.60
  -6  14   3    4.40    4.20
  -6  14   2   20.60    5.40
  -6  14   1   -2.50    4.40
  -6  14   0    2.50    4.60
   6 -14   1    5.40    5.40
  -6  14  -1   -2.50    7.00
   6 -14   2   15.70    6.10
  -6  14  -2    4.70    5.00
   6 -14   3   17.20    8.00
   6 -14   4    1.10    5.30
   6 -14   5   27.80    8.10
   6 -14   6   20.70    6.50
   6 -13 -18    1.40    4.20
   6 -13 -17   11.80    3.10
   6 -13 -16    4.60    2.80
   6 -13 -15   14.50    3.80
   6 -13 -14   -1.10    2.60
   6 -13 -13    5.30    2.90
  -6  13  13    2.40    4.50
   6 -13 -12    5.20    3.00
  -6  13  12    2.70    3.70
   6 -13 -11    0.50    2.80
  -6  13  11   -0.40    2.40
   6 -13 -10    0.70    2.70
  -6  13  10    3.00    2.30
   6 -13  -9    3.40    2.30
  -6  13   9   -1.90    2.20
   6 -13  -8    0.40    1.70
  -6  13   8   -0.20    1.70
   6 -13  -7    2.70    1.50
  -6  13   7    2.50    1.60
   6 -13  -6   12.20    1.70
  -6  13   6   13.90    1.70
   6 -13  -5    0.20    0.60
  -6  13   5    3.80    4.50
  -6  13   4   25.50    5.50
  -6  13   3   15.90    6.30
  -6  13   2   17.60    4.70
  -6  13   1   10.40    5.00
  -6  13   0    6.60    5.00
   6 -13   1   11.20    5.00
  -6  13  -1   16.70    6.40
   6 -13   2    4.20    4.50
  -6  13  -2   -7.20    4.30
   6 -13   3    3.40    5.90
   6 -13   4    7.00    7.20
   6 -13   5    6.30    5.70
   6 -13   6    1.10    7.70
   6 -13   7    9.40    6.20
   6 -12 -19    6.60    3.20
   6 -12 -18    6.30    3.70
   6 -12 -17   17.50    3.60
   6 -12 -16   11.70    4.20
   6 -12 -15   66.20    5.30
   6 -12 -14   23.10    3.20
  -6  12  14   23.00    5.70
   6 -12 -13    9.40    2.90
  -6  12  13    2.60    4.50
   6 -12 -12    3.70    2.10
  -6  12  12    8.70    3.00
   6 -12 -11    4.10    1.90
  -6  12  11    5.70    2.60
   6 -12 -10    5.50    2.00
  -6  12  10    5.80    2.60
   6 -12  -9    4.50    2.20
  -6  12   9    6.00    2.10
   6 -12  -8   31.10    4.10
  -6  12   8   36.10    3.30
   6 -12  -7   -0.80    1.50
  -6  12   7    0.70    1.50
   6 -12  -6    5.50    1.50
  -6  12   6    4.90    1.40
   6 -12  -5   32.70    2.60
  -6  12   5   37.00    2.30
  -6  12   4   18.10    5.70
  -6  12   3   22.20    5.40
  -6  12   2   14.50    4.70
  -6  12   1   33.60    6.40
  -6  12   0   62.70    8.40
   6 -12   1    3.10    4.80
  -6  12  -1   -4.60    4.50
   6 -12   2    9.00    4.30
  -6  12  -2    6.20    4.50
   6 -12   3   25.40    6.10
   6 -12   4   -3.00    6.60
   6 -12   5    0.60    5.40
   6 -12   6   46.70    6.90
   6 -12   7    8.40    8.60
   6 -12   8   -1.40    4.80
   6 -12   9   -4.20    6.00
   6 -11 -19    5.90    4.30
   6 -11 -18    2.30    3.10
   6 -11 -17   19.20    3.80
   6 -11 -16   13.30    3.00
   6 -11 -15   55.40    4.60
   6 -11 -14   21.40    3.80
  -6  11  14   14.10    4.20
   6 -11 -13    4.50    2.50
  -6  11  13   -1.30    4.50
   6 -11 -12   53.70    4.00
  -6  11  12   46.10    5.40
   6 -11 -11    0.70    1.90
  -6  11  11    2.60    2.60
   6 -11 -10   15.90    2.30
  -6  11  10   18.40    2.70
   6 -11  -9    7.90    2.00
  -6  11   9    7.90    1.90
   6 -11  -8    2.30    1.80
  -6  11   8    0.90    1.80
   6 -11  -7   40.20    2.80
  -6  11   7   34.70    3.00
   6 -11  -6    2.30    1.50
  -6  11   6   -1.80    1.10
   6 -11  -5    0.70    0.80
  -6  11   5   -0.50    1.10
  -6  11   4   32.60    4.70
  -6  11   3   13.40    3.20
  -6  11   2   -1.60    3.60
  -6  11   1   33.60    5.20
  -6  11   0   16.20    3.80
   6 -11   1   61.10    6.20
  -6  11  -1   51.30    6.50
   6 -11   2   17.00    5.10
  -6  11  -2   23.40    4.70
   6 -11   3   -2.80    4.20
   6 -11   4    7.00    6.10
   6 -11   5    1.00    4.40
   6 -11   6   10.30    5.30
   6 -11   7   14.20    6.90
   6 -11   8   12.80    5.60
   6 -11   9   -4.10    7.40
   6 -11  10   16.90    6.20
   6 -10 -20   -1.10    3.60
   6 -10 -19    1.60    3.50
   6 -10 -18    7.60    3.60
   6 -10 -17    7.80    3.20
   6 -10 -16   42.90    4.00
   6 -10 -15    3.10    2.70
   6 -10 -14   11.60    2.80
  -6  10  14    7.60    5.50
   6 -10 -13    7.50    2.30
  -6  10  13   10.00    3.10
   6 -10 -12    1.60    1.90
  -6  10  12   -0.40    3.80
   6 -10 -11    4.30    2.50
  -6  10  11    6.90    3.30
   6 -10 -10    4.90    2.40
  -6  10  10   10.90    2.50
   6 -10  -9   -0.50    1.60
  -6  10   9   -0.80    2.10
   6 -10  -8   46.40    3.40
  -6  10   8   42.70    2.90
   6 -10  -7  109.70    5.30
  -6  10   7  108.50    4.40
   6 -10  -6   79.50    4.20
  -6  10   6   79.60    4.20
   6 -10  -5   16.00    1.60
  -6  10   5   21.10    1.60
  -6  10   4    7.00    2.80
  -6  10   3   39.40    3.30
  -6  10   2   -2.50    2.60
  -6  10   1   12.90    3.20
  -6  10   0   14.90    4.00
  -6  10  -1   -0.90    5.30
   6 -10   2    2.40    5.00
  -6  10  -2   15.40    5.50
   6 -10   3   35.10    7.20
  -6  10  -3   34.60    5.40
   6 -10   4    6.00    5.50
   6 -10   5   25.00    6.70
   6 -10   6   66.30    7.00
   6 -10   7    6.90    4.80
   6 -10   8    7.70    6.70
   6 -10   9   -0.20    4.10
   6 -10  10   21.40    6.00
   6 -10  11   20.10    7.50
   6  -9 -20    4.50    7.10
   6  -9 -19   -4.90    4.10
   6  -9 -18   28.30    6.90
   6  -9 -17   60.80    6.90
   6  -9 -16   17.90    2.40
   6  -9 -15    4.80    2.20
   6  -9 -14    2.60    1.90
  -6   9  14    0.50    3.00
   6  -9 -13    7.30    1.90
  -6   9  13    9.10    3.10
   6  -9 -12   14.00    2.20
  -6   9  12   16.20    4.20
   6  -9 -11   17.50    3.30
  -6   9  11   27.30    4.30
   6  -9 -10   21.80    2.60
  -6   9  10   28.60    4.30
   6  -9  -9   48.70    3.50
  -6   9   9   50.50    3.10
   6  -9  -8    1.90    2.00
  -6   9   8    2.50    1.70
   6  -9  -7   43.90    2.90
  -6   9   7   39.40    2.30
   6  -9  -6   44.10    2.80
  -6   9   6   47.40    2.70
   6  -9  -5   36.40    2.20
  -6   9   5   39.00    2.10
   6  -9  -4   46.50    2.20
  -6   9   4   51.00    2.60
  -6   9   3   13.10    3.30
  -6   9   2   15.10    2.20
  -6   9   1   25.30    3.40
  -6   9   0   -1.00    2.50
  -6   9  -1   14.80    2.90
   6  -9   2   49.60    6.00
  -6   9  -2   48.90    3.70
   6  -9   3   62.60    6.00
  -6   9  -3   62.00    6.70
   6  -9   4   31.00    6.10
   6  -9   5   78.10    7.40
   6  -9   6   13.20    4.10
   6  -9   7    1.60    0.90
   6  -9   8   20.60    2.50
   6  -9   9   -8.70    4.10
   6  -9  10    8.80    6.40
   6  -9  11   10.90    5.50
   6  -9  12   -2.60    4.60
   6  -8 -20   -4.20    5.60
   6  -8 -19    4.70    5.40
   6  -8 -18    5.90    6.50
   6  -8 -17    4.30    3.70
   6  -8 -16   15.10    3.30
   6  -8 -15    8.20    2.90
   6  -8 -14    5.10    2.20
  -6   8  14    2.80    4.60
   6  -8 -13   14.80    2.00
  -6   8  13   19.10    5.40
   6  -8 -12   59.80    3.40
  -6   8  12   66.20    6.40
   6  -8 -11    0.70    1.40
  -6   8  11    2.60    2.80
   6  -8 -10  100.30    3.90
  -6   8  10  102.50    6.30
   6  -8  -9   15.50    2.10
  -6   8   9   16.10    3.60
   6  -8  -8  141.30    6.00
  -6   8   8  135.80    6.30
   6  -8  -7   37.90    3.10
  -6   8   7   35.70    2.80
   6  -8  -6   22.00    2.20
  -6   8   6   21.60    2.00
   6  -8  -5   66.70    3.50
  -6   8   5   66.10    3.00
   6  -8  -4    0.00    0.90
  -6   8   4    1.80    0.90
   6  -8  -3    8.80    3.20
  -6   8   3    6.80    2.40
  -6   8   2   28.90    2.50
  -6   8   1    8.80    2.70
  -6   8   0  129.30    6.30
  -6   8  -1    7.00    2.90
  -6   8  -2    8.10    2.30
   6  -8   3   78.30    7.30
  -6   8  -3   83.00    5.20
   6  -8   4    1.00    3.50
  -6   8  -4    1.60    2.60
   6  -8   5    2.80    3.60
   6  -8   6   41.30    1.80
   6  -8   7    9.50    1.20
   6  -8   8    0.80    1.00
   6  -8   9    3.40    1.80
   6  -8  10   -3.10    2.00
   6  -8  11   -2.10    4.20
   6  -8  12    6.00    7.50
   6  -8  13   17.00    7.40
   6  -7 -20   -9.50    6.50
   6  -7 -19    9.00    5.90
   6  -7 -18    2.60    4.60
   6  -7 -17   -1.50    2.30
   6  -7 -16    5.50    3.60
   6  -7 -15    0.80    2.40
   6  -7 -14   -0.40    1.80
  -6   7  14    8.50    4.70
   6  -7 -13   18.00    3.40
  -6   7  13    7.40    3.50
   6  -7 -12   10.10    2.70
  -6   7  12   15.10    4.10
   6  -7 -11   29.00    2.90
  -6   7  11   35.20    5.10
   6  -7 -10   13.70    2.20
  -6   7  10   15.10    4.00
   6  -7  -9   23.80    2.10
  -6   7   9   14.90    2.60
   6  -7  -8    0.70    1.40
  -6   7   8   -2.80    2.40
   6  -7  -7  110.30    3.90
  -6   7   7  109.10    5.40
   6  -7  -6   37.80    2.90
  -6   7   6   43.40    2.40
   6  -7  -5   36.10    2.20
  -6   7   5   40.70    2.20
   6  -7  -4   95.60    4.00
  -6   7   4   84.80    3.60
   6  -7  -3   20.50    3.80
  -6   7   3   18.30    0.90
   6  -7  -2   -6.20    3.00
  -6   7   2   -5.50    4.40
  -6   7   1  141.80    4.90
  -6   7   0   17.90    2.20
  -6   7  -1   -0.60    2.10
  -6   7  -2    1.50    2.70
   6  -7   3   49.50    5.40
  -6   7  -3   48.40    4.10
   6  -7   4   25.40    5.20
  -6   7  -4   26.70    3.40
   6  -7   5   -4.10    3.40
  -6   7  -5    2.90    3.00
   6  -7   6    0.90    0.60
  -6   7  -6    0.80    5.10
   6  -7   7  231.10    7.70
   6  -7   8    4.20    2.00
  -6   7  -8    8.10    1.80
   6  -7   9    7.30    1.90
  -6   7  -9    4.70    2.00
   6  -7  10   77.20    9.70
  -6   7 -10   72.30    6.70
   6  -7  11    5.10    3.80
  -6   7 -11    6.60    2.80
   6  -7  12   -1.00    6.30
  -6   7 -12    3.20    2.30
   6  -7  13    3.10    4.10
   6  -7  14    7.60    5.00
   6  -6 -20    5.10    6.20
   6  -6 -19   14.30    5.60
   6  -6 -18   -1.10    5.10
   6  -6 -17   -3.90    2.70
   6  -6 -16    3.60    3.50
   6  -6 -15    1.90    2.70
   6  -6 -14    0.80    1.90
   6  -6 -13    1.40    2.20
  -6   6  13    4.00    3.30
   6  -6 -12    6.80    2.50
  -6   6  12    9.10    3.20
   6  -6 -11   17.90    2.50
  -6   6  11   17.30    4.50
   6  -6 -10    3.50    2.60
  -6   6  10    4.70    3.70
   6  -6  -9   52.10    4.10
  -6   6   9   52.10    5.30
   6  -6  -8   16.90    2.50
  -6   6   8   17.50    3.10
   6  -6  -7    4.60    1.70
  -6   6   7    4.30    2.00
   6  -6  -6   46.00    2.30
  -6   6   6   46.50    3.00
   6  -6  -5   33.10    2.20
  -6   6   5   29.00    2.10
   6  -6  -4   17.70    2.40
  -6   6   4   20.30    1.70
   6  -6  -3   45.80    4.90
  -6   6   3   52.80    1.90
   6  -6  -2  103.40    5.80
  -6   6   2   83.50    4.80
   6  -6  -1    8.80    4.00
  -6   6   1    9.90    3.00
  -6   6   0    0.40    1.60
  -6   6  -1   20.50    2.10
  -6   6  -2   13.00    2.80
  -6   6  -3   32.70    3.90
   6  -6   4   36.50    4.80
  -6   6  -4   37.40    3.70
   6  -6   5   13.60    0.90
  -6   6  -5    7.60    2.70
   6  -6   6  288.40   14.10
  -6   6  -6  284.10   10.10
   6  -6   7   45.80    3.10
  -6   6  -7   43.60    2.50
   6  -6   8   43.60    3.30
  -6   6  -8   45.00    3.60
   6  -6   9   -0.80    1.70
  -6   6  -9    0.00    1.40
   6  -6  10    3.50    2.10
  -6   6 -10    3.60    2.50
   6  -6  11    9.90    2.70
  -6   6 -11    7.60    3.00
   6  -6  12    1.80    3.60
  -6   6 -12    5.50    3.50
   6  -6  13   -4.20    3.40
  -6   6 -13    2.20    3.40
   6  -6  14    9.60    4.90
  -6   6 -14    1.10    3.60
   6  -6  15   -2.60    6.40
   6  -5 -20    3.60    5.80
   6  -5 -19   22.90    7.60
   6  -5 -18    1.30    5.90
   6  -5 -17   -0.70    3.20
   6  -5 -16   10.30    2.60
   6  -5 -15    6.80    3.30
   6  -5 -14    3.40    2.00
   6  -5 -13   15.90    2.80
  -6   5  13    7.60    3.70
   6  -5 -12    0.90    2.30
  -6   5  12   -1.70    4.20
   6  -5 -11    5.40    2.40
  -6   5  11    3.50    2.90
   6  -5 -10   41.30    3.60
  -6   5  10   39.00    4.40
   6  -5  -9   20.20    2.70
  -6   5   9   15.30    3.50
   6  -5  -8    5.50    1.90
  -6   5   8    1.10    1.70
   6  -5  -7    4.40    1.70
  -6   5   7    8.40    2.30
   6  -5  -6  267.90    7.80
  -6   5   6  280.50   15.30
   6  -5  -5   49.10    2.60
  -6   5   5   48.70    2.80
   6  -5  -4   -0.20    1.00
  -6   5   4   -0.60    1.20
   6  -5  -3   54.30    3.50
  -6   5   3   60.40    2.10
   6  -5  -2   26.90    3.50
  -6   5   2   20.90    1.00
   6  -5  -1   12.40    3.50
  -6   5   1    5.80    1.80
   6  -5   0  113.90    7.80
  -6   5   0  124.70    5.70
  -6   5  -1   13.50    1.90
  -6   5  -2  332.60   10.20
  -6   5  -3   32.00    3.30
   6  -5   4   31.40    3.90
  -6   5  -4   26.40    3.10
   6  -5   5   67.40    3.40
  -6   5  -5   64.40    2.40
   6  -5   6   28.00    2.20
  -6   5  -6   25.70    1.70
   6  -5   7  386.40   15.10
  -6   5  -7  360.90   12.90
   6  -5   8   -3.10    1.60
  -6   5  -8    0.70    1.40
   6  -5   9    1.70    1.80
  -6   5  -9    0.00    1.30
   6  -5  10   11.00    2.40
  -6   5 -10   14.30    2.50
   6  -5  11    6.20    2.90
  -6   5 -11    1.50    2.60
   6  -5  12    8.80    2.60
  -6   5 -12    9.50    3.40
   6  -5  13    8.50    3.90
  -6   5 -13    1.60    2.20
   6  -5  14   -4.00    5.50
  -6   5 -14   -2.70    3.60
  -6   5 -15    6.40    3.20
   6  -5  16    9.90    5.90
   6  -4 -20    0.90    5.70
   6  -4 -19    1.00    6.10
   6  -4 -18    2.70    4.50
   6  -4 -17    6.00    2.90
   6  -4 -16   -3.30    3.20
   6  -4 -15    4.40    3.00
   6  -4 -14    5.10    2.70
   6  -4 -13    5.20    2.70
  -6   4  13   10.10    3.60
   6  -4 -12   28.10    3.80
  -6   4  12   25.90    5.20
   6  -4 -11    5.60    3.00
  -6   4  11    2.60    3.00
   6  -4 -10   -0.50    1.80
  -6   4  10   -2.90    2.50
   6  -4  -9    7.00    2.80
  -6   4   9   -2.10    2.20
   6  -4  -8   96.90    4.80
  -6   4   8   92.40    6.60
   6  -4  -7    8.20    1.90
  -6   4   7    9.10    2.60
   6  -4  -6   49.60    2.90
  -6   4   6   47.90    3.40
   6  -4  -5    4.10    1.60
  -6   4   5   -1.00    2.00
   6  -4  -4  108.60    3.50
  -6   4   4  107.80    4.60
   6  -4  -3    3.70    2.00
  -6   4   3    3.10    1.00
   6  -4  -2   89.30    3.80
  -6   4   2   85.40    2.60
   6  -4  -1    8.50    3.90
  -6   4   1    7.60    0.80
   6  -4   0   14.90    3.70
  -6   4   0   10.50    0.60
   6  -4   1    1.30    2.80
  -6   4  -1   -3.00    1.50
  -6   4  -2   21.10    2.40
  -6   4  -3  316.20   11.70
   6  -4   4    3.20    1.00
  -6   4  -4    2.90    0.70
   6  -4   5    5.50    1.40
  -6   4  -5    4.00    1.10
   6  -4   6    6.40    1.40
  -6   4  -6    7.40    1.40
   6  -4   7   34.10    2.50
  -6   4  -7   34.10    2.10
   6  -4   8  134.60    6.20
  -6   4  -8  143.50    5.50
   6  -4   9    5.30    2.10
  -6   4  -9    6.20    1.90
   6  -4  10    0.70    2.30
  -6   4 -10    7.00    2.00
   6  -4  11   19.70    2.60
  -6   4 -11   27.20    3.40
   6  -4  12    1.90    2.80
  -6   4 -12    1.60    2.30
   6  -4  13    2.10    2.00
  -6   4 -13    5.20    3.70
   6  -4  14    3.60    4.90
  -6   4 -14    6.00    4.50
   6  -4  15    0.70    5.70
  -6   4 -15    1.90    3.20
   6  -4  16    3.40    4.00
  -6   4 -16    0.60    3.40
   6  -4  17   -0.90    4.80
   6  -3 -20   10.60    5.50
   6  -3 -19    1.30    5.70
   6  -3 -18    4.40    7.60
   6  -3 -17   18.50    5.40
   6  -3 -16   -0.50    2.70
   6  -3 -15    7.80    3.10
   6  -3 -14   66.00    4.90
   6  -3 -13    1.90    2.40
  -6   3  13    0.30    5.00
   6  -3 -12   -1.30    2.50
  -6   3  12    1.90    2.90
   6  -3 -11   -1.00    2.50
  -6   3  11    6.80    3.10
   6  -3 -10   11.20    2.70
  -6   3  10    3.00    2.80
   6  -3  -9    5.70    2.50
  -6   3   9   -3.00    2.30
   6  -3  -8   25.50    3.00
  -6   3   8   16.90    3.70
   6  -3  -7   19.60    2.40
  -6   3   7   24.00    3.50
   6  -3  -6   38.80    3.10
  -6   3   6   45.50    4.00
   6  -3  -5   12.60    2.20
  -6   3   5    4.40    2.70
   6  -3  -4    8.70    1.60
  -6   3   4    5.40    1.50
   6  -3  -3    8.00    2.10
  -6   3   3    2.70    1.00
   6  -3  -2    3.50    1.80
  -6   3   2    5.20    1.00
   6  -3  -1   50.90    3.20
  -6   3   1   56.30    2.30
   6  -3   0    2.10    1.70
  -6   3   0    1.10    0.60
   6  -3   1   27.80    4.80
  -6   3  -1   20.80    1.00
   6  -3   2   10.90    2.70
  -6   3  -2    5.60    0.60
   6  -3   3   49.70    3.10
  -6   3  -3   48.90    1.70
   6  -3   4   11.80    1.50
  -6   3  -4   11.00    1.20
   6  -3   5    6.00    1.50
  -6   3  -5    5.00    1.10
   6  -3   6    0.80    1.30
  -6   3  -6    5.40    1.40
   6  -3   7   53.90    3.20
  -6   3  -7   49.50    2.50
   6  -3   8    3.10    1.60
  -6   3  -8    2.30    1.50
   6  -3   9    2.20    1.90
  -6   3  -9    1.80    1.70
   6  -3  10   42.80    3.20
  -6   3 -10   48.60    3.00
   6  -3  11    0.40    1.50
  -6   3 -11    3.00    1.70
   6  -3  12    0.90    2.10
  -6   3 -12    0.30    2.20
   6  -3  13   19.40    3.40
  -6   3 -13   17.20    4.40
   6  -3  14    0.90    3.40
  -6   3 -14    3.80    2.90
   6  -3  15   -7.00    4.70
  -6   3 -15   -0.90    2.60
   6  -3  16    8.90    4.00
  -6   3 -16   -2.20    3.10
   6  -3  17    0.10    3.50
  -6   3 -17    4.20    3.60
   6  -2 -19   -4.50    5.00
   6  -2 -18    0.40    7.10
   6  -2 -17    6.10    4.90
   6  -2 -16    2.40    5.10
   6  -2 -15   -9.90    4.70
   6  -2 -14    4.30    4.90
   6  -2 -13   23.20    3.20
   6  -2 -12   15.20    3.10
  -6   2  12   11.60    3.40
   6  -2 -11   16.50    3.00
  -6   2  11   13.70    3.70
   6  -2 -10    4.60    2.40
  -6   2  10    8.00    2.90
   6  -2  -9    8.30    2.50
  -6   2   9    2.20    2.50
   6  -2  -8   30.80    2.80
  -6   2   8   21.40    3.80
   6  -2  -7  142.40    5.90
  -6   2   7  146.10    8.60
   6  -2  -6    9.10    2.60
  -6   2   6   11.40    3.30
   6  -2  -5  149.70    5.80
  -6   2   5  156.70    7.70
   6  -2  -4    6.40    1.90
  -6   2   4    8.40    2.50
   6  -2  -3   62.00    5.50
  -6   2   3   71.90    3.20
   6  -2  -2   64.30    3.30
  -6   2   2   52.40    2.40
   6  -2  -1    5.30    2.40
  -6   2   1    5.50    1.00
   6  -2   0   17.60    2.30
  -6   2   0   17.40    1.30
   6  -2   1    2.00    2.00
  -6   2  -1    0.30    0.80
   6  -2   2    5.70    1.20
  -6   2  -2    5.00    1.10
   6  -2   3  322.70   10.00
  -6   2  -3  312.00    7.10
   6  -2   4   82.90    5.20
  -6   2  -4   84.80    2.60
   6  -2   5    5.80    1.50
  -6   2  -5    6.20    1.10
   6  -2   6   11.80    2.40
  -6   2  -6   12.30    1.50
   6  -2   7  248.20    8.80
  -6   2  -7  245.30    7.50
   6  -2   8  146.70    6.20
  -6   2  -8  134.90    4.60
   6  -2   9   28.70    2.90
  -6   2  -9   24.60    2.20
   6  -2  10   27.90    2.60
  -6   2 -10   29.90    2.50
   6  -2  11   34.70    2.60
  -6   2 -11   41.80    3.00
   6  -2  12   17.40    2.00
  -6   2 -12   13.40    2.20
   6  -2  13    1.10    3.10
  -6   2 -13    3.10    1.80
   6  -2  14   18.80    3.20
  -6   2 -14   16.50    3.10
   6  -2  15    3.30    2.70
  -6   2 -15    1.60    2.30
   6  -2  16    2.50    3.30
  -6   2 -16    3.00    3.00
   6  -2  17    2.30    3.00
  -6   2 -17    0.30    2.60
   6  -2  18   -0.90    3.40
  -6   2 -18    0.30    3.10
   6  -1 -19   -4.90    6.00
   6  -1 -18    6.70    8.10
   6  -1 -17   26.50    8.40
   6  -1 -16    0.40    4.40
   6  -1 -15   24.30    5.90
   6  -1 -14   12.80    4.60
   6  -1 -13   13.20    4.50
   6  -1 -12   13.10    4.30
  -6   1  12   10.50    5.00
   6  -1 -11   18.00    5.40
  -6   1  11    9.70    5.00
   6  -1 -10    0.30    3.10
  -6   1  10   -0.40    3.80
   6  -1  -9   24.90    3.40
  -6   1   9   17.40    3.70
   6  -1  -8    1.80    1.90
   6  -1  -7   14.90    2.10
  -6   1   7   10.10    3.70
   6  -1  -6  270.20   10.10
  -6   1   6  284.70   13.30
   6  -1  -5    4.00    2.10
  -6   1   5    6.30    3.00
   6  -1  -4   50.80    5.50
  -6   1   4   59.00    3.30
   6  -1  -3    1.70    4.10
  -6   1   3    1.50    1.40
   6  -1  -2   47.70    5.80
  -6   1   2   55.90    2.90
   6  -1  -1  120.40    5.40
  -6   1   1  131.90    4.10
   6  -1   0   58.80    3.10
  -6   1   0   54.80    2.50
   6  -1   1   64.70    2.80
  -6   1  -1   56.70    2.70
   6  -1   2   21.70    1.40
  -6   1  -2   20.60    1.70
   6  -1   3   41.50    2.70
  -6   1  -3   43.10    2.00
   6  -1   4    0.40    1.40
  -6   1  -4   -0.20    1.10
   6  -1   5    3.40    1.80
  -6   1  -5    2.40    1.50
   6  -1   6   23.50    3.00
  -6   1  -6   25.20    1.90
   6  -1   7   42.70    3.80
  -6   1  -7   44.30    2.40
   6  -1   8   74.70    3.70
  -6   1  -8   76.30    3.50
   6  -1   9   35.60    2.80
  -6   1  -9   29.30    2.50
   6  -1  10   38.30    2.90
  -6   1 -10   40.50    2.90
   6  -1  11    8.60    2.00
  -6   1 -11    9.00    1.90
   6  -1  12   32.70    3.10
  -6   1 -12   32.20    2.70
   6  -1  13   50.60    4.00
  -6   1 -13   57.90    3.60
   6  -1  14   41.20    3.60
  -6   1 -14   37.70    3.40
   6  -1  15    1.50    3.00
  -6   1 -15    3.70    3.00
   6  -1  16   12.00    4.40
  -6   1 -16   11.70    3.20
   6  -1  17    1.70    2.70
  -6   1 -17   -5.40    2.60
   6  -1  18    1.80    3.20
  -6   1 -18    0.90    2.40
  -6   1 -19    7.70    3.60
   6   0 -19   -1.20    5.20
   6   0 -18   -5.90    5.50
   6   0 -17    7.90    7.80
   6   0 -16   -2.20    6.70
   6   0 -15   43.10    6.30
   6   0 -14   16.50    6.30
   6   0 -13   36.00    5.80
   6   0 -12   23.60    6.80
   6   0 -11   96.20    7.50
  -6   0  11  116.10    9.20
   6   0 -10  208.30   11.40
  -6   0  10  179.20   12.10
   6   0  -9    9.60    4.00
  -6   0   9    5.30    4.20
   6   0  -8    7.20    4.40
  -6   0   8    7.20    3.00
   6   0  -7    8.10    2.60
  -6   0   7    8.90    3.00
   6   0  -6    2.10    1.90
  -6   0   6    3.30    2.10
   6   0  -5    5.00    2.40
  -6   0   5    4.80    2.30
   6   0  -4   47.50    4.40
  -6   0   4   49.70    3.10
   6   0  -3   12.10    4.80
  -6   0   3    3.80    1.50
   6   0  -2  110.00    7.20
  -6   0   2  120.70    4.20
   6   0  -1   84.80    6.50
  -6   0   1   84.50    3.60
   6   0   0    1.80    2.70
  -6   0   0    3.80    1.40
   6   0   1  320.90    8.80
  -6   0  -1  308.40   10.30
   6   0   2    8.90    1.60
  -6   0  -2    9.80    1.70
   6   0   3   86.80    2.90
  -6   0  -3   83.40    3.20
   6   0   4  337.50   12.10
  -6   0  -4  322.80    8.20
   6   0   5    8.10    1.70
  -6   0  -5    5.50    1.40
   6   0   6   -0.30    2.30
  -6   0  -6    0.40    1.50
   6   0   7    4.60    2.40
  -6   0  -7    3.20    1.30
   6   0   8   38.80    3.60
  -6   0  -8   41.00    2.40
   6   0   9   95.30    4.80
  -6   0  -9  110.50    4.10
   6   0  10    2.10    2.20
  -6   0 -10    3.90    1.90
   6   0  11   31.40    2.50
  -6   0 -11   35.80    2.60
   6   0  12   -2.70    1.90
  -6   0 -12    4.60    1.70
   6   0  13   27.00    3.20
  -6   0 -13   26.40    2.30
   6   0  14   84.30    6.10
  -6   0 -14  108.60    5.30
   6   0  15    6.40    3.10
  -6   0 -15   -0.20    1.90
   6   0  16   -1.80    2.60
  -6   0 -16    0.00    1.90
   6   0  17   10.60    4.30
  -6   0 -17   14.40    3.20
  -6   0 -18   -1.90    2.80
  -6   0 -19    4.20    4.40
   6   1 -18   11.10    5.00
   6   1 -17   54.80    8.80
   6   1 -16   15.00    7.70
   6   1 -15    7.10    6.50
   6   1 -14   -5.10    6.60
   6   1 -13   47.20    7.20
   6   1 -12   28.20    4.60
   6   1 -11    1.40    3.90
  -6  -1  11   -2.10    3.70
   6   1 -10    0.70    4.60
  -6  -1  10    3.40    3.70
   6   1  -9   49.20    5.90
  -6  -1   9   47.80    6.10
   6   1  -8  138.00    9.10
  -6  -1   8  161.20   10.40
   6   1  -7   91.50    7.00
  -6  -1   7   69.50    6.40
  -6  -1   6   -2.40    3.70
  -6  -1   5   12.70    2.70
   6   1  -4   -0.40    3.00
  -6  -1   4   -0.70    2.30
   6   1  -3  335.40   16.60
  -6  -1   3  309.40    9.70
   6   1  -2   23.00    3.50
  -6  -1   2   18.40    2.20
   6   1  -1   26.50    3.50
  -6  -1   1   22.20    1.80
   6   1   0  609.00   33.90
  -6  -1   0  587.70   17.30
   6   1   1    1.50    1.50
  -6  -1  -1    6.40    2.80
   6   1   2   47.10    2.10
  -6  -1  -2   46.50    3.30
   6   1   3   94.50    3.10
  -6  -1  -3   93.60    4.70
   6   1   4   19.40    1.80
  -6  -1  -4   23.90    1.60
   6   1   5   23.10    2.10
  -6  -1  -5   33.30    2.20
   6   1   6    1.60    1.90
  -6  -1  -6    0.60    1.70
   6   1   7   35.90    3.70
  -6  -1  -7   38.20    2.10
   6   1   8   12.50    3.10
  -6  -1  -8    6.70    1.40
   6   1   9   23.50    3.50
  -6  -1  -9   20.80    1.90
   6   1  10    1.10    1.30
  -6  -1 -10   -1.10    1.80
   6   1  11   23.80    2.10
  -6  -1 -11   18.60    2.40
   6   1  12   83.40    4.50
  -6  -1 -12   87.60    4.00
   6   1  13    1.20    1.80
  -6  -1 -13    2.90    1.80
   6   1  14   11.60    2.20
  -6  -1 -14   17.20    2.00
   6   1  15    3.10    2.80
  -6  -1 -15    5.90    2.70
   6   1  16    0.60    2.70
  -6  -1 -16    0.50    1.90
   6   1  17    2.00    3.30
  -6  -1 -17    3.90    2.40
  -6  -1 -18    6.80    3.70
  -6  -1 -19    3.80    3.90
   6   2 -18    4.90    6.40
   6   2 -17   -3.70    4.60
   6   2 -16   64.90    8.80
   6   2 -15    8.40    4.50
   6   2 -14    6.00    4.50
   6   2 -13   10.80    4.60
   6   2 -12   -2.10    3.70
   6   2 -11    7.20    6.20
   6   2 -10   14.80    5.30
  -6  -2  10    7.90    5.10
   6   2  -9   79.20    7.50
  -6  -2   9   77.10    6.80
   6   2  -8   19.10    3.80
  -6  -2   8   19.30    5.00
   6   2  -7  340.40   18.20
  -6  -2   7  317.70   16.60
   6   2  -6   31.90    3.90
  -6  -2   6   27.90    2.70
  -6  -2   5   83.00    4.10
  -6  -2   4   68.20    3.60
   6   2  -3    7.20    4.80
  -6  -2   3    8.40    3.00
   6   2  -2   15.00    4.60
  -6  -2   2   -1.20    1.60
   6   2  -1   -1.80    3.20
  -6  -2   1   -1.60    1.40
   6   2   0   16.60    2.50
  -6  -2   0   16.90    2.10
   6   2   1   43.40    2.90
  -6  -2  -1   46.00    4.90
   6   2   2   28.10    2.40
  -6  -2  -2   21.30    3.50
   6   2   3   51.10    2.60
  -6  -2  -3   56.20    3.00
   6   2   4   28.30    1.90
  -6  -2  -4   32.30    1.90
   6   2   5   77.30    3.10
  -6  -2  -5   76.50    2.90
   6   2   6  276.20    9.40
  -6  -2  -6  281.90    7.20
   6   2   7   63.40    5.10
  -6  -2  -7   67.70    3.80
   6   2   8    4.10    2.10
  -6  -2  -8    2.10    2.50
   6   2   9  138.10    7.50
  -6  -2  -9  131.60    4.50
   6   2  10    7.40    2.90
  -6  -2 -10    1.60    1.40
   6   2  11   26.70    4.30
  -6  -2 -11   21.40    2.20
   6   2  12    2.80    1.30
  -6  -2 -12    1.60    1.50
   6   2  13    2.60    1.80
  -6  -2 -13    4.00    1.80
   6   2  14   50.10    3.90
  -6  -2 -14   54.50    3.40
   6   2  15   26.60    3.10
  -6  -2 -15   32.90    2.80
   6   2  16   10.00    3.20
  -6  -2 -16   11.70    2.40
   6   2  17    1.20    3.00
  -6  -2 -17    3.60    1.90
  -6  -2 -18    0.50    2.50
  -6  -2 -19    5.30    3.20
  -6  -2 -20   -4.20    4.40
   6   3 -17   52.40    9.70
   6   3 -16  119.70   15.10
   6   3 -15    3.00    5.50
   6   3 -14    9.40    5.00
   6   3 -13   15.90    4.70
   6   3 -12   33.90    6.40
   6   3 -11    9.70    3.50
   6   3 -10    0.10    4.00
   6   3  -9  285.60   16.60
  -6  -3   9  273.90   18.40
   6   3  -8    7.90    5.30
  -6  -3   8   13.10    5.00
   6   3  -7    7.80    3.90
  -6  -3   7   10.80    3.10
  -6  -3   6    7.80    2.50
  -6  -3   5    1.70    2.10
  -6  -3   4   -0.90    2.30
  -6  -3   3    1.90    2.70
  -6  -3   2    0.70    1.80
   6   3  -1   41.40    5.00
  -6  -3   1   42.50    3.10
   6   3   0   15.90    2.90
  -6  -3   0   16.80    3.90
   6   3   1   53.90    2.80
  -6  -3  -1   46.90    4.00
   6   3   2   -1.10    2.10
  -6  -3  -2   -2.60    3.30
   6   3   3   -0.30    2.00
  -6  -3  -3   -3.10    2.80
   6   3   4   84.10    3.00
  -6  -3  -4   84.30    5.50
   6   3   5   62.00    2.60
  -6  -3  -5   61.80    2.50
   6   3   6   18.40    1.60
  -6  -3  -6   22.20    1.60
   6   3   7    0.70    1.70
  -6  -3  -7    2.20    2.10
   6   3   8  132.20    9.10
  -6  -3  -8  137.10    5.80
   6   3   9   25.30    3.00
  -6  -3  -9   23.90    2.50
   6   3  10   41.80    5.00
  -6  -3 -10   40.90    2.40
   6   3  11    5.90    3.20
  -6  -3 -11   12.00    1.50
   6   3  12    7.60    4.40
  -6  -3 -12    3.50    1.90
   6   3  13   36.30    5.10
  -6  -3 -13   52.00    3.00
   6   3  14   13.30    2.00
  -6  -3 -14   15.10    1.90
   6   3  15   33.20    2.90
  -6  -3 -15   35.40    2.80
   6   3  16   15.90    2.80
  -6  -3 -16   23.90    2.60
   6   3  17    4.30    2.20
  -6  -3 -17    9.80    1.90
  -6  -3 -18    0.20    2.60
  -6  -3 -19   11.00    3.00
  -6  -3 -20    7.30    5.70
   6   4 -17   -1.50    6.50
   6   4 -16   -5.50    5.80
   6   4 -15   -6.90    4.70
   6   4 -14   10.40    4.90
   6   4 -13   -2.50    6.60
   6   4 -12   66.90    8.00
   6   4 -11    0.00    4.20
   6   4 -10  -11.60    6.00
   6   4  -9  134.70   10.60
  -6  -4   9  130.70    7.50
  -6  -4   8   16.00    3.20
  -6  -4   7   69.90    4.60
  -6  -4   6    8.60    3.40
  -6  -4   5   -2.50    2.80
  -6  -4   4  110.20    5.60
  -6  -4   3   17.90    2.40
  -6  -4   2   31.70    3.40
  -6  -4   1   84.00    4.10
   6   4   0   29.90    2.70
  -6  -4   0   26.20    4.20
   6   4   1   13.60    2.30
  -6  -4  -1   11.50    5.50
   6   4   2   14.80    2.20
  -6  -4  -2   12.60    2.80
   6   4   3    5.10    1.90
  -6  -4  -3    7.90    3.10
   6   4   4    4.30    2.20
  -6  -4  -4    5.90    3.50
   6   4   5    0.10    1.60
  -6  -4  -5   -1.40    2.50
   6   4   6   88.80    2.90
  -6  -4  -6   92.70    3.90
   6   4   7    2.60    1.50
  -6  -4  -7   -2.20    1.70
   6   4   8   11.40    3.60
  -6  -4  -8    9.50    2.30
   6   4   9   12.60    4.30
  -6  -4  -9    2.90    2.00
   6   4  10   13.80    4.30
  -6  -4 -10   12.10    2.40
   6   4  11    2.80    2.90
  -6  -4 -11    7.30    2.40
   6   4  12  140.70   10.50
  -6  -4 -12  134.60    5.00
   6   4  13    7.10    3.60
  -6  -4 -13   16.30    1.80
   6   4  14  100.40    8.00
  -6  -4 -14   87.30    4.30
   6   4  15   -1.70    6.00
  -6  -4 -15    2.50    1.50
   6   4  16    0.90    1.30
  -6  -4 -16    2.90    1.40
   6   4  17   56.90    4.30
  -6  -4 -17   58.40    4.30
  -6  -4 -18    7.20    3.20
  -6  -4 -19   -4.10    2.20
  -6  -4 -20   -0.20    4.20
   6   5 -16   11.90    8.70
   6   5 -15   13.90    6.90
   6   5 -14   40.80    8.80
   6   5 -13   27.80    6.10
  -6  -5  13   28.60    7.20
   6   5 -12   55.60    7.30
[truncated: 204,369 more chars]
